# Supplementary material for: Harnessing Connectivity in a Large-Scale Small-Molecule Sensitivity Dataset
Source: Oxford University Press journal article supplement (doi:10.1158/2159-8290.cd-15-0235), 2015-10-19
Supplement: 21598290cd150235-sup-145780_2_supp_3058746_nrhtdz.xlsx [file 21598290cd150235-sup-145780_2_supp_3058746_nrhtdz.xlsx]

## Sheet: Index
Description of Supplemental Tables S1-S7
S1	small-molecule informer set	Description of the small-molecule informer set used in the sensitivity profiling experiment, including protein target or activity.
S2	cancer cell-line panel	Description of the cancer cell lines profiled in this experiment; for a clarification of growth media compositions, see Supplemental Table S10.
S3	area-under-sensitivity-curve values	Area-under-sensitivity-curve (AUC) values for each compound-cell line pair using the indices provided in Supplemental Table S1 and Supplemental Table S2.
S4	compound target annotations	Compound target annotations used for ACME analysis of the compound dendrogram.
S5	cellular feature annotations	Cellular feature annotations used for ACME analysis of the cell-line dendrogram.
S6	cell-line mutation annotations	Mutation annotations of the cancer cell lines used in ACME analysis of the cell-line dendrogram.
S7	ACME results table	Results of ACME analysis of sensitivity profiling data.

## Sheet: S1
index_cpd	compound_name	broad_cpd_id	top_conc_micromolar	compound_status	gene_name_of_protein_target	target_or_activity_of_compound	compound_cluster_id	compound_smiles
1	ML311	BRD-A40802033	66	probe	MCL1	inhibitor of MCL1	65;132;227;336;358;372;425;447;476;478;479	CCN1CCN(CC1)C(c1ccc(cc1)C(F)(F)F)c1ccc2cccnc2c1O
2	zebularine	BRD-A01145011	590	probe	DNMT1	inhibitor of DNA methyltransferases	368;429;468;477	OC[C@H]1O[C@H](C(O)[C@H]1O)n1cccnc1=O
3	BRD-A02303741	BRD-A02303741	55	probe	DOT1L	inhibitor of histone methyltransferases	332;402;453;466;469;472;476;478;479	CC(C)N(CCCNC(=O)Nc1ccc(cc1)C(C)(C)C)C[C@H]1O[C@H](C(O)[C@H]1O)n1cnc2c(N)ncnc12
4	importazole	BRD-A02481876	200	probe	KPNB1	inhibitor of importin	81;228;345;383;450;471;477	CC(Nc1nc(nc2ccccc12)N1CCCC1)c1ccccc1
5	SR8278	BRD-A02904414	66	probe	NR1D1	antagonist of Rev-ErbAalpha	378;424;442;456;466;469;472;476;478;479	CCOC(=O)C1Cc2ccccc2CN1C(=O)c1ccc(SC)s1
6	elocalcitol	BRD-A04287157	66	clinical	VDR	agonist of vitamin D receptor	306;331;410;438;445;467;475;479	CCC(O)(CC)\C=C\CC(C)C1=CC[C@@H]2[C@]1(C)CCC\C2=C/C=C1/C[C@@H](O)C[C@H](F)C1=C
7	BRD-A05715709	BRD-A05715709	66	probe	IDH1	putative inhibitor of IDH1 R132H	258;390;415;448;468;477	Cc1ccccc1C(N(C(=O)Cc1ccncc1)c1cccc(F)c1)C(=O)NC1CCCCC1
8	docetaxel	BRD-A05821830	66	FDA		inhibitor of microtubule assembly	87;96;140;199;227;336;358;372;425;447;476;478;479	CC(=O)O[C@@]12CO[C@@H]1C[C@H](O)[C@]1(C)C2[C@H](OC(=O)c2ccccc2)[C@]2(O)C[C@H](OC(=O)[C@H](O)[C@@H](NC(=O)OC(C)(C)C)c3ccccc3)C(C)=C([C@@H](O)C1=O)C2(C)C
9	cyclophosphamide	BRD-A09722536	130	FDA		DNA alkylator	203;339;389;463;473;478;479	ClCCN(CCCl)P1(=O)NCCCO1
10	3-Cl-AHPC	BRD-A09890259	66	probe	NR0B2	binder of nuclear receptor SHP	15;90;116;184;312;404;423;445;467;475;479	OC(=O)\C=C\c1ccc(c(Cl)c1)-c1ccc(O)c(c1)C12C[C@H]3C[C@H](C[C@H](C3)C1)C2
11	nutlin-3	BRD-A12230535	150	clinical	MDM2	inhibitor of p53-MDM2 interaction	252;328;374;403;449;461;467;475;479	COc1ccc(C2=NC(C(N2C(=O)N2CCNC(=O)C2)c2ccc(Cl)cc2)c2ccc(Cl)cc2)c(OC(C)C)c1
12	NVP-231	BRD-A12571627	66	probe	CERK	inhibitor of ceramide kinase	132;227;336;358;372;425;447;476;478;479	O=C(Nc1nc2ccc(NC(=O)C34C[C@H]5C[C@H](C[C@H](C5)C3)C4)cc2s1)c1ccccc1
13	triptolide	BRD-A13122391	0.3	clinical		natural product; inhibitor of RNA polymerase II	222;260;374;403;449;461;467;475;479	CC(C)[C@]12O[C@H]1[C@@H]1O[C@]11[C@]3(O[C@H]3CC3C4=C(CC[C@]13C)C(=O)OC4)[C@@H]2O
14	avicin D	BRD-A15100685	66	probe		natural product	426;443;464;469;472;476;478;479	CC1O[C@@H](OCC2O[C@@H](O[C@H]3CC[C@@]4(C)C(CC[C@]5(C)C4CC=C4C6CC(C)(C)[C@H](C[C@@]6([C@H](O)C[C@@]54C)C(=O)O[C@@H]4OC(CO)[C@@H](O)[C@@H](O)[C@@H]4O[C@@H]4OC(C)[C@H](O[C@@H]5O[C@@H](CO)[C@H](O)[C@@H]5O)[C@@H](O[C@@H]5OC(CO)[C@@H](O)[C@@H](O)[C@@H]5O)[C@@H]4O)OC(=O)C(\CO)=C\CC[C@](C)(O[C@@H]4OC(C)[C@@H](OC(=O)C(\CO)=C\CCC(C)(O)C=C)[C@@H](O)[C@@H]4O)C=C)C3(C)C)[C@@H](NC(C)=O)[C@H](O)[C@@H]2O)[C@@H](…
15	Bax channel blocker	BRD-A18763547	33	probe	BAX	inhibitor of BAX-mediated mitochondrial cytochrome c release	147;213;287;313;371;430;457;461;467;475;479	OC(CN1CCNCC1)Cn1c2ccc(Br)cc2c2cc(Br)ccc12
16	CCT036477	BRD-A22997170	33	probe		inhibitor of WNT signaling by blocking beta-catenin transcription	223;304;376;394;437;449;461;467;475;479	Cc1[nH]c2ccccc2c1C(Nc1ccccn1)c1ccc(Cl)cc1
17	erastin	BRD-A25004090	66	probe	SLC7A11;VDAC1;VDAC2	modulator of voltage-dependent anion channels; inhibitor of solute carrier SLC7A11	117;207;333;426;443;464;469;472;476;478;479	CCOc1ccccc1-n1c(=O)c2ccccc2nc1C(C)N1CCN(CC1)C(=O)COc1ccc(Cl)cc1
18	cucurbitacin I	BRD-A28105619	33	probe		natural product; modulator of NFKB1 and STAT3 signaling	179;222;260;374;403;449;461;467;475;479	CC(C)(O)\C=C\C(=O)[C@](C)(O)C1[C@H](O)C[C@@]2(C)C3CC=C4C(CC(=O)C(=O)C4(C)C)[C@]3(C)C(=O)C[C@]12C
19	paclitaxel	BRD-A28746609	66	FDA		inhibitor of microtubule assembly	24;39;50;75;85;199;227;336;358;372;425;447;476;478;479	CC(=O)O[C@@H]1C2=C(C)[C@H](C[C@@](O)([C@@H](OC(=O)c3ccccc3)C3[C@@]4(CO[C@@H]4C[C@H](O)[C@@]3(C)C1=O)OC(C)=O)C2(C)C)OC(=O)[C@H](O)[C@@H](NC(=O)c1ccccc1)c1ccccc1
20	hyperforin	BRD-A30032852	66	clinical	TRPC6	agonist of calcium-permeable ion channels	216;296;350;386;409;450;471;477	CC(C)C(=O)[C@@]12C(=O)C(CC=C(C)C)C(=O)C(CC=C(C)C)(C[C@H](CC=C(C)C)[C@@]1(C)CCC=C(C)C)C2=O
21	brefeldin A	BRD-A31107743	37	probe	ARF1	modulator of ADP-ribosylation factor 1; inhibitor of protein translocation from ER to Golgi	278;336;358;372;425;447;476;478;479	CC1CCC\C=C/C2CC(O)CC2C(O)\C=C/C(=O)O1
22	tigecycline	BRD-A34462049	66	FDA		analog of tetracycline	220;393;416;455;464;469;472;476;478;479	CN(C)[C@H]1[C@@H]2C[C@@H]3Cc4c(cc(NC(=O)CNC(C)(C)C)c(O)c4C(=O)C3C(=O)[C@]2(O)C(=O)C(C(N)=O)C1=O)N(C)C
23	itraconazole	BRD-A34817987	17	FDA		anti-fungal agent; inhibitor of hedgehog signaling pathway	256;381;418;442;456;466;469;472;476;478;479	CCC(C)n1ncn(-c2ccc(cc2)N2CCN(CC2)c2ccc(OCC3COC(Cn4cncn4)(O3)c3ccc(Cl)cc3Cl)cc2)c1=O
24	dexamethasone	BRD-A35108200	33	FDA	NR3C1	agonist of glucocorticoid receptor	329;359;452;462;471;477	CC1CC2C3CCC4=CC(=O)C=CC4(C)C3(F)C(O)CC2(C)C1(O)C(=O)CO
25	teniposide	BRD-A35588707	33	FDA	TOP2A;TOP2B	inhibitor of topoisomerase II	42;72;224;240;312;404;423;445;467;475;479	COc1cc(cc(OC)c1O)[C@H]1[C@@H]2C(COC2=O)C(O[C@@H]2O[C@@H]3CO[C@H](OC3[C@H](O)[C@H]2O)c2cccs2)c2cc3OCOc3cc12
26	ML162	BRD-A36275421	33	probe		selectively kills engineered cells expressing mutant HRAS	2;6;117;207;333;426;443;464;469;472;476;478;479	COc1ccc(cc1Cl)N(C(C(=O)NCCc1ccccc1)c1cccs1)C(=O)CCl
27	necrostatin-1	BRD-A36318220	530	probe	RIPK1	inhibitor of receptor-interacting protein kinase 1; inhibitor of the necroptosis cell death pathway	209;335;389;463;473;478;479	CN1C(=S)NC(Cc2c[nH]c3ccccc23)C1=O
28	SN-38	BRD-A36630025	1.3	probe	TOP1	metabolite of irinotecan; inhibitor of topoisomerase I	12;73;129;184;312;404;423;445;467;475;479	CCc1c2Cn3c(cc4c(COC(=O)C4(O)CC)c3=O)-c2nc2ccc(O)cc12
29	ciclosporin	BRD-A38030642	33	FDA	PPID	inhibitor of calcineurin by binding to cyclophilin D	349;377;427;446;460;465;474;475;479	CCC1NC(=O)C([C@H](O)[C@H](C)C\C=C\C)N(C)C(=O)C(C(C)C)N(C)C(=O)C(CC(C)C)N(C)C(=O)C(CC(C)C)N(C)C(=O)[C@@H](C)NC(=O)C(C)NC(=O)C(CC(C)C)N(C)C(=O)C(NC(=O)C(CC(C)C)N(C)C(=O)CN(C)C1=O)C(C)C
30	TGX-221	BRD-A41692738	66	probe	PIK3CB	inhibitor of PI3K catalytic subunit beta	84;97;281;431;460;465;474;475;479	CC(Nc1ccccc1)c1cc(C)cn2c1nc(cc2=O)N1CCOCC1
31	bleomycin A2	BRD-A42083487	66	FDA		inducer of DNA damage	224;240;312;404;423;445;467;475;479	C[C@@H](O)[C@@H](NC(=O)[C@H](C)[C@@H](O)[C@H](C)NC(=O)[C@@H](NC(=O)c1nc(nc(N)c1C)[C@H](CC(N)=O)NC[C@@H](N)C(N)=O)C(O[C@H]1O[C@H](CO)[C@H](O)[C@@H](O)[C@H]1O[C@H]1O[C@H](CO)[C@@H](O)[C@H](OC(N)=O)[C@@H]1O)c1c[nH]cn1)C(=O)NCCc1nc(cs1)-c1nc(cs1)C(=O)NCCC[S+](C)C
32	compound 1B	BRD-A42556028	66	probe		screening hit	55;408;453;466;469;472;476;478;479	CCN(CC)c1ccc(cc1[N+]([O-])=O)C1=NNC(=O)CC1C
33	968	BRD-A43210826	66	probe	GLS	inhibitor of glutaminase	367;417;437;449;461;467;475;479	CN(C)c1ccc(cc1Br)C1Nc2ccc3ccccc3c2C2=C1C(=O)CC(C)(C)C2
34	fluvastatin	BRD-A52530402	66	FDA	HMGCR	inhibitor of HMG-CoA reductase	172;397;443;464;469;472;476;478;479	CC(C)N1C(\C=C\C(O)CC(O)CC(O)=O)C(c2ccccc12)c1ccc(F)cc1
35	PX-12	BRD-A56592690	100	clinical	TXN	inhibitor of thioredoxin-1	57;223;304;376;394;437;449;461;467;475;479	CCC(C)SSc1ncc[nH]1
36	PD318088	BRD-A57798112	66	probe	MAP2K1;MAP2K2	inhibitor of MEK1 and MEK2	1;33;348;436;470;474;475;479	OCC(O)CONC(=O)c1cc(Br)c(F)c(F)c1Nc1ccc(I)cc1F
37	COL-3	BRD-A59431241	66	clinical		analog of tetracycline	220;393;416;455;464;469;472;476;478;479	NC(=O)C1C(=O)C[C@@H]2C[C@@H]3Cc4cccc(O)c4C(=O)C3C(=O)[C@]2(O)C1=O
38	YK 4-279	BRD-A62182663	33	probe	DHX9;ERG;ETV1	inhibitor of RNA helicase A (RHA) binding to EWS-FLI1; inhibitor of ERG and ETV1 activity	4;58;87;96;140;199;227;336;358;372;425;447;476;478;479	COc1ccc(cc1)C(=O)CC1(O)C(=O)Nc2c1c(Cl)ccc2Cl
39	fumonisin B1	BRD-A63646118	500	probe	CERS1;CERS2;CERS3;CERS4;CERS5;CERS6	inhibitor of ceramide synthase	204;377;427;446;460;465;474;475;479	CCCC[C@@H](C)[C@@H](OC(=O)C[C@@H](CC(O)=O)C(O)=O)[C@H](CC(C)C[C@H](O)CCCC[C@@H](O)C[C@H](O)[C@H](C)N)OC(=O)C[C@@H](CC(O)=O)C(O)=O
40	ifosfamide	BRD-A67097164	66	FDA		DNA alkylator	415;448;468;477	ClCCNP1(=O)OCCCN1CCCl
41	salermide	BRD-A67788537	400	probe	SIRT1;SIRT2	inhibitor of sirtuin 1 and sirtuin 2	230;337;409;450;471;477	CC(C(=O)Nc1cccc(c1)\N=C\c1c(O)ccc2ccccc12)c1ccccc1
42	BCL-LZH-4	BRD-A68258842	66	probe		inhibitor of BCL2, BCL-xL, and MCL1	244;400;441;459;473;478;479	COc1ccc(cc1)C1C(C(=O)Nc2ccccc2)=C(C)N=c2s\c(=C/c3cn(Cc4ccccc4)c4ccccc34)c(=O)n12
43	isoevodiamine	BRD-A68631409	33	probe		natural product	4;58;87;96;140;199;227;336;358;372;425;447;476;478;479	CN1C2N(CCc3c2[nH]c2ccccc32)C(=O)c2ccccc12
44	lovastatin	BRD-A70155556	130	FDA	HMGCR	inhibitor of HMG-CoA reductase	37;172;397;443;464;469;472;476;478;479	CCC(C)C(=O)OC1CC(C)C=C2C=CC(C)C(CCC(O)CC(O)CC(O)=O)C12
45	BRD-A71883111	BRD-A71883111	33	probe	IDH1	putative inhibitor of IDH1 R132H	210;300;349;377;427;446;460;465;474;475;479	Fc1cccc(c1)N(C(C(=O)NC1CCCCC1)c1ccccc1Cl)C(=O)Cc1cccs1
46	blebbistatin	BRD-A75817871	130	probe	MYH1;MYH2	inhibitor of myosin II ATPases	264;319;435;459;473;478;479	Cc1ccc2N=C3N(CCC3(O)C(=O)c2c1)c1ccccc1
47	myriocin	BRD-A76279427	33	probe	SPTLC1;SPTLC2;SPTLC3	inhibitor of serine palmitoyltransferase	280;433;451;454;470;474;475;479	CCCCCCC(=O)CCCCCC\C=C\C[C@H](O)[C@@H](O)C(N)(CO)C(O)=O
48	IPR-456	BRD-A76527075	66	probe	PLAUR	inhibitor of the interaction of urokinase receptor with binding partners	92;143;288;395;411;446;460;465;474;475;479	CC1CC(C)CN(C1)c1cc(Nc2ccccc2C(O)=O)c2C(=O)c3ccccc3-c3onc1c23
49	NSC23766	BRD-A80213327	530	probe	RAC1;TIAM1;TRIO	inhibitor of RAC1-GEF interaction; prevents Rac1 activation by Rac-specific guanine nucleotide exchange factors (GEFs) TrioN and Tiam1	164;310;371;430;457;461;467;475;479	CCN(CC)CCCC(C)Nc1nc(C)cc(Nc2ccc3nc(C)cc(N)c3c2)n1
50	oligomycin A	BRD-A81541225	33	probe	ATP5L2	inhibitor of mitochondrial ATP synthase	32;64;139;298;424;442;456;466;469;472;476;478;479	CCC1CCC2OC3(CC[C@@H](C)C(C[C@H](C)O)O3)[C@H](C)C(OC(=O)\C=C\[C@@H](C)[C@H](O)[C@@H](C)C(=O)[C@H](C)[C@@H](O)[C@H](C)C(=O)[C@@](C)(O)[C@H](O)[C@@H](C)C\C=C\C=C\1)[C@H]2C
51	ML258	BRD-A82720512	66	probe	BCL2L10	inhibitor of BIM-BCL-B interaction	302;319;435;459;473;478;479	COc1ccc(CN2c3nnnn3C3C(C2=O)C2(CCCC2)Cc2ccccc32)cc1
52	ML050	BRD-A83255679	66	probe	GPER1	antagonist of GPR30	149;346;398;440;458;465;474;475;479	Brc1cc2OCOc2cc1C1Nc2ccccc2C2C=CCC12
53	fulvestrant	BRD-A85667082	66	FDA	ESR1;GPER1	antagonist of the estrogen receptor	277;406;456;466;469;472;476;478;479	C[C@]12CC[C@H]3[C@H]([C@@H]1CC[C@@H]2O)[C@H](CCCCCCCCCS(=O)CCCC(F)(F)C(F)(F)F)Cc1cc(O)ccc31
54	BRD-A86708339	BRD-A86708339	66	probe		screening hit	160;325;396;439;457;461;467;475;479	Cc1ccc(cc1)C(NC(=O)c1ccccc1)c1ccc2cccnc2c1O
55	CID-5951923	BRD-A86956638	66	probe	KLF5	modulator of KLF5 expression	225;262;338;363;462;471;477	CN(C1CCS(=O)(=O)C1)C(=O)COC(=O)\C=C\c1cccc(c1)[N+]([O-])=O
56	FQI-1	BRD-A91658086	33	probe		inhibitor of LSF1-mediated transcription	20;140;199;227;336;358;372;425;447;476;478;479	CCOc1ccccc1C1CC(=O)Nc2cc3OCOc3cc12
57	thalidomide	BRD-A93255169	66	FDA	CRBN	immunomodulatory drug; binder of cereblon	226;340;398;440;458;465;474;475;479	O=C1N(C2CCC(=O)NC2=O)C(=O)c2ccccc12
58	temozolomide	BRD-A94153989	66	FDA		DNA alkylator	390;415;448;468;477	CN1N=Nc2c(ncn2C1=O)C(=O)N
59	BRD-A94377914	BRD-A94377914	33	probe	HDAC1;HDAC2;HDAC3;HDAC6;HDAC8	inhibitor of HDAC1, HDAC2, HDAC3, HDAC6, and HDAC8	192;282;356;432;451;454;470;474;475;479	CN1CCCCC1NC(=O)[C@H](CCCCCC(C)=O)C(=O)Nc1nc(cs1)-c1ccccc1
60	cyanoquinoline 11	BRD-K00088062	130	clinical	MAP3K8	inhibitor of MAP3K8; inhibitor of phosphorylated EGFR in cells	330;351;403;449;461;467;475;479	Fc1ccc(Nc2c(cnc3c(Cl)cc(NCc4cnc[nH]4)cc23)C#N)cc1Cl
61	RITA	BRD-K00317371	33	probe	MDM2;TP53	inhibitor of p53-MDM2 interaction	369;417;437;449;461;467;475;479	OCc1ccc(s1)-c1ccc(o1)-c1ccc(CO)s1
62	tubastatin A	BRD-K00627859	33	probe	HDAC6	inhibitor of tubulin deacetylase activity of HDAC6	142;205;354;435;459;473;478;479	CN1CCc2c(C1)c1ccccc1n2Cc1ccc(cc1)C(=O)NO
63	ML239	BRD-K01121114	66	probe		ML239; inhibitor of breast cancer stem cell proliferation	391;418;442;456;466;469;472;476;478;479	Clc1cc(Cl)c(OCC(=O)N\N=C\c2ccc[nH]2)c(Cl)c1
64	LRRK2-IN-1	BRD-K01436366	66	probe	DCLK1;LRRK2	inhibitor of leucine-rich repeat kinase 2; inhibitor of doublecortin-like kinase	125;328;374;403;449;461;467;475;479	COc1cc(ccc1Nc1ncc2N(C)C(=O)c3ccccc3N(C)c2n1)C(=O)N1CCC(CC1)N1CCN(C)CC1
65	pyrazolanthrone	BRD-K01567962	66	probe	MAPK10;MAPK8;MAPK9	inhibitor of Jun N-terminal kinase (JNK) 1/2/3	146;245;323;404;423;445;467;475;479	O=C1c2ccccc2-c2n[nH]c3cccc1c23
66	BRD-K01737880	BRD-K01737880	66	probe		screening hit	352;416;455;464;469;472;476;478;479	COc1ccc(NC(=O)Nc2ccc3O[C@@H](CN(C)Cc4ccc5OCOc5c4)[C@@H](C)CN([C@@H](C)CO)C(=O)c3c2)cc1
67	ML210	BRD-K01877528	33	probe		selectively kills engineered cells expressing mutant HRAS	6;117;207;333;426;443;464;469;472;476;478;479	Cc1onc(C(=O)N2CCN(CC2)C(c2ccc(Cl)cc2)c2ccc(Cl)cc2)c1[N+]([O-])=O
68	NVP-BSK805	BRD-K02017404	66	probe	JAK2	inhibitor of Janus kinase 2	56;137;198;293;370;380;421;438;445;467;475;479	Fc1cc(cc(F)c1CN1CCOCC1)-c1cccc2ncc(nc12)-c1cnn(c1)C1CCNCC1
69	olaparib	BRD-K02113016	150	clinical	PARP1;PARP2	inhibitor of poly (ADP-ribose) polymerase 1 and 2	161;260;374;403;449;461;467;475;479	Fc1ccc(Cc2n[nH]c(=O)c3ccccc23)cc1C(=O)N1CCN(CC1)C(=O)C1CC1
70	LBH-589	BRD-K02130563	66	clinical	HDAC1;HDAC2;HDAC3;HDAC6;HDAC8	inhibitor of HDAC1, HDAC2, HDAC3, HDAC6, and HDAC8	71;155;238;297;392;439;457;461;467;475;479	Cc1[nH]c2ccccc2c1CCNCc1ccc(\C=C\C(=O)NO)cc1
71	BRD-K02251932	BRD-K02251932	66	GE-active		product of diversity oriented synthesis	88;231;375;428;458;465;474;475;479	C[C@H](CO)N1C[C@H](C)[C@H](CN(C)C(=O)NC2CCCCC2)Oc2c(NS(=O)(=O)c3ccc(F)cc3)cccc2C1=O
72	parbendazole	BRD-K02407574	66	probe		inhibitor of microtubule assembly	9;10;19;39;50;75;85;199;227;336;358;372;425;447;476;478;479	CCCCc1ccc2[nH]c(NC(=O)OC)nc2c1
73	BRD-K02492147	BRD-K02492147	66	GE-active		product of diversity oriented synthesis	151;195;271;308;382;434;454;470;474;475;479	CN1CCN(CC1)C(=O)C[C@@H]1O[C@H](CO)[C@@H](NS(=O)(=O)c2cccc(F)c2)C=C1
74	QS-11	BRD-K02526760	33	probe	ARFGAP1	inhibitor of GTPase activating protein of ARF 1 (ARFGAP1)	361;384;429;468;477	OC[C@H](Cc1ccccc1)Nc1nc(Oc2ccc3CCCc3c2)nc2n(Cc3ccc(cc3)-c3ccccc3)cnc12
75	AT-406	BRD-K02834582	66	probe	XIAP	SMAC mimetic; inhibitor of inhibitor of apoptosis proteins (IAPs)	173;311;432;451;454;470;474;475;479	CNC(C)C(=O)NC1CN(CCC2CCC(N2C1=O)C(=O)NC(c3ccccc3)c4ccccc4)C(=O)CC(C)C
76	SU11274	BRD-K02965346	66	probe	MET	inhibitor of MET	232;306;331;410;438;445;467;475;479	CN(c1cccc(Cl)c1)S(=O)(=O)c1ccc2NC(=O)\C(=C/c3[nH]c(C)c(C(=O)N4CCN(C)CC4)c3C)c2c1
77	HC-067047	BRD-K03391209	66	probe	TRPV4	inhibitor of cation channel TRPV4	300;349;377;427;446;460;465;474;475;479	Cc1c(cc(-c2ccccc2)n1CCCN1CCOCC1)C(=O)Nc1cccc(c1)C(F)(F)F
78	azacitidine	BRD-K03406345	66	FDA	DNMT1	inhibitor of DNA methyltransferase	316;368;429;468;477	Nc1ncn([C@@H]2O[C@H](CO)[C@@H](O)[C@H]2O)c(=O)n1
79	foretinib	BRD-K03449891	66	clinical	KDR;MET	inhibitor of MET and VEGFR2	40;126;292;301;347;421;438;445;467;475;479	COc1cc2c(Oc3ccc(NC(=O)C4(CC4)C(=O)Nc4ccc(F)cc4)cc3F)ccnc2cc1OCCCN1CCOCC1
80	Merck60	BRD-K04466929	33	probe	HDAC1;HDAC2	inhibitor of HDAC1 and HDAC2	23;66;93;155;238;297;392;439;457;461;467;475;479	CC(=O)Nc1ccc(cc1)C(=O)Nc1cc(ccc1N)-c1cccs1
81	BIBR-1532	BRD-K04623885	270	probe	TERT	inhibitor of telomerase reverse transcriptase	236;350;386;409;450;471;477	C\C(=C/C(=O)Nc1ccccc1C(O)=O)c1ccc2ccccc2c1
82	BRD-K04800985	BRD-K04800985	67	GE-active		product of diversity oriented synthesis	231;375;428;458;465;474;475;479	C[C@@H](CO)N1C[C@@H](C)[C@@H](CN(C)CC2CCCCC2)Oc2ccc(NC(=O)Nc3c(C)noc3C)cc2C1=O
83	BMS-270394	BRD-K04905989	66	probe	RARG	antagonist of retinoic acid receptor gamma	149;346;398;440;458;465;474;475;479	CC1(C)CCC(C)(C)c2cc(ccc12)[C@@H](O)C(=O)Nc1ccc(cc1F)C(O)=O
84	GSK-3 inhibitor IX	BRD-K04923131	66	probe		inhibitor of JAK/STAT signaling	150;365;397;443;464;469;472;476;478;479	O\N=C1/C(Nc2ccccc12)=C1/C(=O)Nc2cc(Br)ccc12
85	CIL41	BRD-K05392795	160	probe		screening hit	279;333;426;443;464;469;472;476;478;479	N=C(NOC(=O)C12CC3CC(CC(C3)C1)C2)c1ccccc1
86	triazolothiadiazine	BRD-K05402890	66	probe	PDE4A;PDE4B;PDE4D	inhibitor of phosphdiesterase 4A/B/D	19;39;50;75;85;199;227;336;358;372;425;447;476;478;479	COc1ccc(OC)c(c1)-c1nnc2SCC(=Nn12)c1ccc(OC)c(OC)c1
87	BRD9647	BRD-K05649647	33	probe		screening hit	92;143;288;395;411;446;460;465;474;475;479	COc1ccc(cc1)N(C(=O)c1ccccc1)S(=O)(=O)c1cc(OC)ccc1OC
88	PDMP	BRD-K05653692	210	probe	UGCG	inhibitor of ceramide glucosyltransferase	303;362;396;439;457;461;467;475;479	CCCCCCCCCC(=O)N[C@H](CN1CCOCC1)[C@H](O)c1ccccc1
89	LE-135	BRD-K06593056	66	probe	RARB	antagonist of retinoic acid receptor beta	250;359;452;462;471;477	CN1c2cc3c(cc2N=C(c2ccc(cc2)C(O)=O)c2ccccc12)C(C)(C)CCC3(C)C
90	GSK1059615	BRD-K06750613	33	clinical	MTOR;PIK3CA;PIK3CB;PIK3CD;PIK3CG	inhibitor of PI3K and mTOR kinase activity	200;284;380;421;438;445;467;475;479	O=C1NC(=O)\C(S1)=C\c1ccc2nccc(-c3ccncc3)c2c1
91	narciclasine	BRD-K06792661	33	probe	RHOA	activates cellular activity of RhoA; modulator of Rho/Rho kinase/LIM kinase/cofilin signaling	41;61;105;166;257;315;372;425;447;476;478;479	O[C@H]1C=C2[C@@H](NC(=O)c3c(O)c4OCOc4cc23)[C@H](O)[C@@H]1O
92	AM-580	BRD-K06854232	530	probe	RARA	agonist of retinoic acid receptor alpha	190;228;345;383;450;471;477	CC1(C)CCC(C)(C)c2cc(ccc12)C(=O)Nc1ccc(cc1)C(O)=O
93	AA-COCF3	BRD-K07303502	270	probe	FAAH;PLA2G4A;PLA2G4B;PLA2G4C;PLA2G4D	inhibitor of cytosolic phospholipase A2; inhibitor of fatty acid amide hydrolase	317;337;409;450;471;477	CCCCC\C=C/C\C=C/C\C=C/C\C=C/CCCC(=O)C(F)(F)F
94	GSK525762A	BRD-K08109215	66	probe	BRD2;BRD3;BRD4	inhibitor of bromodomain (BRD) and extra-C terminal domain (BET) proteins	14;22;125;328;374;403;449;461;467;475;479	CCNC(=O)C[C@@H]1N=C(c2ccc(Cl)cc2)c2cc(OC)ccc2-n2c(C)nnc12
95	temsirolimus	BRD-K08177763	66	FDA	MTOR	inhibitor of mTOR	51;153;370;380;421;438;445;467;475;479	CO[C@@H]1C[C@H](C[C@@H](C)[C@@H]2CC(=O)[C@H](C)\C=C(C)\[C@@H](O)[C@@H](OC)C(=O)[C@H](C)C[C@H](C)\C=C\C=C\C=C(C)\[C@H](C[C@@H]3CC[C@@H](C)[C@@](O)(O3)C(=O)C(=O)N3CCCC[C@H]3C(=O)O2)OC)CC[C@H]1OC(=O)C(C)(CO)CO
96	SID 26681509	BRD-K08417745	300	probe	CTSL1	inhibitor of cathepsin L	243;344;410;438;445;467;475;479	CCc1ccccc1NC(=O)CSC(=O)NNC(=O)[C@@H](Cc1c[nH]c2ccccc12)NC(=O)OC(C)(C)C
97	linsitinib	BRD-K08589866	33	clinical	IGF1R;INSR	inhibitor of insulin-like growth factor 1 receptor and insulin receptor	98;175;351;403;449;461;467;475;479	CC1(O)CC(C1)c2nc(c3ccc4ccc(nc4c3)c5ccccc5)c6c(N)nccn26
98	C6-ceramide	BRD-K08608874	66	probe	MAPK1;PPP2CA;UGCG	inhibitor of glucosylceramide synthase; activator of MAP kinase (ERK); stimulator of protein phosphatase 2A	186;288;395;411;446;460;465;474;475;479	CCCCCCCCCCCCC\C=C\[C@@H](O)[C@H](CO)NC(=O)CCCCC
99	BRD-K09344309	BRD-K09344309	33	probe		screening hit	208;305;384;429;468;477	C[C@H](CO)N1C[C@@H](C)[C@H](CN(C)Cc2ccc3OCOc3c2)Oc2c(NC(=O)c3ccncc3)cccc2C1=O
100	GANT-61	BRD-K09485525	66	probe		inhibitor of hedgehog signaling pathway	263;407;430;457;461;467;475;479	CN(C)c1ccccc1CN1CCCN(Cc2ccccc2N(C)C)C1c1ccncc1
101	KU 0060648	BRD-K09499853	33	probe	PRKDC	inhibitor of DNA-dependent protein kinase	107;134;284;380;421;438;445;467;475;479	CCN1CCN(CC(=O)Nc2ccc(-c3cccc4c3oc(cc4=O)N3CCOCC3)c3sc4ccccc4c23)CC1
102	BRD-K09587429	BRD-K09587429	66	GE-active		product of diversity oriented synthesis	170;214;357;414;427;446;460;465;474;475;479	C[C@@H](NC(=O)C[C@@H]1CC[C@@H](NC(=O)CN2CCOCC2)[C@H](CO)O1)c1ccccc1
103	FGIN-1-27	BRD-K09778810	33	probe	TSPO	activator of peripheral benzodiazepine receptor/translocator protein	271;308;382;434;454;470;474;475;479	CCCCCCN(CCCCCC)C(=O)Cc1c([nH]c2ccccc12)-c1ccc(F)cc1
104	PRL-3 inhibitor I	BRD-K09907482	130	probe	PTP4A3	inhibitor of phosphatase of regenerating liver-3 (PRL3)	322;345;383;450;471;477	Brc1ccc(OCc2ccccc2Br)c(\C=C2\SC(=S)NC2=O)c1
105	dabrafenib	BRD-K09951645	66	clinical	BRAF	inhibitor of BRAF	106;177;283;420;455;464;469;472;476;478;479	CC(C)(C)c1nc(c(s1)-c1ccnc(N)n1)-c1cccc(NS(=O)(=O)c2c(F)cccc2F)c1F
106	avrainvillamide	BRD-K10466330	33	probe	NPM1	natural product; inhibitor of nucleophosmin	239;280;433;451;454;470;474;475;479	CC1(C)Oc2ccc3C4=C[C@@]56NC(=O)[C@]7(CCCN7C5=O)C[C@H]6C(C)(C)C4=[N+]([O-])c3c2C=C1
107	GW-405833	BRD-K10705233	130	probe	CNR2	partial agonist of cannabinoid receptor 2	94;213;287;313;371;430;457;461;467;475;479	COc1ccc2n(C(=O)c3cccc(Cl)c3Cl)c(C)c(CCN3CCOCC3)c2c1
108	B02	BRD-K10882151	130	probe	RAD51	inhibitor of RAD51	113;338;363;462;471;477	O=c1n(Cc2ccccc2)c(\C=C\c2cccnc2)nc2ccccc12
109	SR-II-138A	BRD-K11172604	33	probe	EIF4A2;EIF4E;EIF4G1	silvestrol analog; inhibits translation by modulating the eIF4F complex	5;41;61;105;166;257;315;372;425;447;476;478;479	CON(C)C(=O)[C@H]1[C@@H](O)[C@@]2(O)c3c(O[C@]2([C@@H]1c1ccccc1)c1ccc(OC)cc1)cc(OC)cc3OC
110	BRD-K11533227	BRD-K11533227	66	probe	HDAC1;HDAC2	inhibitor of HDAC1 and HDAC2	285;392;439;457;461;467;475;479	CC(=O)NC1CCN(CC1)C(=O)Nc1cc(ccc1N)-c1cccs1
111	PF-184	BRD-K11593101	66	probe	IKBKB	inhibitor of IKK-2	129;184;312;404;423;445;467;475;479	C[C@@]1(CO)CN(C[C@]1(C)CO)c1cc(C(=O)Nc2ccc3CCc4c(nn(c4-c3c2)-c2ccc(F)cc2)C(N)=O)c(Cl)cn1
112	CIL56	BRD-K11740178	2.5	probe		screening hit	207;333;426;443;464;469;472;476;478;479	ON=C1c2cc(ccc2-c2ccc(cc12)S(=O)(=O)N1CCCCC1)S(=O)(=O)N1CCCCC1
113	AT7867	BRD-K12040459	66	probe	AKT1;AKT2;AKT3;RPS6KB2	inhibitor of AKT1/2/3 and S6K	211;293;370;380;421;438;445;467;475;479	Clc1ccc(cc1)C1(CCNCC1)c1ccc(cc1)-c1cn[nH]c1
114	NVP-BEZ235	BRD-K12184916	17	clinical	MTOR;PIK3CA;PIK3CB;PIK3CD;PIK3CG	inhibitor of PI3K and mTOR kinase activity	101;200;284;380;421;438;445;467;475;479	Cn1c2cnc3ccc(cc3c2n(-c2ccc(cc2)C(C)(C)C#N)c1=O)-c1cnc2ccccc2c1
115	trametinib	BRD-K12343256	66	clinical	MAP2K1;MAP2K2	inhibitor of MEK1 and MEK2	33;348;436;470;474;475;479	CC(=O)Nc1cccc(c1)-n1c2c(C)c(=O)n(C)c(Nc3ccc(I)cc3F)c2c(=O)n(C2CC2)c1=O
116	TG-101348	BRD-K12502280	37	clinical	JAK2	inhibitor of Janus kinase 2	56;137;198;293;370;380;421;438;445;467;475;479	Cc1cnc(Nc2ccc(OCCN3CCCC3)cc2)nc1Nc1cccc(c1)S(=O)(=O)NC(C)(C)C
117	valdecoxib	BRD-K12994359	600	FDA	PTGS2	inhibitor of cyclooxygenase-2 (COX2)	104;188;273;381;418;442;456;466;469;472;476;478;479	Cc1onc(c1-c1ccc(cc1)S(N)(=O)=O)-c1ccccc1
118	procarbazine	BRD-K13032584	66	FDA		inducer of DNA damage	335;389;463;473;478;479	CNNCc1ccc(cc1)C(=O)NC(C)C
119	ciclopirox	BRD-K13044802	66	FDA	RRM1	substituted pyridone antimycotic; inhibitor of the iron-dependent enzyme ribonucleotide reductase	112;160;325;396;439;457;461;467;475;479	Cc1cc(C2CCCCC2)n(O)c(=O)c1
120	BMS-754807	BRD-K13049116	33	probe	IGF1R	inhibitor of insulin-like growth factor 1 receptor and insulin receptor	53;76;175;351;403;449;461;467;475;479	C[C@]1(CCCN1c1nc(Nc2cc(n[nH]2)C2CC2)c2cccn2n1)C(=O)Nc1ccc(F)nc1
121	BMS-345541	BRD-K13566078	66	probe	IKBKB	inhibitor of IKK-2	145;166;257;315;372;425;447;476;478;479	Cc1cnc2c(NCCN)nc3ccc(C)cc3n12
122	dinaciclib	BRD-K13662825	66	clinical	CDK1;CDK2;CDK5;CDK9	inhibitor of cyclin-dependent kinases	11;145;166;257;315;372;425;447;476;478;479	CCc1cnn2c(NCc3ccc[n+]([O-])c3)cc(nc12)N1CCCC[C@H]1CCO
123	BRD-K13999467	BRD-K13999467	67	GE-active		product of diversity oriented synthesis	282;356;432;451;454;470;474;475;479	C[C@@H](CO)N1C[C@H](C)[C@H](CN(C)C(=O)Cc2ccncc2)Oc2cc(ccc2S1(=O)=O)C#Cc1ccccc1F
124	BRD-K14844214	BRD-K14844214	66	GE-active		product of diversity oriented synthesis	88;231;375;428;458;465;474;475;479	CC(C)CC#Cc1ccc2c(O[C@@H](CN(C)C(=O)c3cnccn3)[C@H](C)CN([C@H](C)CO)S2(=O)=O)c1
125	R428	BRD-K14870255	66	probe	AXL	inhibitor of the tyrosine-protein kinase receptor UFO	310;371;430;457;461;467;475;479	Nc1nc(Nc2ccc3CC[C@@H](CCc3c2)N2CCCC2)nn1-c1cc2CCCc3ccccc3-c2nn1
126	gemcitabine	BRD-K15108141	33	FDA	CMPK1;RRM1;TYMS	inhibitor of DNA replication; inhibitor of ribonucleotide reductase, thymidylate synthetase, and cytidine monophosphate (UMP-CMP) kinase	36;90;116;184;312;404;423;445;467;475;479	Nc1ccn([C@@H]2O[C@H](CO)[C@@H](O)C2(F)F)c(=O)n1
127	NVP-ADW742	BRD-K15179513	66	probe	IGF1R	inhibitor of insulin-like growth factor 1 receptor	98;175;351;403;449;461;467;475;479	Nc1ncnc2n(cc(-c3cccc(OCc4ccccc4)c3)c12)[C@H]1C[C@H](CN2CCCC2)C1
128	PRIMA-1	BRD-K15318909	170	probe	TP53	re-activator of the pro-apoptotic activity of mutant p53	57;223;304;376;394;437;449;461;467;475;479	OCC1(CO)N2CCC(CC2)C1=O
129	phloretin	BRD-K15563106	590	probe	SLC5A1	natural product; inhibitor of glucose uptake	188;273;381;418;442;456;466;469;472;476;478;479	Oc1ccc(CCC(=O)c2c(O)cc(O)cc2O)cc1
130	obatoclax	BRD-K15600710	66	clinical	BCL2;BCL2L1;MCL1	inhibitor of MCL1, BCL2, and BCL-xL	180;325;396;439;457;461;467;475;479	COC1=CC(=N\C\1=C/c1[nH]c(C)cc1C)c1cc2ccccc2[nH]1
131	BRD-K16147474	BRD-K16147474	66	GE-active		product of diversity oriented synthesis	233;382;434;454;470;474;475;479	CC(C)NC(=O)Nc1ccc2O[C@@H](CN(C)S(C)(=O)=O)[C@@H](C)CN([C@H](C)CO)C(=O)Cc2c1
132	CHIR-99021	BRD-K16189898	80	probe	GSK3B	inhibitor of GSK3 beta	150;365;397;443;464;469;472;476;478;479	Cc1c[nH]c(n1)-c1cnc(NCCNc2ccc(cn2)C#N)nc1-c1ccc(Cl)cc1Cl
133	PLX-4720	BRD-K16478699	33	probe	BRAF	inhibitor of BRAF	106;177;283;420;455;464;469;472;476;478;479	CCCS(=O)(=O)Nc1ccc(F)c(C(=O)c2c[nH]c3ncc(Cl)cc23)c1F
134	regorafenib	BRD-K16730910	66	FDA	BRAF;KDR;KIT;RET	inhibitor of BRAF, RET, KIT, and VEGFR2	67;194;216;296;350;386;409;450;471;477	CNC(=O)c1cc(Oc2ccc(NC(=O)Nc3ccc(Cl)c(c3)C(F)(F)F)c(F)c2)ccn1
135	sotrastaurin	BRD-K16761703	66	clinical	PRKCB	inhibitor of protein kinase C beta	261;362;396;439;457;461;467;475;479	CN1CCN(CC1)c1nc(C2=C(C(=O)NC2=O)c2c[nH]c3ccccc23)c2ccccc2n1
136	BRD-K17060750	BRD-K17060750	67	GE-active		product of diversity oriented synthesis	108;133;195;271;308;382;434;454;470;474;475;479	CN(C)CC(=O)N[C@@H]1CC[C@@H](CCNC(=O)Nc2ccc(F)cc2)O[C@H]1CO
137	bendamustine	BRD-K17068645	66	FDA		DNA alkylator	268;326;363;462;471;477	Cn1c(CCCC(O)=O)nc2cc(ccc12)N(CCCl)CCCl
138	SCH-79797	BRD-K17140735	37	probe	F2R	antagonist of proteinase-activated receptor 1 (PAR1)	201;422;447;476;478;479	CC(C)c1ccc(Cn2ccc3c2ccc2nc(NC4CC4)nc(N)c32)cc1
139	HLI 373	BRD-K17349619	33	probe	MDM2	inhibitor of MDM2	165;252;328;374;403;449;461;467;475;479	CN(C)CCCNc1c2ccccc2n(C)c2nc(=O)n(C)c(=O)c12
140	indisulam	BRD-K17610631	33	clinical	CA9	inhibitor of carbonic anhydrase isoform IX	154;240;312;404;423;445;467;475;479	NS(=O)(=O)c1ccc(cc1)S(=O)(=O)Nc1cccc2c(Cl)c[nH]c12
141	belinostat	BRD-K17743125	66	clinical	HDAC1;HDAC2;HDAC3;HDAC6;HDAC8	inhibitor of HDAC1, HDAC2, HDAC3, HDAC6, and HDAC8	71;155;238;297;392;439;457;461;467;475;479	ONC(=O)\C=C\c1cccc(c1)S(=O)(=O)Nc1ccccc1
142	staurosporine	BRD-K17953061	3.3	probe		inhibitor of multiple kinases	365;397;443;464;469;472;476;478;479	CN[C@@H]1C[C@H]2O[C@@](C)([C@@H]1OC)n1c3ccccc3c3c4CNC(=O)c4c4c5ccccc5n2c4c13
143	birinapant	BRD-K18589165	66	clinical	DIABLO;XIAP	SMAC mimetic; inhibitor of inhibitor of apoptosis proteins (IAPs)	173;311;432;451;454;470;474;475;479	CC[C@H](NC(=O)[C@H](C)NC)C(=O)N1C[C@@H](O)C[C@H]1Cc1c([nH]c2cc(F)ccc12)-c1cc2c(C[C@@H]3C[C@H](O)CN3C(=O)[C@H](CC)NC(=O)[C@H](C)NC)cc(F)cc2[nH]1
144	MK-0752	BRD-K18850819	66	clinical	APH1A;NCSTN;PSEN1;PSENEN	inhibitor of gamma-secretase	254;419;452;462;471;477	OC(=O)CC[C@H]1CC[C@@](CC1)(c1cc(F)ccc1F)S(=O)(=O)c1ccc(Cl)cc1
145	BRD-K19103580	BRD-K19103580	66	GE-active		product of diversity oriented synthesis	89;214;357;414;427;446;460;465;474;475;479	C[C@H](CO)N1C[C@H](C)[C@H](CN(C)Cc2ccc(Cl)c(Cl)c2)Oc2ccc(cc2C1=O)N(C)C
146	gossypol	BRD-K19295594	37	clinical	BCL2;BCL2L1;LDHA;LDHB;LDHC	inhibitor of lactate dehydrogenase; inhibitor of BCL2 family members	158;237;327;391;418;442;456;466;469;472;476;478;479	CC(C)c1c(O)c(O)c(C=O)c2c(O)c(c(C)cc12)-c1c(C)cc2c(C(C)C)c(O)c(O)c(C=O)c2c1O
147	prochlorperazine	BRD-K19352500	66	FDA	DRD2	inhibitor of dopamine receptor D2	124;197;313;371;430;457;461;467;475;479	CN1CCN(CCCN2c3ccccc3Sc3ccc(Cl)cc23)CC1
148	sitagliptin	BRD-K19416115	66	FDA	DPP4	inhibitor of dipetidyl peptidase-4	307;412;434;454;470;474;475;479	N[C@@H](CC(=O)N1CCn2c(C1)nnc2C(F)(F)F)Cc1cc(F)c(F)cc1F
149	SGX-523	BRD-K19477839	66	clinical	MET	inhibitor of MET	307;412;434;454;470;474;475;479	Cn1cc(cn1)-c1ccc2nnc(Sc3ccc4ncccc4c3)n2n1
150	saracatinib	BRD-K19540840	66	clinical	ABL1;SRC	inhibitor of SRC and ABL1	34;169;355;431;460;465;474;475;479	CN1CCN(CCOc2cc(OC3CCOCC3)c3c(Nc4c5OCOc5ccc4Cl)ncnc3c2)CC1
151	lapatinib	BRD-K19687926	66	FDA	EGFR;ERBB2	inhibitor of EGFR and HER2	21;47;59;79;102;168;202;355;431;460;465;474;475;479	CS(=O)(=O)CCNCc1ccc(o1)-c1ccc2ncnc(Nc3ccc(OCc4cccc(F)c4)c(Cl)c3)c2c1
152	erismodegib	BRD-K19796430	33	probe		screening hit	259;265;405;448;468;477	C[C@H]1CN(C[C@@H](C)O1)c1ccc(NC(=O)c2cccc(-c3ccc(OC(F)(F)F)cc3)c2C)cn1
153	MST-312	BRD-K19894101	33	probe	TERT	inhibitor of telomerase reverse transcriptase	122;237;327;391;418;442;456;466;469;472;476;478;479	Oc1cccc(C(=O)Nc2cccc(NC(=O)c3cccc(O)c3O)c2)c1O
154	CIL70	BRD-K20215950	40	probe		screening hit	279;333;426;443;464;469;472;476;478;479	Clc1ccc(CC(=N)NOC(=O)c2cccc3ccccc23)cc1
155	tamatinib	BRD-K20285085	33	clinical	SYK	inhibitor of spleen tyrosine kinase	176;292;301;347;421;438;445;467;475;479	COc1cc(Nc2ncc(F)c(Nc3ccc4OC(C)(C)C(=O)Nc4n3)n2)cc(OC)c1OC
156	SKI-II	BRD-K20755323	130	probe	SPHK1	inhibitor of sphingosine kinase 1	277;406;456;466;469;472;476;478;479	Oc1ccc(Nc2nc(cs2)-c2ccc(Cl)cc2)cc1
157	KW-2449	BRD-K21718444	66	clinical	AURKA;FLT3	inhibitor of FLT3 and AURKA	82;118;221;347;421;438;445;467;475;479	O=C(N1CCNCC1)c1ccc(cc1)\C=C\c1n[nH]c2ccccc12
158	RO4929097	BRD-K22024824	66	clinical	APH1A;NCSTN;PSEN1;PSENEN	inhibitor of gamma-secretase	348;436;470;474;475;479	CC(C)(C(=O)NCC(F)(F)C(F)(F)F)C(=O)N[C@H]1c2ccccc2-c2ccccc2NC1=O
159	simvastatin	BRD-K22134346	33	FDA	HMGCR	inhibitor of HMG-CoA reductase	37;172;397;443;464;469;472;476;478;479	CCC(C)(C)C(=O)O[C@H]1C[C@@H](C)C=C2C=C[C@H](C)[C@H](CC[C@@H]3C[C@@H](O)CC(=O)O3)[C@@H]12
160	STF-31	BRD-K22477529	66	probe	NAMPT	inhibitor of nicotinamide phosphoribosyltransferase	16;43;217;385;422;447;476;478;479	CC(C)(C)c1ccc(cc1)S(=O)(=O)NCc1ccc(cc1)C(=O)Nc1cccnc1
161	BRD8899	BRD-K22828899	33	probe	STK33	inhibitor of serine/threonine kinasase STK33	329;359;452;462;471;477	CC(=O)NC[C@@H]1C[C@H](CN1)NS(=O)(=O)c1cccc2cncc(C)c12
162	CR-1-31B	BRD-K23547378	33	probe	EIF4A2;EIF4E;EIF4G1	silvestrol analog; inhibits translation by modulating the eIF4F complex	5;41;61;105;166;257;315;372;425;447;476;478;479	CONC(=O)[C@H]1[C@@H](O)[C@@]2(O)c3c(O[C@]2([C@@H]1c1ccccc1)c1ccc(OC)cc1)cc(OC)cc3OC
163	1S,3R-RSL-3	BRD-K23853216	33	probe	GPX4	synthetic lethal with HRAS in engineered cells; inhibitor of GPX4	2;6;117;207;333;426;443;464;469;472;476;478;479	COC(=O)[C@H]1Cc2c([nH]c3ccccc23)[C@@H](N1C(=O)CCl)c1ccc(cc1)C(=O)OC
164	sorafenib	BRD-K23984367	66	FDA	BRAF;FLT3;KDR;RAF1	inhibitor of BRAF, CRAF, and VEGFR2	67;194;216;296;350;386;409;450;471;477	CNC(=O)c1cc(Oc2ccc(NC(=O)Nc3ccc(Cl)c(c3)C(F)(F)F)cc2)ccn1
165	piperlongumine	BRD-K24132293	33	probe		natural product; modulator of ROS levels	70;120;159;215;304;376;394;437;449;461;467;475;479	COc1cc(cc(OC)c1OC)\C=C\C(=O)N1CCC=CC1=O
166	SCH-529074	BRD-K24376488	33	probe	TP53	activator of mutant p53	111;287;313;371;430;457;461;467;475;479	CN(C)CCCNc1nc(CN2CCN(CC2)C(c2ccc(Cl)cc2)c2ccc(Cl)cc2)nc2ccccc12
167	ETP-46464	BRD-K24556407	66	probe	ATM;ATR	inhibitor of serine/threonine-protein kinase ATR	246;299;344;410;438;445;467;475;479	CC(C)(C#N)c1ccc(cc1)N1C(=O)OCc2cnc3ccc(cc3c12)-c1cnc2ccccc2c1
168	BRD-K24690302	BRD-K24690302	66	probe	HDAC1	inhibitor of HDAC1	136;250;359;452;462;471;477	CN(C)CC1CN(C1)C(=O)Nc1cc(ccc1N)-c1ccc(F)cc1
169	FSC231	BRD-K24784241	270	probe	PICK1	inhibitor of PDZ domain of protein interacting with PRKCA 1 (PICK1)	264;319;435;459;473;478;479	CCOC(=O)NC(=O)C(=C\c1ccc(Cl)c(Cl)c1)\C#N
170	fluorouracil	BRD-K24844714	130	FDA	TYMS	pyrimidine analog; inhibitor of thymidylate synthase	196;276;385;422;447;476;478;479	Fc1c[nH]c(=O)[nH]c1=O
171	KU-55933	BRD-K25311561	66	probe	ATM	inhibitor of ataxia telangiectasia mutated (ATM)	77;263;407;430;457;461;467;475;479	O=c1cc(oc(c1)-c1cccc2Sc3ccccc3Sc12)N1CCOCC1
172	OSI-930	BRD-K25340465	66	clinical	KDR;KIT	inhibitor of c-KIT and VEGFR2	255;360;423;445;467;475;479	FC(F)(F)Oc1ccc(NC(=O)c2sccc2NCc2ccnc3ccccc23)cc1
173	CD-1530	BRD-K25737009	130	probe	RARG	agonist of retinoic acid receptor gamma	100;190;228;345;383;450;471;477	OC(=O)c1ccc(cc1)-c1ccc2cc(c(O)cc2c1)C12CC3CC(CC(C3)C1)C2
174	austocystin D	BRD-K25987073	37	probe		natural product; inducer of DNA damage	330;351;403;449;461;467;475;479	CC(C)(O)CCc1ccc(O)c2c1oc1cc3O[C@H]4OC=C[C@@]4(O)c3c(O)c1c2=O
175	BRD-K26531177	BRD-K26531177	330	probe		analog of the natural product piperlongumine	187;215;304;376;394;437;449;461;467;475;479	COc1cc(CCC(=O)N2CCC=CC2=O)cc(OC)c1OC
176	PD 153035	BRD-K26603252	33	probe	EGFR	inhibitor of EGFR	86;103;202;355;431;460;465;474;475;479	COc1cc2ncnc(Nc3cccc(Br)c3)c2cc1OC
177	cytochalasin B	BRD-K26664453	33	probe		inhibitor of actin polymerization	211;293;370;380;421;438;445;467;475;479	C[C@H]1[C@H]2[C@H](Cc3ccccc3)NC(=O)[C@]22OC(=O)\C=C\[C@H](O)CCC[C@@H](C)C\C=C\[C@H]2[C@H](O)C1=C
178	BIX-01294	BRD-K26818574	33	probe	EHMT2	inhibitor of G9a histone methyltransferase	69;164;310;371;430;457;461;467;475;479	COc1cc2nc(nc(NC3CCN(Cc4ccccc4)CC3)c2cc1OC)N1CCCN(C)CC1
179	BRD-K27224038	BRD-K27224038	66	GE-active		product of diversity oriented synthesis	95;109;191;321;354;435;459;473;478;479	C[C@@H](CO)N1C[C@H](C)[C@@H](CN(C)C(=O)C2CCOCC2)Oc2ncc(cc2C1=O)C#CC1(O)CCCC1
180	leptomycin B	BRD-K27624156	66	probe	XPO1	inhibitor of exportin 1	61;105;166;257;315;372;425;447;476;478;479	CCC(\C=C\[C@@H]1OC(=O)C=C[C@@H]1C)=C\[C@H](C)C\C=C\C(C)=C\[C@@H](C)C(=O)[C@@H](C)[C@H](O)[C@@H](C)C\C(C)=C\C(O)=O
181	lomeguatrib	BRD-K27955832	66	clinical	MGMT	inhibitor of methylguanine-DNA methyltransferase	178;373;433;451;454;470;474;475;479	Nc1nc(OCc2cc(Br)cs2)c2[nH]cnc2n1
182	BRD-K27986637	BRD-K27986637	66	probe		product of diversity oriented synthesis; screening hit	270;357;414;427;446;460;465;474;475;479	C[C@H](CO)N1C[C@H](C)[C@H](CN(C)Cc2ccc3OCCOc3c2)OCc2cn(CCCC1=O)nn2
183	TW-37	BRD-K28360340	33	probe	BCL2;BCL2L1	inhibitor of BCL2 and BCL-xL	122;237;327;391;418;442;456;466;469;472;476;478;479	CC(C)c1ccccc1Cc1cc(C(=O)Nc2ccc(cc2)S(=O)(=O)c2ccccc2C(C)(C)C)c(O)c(O)c1O
184	AZD4547	BRD-K28392481	66	clinical	FGFR1;FGFR2;FGFR3	inhibitor of fibroblast growth factor receptors	82;118;221;347;421;438;445;467;475;479	COc1cc(CCc2cc(NC(=O)c3ccc(cc3)N3C[C@H](C)N[C@H](C)C3)n[nH]2)cc(OC)c1
185	brivanib	BRD-K28428262	66	clinical	FLT1;KDR	inhibitor of VEGFR 1/2	275;361;384;429;468;477	C[C@@H](O)COc1cn2ncnc(Oc3ccc4[nH]c(C)cc4c3F)c2c1C
186	BRD-K28456706	BRD-K28456706	66	probe	HNF4A	inhibitor of hepatocyte nuclear factor 4 alpha	269;376;394;437;449;461;467;475;479	Cc1c(oc2ccc3ccccc3c12)[N+]([O-])=O
187	CD-437	BRD-K28907958	37	probe	RARG	agonist of retinoic acid receptor gamma	15;90;116;184;312;404;423;445;467;475;479	OC(=O)c1ccc2cc(ccc2c1)-c1ccc(O)c(c1)C12CC3CC(CC(C3)C1)C2
188	BRD-K29086754	BRD-K29086754	66	GE-active		product of diversity oriented synthesis	334;414;427;446;460;465;474;475;479	C[C@H](CO)N1C[C@@H](C)[C@@H](CN(C)Cc2ccc(cc2)C(O)=O)Oc2ccc(NC(=O)Nc3ccc(F)cc3)cc2CC1=O
189	BRD-K29313308	BRD-K29313308	66	probe	HDAC3	inhibitor of HDAC3	115;324;402;453;466;469;472;476;478;479	CC(=O)Nc1ccc(cc1)C(=O)Nc1ccc(F)cc1N
190	PIK-93	BRD-K29395450	66	probe	PIK3CG	inhibitor of PI3K catalytic subunit gamma	134;284;380;421;438;445;467;475;479	CC(=O)Nc1nc(C)c(s1)-c1ccc(Cl)c(c1)S(=O)(=O)NCCO
191	chlorambucil	BRD-K29458283	270	FDA		DNA alkylator	73;129;184;312;404;423;445;467;475;479	OC(=O)CCCc1ccc(cc1)N(CCCl)CCCl
192	NSC30930	BRD-K29711668	66	probe	SRD5A2	inhibitor of steroid 5-alpha reductase	235;387;412;434;454;470;474;475;479	OC(=O)c1cc2cc(OCc3ccccc3)ccc2[nH]1
193	axitinib	BRD-K29905972	66	FDA	FLT1;FLT3;KDR;KIT;PDGFRA;PDGFRB	inhibitor of VEGFRs, c-KIT, and PDGFR alpha and beta	44;91;181;221;347;421;438;445;467;475;479	CNC(=O)c1ccccc1Sc1ccc2c(\C=C\c3ccccn3)n[nH]c2c1
194	KX2-391	BRD-K29968218	66	clinical	SRC	peptide mimetic; inhibitor of SRC activity in cells	9;10;19;39;50;75;85;199;227;336;358;372;425;447;476;478;479	O=C(Cc1ccc(cn1)-c1ccc(OCCN2CCOCC2)cc1)NCc1ccccc1
195	BRD-K30019337	BRD-K30019337	66	GE-active		product of diversity oriented synthesis	119;191;321;354;435;459;473;478;479	CC(C)NC(=O)N(C)C[C@H]1Oc2ccc(cc2C(=O)N(C[C@H]1C)[C@H](C)CO)N(C)C
196	Compound 1541A	BRD-K30064966	37	probe	CASP3;CASP6;CASP7	activators of executioner procaspases 3, 6, and 7	205;354;435;459;473;478;479	Oc1cccc2cc(C(=O)Nc3cccc(c3)-c3cn4ccccc4n3)c(=O)oc12
197	BRD-K30748066	BRD-K30748066	66	probe	CDK9	inhibitor of CDK9	401;425;447;476;478;479	Cc1c(sc(=O)n1C)-c1ccnc(Nc2ccc(cc2)N2CCNCC2)n1
198	VU0155056	BRD-K31406481	66	probe	PLD1;PLD2	inhibitor of phospholipase D1/D2	138;186;288;395;411;446;460;465;474;475;479	O=C(NCCN1CCC(CC1)n1c2ccccc2[nH]c1=O)c1ccc2ccccc2c1
199	ceranib-2	BRD-K31514534	66	probe	ACER1;ACER2;ACER3;ASAH1;ASAH2;ASAH2B	inhibitor of ceramidase activity	29;31;60;75;85;199;227;336;358;372;425;447;476;478;479	COc1ccc(\C=C\C(=O)c2c(-c3ccccc3)c3ccccc3[nH]c2=O)cc1
200	VER-155008	BRD-K32330832	37	probe	HSPA1A;HSPA1B;HSPA1L	inhibitor of HSP70	143;288;395;411;446;460;465;474;475;479	Nc1ncnc2n([C@@H]3O[C@H](COCc4ccc(cc4)C#N)[C@@H](O)[C@H]3O)c(NCc3ccc(Cl)c(Cl)c3)nc12
201	AGK-2	BRD-K32536677	33	probe	SIRT2	inhibitor of sirtuin 2	219;334;414;427;446;460;465;474;475;479	Clc1ccc(Cl)c(c1)-c1ccc(\C=C(/C#N)C(=O)Nc2cccc3ncccc23)o1
202	cytarabine hydrochloride	BRD-K33106058	66	FDA		inducer of DNA damage	25;116;184;312;404;423;445;467;475;479	Nc1ccn([C@@H]2O[C@H](CO)[C@@H](O)[C@@H]2O)c(=O)n1
203	BRD-K33199242	BRD-K33199242	67	GE-active		product of diversity oriented synthesis	219;334;414;427;446;460;465;474;475;479	CNC[C@@H]1Oc2ccc(cc2CC(=O)N(C[C@@H]1C)[C@@H](C)CO)N(C)C
204	tivantinib	BRD-K33379087	66	clinical	MET	inhibitor of MET; inhibitor of microtubule assembly	58;87;96;140;199;227;336;358;372;425;447;476;478;479	O=C1NC(=O)[C@H]([C@@H]1c1c[nH]c2ccccc12)c1cn2CCCc3cccc1c23
205	BRD-K33514849	BRD-K33514849	34	probe		screening hit	375;428;458;465;474;475;479	C[C@H](CO)N1C[C@@H](C)[C@H](CN(C)C(=O)Nc2ccc3OCOc3c2)Oc2cc(ccc2S1(=O)=O)C#Cc1ccncc1
206	isoliquiritigenin	BRD-K33583600	33	probe		natural product	393;416;455;464;469;472;476;478;479	Oc1ccc(cc1)\C=C\C(=O)c1ccc(O)cc1O
207	clofarabine	BRD-K34022604	66	FDA		inducer of DNA damage	25;116;184;312;404;423;445;467;475;479	Nc1nc(Cl)nc2n(cnc12)[C@@H]1O[C@H](CO)[C@@H](O)[C@@H]1F
208	BRD-K34099515	BRD-K34099515	66	probe		screening hit	405;448;468;477	CC(C)N1C[C@@H](C)[C@H](CN(C)Cc2ccc(Oc3ccccc3)cc2)Oc2c(NC(=O)c3ccncc3)cccc2C1=O
209	cimetidine	BRD-K34157611	270	FDA	HRH2	inhibitor of histidine receptor H2	364;406;456;466;469;472;476;478;479	CN\C(NCCSCc1nc[nH]c1C)=N/C#N
210	BRD-K34222889	BRD-K34222889	66	probe		analog of the natural product piperlongumine	54;70;120;159;215;304;376;394;437;449;461;467;475;479	COc1ccc(cc1)C#CC1=CCCN(C(=O)\C=C\c2cc(OC)c(OC)c(OC)c2)C1=O
211	BRD-K34485477	BRD-K34485477	33	GE-active		product of diversity oriented synthesis	253;342;463;473;478;479	CNC[C@@H]1Oc2ccc(NC(=O)CCN3CCOCC3)cc2CC(=O)N(C[C@@H]1C)[C@H](C)CO
212	BMS-536924	BRD-K34581968	37	probe	IGF1R;INSR	inhibitor of insulin-like growth factor 1 receptor (IGF1R) and insulin receptor (INSR)	53;76;175;351;403;449;461;467;475;479	Cc1cc(cc2[nH]c(nc12)-c1c(NC[C@@H](O)c2cccc(Cl)c2)cc[nH]c1=O)N1CCOCC1
213	FQI-2	BRD-K35498412	33	probe		inhibitor of LSF1-mediated transcription	20;140;199;227;336;358;372;425;447;476;478;479	CCOc1ccccc1-c1cc(=O)[nH]c2cc3OCOc3cc12
214	dacarbazine	BRD-K35520305	66	FDA		DNA alkylator	276;385;422;447;476;478;479	CN(C)\N=N\c1[nH]cnc1C(N)=O
215	BRD-K35604418	BRD-K35604418	270	probe	MCL1	inhibitor of MCL1	299;344;410;438;445;467;475;479	Cc1cs\c(=N/C2CCCCC2)n1\N=C\c1ccc(O)c(O)c1O
216	ouabain	BRD-K35708212	270	probe	ATP1A1;ATP1A2;ATP1A3;ATP1A4;ATP1B1;ATP1B2;ATP1B3;ATP1B4	cardiac glycoside; inhibitor of the Na+/K+-ATPase	278;336;358;372;425;447;476;478;479	C[C@@H]1O[C@@H](O[C@H]2C[C@@H](O)[C@]3(CO)[C@H]4[C@H](O)C[C@]5(C)[C@H](CC[C@]5(O)[C@@H]4CC[C@]3(O)C2)C2=CC(=O)OC2)[C@H](O)[C@H](O)[C@H]1O
217	BRD6340	BRD-K35716340	33	probe		screening hit	320;400;441;459;473;478;479	C(Cn1c2ccccc2c2ccccc12)c1nc2ccccc2[nH]1
218	darinaparsin	BRD-K35723520	33	clinical		inducer of ROS; inhibitor of microtubule assembly	353;399;444;472;476;478;479	C[As](C)SC[C@H](NC(=O)CC[C@H](N)C(O)=O)C(=O)NCC(O)=O
219	niclosamide	BRD-K35960502	33	FDA	STAT3	inhibitor of STAT3 signaling	236;350;386;409;450;471;477	Oc1ccc(Cl)cc1C(=O)Nc1ccc(cc1Cl)[N+]([O-])=O
220	KU-60019	BRD-K36016295	66	probe	ATM	inhibitor of ataxia telangiectasia mutated (ATM)	77;263;407;430;457;461;467;475;479	C[C@H]1CN(CC(=O)Nc2ccc3Sc4c(Cc3c2)cccc4-c2cc(=O)cc(o2)N2CCOCC2)C[C@@H](C)O1
221	I-BET151	BRD-K36363294	66	probe	BRD2;BRD3;BRD4	inhibitor of bromodomain (BRD) and extra-C terminal domain (BET) proteins	14;22;125;328;374;403;449;461;467;475;479	COc1cc2c3n([C@H](C)c4ccccn4)c(=O)[nH]c3cnc2cc1-c1c(C)noc1C
222	StemRegenin 1	BRD-K36739687	66	probe	AHR	inhibitor of aryl hydrocarbon receptor	94;213;287;313;371;430;457;461;467;475;479	CC(C)n1cnc2c(NCCc3ccc(O)cc3)nc(nc12)-c1csc2ccccc12
223	NPC-26	BRD-K36852164	40	probe		induces cell death through a non-apoptotic, mitochondrial-dependent mechanism	167;322;345;383;450;471;477	CCOC(=O)c1c(NC(=O)c2ccc(s2)[N+]([O-])=O)sc2c1CC(C)(C)NC2(C)C
224	BRD-K37390332	BRD-K37390332	33	GE-active		product of diversity oriented synthesis	182;253;342;463;473;478;479	C[C@H](CO)N1C[C@H](C)[C@@H](CN(C)C(=O)Nc2cccc3ccccc23)Oc2ccc(NC(=O)c3ccncc3)cc2CC1=O
225	SB-525334	BRD-K37720887	66	probe	TGFBR1	inhibitor of the transforming growth factor beta type 1 receptor	273;381;418;442;456;466;469;472;476;478;479	Cc1cccc(n1)-c1[nH]c(nc1-c1ccc2nccnc2c1)C(C)(C)C
226	PF-3758309	BRD-K37764012	66	probe	PAK4	inhibitor of serine/threonine p21-activating kinase 4	114;257;315;372;425;447;476;478;479	CN(C)C[C@@H](NC(=O)N1Cc2c(Nc3nc(C)nc4ccsc34)n[nH]c2C1(C)C)c1ccccc1
227	etoposide	BRD-K37798499	28	FDA	TOP2A	inhibitor of topoisomerase II	42;72;224;240;312;404;423;445;467;475;479	COc1cc(cc(OC)c1O)[C@H]1[C@@H]2[C@H](COC2=O)[C@H](O[C@@H]2O[C@@H]3CO[C@@H](C)O[C@H]3[C@H](O)[C@H]2O)c2cc3OCOc3cc12
228	LY-2183240	BRD-K37865504	33	probe	FAAH	inhibitor of fatty acid amide hydrolase; inhibitor of anandamide uptake	85;199;227;336;358;372;425;447;476;478;479	CN(C)C(=O)n1nnnc1Cc1ccc(cc1)-c1ccccc1
229	nakiterpiosin	BRD-K38264551	33	probe		natural product; inhibitor of microtubule assembly	26;29;31;60;75;85;199;227;336;358;372;425;447;476;478;479	C[C@H]1C[C@@H](OC1=O)[C@@H](O)[C@@H](C(Cl)Cl)c1ccc2[C@@H]3C[C@@H](Br)[C@]45O[C@H](C[C@]4(C)[C@H]3C(=O)c2c1C)CO[C@H]5O
230	ML031	BRD-K38985961	530	probe	S1PR2	inhibitor of sphingosine 1-phosphate receptor 2	113;338;363;462;471;477	Cc1cc(C(=O)CN2C(=O)CCC2=O)c(C)n1Cc1ccccc1
231	NSC19630	BRD-K39706510	66	probe	WRN	inhibitor of Werner syndrome helicase activity	261;362;396;439;457;461;467;475;479	CCC(=O)OCN1C(=O)C=CC1=O
232	lenvatinib	BRD-K39974922	66	FDA	FLT1;FLT3;KDR;KIT;PDGFRA;PDGFRB	inhibitor of VEGFRs, c-KIT, and PDGFR alpha and beta	52;181;221;347;421;438;445;467;475;479	COc1cc2nccc(Oc3ccc(NC(=O)NC4CC4)c(Cl)c3)c2cc1C(N)=O
233	NSC 74859	BRD-K40853697	530	probe	STAT3	inhibitor of STAT3	152;332;402;453;466;469;472;476;478;479	Cc1ccc(cc1)S(=O)(=O)OCC(=O)Nc1ccc(C(O)=O)c(O)c1
234	BRD-K41334119	BRD-K41334119	66	GE-active		product of diversity oriented synthesis	109;191;321;354;435;459;473;478;479	CNC[C@@H]1Oc2ccc(NS(C)(=O)=O)cc2CC(=O)N(C[C@@H]1C)[C@H](C)CO
235	BRD-K41597374	BRD-K41597374	67	GE-active		product of diversity oriented synthesis	89;214;357;414;427;446;460;465;474;475;479	C[C@H](CO)N1C[C@H](C)[C@H](CN(C)C(=O)Nc2cc(F)ccc2F)Oc2cc(ccc2S1(=O)=O)C#CC1CCCC1
236	palmostatin B	BRD-K42137908	66	probe	LYPLA1	inhibitor of acyl-protein thioesterase 1	110;399;444;472;476;478;479	CCCCCCCCCC[C@H]1[C@H](CCc2ccc(OC)c(OC)c2)OC1=O
237	BRD-K42260513	BRD-K42260513	66	probe	EZH2	inhibitor of enhancer of zeste polycomb repressive complex 2 subunit	314;441;459;473;478;479	CC(C)n1ncc2c(cc(cc12)-c1ccc(nc1)N1CCNCC1)C(=O)NCc1c(C)cc(C)[nH]c1=O
238	sunitinib	BRD-K42828737	66	FDA	FLT1;FLT3;KDR;KIT;PDGFRA;PDGFRB	inhibitor of VEGFRs, c-KIT, and PDGFR alpha and beta	118;221;347;421;438;445;467;475;479	CCN(CC)CCNC(=O)c1c(C)[nH]c(\C=C2/C(=O)Nc3ccc(F)cc23)c1C
239	myricetin	BRD-K43149758	66	probe		flavonoid antioxidant	157;212;316;368;429;468;477	Oc1cc(O)c2c(c1)oc(-c1cc(O)c(O)c(O)c1)c(O)c2=O
240	SNS-032	BRD-K43389698	66	clinical	CDK16;CDK17;CDK2;CDK7;CDK9;CDKL5	inhibitor of cyclin-dependent kinases	48;105;166;257;315;372;425;447;476;478;479	CC(C)(C)c1cnc(CSc2cnc(NC(=O)C3CCNCC3)s2)o1
241	MLN2480	BRD-K43410529	66	clinical	ARAF;BRAF;RAF1	inhibitor of RAF kinases	283;420;455;464;469;472;476;478;479	C[C@@H](NC(=O)c1ncnc(N)c1Cl)c1ncc(s1)C(=O)Nc1cc(c(Cl)cn1)C(F)(F)F
242	PF-4800567 hydrochloride	BRD-K43428468	66	probe	CSNK1D;CSNK1E	inhibitor of casein kinase isoforms delta and epsilon	185;244;400;441;459;473;478;479	Nc1ncnc2n(nc(COc3cccc(Cl)c3)c12)C1CCOCC1
243	WP1130	BRD-K43644456	66	probe	UCHL5;USP14;USP5;USP9X	inhibitor of the deubiquitinase activity of USP9X, USP5, USP14, and UCH37	193;294;383;450;471;477	CCC[C@H](NC(=O)C(=C\c1cccc(Br)n1)\C#N)c1ccccc1
244	BRD-K44224150	BRD-K44224150	34	GE-active		product of diversity oriented synthesis	182;253;342;463;473;478;479	CNC[C@@H]1Oc2ccc(NC(=O)C3CCCCC3)cc2C(=O)N(C[C@@H]1C)[C@@H](C)CO
245	ML083	BRD-K44241590	37	probe	PKM	activator of muscle pyruvate kinase	203;339;389;463;473;478;479	COc1ccc(cc1)S(=O)(=O)N1CCN(CC1)S(=O)(=O)c1ccc2OCCOc2c1
246	pandacostat	BRD-K44741158	33	probe	HDAC1;HDAC2;HDAC3;HDAC6;HDAC8	inhibitor of HDAC1, HDAC2, HDAC3, HDAC6, and HDAC8	185;244;400;441;459;473;478;479	ONC(=O)\C=C\c1ccc(cc1)C(=O)N\N=C\c1ccc(O)c(O)c1O
247	ELCPK	BRD-K44847641	0.4	probe		screening hit	96;140;199;227;336;358;372;425;447;476;478;479	O=S(=O)(N1CCCc2ccccc12)c1ccc(cc1)-c1cnc(o1)C1CC1
248	betulinic acid	BRD-K45401373	66	probe		natural product; inhibitor of specificity protein 1 transcription factor in cells	167;322;345;383;450;471;477	CC(=C)[C@@H]1CC[C@@]2(CC[C@]3(C)[C@H](CC[C@@H]4[C@@]5(C)CC[C@H](O)C(C)(C)[C@@H]5CC[C@@]34C)[C@@H]12)C(O)=O
249	BRD-K45681478	BRD-K45681478	66	probe		product of diversity oriented synthesis; screening hit	269;376;394;437;449;461;467;475;479	ClC1=C(NCC=C)C(=O)c2ccccc2C1=O
250	NSC48300	BRD-K45748132	66	probe	TASP1	inhibitor of threonine endopeptidase taspase 1	162;246;299;344;410;438;445;467;475;479	O[As](O)(=O)c1ccc(Cc2ccc(cc2)[As](O)(O)=O)cc1
251	IU1	BRD-K45841694	66	probe	USP14	inhibitor of the deubiquitinase activity of USP14	291;314;441;459;473;478;479	Cc1cc(C(=O)CN2CCCC2)c(C)n1-c1ccc(F)cc1
252	BMS-195614	BRD-K45935533	66	probe	RARA;RARB;RARG	antagonist of retinoic acid receptors	148;309;373;433;451;454;470;474;475;479	CC1(C)CC=C(c2cnc3ccccc3c2)c2cc(ccc12)C(=O)Nc1ccc(cc1)C(O)=O
253	CIL55	BRD-K46556387	10	probe		screening hit	142;205;354;435;459;473;478;479	CN(C)CCNC(=O)c1cc2CSc3cc(Cl)ccc3-c2s1
254	Ki8751	BRD-K47150025	66	probe	KDR;KIT;PDGFRA	inhibitor of VEGFR2, c-KIT, and PDGFRA	44;91;181;221;347;421;438;445;467;475;479	COc1cc2nccc(Oc3ccc(NC(=O)Nc4ccc(F)cc4F)c(F)c3)c2cc1OC
255	GMX-1778	BRD-K47335880	0.3	clinical	NAMPT	inhibitor of nicotinamide phosphoribosyltransferase	43;217;385;422;447;476;478;479	Clc1ccc(OCCCCCC\N=C(\NC#N)Nc2ccncc2)cc1
256	Repligen 136	BRD-K47503321	66	probe	HDAC3	inhibitor of HDAC3	360;423;445;467;475;479	Cc1ccc(cc1)C(=O)NCCCCCC(=O)Nc1ccc(F)cc1N
257	SR1001	BRD-K47981327	66	probe	RORA;RORC	synthetic ROR ligand; suppressor of TH17 differentiation	309;373;433;451;454;470;474;475;479	CC(=O)Nc1nc(C)c(s1)S(=O)(=O)Nc1ccc(cc1)C(O)(C(F)(F)F)C(F)(F)F
258	BRD-K48334597	BRD-K48334597	66	GE-active		product of diversity oriented synthesis	270;357;414;427;446;460;465;474;475;479	C[C@H](CO)N1C[C@H](C)[C@@H](CN(C)C(=O)NC2CCCCC2)Oc2ccc(NC(=O)Cc3cn(C)c4ccccc34)cc2C1=O
259	BRD-K48477130	BRD-K48477130	66	probe		screening hit	258;390;415;448;468;477	Cc1n[nH]c2NC3=C([C@@H](c12)c1ccccc1)C(=O)CC(C)(C)C3
260	nintedanib	BRD-K49075727	66	clinical	FGFR1;FGFR2;FGFR3;FLT1;FLT3;KDR;PDGFRA;PDGFRB	inhibitor of c-KIT, VEGFRs, PDGFRs, and FGFRs	176;292;301;347;421;438;445;467;475;479	COC(=O)c1ccc2c(NC(=O)\C2=C(/Nc2ccc(cc2)N(C)C(=O)CN2CCN(C)CC2)c2ccccc2)c1
261	GSK2636771	BRD-K49215523	66	clinical	PIK3CB	inhibitor of PI3K catalytic subunit beta	341;388;436;470;474;475;479	Cc1nc2c(cc(cc2n1Cc1cccc(c1C)C(F)(F)F)N1CCOCC1)C(O)=O
262	BRD-K49290616	BRD-K49290616	66	GE-active		product of diversity oriented synthesis	308;382;434;454;470;474;475;479	OC[C@@H]1O[C@@H](CC(=O)NCc2ccncn2)CC[C@H]1NC(=O)c1ccc(F)cc1
263	dasatinib	BRD-K49328571	66	FDA	EPHA2;KIT;LCK;SRC;YES1	inhibitor of SRC, YES1, EPHA2, c-KIT, and LCK	34;169;355;431;460;465;474;475;479	Cc1nc(Nc2ncc(s2)C(=O)Nc2c(C)cccc2Cl)cc(n1)N1CCN(CCO)CC1
264	PRIMA-1-Met	BRD-K49456190	33	probe	TP53	re-activator of the pro-apoptotic activity of mutant p53	290;341;388;436;470;474;475;479	COC[C@]1(CO)[N@@]2CC[C@@H](CC2)C1=O
265	abiraterone	BRD-K50071428	17	FDA	CYP17A1	inhibitor of 17 alpha-hydroxylase and C17,20 lyase	259;265;405;448;468;477	C[C@]12CC[C@H]3[C@@H](CC=C4C[C@@H](O)CC[C@]34C)[C@@H]1CC=C2c1cccnc1
266	sildenafil	BRD-K50128260	530	FDA	PDE5A	inhibitor of phosphodiesterase 5A	209;335;389;463;473;478;479	CCCc1nn(C)c2C(=O)NC(=Nc12)c3cc(ccc3OCC)S(=O)(=O)N4CCN(C)CC4
267	NVP-TAE684	BRD-K50140147	66	probe	ALK	inhibitor of ALK and ALK-NPM fusion protein	76;175;351;403;449;461;467;475;479	COc1cc(ccc1Nc1ncc(Cl)c(Nc2ccccc2S(=O)(=O)C(C)C)n1)N1CCC(CC1)N1CCN(C)CC1
268	necrostatin-7	BRD-K50145167	66	probe		inhibitor of necroptosis	251;339;389;463;473;478;479	Fc1ccc(cc1)-c1n[nH]cc1C=C1SC(=N)N(C1=O)c1nccs1
269	canertinib	BRD-K50168500	66	clinical	EGFR;ERBB2	inhibitor of EGFR and HER2	47;59;79;102;168;202;355;431;460;465;474;475;479	Fc1ccc(Nc2ncnc3cc(OCCCN4CCOCC4)c(NC(=O)C=C)cc23)cc1Cl
270	HBX-41108	BRD-K50501969	66	probe	USP7	inhibitor of the deubiquitinase activity of USP7	234;295;394;437;449;461;467;475;479	Clc1ccc-2c(c1)C(=O)c1nc(C#N)c(nc-21)C#N
271	BRD-K50799972	BRD-K50799972	66	GE-active		product of diversity oriented synthesis	135;343;413;444;472;476;478;479	COc1ccccc1-c1cccc(c1)-c1nc(cc2CN([C@@H](CCO)c12)[S@@](=O)C(C)(C)C)C(=O)NCc1ccncc1
272	BRD-K51490254	BRD-K51490254	66	probe	HDAC6;HDAC8	inhibitor of HDAC6 and HDAC8	131;326;363;462;471;477	ONC(=O)c1cccc(c1)C(=O)Nc1ccccc1
273	cabozantinib	BRD-K51544265	66	FDA	FLT3;KDR;MET;RET	inhibitor of c-MET, VEGFR2/3, and RET	40;126;292;301;347;421;438;445;467;475;479	COc1cc2nccc(Oc3ccc(NC(=O)C4(CC4)C(=O)Nc4ccc(F)cc4)cc3)c2cc1OC
274	TPCA-1	BRD-K51575138	66	probe	IKBKB	inhibitor of IKK-2	146;245;323;404;423;445;467;475;479	NC(=O)Nc1sc(cc1C(N)=O)-c1ccc(F)cc1
275	CAY10576	BRD-K51781482	66	probe	IKBKE	inhibitor of IKK-epsilon	321;354;435;459;473;478;479	COc1cc2ncn(-c3cc(OCc4ccccc4S(C)(=O)=O)c(s3)C#N)c2cc1OC
276	BRD-K51831558	BRD-K51831558	66	probe	EZH2	inhibitor of enhancer of zeste polycomb repressive complex 2 subunit	241;388;436;470;474;475;479	CC(C)n1ncc2c(cc(Br)cc12)C(=O)NCc1c(C)cc(C)[nH]c1=O
277	BRD-K52037352	BRD-K52037352	66	GE-active		product of diversity oriented synthesis	170;214;357;414;427;446;460;465;474;475;479	C[C@@H](CO)N1C[C@H](C)[C@H](CN(C)C(=O)Nc2cccc3ccccc23)Oc2ccc(NC(=O)NC3CCCCC3)cc2CC1=O
278	cerulenin	BRD-K52075040	150	probe	FASN;HMGCS1	inhibitor of fatty acid synthase; inhibitor of HMG-CoA synthase	54;70;120;159;215;304;376;394;437;449;461;467;475;479	C\C=C\C\C=C\CCC(=O)[C@H]1O[C@H]1C(N)=O
279	tacedinaline	BRD-K52313696	33	probe	HDAC1;HDAC2;HDAC3;HDAC6;HDAC8	inhibitor of HDAC1, HDAC2, HDAC3, HDAC6, and HDAC8	238;297;392;439;457;461;467;475;479	CC(=O)Nc1ccc(cc1)C(=O)Nc1ccccc1N
280	methylstat	BRD-K52560704	66	probe	KDM3A;KDM4A;KDM4B;KDM4C;KDM4D	inhibitor of lysine specific demethylases	159;215;304;376;394;437;449;461;467;475;479	COC(=O)\C=C\C(=O)N(O)CCCCNCc1ccc(COC(=O)Nc2cccc3ccccc23)cc1
281	AZD7545	BRD-K52836380	74	probe	PDK2	inhibitor of pyruvate dehydrogenase kinase 2	152;332;402;453;466;469;472;476;478;479	CN(C)C(=O)c1ccc(cc1)S(=O)(=O)c1ccc(NC(=O)[C@@](C)(O)C(F)(F)F)c(Cl)c1
282	GDC-0941	BRD-K52911425	66	clinical	PIK3CA;PIK3CB;PIK3CD;PIK3CG	inhibitor of PI3K kinase activity	46;80;107;134;284;380;421;438;445;467;475;479	CS(=O)(=O)N1CCN(Cc2cc3nc(nc(N4CCOCC4)c3s2)-c2cccc3[nH]ncc23)CC1
283	JW-55	BRD-K53328210	66	probe	TNKS	inhibitor of tankyrase	218;241;388;436;470;474;475;479	COc1ccc(cc1)C1(CNC(=O)c2ccc(NC(=O)c3ccco3)cc2)CCOCC1
284	tivozanib	BRD-K53414658	33	clinical	FLT1;FLT3;KDR	inhibitor of VEGFRs	91;181;221;347;421;438;445;467;475;479	COc1cc2nccc(Oc3ccc(NC(=O)Nc4cc(C)on4)c(Cl)c3)c2cc1OC
285	BEC	BRD-K53792571	270	probe	ARG1;ARG2	inhibitor of arginase I and II	320;400;441;459;473;478;479	N[C@H](CSCCB(O)O)C(O)=O
286	SRT-1720	BRD-K53855319	37	probe	SIRT1	activator of sirtuin-1	248;356;432;451;454;470;474;475;479	O=C(Nc1cc(CN2CCNCC2)cc(c1)-c1nc2ccccc2[nH]1)c1cnc2ccccc2n1
287	neuronal differentiation inducer III	BRD-K53903639	270	probe		induction of rat HCN cell differentiation as judged by induction of neuronal reporter neuroD activity	285;392;439;457;461;467;475;479	O=C(NC1CC1)c1cc(on1)-c1cccs1
288	ruxolitinib	BRD-K53972329	66	FDA	JAK1;JAK2	inhibitor of Janus kinases 1 and 2	323;404;423;445;467;475;479	N#CC[C@H](C1CCCC1)n1cc(cn1)-c1ncnc2[nH]ccc12
289	MK-1775	BRD-K54256913	33	clinical	WEE1	inhibitor of WEE1	121;242;272;315;372;425;447;476;478;479	CN1CCN(CC1)c1ccc(Nc2ncc3c(n2)n(-c2cccc(n2)C(C)(C)O)n(CC=C)c3=O)cc1
290	JQ-1	BRD-K54606188	66	probe	BRDT	inhibitor of bromodomain (BRD) and extra-C terminal domain (BET) proteins	22;125;328;374;403;449;461;467;475;479	Cc1sc-2c(c1C)C(=N[C@@H](CC(=O)OC(C)(C)C)c1nnc(C)n-21)c1ccc(Cl)cc1
291	WAY-362450	BRD-K54640016	66	probe	NR1H4	agonist of farnesoid X receptor	247;318;366;440;458;465;474;475;479	CC(C)OC(=O)C1=CN(CC(C)(C)c2c1[nH]c1ccccc21)C(=O)c1ccc(F)c(F)c1
292	BYL-719	BRD-K54997624	66	clinical	PIK3CA	inhibitor of PI3K catalytic subunit alpha	101;200;284;380;421;438;445;467;475;479	Cc1nc(NC(=O)N2CCC[C@H]2C(N)=O)sc1-c1ccnc(c1)C(C)(C)C(F)(F)F
293	BRD-K55116708	BRD-K55116708	66	probe		product of diversity oriented synthesis; inhibitor of leukemic stem cells	135;343;413;444;472;476;478;479	C[C@@H](CO)N1C[C@@H](C)[C@@H](CN(C)Cc2ccc(cc2)C(=O)Nc2ccccc2N)Oc2c(NC(=O)Nc3ccccc3)cccc2C1=O
294	SZ4TA2	BRD-K55125219	66	probe	BCL2L1	inhibitor of BCL-xL	83;226;340;398;440;458;465;474;475;479	CC1(C)CCN(CC1)c1ccc(cc1)C(=O)NS(=O)(=O)c1ccc(NCCSc2ccccc2)c(c1)[N+]([O-])=O
295	rigosertib	BRD-K55187425	66	clinical	PIK3CA;PIK3CB;PLK1	inhibitor of polo-like kinase 1; inhibitor of PI3K catalytic subunits alpha and beta	18;31;60;75;85;199;227;336;358;372;425;447;476;478;479	COc1cc(OC)c(\C=C\S(=O)(=O)Cc2ccc(OC)c(NCC(O)=O)c2)c(OC)c1
296	isonicotinohydroxamic acid	BRD-K55478147	33	probe	HDAC6	inhibitor of HDAC6	208;305;384;429;468;477	ONC(=O)c1ccncc1
297	epigallocatechin-3-monogallate	BRD-K55591206	300	probe		natural product	248;356;432;451;454;470;474;475;479	Oc1cc(O)c2C[C@@H](OC(=O)c3cc(O)c(O)c(O)c3)[C@H](Oc2c1)c1cc(O)c(O)c(O)c1
298	topotecan	BRD-K55696337	66	FDA	TOP1	inhibitor of topoisomerase I	12;73;129;184;312;404;423;445;467;475;479	CC[C@@]1(O)C(=O)OCc2c1cc1-c3nc4ccc(O)c(CN(C)C)c4cc3Cn1c2=O
299	MGCD-265	BRD-K56277358	66	clinical	FLT1;FLT3;KDR;MET	inhibitor of c-MET and VEGFRs	126;292;301;347;421;438;445;467;475;479	Cn1cnc(c1)-c1cc2nccc(Oc3ccc(NC(=S)NC(=O)Cc4ccccc4)cc3F)c2s1
300	ABT-737	BRD-K56301217	37	clinical	BCL2;BCL2L1;BCL2L2	inhibitor of BCL2, BCL-xL, and BCL-W	28;229;369;417;437;449;461;467;475;479	CN(C)CC[C@H](CSc1ccccc1)Nc1ccc(cc1[N+]([O-])=O)S(=O)(=O)NC(=O)c1ccc(cc1)N1CCN(Cc2ccccc2-c2ccc(Cl)cc2)CC1
301	PLX-4032	BRD-K56343971	33	FDA	BRAF	inhibitor of BRAF	408;453;466;469;472;476;478;479	CCCS(=O)(=O)Nc1ccc(F)c(C(=O)c2c[nH]c3ncc(cc23)-c2ccc(Cl)cc2)c1F
302	selumetinib	BRD-K57080016	270	clinical	MAP2K1;MAP2K2	inhibitor of MEK1 and MEK2	1;33;348;436;470;474;475;479	Cn1cnc2c(F)c(Nc3ccc(Br)cc3Cl)c(cc12)C(=O)NOCCO
303	marinopyrrole A	BRD-K57261999	66	probe	MCL1	natural product; putative inhibitor of MCL1	303;362;396;439;457;461;467;475;479	Oc1ccccc1C(=O)c1[nH]c(Cl)c(Cl)c1-n1c(cc(Cl)c1Cl)C(=O)c1ccccc1O
304	AT13387	BRD-K58435339	66	clinical	HSP90AA1	inhibitor of HSP90	127;358;372;425;447;476;478;479	CC(C)c1cc(C(=O)N2Cc3ccc(CN4CCN(C)CC4)cc3C2)c(O)cc1O
305	daporinad	BRD-K58550667	2	clinical	NAMPT	inhibitor of nicotinamide phosphoribosyltransferase	3;16;43;217;385;422;447;476;478;479	O=C(NCCCCC1CCN(CC1)C(=O)c1ccccc1)\C=C\c1cccnc1
306	AZD6482	BRD-K58772419	66	clinical	PIK3CB;PIK3CD	inhibitor of PI3K catalytic subunits beta and delta	97;281;431;460;465;474;475;479	C[C@@H](Nc1ccccc1C(O)=O)c1cc(C)cn2c1nc(cc2=O)N1CCOCC1
307	AZ-3146	BRD-K59146805	66	probe	TTK	inhibitor of TTK protein kinase	163;331;410;438;445;467;475;479	COc1cc(OC2CCN(C)CC2)ccc1Nc1ncc2n(C)c(=O)n(C3CCCC3)c2n1
308	DBeQ	BRD-K59204667	66	probe	VCP	inhibitor of p97 in cells	225;262;338;363;462;471;477	C(Nc1nc(NCc2ccccc2)c2ccccc2n1)c1ccccc1
309	VX-680	BRD-K59369769	66	clinical	AURKA;AURKB;AURKC	inhibitor of aurora kinases	352;416;455;464;469;472;476;478;479	CN1CCN(CC1)c1cc(Nc2cc(C)[nH]n2)nc(Sc2ccc(NC(=O)C3CC3)cc2)n1
310	bardoxolone methyl	BRD-K59437938	66	clinical		electrophilic inducer of the NFE2L2-KEAP1 pathway	296;350;386;409;450;471;477	COC(=O)[C@@]12CCC(C)(C)C[C@@H]1[C@@H]1C(=O)C=C3[C@]4(C)C=C(C#N)C(=O)C(C)(C)[C@H]4CC[C@]3(C)[C@@]1(C)CC2
311	methotrexate	BRD-K59456551	66	FDA	DHFR	inhibitor of dihydrofolate reductase	201;422;447;476;478;479	CN(Cc1cnc2nc(N)nc(N)c2n1)c1ccc(cc1)C(=O)N[C@@H](CCC(O)=O)C(O)=O
312	mitomycin	BRD-K59670716	50	FDA		DNA crosslinker	36;90;116;184;312;404;423;445;467;475;479	CO[C@]12[C@H]3N[C@H]3CN1C1=C([C@H]2COC(N)=O)C(=O)C(N)=C(C)C1=O
313	ML029	BRD-K59962020	33	probe		inhibitor of antigen receptor-mediated NFkappaB activity	274;367;417;437;449;461;467;475;479	Cc1cc2nc(NCCCO)n(CC(=O)c3cc(c(O)c(c3)C(C)(C)C)C(C)(C)C)c2cc1C
314	serdemetan	BRD-K60219430	33	clinical	MDM2	inhibitor of MDM2	165;252;328;374;403;449;461;467;475;479	C(Cc1c[nH]c2ccccc12)Nc1cccc(Nc2ccncc2)c1
315	MG-132	BRD-K60230970	20	probe	PSMB1;PSMB2;PSMB5;PSMD1;PSMD2	inhibitor of the proteosome	171;379;401;425;447;476;478;479	CC(C)C[C@H](NC(=O)[C@H](CC(C)C)NC(=O)[C@H](CC(C)C)NC(=O)OCc1ccccc1)C=O
316	PYR-41	BRD-K60750172	66	probe	UBA1	inhibitor of ubiquitin-activating enzyme in cells	268;326;363;462;471;477	CCOC(=O)c1ccc(cc1)N1NC(=O)C(=Cc2ccc(o2)[N+]([O-])=O)C1=O
317	CAL-101	BRD-K60866521	66	clinical	PIK3CD	inhibitor of PI3K catalytic subunit delta	84;97;281;431;460;465;474;475;479	CC[C@H](Nc1ncnc2[nH]cnc12)c1nc2cccc(F)c2c(=O)n1-c1ccccc1
318	Mdivi-1	BRD-K61128465	66	probe	DNM1	inhibitor of dynamin 1; inhibitor of mitrochondrial division inhibitor	163;331;410;438;445;467;475;479	COc1cc(c(Cl)cc1Cl)-n1c(=S)[nH]c2ccccc2c1=O
319	BRD-K61166597	BRD-K61166597	66	probe		inhibitor of HDAC1 and HDAC2	23;66;93;155;238;297;392;439;457;461;467;475;479	Nc1ccc(cc1NC(=O)c1ccc(cc1)C(=O)NCCc1ccncc1)-c1cccs1
320	SB-225002	BRD-K61323504	37	probe	CXCR2	inhibitor of chemokine receptor 2	35;60;75;85;199;227;336;358;372;425;447;476;478;479	Oc1cc(ccc1NC(=O)Nc1ccccc1Br)[N+]([O-])=O
321	CAY10594	BRD-K61662457	66	probe	PLD2	inhibitor of phospholipase D2	294;383;450;471;477	O=C(NCCN1CCC2(CC1)N(CNC2=O)c1ccccc1)c1ccc2ccccc2c1
322	Compound 7d-cis	BRD-K61829047	33	probe	XPO1	inhibitor of CRM1-mediated nucleocytoplasmic transport	130;192;282;356;432;451;454;470;474;475;479	CCOC(=O)\C=C/n1nnc(n1)-c1cccc(Cl)c1
323	SB-743921	BRD-K62358710	33	clinical	KIF11	inhibitor of kinesin 11	24;39;50;75;85;199;227;336;358;372;425;447;476;478;479	CC(C)[C@H](N(CCCN)C(=O)c1ccc(C)cc1)c1oc2cc(Cl)ccc2c(=O)c1Cc1ccccc1
324	ABT-199	BRD-K62391742	66	clinical	BCL2	inhibitor of BCL2	229;369;417;437;449;461;467;475;479	CC1(C)CCC(CN2CCN(CC2)c2ccc(C(=O)NS(=O)(=O)c3ccc(NCC4CCOCC4)c(c3)[N+]([O-])=O)c(Oc3cnc4[nH]ccc4c3)c2)=C(C1)c1ccc(Cl)cc1
325	neopeltolide	BRD-K62479592	33	probe		inhibitor of cellular respiration	298;424;442;456;466;469;472;476;478;479	CCC[C@H]1C[C@H](C[C@H](C)C[C@@H]2C[C@H](C[C@H](CC(=O)O1)O2)OC(=O)\C=C/CCc1coc(\C=C/CNC(=O)OC)n1)OC
326	BRD1835	BRD-K62801835	130	probe	EZH2	product of diversity oriented synthesis; screening hit	232;306;331;410;438;445;467;475;479	C[C@@H](CO)N1C[C@H](C)[C@@H](CN(C)Cc2ccc(cc2)C(O)=O)Oc2cc(ccc2S1(=O)=O)C#CCC1CCCC1
327	BRD-K70511574	BRD-K62825658	66	probe	PLK1	inhibitor of polo-like kinase 1 (PLK1)	18;31;60;75;85;199;227;336;358;372;425;447;476;478;479	COc1ccc(cc1)S(=O)(=O)N(C(=O)C)c2ccccc2C=Cc3cc[n+]([O-])cc3
328	tipifarnib-P2	BRD-K62965247	33	probe	FNTA	inhibitor of farnesyltransferase	130;192;282;356;432;451;454;470;474;475;479	Cn1cncc1[C@@](N)(c1ccc(Cl)cc1)c1ccc2n(C)c(=O)cc(-c3cccc(Cl)c3)c2c1
329	ZSTK474	BRD-K63068307	66	clinical	PIK3CB;PIK3CD;PIK3CG	inhibitor of PI3K catalytic subunits beta, delta, and gamma	46;80;107;134;284;380;421;438;445;467;475;479	FC(F)c1nc2ccccc2n1-c1nc(nc(n1)N1CCOCC1)N1CCOCC1
330	tipifarnib-P1	BRD-K63195589	33	clinical	FNTA	inhibitor of farnesyltransferase	183;262;338;363;462;471;477	Cn1cncc1[C@](N)(c1ccc(Cl)cc1)c1ccc2n(C)c(=O)cc(-c3cccc(Cl)c3)c2c1
331	BRD-K63431240	BRD-K63431240	66	probe		product of diversity oriented synthesis; screening hit	180;325;396;439;457;461;467;475;479	C[C@@H](CO)N1C[C@H](C)[C@@H](CN(C)C(=O)Nc2ccc3OCOc3c2)Oc2cc(ccc2S1(=O)=O)C#Cc1ccncc1
332	barasertib	BRD-K63923597	66	clinical	AURKB	inhibitor of aurora kinase B	45;154;240;312;404;423;445;467;475;479	CCN(CCO)CCCOc1ccc2c(Nc3cc(CC(=O)Nc4cccc(F)c4)[nH]n3)ncnc2c1
333	gefitinib	BRD-K64052750	66	FDA	AKT1;EGFR	inhibitor of EGFR and AKT1	30;79;102;168;202;355;431;460;465;474;475;479	COc1cc2ncnc(Nc3ccc(F)c(Cl)c3)c2cc1OCCCN1CCOCC1
334	necrosulfonamide	BRD-K64117221	66	probe		inhibitor of downstream signaling of RIP3 associated with MLKL	295;394;437;449;461;467;475;479	COc1nccnc1NS(=O)(=O)c1ccc(NC(=O)\C=C\c2ccc(s2)[N+]([O-])=O)cc1
335	MI-1	BRD-K64497429	33	probe	MEN1	binder of menin; inhibitor of menin-MLL fusion protein	63;289;395;411;446;460;465;474;475;479	CC1(C)CN=C(S1)N1CCN(CC1)c1ncnc2sc3CCCCc3c12
336	apicidin	BRD-K64606589	33	probe	HDAC1;HDAC2;HDAC3;HDAC6;HDAC8	inhibitor of HDAC1, HDAC2, HDAC3, HDAC6, and HDAC8	38;62;93;155;238;297;392;439;457;461;467;475;479	CC[C@@H](C)[C@@H]1NC(=O)[C@H](Cc2cn(OC)c3ccccc23)NC(=O)[C@H](CCCCCC(=O)CC)NC(=O)[C@H]2CCCCN2C1=O
337	BRD-K64610608	BRD-K64610608	33	probe		product of diversity oriented synthesis; screening hit	157;212;316;368;429;468;477	COc1ccc(cc1)S(=O)(=O)N(C)C[C@@H]1Oc2c(NC(=O)Nc3cccc4ccccc34)cccc2C(=O)N(C[C@H]1C)[C@@H](C)CO
338	tretinoin	BRD-K64634304	130	FDA	RARA;RARB;RARG	agonist of retinoid acid receptors	74;210;300;349;377;427;446;460;465;474;475;479	CC(=CC=CC(=CC(=O)O)C)C=CC1=C(C)CCCC1(C)C
339	Ko-143	BRD-K64642496	130	probe	ABCG2	inhibitor of breast cancer resistance protein multidrug transporter (BCRP)	138;186;288;395;411;446;460;465;474;475;479	COc1ccc2c3C[C@@H]4N([C@@H](CC(C)C)c3[nH]c2c1)C(=O)[C@H](CCC(=O)OC(C)(C)C)NC4=O
340	TG-100-115	BRD-K64785675	66	clinical	PIK3CD;PIK3CG	inhibitor of PI3K catalytic subunits delta and gamma	281;431;460;465;474;475;479	Nc1nc(N)c2nc(-c3cccc(O)c3)c(nc2n1)-c1cccc(O)c1
341	PHA-793887	BRD-K64800655	66	clinical	CDK1;CDK2;CDK4;CDK5;CDK7;CDK9	inhibitor of cyclin-dependent kinases	48;105;166;257;315;372;425;447;476;478;479	CC(C)CC(=O)Nc1n[nH]c2c1CN(C(=O)C1CCN(C)CC1)C2(C)C
342	BI-2536	BRD-K64890080	33	clinical	PLK1	inhibitor of polo-like kinase 1 (PLK1)	7;50;75;85;199;227;336;358;372;425;447;476;478;479	CC[C@H]1N(C2CCCC2)c2nc(Nc3ccc(cc3OC)C(=O)NC3CCN(C)CC3)ncc2N(C)C1=O
343	semagacestat	BRD-K65592642	66	clinical	APH1A;NCSTN;PSEN1;PSENEN	inhibitor of gamma-secretase	178;373;433;451;454;470;474;475;479	CC(C)[C@H](O)C(=O)N[C@@H](C)C(=O)N[C@H]1c2ccccc2CCN(C)C1=O
344	AZD1480	BRD-K65928735	66	clinical	JAK1;JAK2	inhibitor of Janus kinases 1 and 2	274;367;417;437;449;461;467;475;479	C[C@H](Nc1ncc(Cl)c(Nc2cc(C)[nH]n2)n1)c1ncc(F)cn1
345	afatinib	BRD-K66175015	66	clinical	EGFR;ERBB2	inhibitor of EGFR and HER2	13;21;47;59;79;102;168;202;355;431;460;465;474;475;479	CN(C)C\C=C\C(=O)Nc1cc2c(Nc3ccc(F)c(Cl)c3)ncnc2cc1O[C@H]1CCOC1
346	KH-CB19	BRD-K66430217	17	probe	CLK1;CLK4	inhibitor of CDC2-like kinases 1 and 4	419;452;462;471;477	CCOC(=O)c1c(C(=CN)C#N)c2ccc(Cl)c(Cl)c2n1C
347	BRD-K66453893	BRD-K66453893	66	GE-active		product of diversity oriented synthesis	26;29;31;60;75;85;199;227;336;358;372;425;447;476;478;479	C[C@@H](CO)N1C[C@H](C)[C@H](CN(C)S(=O)(=O)c2ccc(Cl)cc2)Oc2ccc(NC(=O)CCC(F)(F)F)cc2CC1=O
348	BRD-K66532283	BRD-K66532283	66	probe	HDAC1;HDAC2	inhibitor of HDAC1 and HDAC2	156;297;392;439;457;461;467;475;479	Nc1ccc(cc1NC(=O)C1=CCCC1)-c1cccs1
349	pifithrin-alpha	BRD-K66874953	230	probe		inhibitor of p53-dependent signaling	286;386;409;450;471;477	Cc1ccc(cc1)C(=O)Cn1c2CCCCc2sc1=N
350	Compound 23 citrate	BRD-K67112618	33	probe		analog of natural product cortistatin	147;213;287;313;371;430;457;461;467;475;479	CN(C)[C@H]1CC[C@H]2[C@@H](CC[C@H]3[C@@H]4CC=C(c5ccc6cnccc6c5)[C@@]4(C)CC[C@H]23)C1
351	SB-431542	BRD-K67298865	66	probe	TGFBR1	inhibitor of the transforming growth factor beta type 1 receptor	254;419;452;462;471;477	NC(=O)c1ccc(cc1)-c1nc(c([nH]1)-c1ccccn1)-c1ccc2OCOc2c1
352	KU-0063794	BRD-K67566344	66	probe	MTOR	inhibitor of mTOR	27;68;153;370;380;421;438;445;467;475;479	COc1ccc(cc1CO)-c1ccc2c(nc(nc2n1)N1C[C@H](C)O[C@H](C)C1)N1CCOCC1
353	GDC-0879	BRD-K67578145	66	probe	BRAF	inhibitor of BRAF	177;283;420;455;464;469;472;476;478;479	OCCn1cc(c(n1)-c1ccncc1)-c1ccc2c(CC\C2=N/O)c1
354	pevonedistat	BRD-K67844266	37	clinical	NAE1	inhibitor of Nedd-8 activating enzyme	243;344;410;438;445;467;475;479	NS(=O)(=O)OC[C@@H]1C[C@H](C[C@@H]1O)n1ccc2c(N[C@H]3CCc4ccccc34)ncnc12
355	PI-103	BRD-K67868012	37	probe	MTOR;PIK3CA;PIK3CB;PIK3CD;PIK3CG;PRKDC	inhibitor of DNA-PK, PI3K p110 delta, mTORC1, and catalytic subunits of PI3K	161;260;374;403;449;461;467;475;479	Oc1cccc(c1)-c1nc(N2CCOCC2)c2oc3ncccc3c2n1
356	MK-2206	BRD-K68065987	33	clinical	AKT1	inhibitor of AKT1	80;107;134;284;380;421;438;445;467;475;479	NC1(CCC1)c1ccc(cc1)-c1nc2ccn3c(n[nH]c3=O)c2cc1-c1ccccc1
357	NSC95397	BRD-K68143200	33	probe	CDC25A;CDC25B;CDC25C	inhibitor of cell division cycle 25 phosphatase (CDC25)	123;187;215;304;376;394;437;449;461;467;475;479	OCCSC1=C(SCCO)C(=O)c2ccccc2C1=O
358	BRD8958	BRD-K68548958	66	probe	EP300	inhibitor of E1A binding protein p300	275;361;384;429;468;477	CC1=NN(C(=O)C\1=C\c1ccc(o1)-c1cc(C)c(C)cc1[N+]([O-])=O)c1ccc(cc1)C(O)=O
359	alvocidib	BRD-K68682020	66	clinical	CDK1;CDK2;CDK4;CDK6	inhibitor of cyclin-dependent kinases	11;145;166;257;315;372;425;447;476;478;479	CN1CC[C@H]([C@H](O)C1)c1c(O)cc(O)c2c1oc(cc2=O)-c1ccccc1Cl
360	tacrolimus	BRD-K69608737	74	FDA	PPP3CA;PPP3CB;PPP3CC;PPP3R1;PPP3R2	inhibitor of calcineurin	255;360;423;445;467;475;479	CO[C@@H]1C[C@@H](CC[C@H]1O)\C=C(/C)[C@H]1OC(=O)[C@@H]2CCCCN2C(=O)C(=O)[C@]2(O)O[C@@H]([C@H](C[C@H]2C)OC)[C@H](C[C@@H](C)C\C(C)=C\[C@@H](CC=C)C(=O)C[C@H](O)[C@H]1C)OC
361	ISOX	BRD-K69840642	33	probe	HDAC6	inhibitor of HDAC6	38;62;93;155;238;297;392;439;457;461;467;475;479	CC(C)(C)OC(=O)Nc1ccc(cc1)-c1cc(no1)C(=O)NCCCCCCC(=O)NO
362	AZD8055	BRD-K69932463	66	clinical	MTOR	inhibitor of mTOR	27;68;153;370;380;421;438;445;467;475;479	COc1ccc(cc1CO)-c1ccc2c(nc(nc2n1)N1CCOC[C@@H]1C)N1CCOC[C@@H]1C
363	CIL55A	BRD-K69982010	80	probe		screening hit	379;401;425;447;476;478;479	CN(C)CCNC(=O)c1cc2CSc3ccc(Cl)cc3-c2s1
364	ibrutinib	BRD-K70301465	66	clinical	BTK	inhibitor of Bruton's tyrosine kinase	86;103;202;355;431;460;465;474;475;479	Nc1ncnc2n(nc(-c3ccc(Oc4ccccc4)cc3)c12)[C@@H]1CCCN(C1)C(=O)C=C
365	erlotinib	BRD-K70401845	66	FDA	EGFR;ERBB2	inhibitor of EGFR and HER2	30;79;102;168;202;355;431;460;465;474;475;479	COCCOc1cc2ncnc(Nc3cccc(c3)C#C)c2cc1OCCOC
366	ML312	BRD-K70809902	66	probe	SCARB1	inhibitor of scavenger receptor class B, member 1 (SCARB1)-mediated lipid uptake	290;341;388;436;470;474;475;479	CC(C)NC(=O)Nc1ccc2O[C@@H](CN(C)S(=O)(=O)c3ccc(Cl)cc3)[C@H](C)CN([C@H](C)CO)C(=O)c2c1
367	masitinib	BRD-K71035033	66	clinical	KIT;PDGFRA;PDGFRB	inhibitor of c-KIT, PDGFRA, and PDGFRB	78;206;407;430;457;461;467;475;479	CN1CCN(Cc2ccc(cc2)C(=O)Nc2ccc(C)c(Nc3nc(cs3)-c3cccnc3)c2)CC1
368	SNX-2112	BRD-K71281111	37	probe	HSP90AA1;HSP90B1	inhibitor of HSP90alpha and HSP90beta	49;127;358;372;425;447;476;478;479	CC1(C)Cc2c(c(nn2-c2ccc(C(N)=O)c(N[C@H]3CC[C@H](O)CC3)c2)C(F)(F)F)C(=O)C1
369	KPT185	BRD-K71467466	66	probe	XPO1	inhibitor of exportin 1	144;179;222;260;374;403;449;461;467;475;479	COc1cc(cc(c1)C(F)(F)F)-c1ncn(\C=C/C(=O)OC(C)C)n1
370	Ch-55	BRD-K71487808	66	probe	RARA;RARB;RARG	agonist of retinoid acid receptors	74;210;300;349;377;427;446;460;465;474;475;479	CC(C)(C)c1cc(cc(c1)C(C)(C)C)C(=O)\C=C\c1ccc(cc1)C(O)=O
371	N9-isopropylolomoucine	BRD-K71726959	400	probe	CCNB1;CDK1;CDK5;CDK5R1	inhibitor of CDK1/cyclin B and CDK5/p35 complexes	174;242;272;315;372;425;447;476;478;479	CC(C)n1cnc2c(NCc3ccccc3)nc(NCCO)nc12
372	BRD-K71781559	BRD-K71781559	66	probe		screening hit	420;455;464;469;472;476;478;479	OC(=O)c1ccc(NCc2nc3cc4ccccc4cc3[nH]2)cc1
373	BRD-K71935468	BRD-K71935468	83	probe		inducer of ROS	17;411;446;460;465;474;475;479	COC(=O)C(CC#Cc1ccc2NC(=O)[C@@]3([C@H]([C@H]4N([C@H]3c3ccccc3OCCO)[C@@H]([C@@H](OC4=O)c3ccccc3)c3ccccc3)C(=O)N3CCN(CC3)c3ncccn3)c2c1)C(=O)OC
374	QW-BI-011	BRD-K72264770	33	probe	EHMT2	inhibitor of G9a histone methyltransferase	353;399;444;472;476;478;479	COC(=O)c1ccc2n(CCCc3ccccc3)c(NC(=O)c3ccccc3)nc2c1
375	WZ4002	BRD-K72420232	33	probe	EGFR	inhibitor of EGFR targeting T790M resistance	103;202;355;431;460;465;474;475;479	COc1cc(ccc1Nc1ncc(Cl)c(Oc2cccc(NC(=O)C=C)c2)n1)N1CCN(C)CC1
376	BRD1812	BRD-K73261812	66	probe		screening hit	158;237;327;391;418;442;456;466;469;472;476;478;479	Oc1ccc(C[C@@H]2N3[C@H](CN(Cc4cccc5ccccc45)C2=O)N(CCC3=O)C(=O)NCc2ccccc2)cc1
377	purmorphamine	BRD-K73397362	150	probe	SMO	activator of smoothened receptor	286;386;409;450;471;477	C1CCC(CC1)n1cnc2c(Nc3ccc(cc3)N3CCOCC3)nc(Oc3cccc4ccccc34)nc12
378	BIRB-796	BRD-K74065929	66	probe	MAPK11;MAPK11;MAPK14	inhibitor of p38 MAPK	318;366;440;458;465;474;475;479	Cc1ccc(cc1)-n1nc(cc1NC(=O)Nc1ccc(OCCN2CCOCC2)c2ccccc12)C(C)(C)C
379	curcumin	BRD-K74148702	170	clinical		natural product; modulator of ROS; modulator of NF-kappa-B signaling	162;246;299;344;410;438;445;467;475;479	COc1cc(C=CC(=O)CC(=O)C=Cc2ccc(O)c(OC)c2)ccc1O
380	UNC0321	BRD-K74236984	33	probe	EHMT2	inhibitor of G9a histone methyltransferase	63;289;395;411;446;460;465;474;475;479	COc1cc2c(NC3CCN(C)CC3)nc(nc2cc1OCCOCCN(C)C)N1CCCN(C)CC1
381	NSC632839	BRD-K74402642	33	probe	USP13;USP5	inhibitor of ubiquitin isopeptidase	144;179;222;260;374;403;449;461;467;475;479	Cc1ccc(cc1)\C=C1\CNC\C(=C/c2ccc(C)cc2)C1=O
382	pazopanib	BRD-K74514084	66	FDA	FLT1;FLT3;KDR;KIT;PDGFRB	inhibitor of VEGFRs, c-KIT, and PDGFRB	52;181;221;347;421;438;445;467;475;479	CN(c1ccc2c(C)n(C)nc2c1)c1ccnc(Nc2ccc(C)c(c2)S(N)(=O)=O)n1
383	BRD-K75293299	BRD-K75293299	66	GE-active		product of diversity oriented synthesis	151;195;271;308;382;434;454;470;474;475;479	C[C@@H](CO)N1C[C@@H](C)[C@H](CN(C)C(=O)Nc2cccc3ccccc23)Oc2c(NC(=O)c3ccncc3)cccc2C1=O
384	alisertib	BRD-K75295174	66	clinical	AURKA;AURKB	inhibitor of aurora kinases A and B	45;154;240;312;404;423;445;467;475;479	COc1cc(Nc2ncc3CN=C(c4cc(Cl)ccc4-c3n2)c2c(F)cccc2OC)ccc1C(O)=O
385	XL765	BRD-K75308783	66	clinical	MTOR;PIK3CA;PIK3CB;PIK3CD;PIK3CG;PRKDC	inhibitor of mTOR and PI3K kinase acitivities	249;387;412;434;454;470;474;475;479	COc1cc(Nc2nc3ccccc3nc2NS(=O)(=O)c2ccc(NC(=O)c3ccc(C)c(OC)c3)cc2)cc(OC)c1
386	IC-87114	BRD-K75430629	66	probe	PIK3CD	inhibitor of PI3K catalytic subunit delta	343;413;444;472;476;478;479	Cc1ccccc1-n1c(Cn2cnc3c(N)ncnc23)nc2cccc(C)c2c1=O
387	JW-74	BRD-K75664313	66	probe		inhibitor of WNT signaling	218;241;388;436;470;474;475;479	COc1ccc(cc1)-n1c(SCc2nc(no2)-c2ccc(C)cc2)nnc1-c1ccncc1
388	omacetaxine mepesuccinate	BRD-K76674262	66	FDA		inhibitor of protein translation by preventing protein elongation	114;257;315;372;425;447;476;478;479	COC(=O)C[C@](O)(CCCC(C)(C)O)C(=O)O[C@H]1[C@H]2c3cc4OCOc4cc3CCN3CCC[C@]23C=C1OC
389	YM-155	BRD-K76703230	1	clinical	BIRC5	inhibitor of survivin expression	267;327;391;418;442;456;466;469;472;476;478;479	COCCn1c2c(C(=O)c3ccccc3C2=O)[n+](Cc2cnccn2)c1C
390	A-804598	BRD-K76894955	66	probe	P2RX7	inhibitor of purinergic receptor P2X	265;405;448;468;477	C[C@H](\N=C(\NC#N)Nc1cccc2ncccc12)c1ccccc1
391	EX-527	BRD-K76964878	80	clinical	SIRT1	inhibitor of sirtuin 1	131;326;363;462;471;477	NC(=O)[C@H]1CCCc2c1[nH]c1ccc(Cl)cc21
392	vandetanib	BRD-K77625799	66	FDA	EGFR;KDR	inhibitor of VEGFR2 and EGFR	59;79;102;168;202;355;431;460;465;474;475;479	COc1cc2c(Nc3ccc(Br)cc3F)ncnc2cc1OCC1CCN(C)CC1
393	entinostat	BRD-K77908580	66	clinical	HDAC1;HDAC2;HDAC3;HDAC6;HDAC8	inhibitor of HDAC1, HDAC2, HDAC3, HDAC6, and HDAC8	66;93;155;238;297;392;439;457;461;467;475;479	Nc1ccccc1NC(=O)c1ccc(CNC(=O)OCc2cccnc2)cc1
394	LY-2157299	BRD-K78118466	66	probe	TGFBR1	inhibitor of the transforming growth factor beta type 1 receptor	291;314;441;459;473;478;479	Cc1cccc(n1)-c1nn2CCCc2c1-c1ccnc2ccc(cc12)C(N)=O
395	crizotinib	BRD-K78431006	66	FDA	ALK;MET	inhibitor of c-MET and ALK	137;198;293;370;380;421;438;445;467;475;479	C[C@@H](Oc1cc(cnc1N)-c1cnn(c1)C1CCNCC1)c1c(Cl)ccc(F)c1Cl
396	BRD-K78574327	BRD-K78574327	66	GE-active		product of diversity oriented synthesis	119;191;321;354;435;459;473;478;479	C[C@H](CO)N1C[C@H](C)[C@H](CN(C)CC2CC2)Oc2ccc(NS(=O)(=O)c3cn(C)cn3)cc2C1=O
397	manumycin A	BRD-K78599730	30	probe	FNTA;FNTB	inhibitor of RAS farnesyltransferase	123;187;215;304;376;394;437;449;461;467;475;479	CCCC[C@@H](C)\C=C(C)\C=C(/C)C(=O)NC1=C[C@@](O)(\C=C\C=C\C=C\C(=O)NC2C(=O)CCC2=O)[C@@H]2O[C@@H]2C1=O
398	MLN2238	BRD-K78659596	33	clinical	PSMB5	inhibitor of 20S proteasome at the chymotrypsin-like proteolytic (beta-5) site	8;171;379;401;425;447;476;478;479	CC(C)C[C@H](NC(=O)CNC(=O)c1cc(Cl)ccc1Cl)B(O)O
399	GSK4112	BRD-K78667050	66	probe	NR1D1	antagonist of Rev-ErbAalpha	204;377;427;446;460;465;474;475;479	CC(C)(C)OC(=O)CN(Cc1ccc(s1)[N+]([O-])=O)Cc1ccc(Cl)cc1
400	KHS101	BRD-K78978711	66	probe	TACC3	binder of TACC3, a component of the centrosome and mitotic spindle	139;298;424;442;456;466;469;472;476;478;479	CC(C)CNc1ccnc(NCc2csc(n2)-c2ccccc2)n1
401	PF-573228	BRD-K79239947	66	probe	PTK2	inhibitor of focal adhesion kinase	198;293;370;380;421;438;445;467;475;479	CS(=O)(=O)c1cccc(CNc2nc(Nc3ccc4NC(=O)CCc4c3)ncc2C(F)(F)F)c1
402	decitabine	BRD-K79254416	66	FDA	DNMT1	inhibitor of DNA methyltransferase	196;276;385;422;447;476;478;479	Nc1ncn([C@H]2C[C@H](O)[C@@H](CO)O2)c(=O)n1
403	PF-543	BRD-K79877282	33	probe	SPHK1	inhibitor of sphingosine kinase-1	197;313;371;430;457;461;467;475;479	Cc1cc(CS(=O)(=O)c2ccccc2)cc(OCc2ccc(CN3CCC[C@@H]3CO)cc2)c1
404	BRD-K80183349	BRD-K80183349	66	probe	HDAC1;HDAC2	inhibitor of HDAC1 and HDAC2	156;297;392;439;457;461;467;475;479	CC(=O)N1CCC(CC1)C(=O)Nc1cc(ccc1N)-c1cccs1
405	ML203	BRD-K80672993	37	probe	PKM	activator of muscle pyruvate kinase (PKM2)	136;250;359;452;462;471;477	Nc1cccc(c1)S(=O)(=O)N1CCCN(CC1)S(=O)(=O)c1ccc2OCCOc2c1
406	etomoxir	BRD-K81335284	300	clinical	CPT1A	inhibitor of carnitine palmitoyltransferase	233;382;434;454;470;474;475;479	OC(=O)[C@@]1(CCCCCCOc2ccc(Cl)cc2)CO1
407	vorinostat	BRD-K81418486	33	FDA	HDAC1;HDAC2;HDAC3;HDAC6;HDAC8	inhibitor of HDAC1, HDAC2, HDAC3, HDAC6, and HDAC8	62;93;155;238;297;392;439;457;461;467;475;479	ONC(=O)CCCCCCC(=O)Nc1ccccc1
408	silmitasertib	BRD-K81458380	66	clinical	CSNK2A1;CSNK2A2	inhibitor of casein kinase 2	100;190;228;345;383;450;471;477	OC(=O)c1ccc2c(c1)nc(Nc1cccc(Cl)c1)c1ccncc21
409	tanespimycin	BRD-K81473043	33	clinical	HSP90AA1	inhibitor of HSP90	49;127;358;372;425;447;476;478;479	CO[C@H]1C[C@H](C)CC2=C(NCC=C)C(=O)C=C(NC(=O)\C(C)=C\C=C/[C@H](OC)[C@@H](OC(N)=O)\C(C)=C\[C@H](C)[C@H]1O)C2=O
410	ML320	BRD-K81491172	66	probe	GSK3B	inhibitor of GSK3 beta	324;402;453;466;469;472;476;478;479	COc1ccccc1[C@H]1c2c(NC3=C1C(=O)CC(C)(C)C3)n[nH]c2C(F)(F)F
411	nilotinib	BRD-K81528515	66	FDA	ABL1;BCR;KIT	inhibitor of ABL1, BCR, and c-KIT	206;407;430;457;461;467;475;479	Cc1cn(cn1)-c1cc(NC(=O)c2ccc(C)c(Nc3nccc(n3)-c3cccnc3)c2)cc(c1)C(F)(F)F
412	parthenolide	BRD-K81651477	66	probe		natural product; modulator of ROS; modulator of NF-kappa-B signaling	128;141;183;262;338;363;462;471;477	C\C1=C\CC[C@@]2(C)O[C@@H]2[C@H]2OC(=O)C(=C)[C@@H]2CC1
413	WZ8040	BRD-K81728688	66	probe	EGFR	inhibitor of EGFR targeting T790M resistance	168;202;355;431;460;465;474;475;479	CN1CCN(CC1)c1ccc(Nc2ncc(Cl)c(Sc3cccc(NC(=O)C=C)c3)n2)cc1
414	vincristine	BRD-K82109576	130	FDA		inhibitor of mictrotubule assembly	10;19;39;50;75;85;199;227;336;358;372;425;447;476;478;479	CC[C@]1(O)C[C@@H]2CN(C1)CCc1c([nH]c3ccccc13)[C@@](C2)(C(=O)OC)c1cc2c(cc1OC)N(C=O)[C@@H]1[C@]22CCN3CC=C[C@](CC)([C@@H]23)[C@@H](OC(C)=O)[C@]1(O)C(=O)OC
415	navitoclax	BRD-K82746043	33	clinical	BCL2;BCL2L1;BCL2L2	inhibitor of BCL2, BCL-xL, and BCL-W	28;229;369;417;437;449;461;467;475;479	CC1(C)CCC(=C(CN2CCN(CC2)c2ccc(cc2)C(=O)NS(=O)(=O)c2ccc(N[C@H](CCN3CCOCC3)CSc3ccccc3)c(c2)S(=O)(=O)C(F)(F)F)C1)c1ccc(Cl)cc1
416	PF-750	BRD-K83213911	270	probe	FAAH	inhibitor of fatty acid amide hydrolase	104;188;273;381;418;442;456;466;469;472;476;478;479	O=C(Nc1ccccc1)N1CCC(Cc2cnc3ccccc3c2)CC1
417	CAY10618	BRD-K83289131	33	probe	NAMPT	inhibitor of nicotinamide phosphoribosyltransferase	3;16;43;217;385;422;447;476;478;479	O=C(CCCCCCCn1cc(nn1)-c1cccnc1)Nc1ccccc1-c1ccccc1
418	PL-DI	BRD-K83336168	66	probe		dimer of piperlongumine; inducer of ROS	120;159;215;304;376;394;437;449;461;467;475;479	COc1cc(\C=C\C(=O)N2CCC=CC2=O)cc(OC)c1OCCN(C)CCOc1c(OC)cc(\C=C\C(=O)N2CCC=CC2=O)cc1OC
419	skepinone-L	BRD-K83607951	66	probe	MAPK14	inhibitor of p38 MAPK	266;346;398;440;458;465;474;475;479	OC[C@@H](O)COc1ccc2CCc3cc(Nc4ccc(F)cc4F)ccc3C(=O)c2c1
420	nelarabine	BRD-K84466663	66	FDA	POLA1	deoxyguanosine analog; inhibitor of DNA synthesis	212;316;368;429;468;477	COc1nc(N)nc2n(cnc12)[C@@H]1O[C@H](CO)[C@@H](O)[C@@H]1O
421	CBB-1007	BRD-K84754008	66	probe	KDM1A	inhibitor of lysine-specific demethylase 1A (LSD1)	83;226;340;398;440;458;465;474;475;479	COC(=O)c1cc(CN2CCN(CC2)C(N)=N)cc(c1)C(=O)N1CCN(CC1)C(=O)c1ccc(cc1)C(N)=N
422	BRD-K84807411	BRD-K84807411	66	GE-active		product of diversity oriented synthesis	95;109;191;321;354;435;459;473;478;479	C[C@H](CO)N1C[C@H](C)[C@@H](CN(C)C)Oc2c(NC(=O)c3cc(C)nn3C)cccc2C1=O
423	sirolimus	BRD-K84937637	33	FDA	MTOR	inhibitor of mTOR	51;153;370;380;421;438;445;467;475;479	CO[C@@H]1C[C@H](C[C@@H](C)[C@@H]2CC(=O)[C@H](C)\C=C(C)\[C@@H](O)[C@@H](OC)C(=O)[C@H](C)C[C@H](C)\C=C\C=C\C=C(C)\[C@H](C[C@@H]3CC[C@@H](C)[C@@](O)(O3)C(=O)C(=O)N3CCCC[C@H]3C(=O)O2)OC)CC[C@H]1O
424	spautin-1	BRD-K84964099	66	probe	USP10;USP13	inhibitor of the deubiquitinase activity of USP13 and USP10	64;139;298;424;442;456;466;469;472;476;478;479	Fc1ccc(CNc2ncnc3ccc(F)cc23)cc1
425	BRD-K85133207	BRD-K85133207	66	probe	HDAC1	inhibitor of HDAC1	189;249;387;412;434;454;470;474;475;479	CC(=O)N[C@H]1C[C@H](C1)C(=O)Nc1cc(ccc1N)-c1ccc(F)cc1
426	neratinib	BRD-K85606544	33	clinical	EGFR;ERBB2	inhibitor of EGFR and HER2	13;21;47;59;79;102;168;202;355;431;460;465;474;475;479	CCOc1cc2ncc(C#N)c(Nc3ccc(OCc4ccccn4)c(Cl)c3)c2cc1NC(=O)\C=C\CN(C)C
427	AZD7762	BRD-K86525559	66	clinical	CHEK1;CHEK2	inhibitor of checkpoint kinases 1 and 2	121;242;272;315;372;425;447;476;478;479	NC(=O)Nc1cc(sc1C(=O)N[C@H]1CCCNC1)-c1cccc(F)c1
428	BRD-K86535717	BRD-K86535717	66	GE-active		product of diversity oriented synthesis	108;133;195;271;308;382;434;454;470;474;475;479	CO[C@@H]1CC[C@H]2CCN(C)C(=O)[C@@H](C)[C@H](CN(C)C(=O)c3cccc(C#N)c3OC[C@H]1O2)OC
429	BRD4132	BRD-K86574132	160	probe		screening hit	194;216;296;350;386;409;450;471;477	CC(C)N1C(=O)S\C(=C\c2ccc(Sc3nc4ccccc4[nH]3)o2)C1=O
430	bafilomycin A1	BRD-K86787118	0.33	probe	ATP6V0A1	inhibitor of the vacuolar-type H+-ATPase	428;458;465;474;475;479	CO[C@H]1\C=C\C=C(C)\C[C@@H](C)[C@H](O)[C@H](C)\C=C(C)\C=C(OC)\C(=O)O[C@@H]1[C@@H](C)[C@@H](O)[C@H](C)[C@H]1C[C@@H](O)[C@H](C)[C@H](O1)C(C)C
431	UNC0638	BRD-K86856088	33	probe	EHMT1;EHMT2	inhibitor of EHMT2 and GLP methyltransferase	69;164;310;371;430;457;461;467;475;479	COc1cc2c(NC3CCN(CC3)C(C)C)nc(nc2cc1OCCCN1CCCC1)C1CCCCC1
432	cediranib	BRD-K86930074	66	clinical	FLT1;FLT4;KDR	inhibitor of VEGFRs	301;347;421;438;445;467;475;479	COc1cc2c(Oc3ccc4[nH]c(C)cc4c3F)ncnc2cc1OCCCN1CCCC1
433	OSI-027	BRD-K87124298	66	clinical	MTOR	inhibitor of mTORC1 and mTORC2	68;153;370;380;421;438;445;467;475;479	COc1cccc2cc([nH]c12)-c1nc([C@H]2CC[C@@H](CC2)C(O)=O)n2ncnc(N)c12
434	veliparib	BRD-K87142802	33	clinical	PARP1;PARP2	inhibitor of poly (ADP-ribose) polymerase 1 (PARP1) and 2 (PARP2)	247;318;366;440;458;465;474;475;479	C[C@@]1(CCCN1)c1nc2c(cccc2[nH]1)C(N)=O
435	L-685458	BRD-K87317732	37	probe	APH1A;NCSTN;PSEN1;PSENEN	inhibitor of gamma-secretase	289;395;411;446;460;465;474;475;479	CC(C)C[C@H](NC(=O)[C@@H](C[C@@H](O)[C@H](Cc1ccccc1)NC(=O)OC(C)(C)C)Cc1ccccc1)C(=O)N[C@@H](Cc1ccccc1)C(N)=O
436	momelotinib	BRD-K87737963	66	clinical	JAK1;JAK2	inhibitor of Janus kinases 1 and 2	174;242;272;315;372;425;447;476;478;479	O=C(NCC#N)c1ccc(cc1)-c1ccnc(Nc2ccc(cc2)N2CCOCC2)n1
437	istradefylline	BRD-K87774949	33	clinical	ADORA2A	antagonist of the adenosine A2A receptor	366;440;458;465;474;475;479	CCn1c2nc(\C=C\c3ccc(OC)c(OC)c3)n(C)c2c(=O)n(CC)c1=O
438	fingolimod	BRD-K88025533	66	FDA	S1PR1	inhibitor of sphingosine 1-phosphate receptor	111;287;313;371;430;457;461;467;475;479	CCCCCCCCc1ccc(CCC(N)(CO)CO)cc1
439	bortezomib	BRD-K88510285	0.13	FDA	PSMB1;PSMB2;PSMB5;PSMD1;PSMD2	inhibitor of 26S proteasome	8;171;379;401;425;447;476;478;479	CC(C)C[C@H](NC(=O)[C@H](Cc1ccccc1)NC(=O)c1cnccn1)B(O)O
440	CI-976	BRD-K88544581	270	probe	ACAT1	inhibitor of acetyl-CoA acetyltransferase I	317;337;409;450;471;477	CCCCCCCCCCC(C)(C)C(=O)Nc1c(OC)cc(OC)cc1OC
441	BRD-K88742110	BRD-K88742110	66	probe	HDAC8	inhibitor of HDAC8	115;324;402;453;466;469;472;476;478;479	COc1ccc(Cn2ccc3ccc(cc23)C(=O)NO)cc1
442	tandutinib	BRD-K89162000	66	clinical	FLT3;KIT	inhibitor of c-KIT and VEGFR3	128;141;183;262;338;363;462;471;477	COc1cc2c(ncnc2cc1OCCCN1CCCCC1)N1CCN(CC1)C(=O)Nc1ccc(OC(C)C)cc1
443	BRD9876	BRD-K89329876	130	probe		screening hit	141;183;262;338;363;462;471;477	CC(C)(C)c1ccc2cc(C#N)c(cc2c1)C#N
444	RG-108	BRD-K89391146	270	probe	DNMT1	inhibitor of DNA methyltransferase	217;385;422;447;476;478;479	OC(=O)[C@H](Cc1c[nH]c2ccccc12)N1C(=O)c2ccccc2C1=O
445	ML006	BRD-K89692698	530	probe	S1PR3	agonist of sphingosine 1-phosphate receptor 3	81;228;345;383;450;471;477	C1CN(CCO1)c1nnc(-c2ccccc2)c(n1)-c1ccccc1
446	trifluoperazine	BRD-K89732114	33	FDA	DRD2	antagonist of dopamine receptor D2	124;197;313;371;430;457;461;467;475;479	CN1CCN(CCCN2c3ccccc3Sc3ccc(cc23)C(F)(F)F)CC1
447	BRD-K90370028	BRD-K90370028	33	probe		screening hit	340;398;440;458;465;474;475;479	CC(=O)N[C@@H]1C\C=C\CCC(=O)N[C@@H](COC1=O)c1ccccc1
448	GW-843682X	BRD-K90382497	33	probe	PLK1;PLK3	inhibitor of PLK1 and PLK3	65;132;227;336;358;372;425;447;476;478;479	COc1cc2ncn(-c3cc(OCc4ccccc4C(F)(F)F)c(s3)C(N)=O)c2cc1OC
449	pitstop2	BRD-K90570971	66	probe	CLTA;CLTB;CLTC;CLTCL1	inhibitor of clathrin and clathrin-independent endocytosis	110;399;444;472;476;478;479	Brc1ccc(cc1)\C=C1/SC(NS(=O)(=O)c2cccc3ccccc23)=NC1=O
450	bosutinib	BRD-K90746395	66	FDA	ABL1;SRC	inhibitor of SRC and ABL1	102;168;202;355;431;460;465;474;475;479	COc1cc(Nc2cc(nc3cc(OCCCN4CCN(C)CC4)c(OC)cc23)C#N)c(Cl)cc1Cl
451	MI-2	BRD-K90860366	66	probe	MEN1	binder of menin; inhibitor of menin-MLL fusion protein	266;346;398;440;458;465;474;475;479	CCCc1cc2c(ncnc2s1)N1CCN(CC1)C1=NCC(C)(C)S1
452	O-6-benzylguanine	BRD-K92041145	66	clinical	MGMT	inhibitor of O(6)-alkylguanine DNA alkyltransferases	302;319;435;459;473;478;479	Nc1nc(OCc2ccccc2)c2[nH]cnc2n1
453	doxorubicin	BRD-K92093830	66	FDA	TOP2A	inhibitor of topoisomerase II	72;224;240;312;404;423;445;467;475;479	COc1cccc2C(=O)c3c(O)c4C[C@](O)(C[C@H](O[C@H]5C[C@H](N)[C@H](O)[C@H](C)O5)c4c(O)c3C(=O)c12)C(=O)CO
454	tosedostat	BRD-K92241597	270	clinical	ANPEP;LAP3;NPEPPS	inhibitor of leucine aminopeptidase 3 (LAP), puromycin-sensitive aminopeptidase (PuSA), and aminopeptidase N	311;432;451;454;470;474;475;479	CC(C)C[C@H]([C@H](O)C(=O)NO)C(=O)N[C@H](C(=O)OC1CCCC1)c1ccccc1
455	GSK461364	BRD-K92428232	66	clinical	PLK1	inhibitor of polo-like kinase 1 (PLK1)	7;50;75;85;199;227;336;358;372;425;447;476;478;479	C[C@@H](Oc1cc(sc1C(N)=O)-n1cnc2ccc(CN3CCN(C)CC3)cc12)c1ccccc1C(F)(F)F
456	bexarotene	BRD-K92441787	66	FDA	RXRA;RXRB;RXRG	inhibitor of retinoid X receptors	251;339;389;463;473;478;479	Cc1cc2c(cc1C(=C)c1ccc(cc1)C(O)=O)C(C)(C)CCC2(C)C
457	imatinib	BRD-K92723993	66	FDA	ABL1;BCR;KIT	inhibitor of BCR-ABL1 and c-KIT	78;206;407;430;457;461;467;475;479	CN1CCN(Cc2ccc(cc2)C(=O)Nc2ccc(C)c(Nc3nccc(n3)-c3cccnc3)c2)CC1
458	BRD-K92856060	BRD-K92856060	33	probe		screening hit	267;327;391;418;442;456;466;469;472;476;478;479	COc1ccc(cc1[N+]([O-])=O)S(=O)(=O)N(C(C)=O)c1ccc(OC(C)=O)c2ccccc12
459	SMER-3	BRD-K92960067	66	probe	CUL1;SKP1	inhibitor of E3-ubiquitin ligase	234;295;394;437;449;461;467;475;479	O=C1c2ccccc2-c2nc3nonc3nc12
460	PAC-1	BRD-K92991072	33	probe	CASP3	activator of procaspase-3	112;160;325;396;439;457;461;467;475;479	Oc1c(CC=C)cccc1\C=N\NC(=O)CN1CCN(Cc2ccccc2)CC1
461	SJ-172550	BRD-K93095519	33	probe	MDM2;TP53	inhibitor of p53-MDM2 interaction	413;444;472;476;478;479	CCOc1cc(cc(Cl)c1OCC(=O)OC)\C=C1C(=O)N(N=C/1C)c1ccccc1
462	RAF265	BRD-K93123848	66	clinical	BRAF;KDR	ihibitor of VEGFR2 and BRAF	245;323;404;423;445;467;475;479	Cn1c(Nc2ccc(cc2)C(F)(F)F)nc2cc(Oc3ccnc(c3)-c3ncc([nH]3)C(F)(F)F)ccc12
463	AC55649	BRD-K93176058	33	probe	RARB	agonist of retinoic acid receptor beta	239;280;433;451;454;470;474;475;479	CCCCCCCCc1ccc(cc1)-c1ccc(cc1)C(O)=O
464	ML334 diastereomer	BRD-K93367411	130	probe	KEAP1;NFE2L2	inhibitor of KEAP1-NFE2L2 protein-protein interaction	305;384;429;468;477	OC(=O)[C@@H]1CCCC[C@@H]1C(=O)N1CCc2ccccc2[C@H]1CN1C(=O)c2ccccc2C1=O
465	vorapaxar	BRD-K93442924	66	clinical	F2R	antagonist of proteinase-activated receptor 1 (PAR1)	148;309;373;433;451;454;470;474;475;479	CCOC(=O)N[C@@H]1CC[C@@H]2[C@H](C[C@@H]3[C@@H]([C@@H](C)OC3=O)[C@H]2\C=C\c2ccc(cn2)-c2cccc(F)c2)C1
466	tamoxifen	BRD-K93754473	100	FDA	ESR1;ESR2	modulator of estrogen receptors	193;294;383;450;471;477	CC\C(c1ccccc1)=C(/c1ccccc1)c1ccc(OCCN(C)C)cc1
467	quizartinib	BRD-K93918653	66	clinical	FLT3	inhibtor of VEGFR3	235;387;412;434;454;470;474;475;479	CC(C)(C)c1cc(NC(=O)Nc2ccc(cc2)-c2cn3c(n2)sc2cc(OCCN4CCOCC4)ccc32)no1
468	CHM-1	BRD-K94145482	16	probe		inhibitor of tubulin polymerization	35;60;75;85;199;227;336;358;372;425;447;476;478;479	Fc1ccccc1-c1cc(=O)c2cc3OCOc3cc2[nH]1
469	BRD-K94991378	BRD-K94991378	83	probe		inducer of ROS	17;411;446;460;465;474;475;479	COCCOC(=O)N1C(=O)[C@]2([C@@H]([C@@H]3N([C@@H]2c2ccccc2OCCO)[C@H]([C@H](OC3=O)c2ccccc2)c2ccccc2)C(=O)NCC=C)c2cc(ccc12)C#CCC(C(=O)OC)C(=O)OC
470	VAF-347	BRD-K96335988	66	probe	AHR	inhibitor of aryl hydrocarbon receptor	342;463;473;478;479	FC(F)(F)c1ccc(Nc2nccc(n2)-c2cccc(Cl)c2)cc1
471	BRD-K96431673	BRD-K96431673	66	GE-active		product of diversity oriented synthesis	99;133;195;271;308;382;434;454;470;474;475;479	CN1CCN(CC1)C(=O)C[C@H]1CC[C@H](NC(=O)c2ccc3OCOc3c2)[C@@H](CO)O1
472	pifithrin-mu	BRD-K96799727	33	probe	HSPA1A;HSPA1B;HSPA1L;TP53	inhibitor of p53 binding to mitochondria; inhibitor of HSP70	256;381;418;442;456;466;469;472;476;478;479	NS(=O)(=O)C#Cc1ccccc1
473	BRD-K96970199	BRD-K96970199	66	GE-active		product of diversity oriented synthesis	99;133;195;271;308;382;434;454;470;474;475;479	C\C=C\c1ccc2c(O[C@@H](CN(C)C(=O)c3ccccc3)[C@@H](C)CN([C@@H](C)CO)S2(=O)=O)c1
474	BRD-K97651142	BRD-K97651142	66	probe		aphrocallistin derivative	32;64;139;298;424;442;456;466;469;472;476;478;479	CN(CCc1cc(Br)c(OCCCNc2ncnc3n(C)cnc23)c(Br)c1)C(=O)c1ccc(C)cc1
475	GSK-J4	BRD-K98203492	66	probe	KDM6A;KDM6B	inhibitor of lysine-specific demethylases	378;424;442;456;466;469;472;476;478;479	CCOC(=O)CCNc1cc(nc(n1)-c1ccccn1)N1CCc2ccccc2CC1
476	16-beta-bromoandrosterone	BRD-K98404142	37	probe		dehydroepiandrosterone (DHEA) analog	189;249;387;412;434;454;470;474;475;479	C[C@]12CC[C@H]3[C@@H](CC[C@H]4C[C@H](O)CC[C@]34C)[C@@H]1C[C@H](Br)C2=O
477	pluripotin	BRD-K98538768	33	probe	MAPK1;RASAL1	promoter of embryonic stem cell self-renewal; inhibitor of Ras-GAP and ERK	169;355;431;460;465;474;475;479	CN1C(=O)N(Cc2cnc(Nc3cc(C)nn3C)nc12)c1cc(NC(=O)c2cccc(c2)C(F)(F)F)ccc1C
478	BRD-K99006945	BRD-K99006945	66	probe		screening hit	55;408;453;466;469;472;476;478;479	CCN(CC)c1ccc(cc1)C1=NNC(=O)C[C@H]1C
479	JW-480	BRD-K99655327	66	probe	NCEH1	inhibitor of serine hydrolase enzyme NCEH	364;406;456;466;469;472;476;478;479	CC(C)c1ccccc1OC(=O)NCCc1ccc2ccccc2c1
480	linifanib	BRD-K99749624	66	clinical	FLT1;FLT3;KDR	inhibitor of VEGFRs	272;315;372;425;447;476;478;479	Cc1ccc(F)c(NC(=O)Nc2ccc(cc2)-c2cccc3[nH]nc(N)c23)c1
481	BRD-M00053801	BRD-M00053801	66	probe	BCL2	inhibitor of BCL2	230;337;409;450;471;477	C[C@H](O)[C@@H]1[C@H](CO)ON(Cc2cccc(CN(CCN(C)C)[C@H](C3CCCCC3)c3ccccc3)c2)[C@@H]1C(=O)N[C@H]1C[C@H]2C[C@@H]([C@@H]1C)C2(C)C.C[C@H](O)[C@@H]1[C@H](CO)ON(Cc2cccc(CN(CCN(C)C)[C@@H](C3CCCCC3)c3ccccc3)c2)[C@@H]1C(=O)N[C@H]1C[C@H]2C[C@@H]([C@@H]1C)C2(C)C

## Sheet: S2
index_ccl	cell_line_name	culture_media	ccle_primary_site	ccle_primary_histology	ccle_histology_subtype	cell_line_cluster_id
1	CHP212	EMEM001	autonomic_ganglia	neuroblastoma		440;513;552;589;607;628;638;647;651;657;660
2	IMR32	EMEM001	autonomic_ganglia	neuroblastoma		288;333;475;513;552;589;607;628;638;647;651;657;660
3	KELLY	RPMI001	autonomic_ganglia	neuroblastoma		23;116;259;393;423;480;556;569;601;604;615;624;631;638;647;651;657;660
4	KPNSI9S	RPMI001	autonomic_ganglia	neuroblastoma		98;138;199;377;460;485;542;567;600;609;624;631;638;647;651;657;660
5	KPNYN	RPMI001	autonomic_ganglia	neuroblastoma		620;652;655;657;660
6	MHHNB11	RPMI001	autonomic_ganglia	neuroblastoma		505;541;592;632;641;654;659;660
7	NB1	RPMI001	autonomic_ganglia	neuroblastoma		23;116;259;393;423;480;556;569;601;604;615;624;631;638;647;651;657;660
8	NH6	ALPHAMEM002	autonomic_ganglia	neuroblastoma		91;333;475;513;552;589;607;628;638;647;651;657;660
9	SIMA	RPMI001	autonomic_ganglia	neuroblastoma		592;632;641;654;659;660
10	SKNAS	DMEM012	autonomic_ganglia	neuroblastoma		107;281;331;395;464;514;539;569;601;604;615;624;631;638;647;651;657;660
11	SKNBE2	EMEMF12001	autonomic_ganglia	neuroblastoma		214;406;485;542;567;600;609;624;631;638;647;651;657;660
12	SKNDZ	DMEM001	autonomic_ganglia	neuroblastoma		339;475;513;552;589;607;628;638;647;651;657;660
13	SKNFI	DMEM012	autonomic_ganglia	neuroblastoma		440;513;552;589;607;628;638;647;651;657;660
14	SKNSH	EMEM001	autonomic_ganglia	neuroblastoma		91;333;475;513;552;589;607;628;638;647;651;657;660
15	HUCCT1	RPMI001	biliary_tract	carcinoma		371;515;632;641;654;659;660
16	HUH28	RPMI001	biliary_tract	carcinoma		361;582;608;627;636;646;651;657;660
17	SNU1079	RPMI001	biliary_tract	carcinoma		518;603;627;636;646;651;657;660
18	SNU1196	RPMI001	biliary_tract	carcinoma		123;313;381;465;520;586;605;611;629;643;645;654;659;660
19	SNU308	RPMI001	biliary_tract	carcinoma		344;365;445;521;550;572;602;608;627;636;646;651;657;660
20	SNU478	RPMI001	biliary_tract	carcinoma		28;82;194;290;304;388;507;540;574;591;598;616;630;643;645;654;659;660
21	SNU869	RPMI001	biliary_tract	carcinoma		316;433;478;536;566;589;607;628;638;647;651;657;660
22	A673	DMEM001	bone	Ewings_sarcoma_peripheral_primitive_neuroectodermal_tumor		8;66;202;239;350;383;459;464;514;539;569;601;604;615;624;631;638;647;651;657;660
23	CADOES1	RPMI001	bone	Ewings_sarcoma_peripheral_primitive_neuroectodermal_tumor		641;654;659;660
24	CAL78	RPMI003	bone	chondrosarcoma	dedifferentiated	503;551;565;601;604;615;624;631;638;647;651;657;660
25	G292CLONEA141B1	MCCOYS5A002	bone	osteosarcoma		295;424;502;556;569;601;604;615;624;631;638;647;651;657;660
26	HOS	EMEM001	bone	osteosarcoma		26;65;104;268;402;450;506;570;599;634;646;651;657;660
27	HS819T	DMEM001	bone	chondrosarcoma		220;397;519;572;602;608;627;636;646;651;657;660
28	HS822T	DMEM001	bone	Ewings_sarcoma_peripheral_primitive_neuroectodermal_tumor		491;554;618;644;655;657;660
29	HS888T	DMEM002	bone	osteosarcoma		525;554;618;644;655;657;660
30	MG63	MEM001	bone	osteosarcoma		255;410;471;578;610;628;638;647;651;657;660
31	MHHES1	RPMI001	bone	Ewings_sarcoma_peripheral_primitive_neuroectodermal_tumor		80;186;260;374;484;520;586;605;611;629;643;645;654;659;660
32	SAOS2	MCCOYS5A003	bone	osteosarcoma		68;75;267;349;411;459;464;514;539;569;601;604;615;624;631;638;647;651;657;660
33	SJSA1	RPMI001	bone	osteosarcoma		54;236;266;439;499;567;600;609;624;631;638;647;651;657;660
34	SKES1	MCCOYS5A003	bone	Ewings_sarcoma_peripheral_primitive_neuroectodermal_tumor		68;75;267;349;411;459;464;514;539;569;601;604;615;624;631;638;647;651;657;660
35	SKNMC	EMEM001	bone	Ewings_sarcoma_peripheral_primitive_neuroectodermal_tumor		8;66;202;239;350;383;459;464;514;539;569;601;604;615;624;631;638;647;651;657;660
36	SW1353	RPMI001	bone	chondrosarcoma		105;261;318;443;500;537;550;572;602;608;627;636;646;651;657;660
37	U2OS	DMEM001	bone	osteosarcoma		559;591;598;616;630;643;645;654;659;660
38	AU565	DMEM001	breast	carcinoma		164;493;568;588;623;631;638;647;651;657;660
39	BT20	EMEM001	breast	carcinoma	ductal_carcinoma	192;315;412;477;530;545;584;595;609;624;631;638;647;651;657;660
40	BT474	DMEM006	breast	carcinoma	ductal_carcinoma	535;568;588;623;631;638;647;651;657;660
41	BT549	RPMI001	breast	carcinoma	ductal_carcinoma	398;449;486;558;595;609;624;631;638;647;651;657;660
42	CAL120	DMEM001	breast	carcinoma		463;543;597;619;629;643;645;654;659;660
43	CAL148	DMEM006	breast	carcinoma	ductal_carcinoma	283;351;505;541;592;632;641;654;659;660
44	CAL51	DMEM006	breast	carcinoma		15;180;308;374;484;520;586;605;611;629;643;645;654;659;660
45	CAL851	DMEM001	breast	carcinoma		41;69;197;208;219;369;444;514;539;569;601;604;615;624;631;638;647;651;657;660
46	CAMA1	EMEM001	breast	carcinoma		429;581;583;611;629;643;645;654;659;660
47	EFM192A	RPMI003	breast	carcinoma		493;568;588;623;631;638;647;651;657;660
48	HCC1143	RPMI001	breast	carcinoma	ductal_carcinoma	155;321;382;442;504;511;600;609;624;631;638;647;651;657;660
49	HCC1395	RPMI001	breast	carcinoma	ductal_carcinoma	238;426;523;574;591;598;616;630;643;645;654;659;660
50	HCC1419	RPMI001	breast	carcinoma	ductal_carcinoma	456;535;568;588;623;631;638;647;651;657;660
51	HCC1428	RPMI001	breast	carcinoma		51;243;389;420;477;530;545;584;595;609;624;631;638;647;651;657;660
52	HCC1500	RPMI001	breast	carcinoma	ductal_carcinoma	479;553;573;607;628;638;647;651;657;660
53	HCC1569	RPMI001	breast	carcinoma	metaplastic_carcinoma	642;649;652;655;657;660
54	HCC1806	RPMI001	breast	carcinoma	ductal_carcinoma	32;148;271;384;432;484;520;586;605;611;629;643;645;654;659;660
55	HCC1937	RPMI001	breast	carcinoma	ductal_carcinoma	417;521;550;572;602;608;627;636;646;651;657;660
56	HCC1954	RPMI001	breast	carcinoma	ductal_carcinoma	132;405;434;476;528;560;586;605;611;629;643;645;654;659;660
57	HCC202	RPMI001	breast	carcinoma	ductal_carcinoma	368;378;547;584;595;609;624;631;638;647;651;657;660
58	HCC38	RPMI001	breast	carcinoma	ductal_carcinoma	398;449;486;558;595;609;624;631;638;647;651;657;660
59	HDQP1	RPMI001	breast	carcinoma	ductal_carcinoma	400;454;538;559;591;598;616;630;643;645;654;659;660
60	HMC18	RPMI001	breast	carcinoma		102;148;271;384;432;484;520;586;605;611;629;643;645;654;659;660
61	HS578T	DMEM001	breast	carcinoma	ductal_carcinoma	370;486;558;595;609;624;631;638;647;651;657;660
62	JIMT1	RPMI001	breast	carcinoma	ductal_carcinoma	204;381;465;520;586;605;611;629;643;645;654;659;660
63	KPL1	DMEM001	breast	carcinoma	ductal_carcinoma	653;658;662
64	MCF7	DMEM001	breast	carcinoma		387;496;583;611;629;643;645;654;659;660
65	MDAMB157	RPMI001	breast	carcinoma	ductal_carcinoma	573;607;628;638;647;651;657;660
66	MDAMB175VII	RPMI001	breast	carcinoma	ductal_carcinoma	74;215;285;395;464;514;539;569;601;604;615;624;631;638;647;651;657;660
67	MDAMB231	RPMI001	breast	carcinoma		217;372;467;517;576;594;602;608;627;636;646;651;657;660
68	MDAMB361	RPMI003	breast	carcinoma		428;562;590;593;615;624;631;638;647;651;657;660
69	MDAMB415	RPMI017	breast	carcinoma		633;647;651;657;660
70	MDAMB453	RPMI001	breast	carcinoma		428;562;590;593;615;624;631;638;647;651;657;660
71	MDAMB468	DMEM001	breast	carcinoma		66;202;239;350;383;459;464;514;539;569;601;604;615;624;631;638;647;651;657;660
72	SKBR3	MCCOYS5A001	breast	carcinoma		164;493;568;588;623;631;638;647;651;657;660
73	T47D	RPMI018	breast	carcinoma	ductal_carcinoma	410;471;578;610;628;638;647;651;657;660
74	ZR751	RPMI001	breast	carcinoma	ductal_carcinoma	533;604;615;624;631;638;647;651;657;660
75	ZR7530	RPMI001	breast	carcinoma	ductal_carcinoma	456;535;568;588;623;631;638;647;651;657;660
76	42MGBA	RPMIMEM001	central_nervous_system	glioma	astrocytoma_Grade_IV	409;566;589;607;628;638;647;651;657;660
77	8MGBA	EMEM005	central_nervous_system	glioma	astrocytoma_Grade_IV	330;390;474;570;599;634;646;651;657;660
78	A172	DMEM001	central_nervous_system	glioma	astrocytoma_Grade_IV	175;207;294;383;459;464;514;539;569;601;604;615;624;631;638;647;651;657;660
79	AM38	EMEM005	central_nervous_system	glioma	astrocytoma_Grade_IV	531;598;616;630;643;645;654;659;660
80	BECKER	EMEM001	central_nervous_system	glioma	astrocytoma_Grade_IV	36;85;239;350;383;459;464;514;539;569;601;604;615;624;631;638;647;651;657;660
81	CAS1	DMEM001	central_nervous_system	glioma	astrocytoma_Grade_IV	431;534;564;603;627;636;646;651;657;660
82	CCFSTTG1	RPMI001	central_nervous_system	glioma	astrocytoma	20;482;633;647;651;657;660
83	D283MED	EMEM001	central_nervous_system	primitive_neuroectodermal_tumor_medulloblastoma		113;169;288;333;475;513;552;589;607;628;638;647;651;657;660
84	DAOY	EMEM001	central_nervous_system	primitive_neuroectodermal_tumor_medulloblastoma		2;97;177;359;546;587;599;634;646;651;657;660
85	DBTRG05MG	RPMI001	central_nervous_system	glioma	astrocytoma_Grade_IV	397;519;572;602;608;627;636;646;651;657;660
86	DKMG	RPMI001	central_nervous_system	glioma	astrocytoma_Grade_IV	134;295;424;502;556;569;601;604;615;624;631;638;647;651;657;660
87	GAMG	DMEM001	central_nervous_system	glioma		115;329;423;480;556;569;601;604;615;624;631;638;647;651;657;660
88	GB1	EMEM001	central_nervous_system	glioma	astrocytoma_Grade_IV	10;289;408;447;522;564;603;627;636;646;651;657;660
89	GI1	DMEM001	central_nervous_system	glioma	gliosarcoma	207;294;383;459;464;514;539;569;601;604;615;624;631;638;647;651;657;660
90	GMS10	MEM001	central_nervous_system	glioma	astrocytoma_Grade_IV	87;224;324;389;420;477;530;545;584;595;609;624;631;638;647;651;657;660
91	GOS3	DMEM001	central_nervous_system	glioma	astrocytoma	87;224;324;389;420;477;530;545;584;595;609;624;631;638;647;651;657;660
92	HS683	DMEM001	central_nervous_system	glioma		47;161;197;208;219;369;444;514;539;569;601;604;615;624;631;638;647;651;657;660
93	KALS1	RPMI003	central_nervous_system	glioma		467;517;576;594;602;608;627;636;646;651;657;660
94	KG1C	DMEMF12003	central_nervous_system	glioma	astrocytoma_Grade_IV	544;576;594;602;608;627;636;646;651;657;660
95	KNS42	MEM001	central_nervous_system	glioma		450;506;570;599;634;646;651;657;660
96	KNS60	DMEM009	central_nervous_system	glioma	astrocytoma_Grade_IV	236;266;439;499;567;600;609;624;631;638;647;651;657;660
97	KNS81	DMEM009	central_nervous_system	glioma	astrocytoma_Grade_IV	317;436;613;626;644;655;657;660
98	LN18	DMEM009	central_nervous_system	glioma	astrocytoma_Grade_IV	114;322;426;523;574;591;598;616;630;643;645;654;659;660
99	LN229	DMEM009	central_nervous_system	glioma	astrocytoma_Grade_IV	43;158;234;313;381;465;520;586;605;611;629;643;645;654;659;660
100	M059K	DMEMF12003	central_nervous_system	glioma	astrocytoma_Grade_IV	24;134;295;424;502;556;569;601;604;615;624;631;638;647;651;657;660
101	NMCG1	DMEM001	central_nervous_system	glioma		515;632;641;654;659;660
102	ONS76	RPMI001	central_nervous_system	primitive_neuroectodermal_tumor_medulloblastoma		71;205;289;408;447;522;564;603;627;636;646;651;657;660
103	SF126	EMEM001	central_nervous_system	glioma	astrocytoma	10;289;408;447;522;564;603;627;636;646;651;657;660
104	SF268	RPMI001				12;55;135;233;281;331;395;464;514;539;569;601;604;615;624;631;638;647;651;657;660
105	SF295	RPMI001	central_nervous_system	glioma	astrocytoma_Grade_IV	488;522;564;603;627;636;646;651;657;660
106	SF539	RPMI005				12;55;135;233;281;331;395;464;514;539;569;601;604;615;624;631;638;647;651;657;660
107	SNB75	RPMI005				376;421;489;562;590;593;615;624;631;638;647;651;657;660
108	SNU1105	RPMI001	central_nervous_system	glioma	astrocytoma_Grade_IV	318;443;500;537;550;572;602;608;627;636;646;651;657;660
109	SNU201	RPMI001	central_nervous_system	glioma	astrocytoma_Grade_IV	518;603;627;636;646;651;657;660
110	SNU466	RPMI001	central_nervous_system	glioma	astrocytoma_Grade_IV	361;582;608;627;636;646;651;657;660
111	SNU489	RPMI001	central_nervous_system	glioma	astrocytoma_Grade_IV	364;452;534;564;603;627;636;646;651;657;660
112	SNU626	RPMI001	central_nervous_system	glioma	astrocytoma_Grade_IV	452;534;564;603;627;636;646;651;657;660
113	SNU738	RPMI001	central_nervous_system	glioma	oligodendroglioma	364;452;534;564;603;627;636;646;651;657;660
114	SW1088	RPMI001	central_nervous_system	glioma		115;329;423;480;556;569;601;604;615;624;631;638;647;651;657;660
115	SW1783	RPMI001	central_nervous_system	glioma	astrocytoma_Grade_III	620;652;655;657;660
116	T98G	EMEM001	central_nervous_system	glioma	astrocytoma_Grade_IV	262;506;570;599;634;646;651;657;660
117	TM31	MEM001	central_nervous_system	glioma	astrocytoma	65;104;268;402;450;506;570;599;634;646;651;657;660
118	U118MG	DMEM001	central_nervous_system	glioma	astrocytoma	213;441;497;557;596;619;629;643;645;654;659;660
119	U251MG	MEM001	central_nervous_system	glioma	astrocytoma	81;170;346;468;587;599;634;646;651;657;660
120	U87MG	EMEM001	central_nervous_system	glioma	astrocytoma	416;429;581;583;611;629;643;645;654;659;660
121	YH13	EMEM005	central_nervous_system	glioma	astrocytoma_Grade_IV	24;134;295;424;502;556;569;601;604;615;624;631;638;647;651;657;660
122	YKG1	DMEM001	central_nervous_system	glioma	astrocytoma_Grade_IV	143;278;466;536;566;589;607;628;638;647;651;657;660
123	HELA	DMEM001				596;619;629;643;645;654;659;660
124	AN3CA	EMEM001	endometrium	carcinoma	adenocarcinoma	157;211;307;390;474;570;599;634;646;651;657;660
125	EFE184	RPMI001	endometrium	carcinoma		448;499;567;600;609;624;631;638;647;651;657;660
126	EN	DMEM001	endometrium	carcinoma		327;441;497;557;596;619;629;643;645;654;659;660
127	ESS1	RPMI003	endometrium	carcinoma	carcinosarcoma; malignant_mesodermal_mixed_tumor	18;34;117;246;331;395;464;514;539;569;601;604;615;624;631;638;647;651;657;660
128	HEC108	EMEM002	endometrium	carcinoma	adenocarcinoma	94;253;432;484;520;586;605;611;629;643;645;654;659;660
129	HEC151	EMEM002	endometrium	carcinoma	adenocarcinoma	45;125;173;319;379;480;556;569;601;604;615;624;631;638;647;651;657;660
130	HEC1A	MCCOYS5A001	endometrium	carcinoma	adenocarcinoma	139;301;424;502;556;569;601;604;615;624;631;638;647;651;657;660
131	HEC1B	EMEM001	endometrium	carcinoma	adenocarcinoma	228;358;445;521;550;572;602;608;627;636;646;651;657;660
132	HEC251	EMEM002	endometrium	carcinoma	adenocarcinoma	109;269;405;434;476;528;560;586;605;611;629;643;645;654;659;660
133	HEC265	EMEM002	endometrium	carcinoma	adenocarcinoma	546;587;599;634;646;651;657;660
134	HEC50B	EMEM002	endometrium	carcinoma	adenocarcinoma	402;450;506;570;599;634;646;651;657;660
135	HEC59	EMEM002	endometrium	carcinoma	adenocarcinoma	103;205;289;408;447;522;564;603;627;636;646;651;657;660
136	HEC6	EMEM002	endometrium	carcinoma	adenocarcinoma	109;269;405;434;476;528;560;586;605;611;629;643;645;654;659;660
137	ISHIKAWAHERAKLIO02ER	MEM002	endometrium	carcinoma	adenocarcinoma	94;253;432;484;520;586;605;611;629;643;645;654;659;660
138	JHUEM1	DMEMF12003	endometrium	carcinoma	adenocarcinoma	57;270;393;423;480;556;569;601;604;615;624;631;638;647;651;657;660
139	JHUEM2	DMEMF12004	endometrium	carcinoma	adenocarcinoma	283;351;505;541;592;632;641;654;659;660
140	JHUEM3	DMEMF12004	endometrium	carcinoma	adenocarcinoma	347;433;478;536;566;589;607;628;638;647;651;657;660
141	JHUEM7	DMEMF12004	endometrium	carcinoma	adenocarcinoma	60;96;187;267;349;411;459;464;514;539;569;601;604;615;624;631;638;647;651;657;660
142	KLE	DMEMF12003	endometrium	carcinoma	adenocarcinoma	481;538;559;591;598;616;630;643;645;654;659;660
143	MFE296	RPMIMEM002	endometrium	carcinoma	adenocarcinoma	75;267;349;411;459;464;514;539;569;601;604;615;624;631;638;647;651;657;660
144	MFE319	RPMIMEM001	endometrium	carcinoma	adenocarcinoma	93;268;402;450;506;570;599;634;646;651;657;660
145	RL952	RPMI001	endometrium	carcinoma	mixed_adenosquamous_carcinoma	183;261;318;443;500;537;550;572;602;608;627;636;646;651;657;660
146	SNGM	HAMSF12002	endometrium	carcinoma	adenocarcinoma	84;235;319;379;480;556;569;601;604;615;624;631;638;647;651;657;660
147	SNU1077	RPMI001	endometrium	carcinoma	carcinosarcoma; malignant_mesodermal_mixed_tumor	408;447;522;564;603;627;636;646;651;657;660
148	SNU685	RPMI001	endometrium	carcinoma	carcinosarcoma; malignant_mesodermal_mixed_tumor	58;74;215;285;395;464;514;539;569;601;604;615;624;631;638;647;651;657;660
149	ALLSIL	RPMI001	haematopoietic_and_lymphoid_tissue	lymphoid_neoplasm	acute_lymphoblastic_T_cell_leukaemia	541;592;632;641;654;659;660
150	CMLT1	RPMI001	haematopoietic_and_lymphoid_tissue	haematopoietic_neoplasm	blast_phase; chronic_myeloid_leukaemia	90;264;415;465;520;586;605;611;629;643;645;654;659;660
151	HDMYZ	RPMI001	haematopoietic_and_lymphoid_tissue	lymphoid_neoplasm	Hodgkin_lymphoma	7;19;64;107;281;331;395;464;514;539;569;601;604;615;624;631;638;647;651;657;660
152	HEL	RPMI001	haematopoietic_and_lymphoid_tissue	haematopoietic_neoplasm	acute_myeloid_leukaemia	264;415;465;520;586;605;611;629;643;645;654;659;660
153	HS611T	DMEM001	haematopoietic_and_lymphoid_tissue	lymphoid_neoplasm	Hodgkin_lymphoma	60;96;187;267;349;411;459;464;514;539;569;601;604;615;624;631;638;647;651;657;660
154	JURKAT	RPMI001	haematopoietic_and_lymphoid_tissue	lymphoid_neoplasm	acute_lymphoblastic_T_cell_leukaemia	11;80;186;260;374;484;520;586;605;611;629;643;645;654;659;660
155	JVM2	RPMI001	haematopoietic_and_lymphoid_tissue	lymphoid_neoplasm	chronic_lymphocytic_leukaemia; small_lymphocytic_lymphoma	563;616;630;643;645;654;659;660
156	KASUMI2	RPMI001	haematopoietic_and_lymphoid_tissue	lymphoid_neoplasm	acute_lymphoblastic_B_cell_leukaemia	169;288;333;475;513;552;589;607;628;638;647;651;657;660
157	KCL22	RPMI001	haematopoietic_and_lymphoid_tissue	haematopoietic_neoplasm	blast_phase; chronic_myeloid_leukaemia	5;90;264;415;465;520;586;605;611;629;643;645;654;659;660
158	KMS11	RPMI001	haematopoietic_and_lymphoid_tissue	lymphoid_neoplasm	plasma_cell_myeloma	259;393;423;480;556;569;601;604;615;624;631;638;647;651;657;660
159	KMS18	RPMI001	haematopoietic_and_lymphoid_tissue	lymphoid_neoplasm	plasma_cell_myeloma	11;80;186;260;374;484;520;586;605;611;629;643;645;654;659;660
160	LAMA84	RPMI001	haematopoietic_and_lymphoid_tissue	haematopoietic_neoplasm	blast_phase; chronic_myeloid_leukaemia	5;90;264;415;465;520;586;605;611;629;643;645;654;659;660
161	MOLP8	RPMI003	haematopoietic_and_lymphoid_tissue	lymphoid_neoplasm	plasma_cell_myeloma	96;187;267;349;411;459;464;514;539;569;601;604;615;624;631;638;647;651;657;660
162	769P	RPMI001	kidney	carcinoma	clear_cell_renal_cell_carcinoma	181;234;313;381;465;520;586;605;611;629;643;645;654;659;660
163	786O	RPMI001	kidney	carcinoma	clear_cell_renal_cell_carcinoma	72;104;268;402;450;506;570;599;634;646;651;657;660
164	A498	EMEM001	kidney	carcinoma	renal_cell_carcinoma	610;628;638;647;651;657;660
165	ACHN	EMEM001	kidney	carcinoma	renal_cell_carcinoma	85;239;350;383;459;464;514;539;569;601;604;615;624;631;638;647;651;657;660
166	BFTC909	DMEM001	kidney	carcinoma		120;325;472;507;540;574;591;598;616;630;643;645;654;659;660
167	CAKI1	MCCOYS5A001	kidney	carcinoma	clear_cell_renal_cell_carcinoma	471;578;610;628;638;647;651;657;660
168	CAKI2	MCCOYS5A001	kidney	carcinoma	clear_cell_renal_cell_carcinoma	495;532;547;584;595;609;624;631;638;647;651;657;660
169	CAL54	DMEM011	kidney	carcinoma	renal_cell_carcinoma	347;433;478;536;566;589;607;628;638;647;651;657;660
170	KMRC1	DMEM001	kidney	carcinoma	clear_cell_renal_cell_carcinoma	121;243;389;420;477;530;545;584;595;609;624;631;638;647;651;657;660
171	KMRC2	DMEM001	kidney	carcinoma	clear_cell_renal_cell_carcinoma	227;492;549;571;613;626;644;655;657;660
172	KMRC20	DMEM001	kidney	carcinoma	renal_cell_carcinoma	231;358;445;521;550;572;602;608;627;636;646;651;657;660
173	KMRC3	DMEM001	kidney	carcinoma	clear_cell_renal_cell_carcinoma	516;590;593;615;624;631;638;647;651;657;660
174	OSRC2	RPMI001	kidney	carcinoma	renal_cell_carcinoma	519;572;602;608;627;636;646;651;657;660
175	RCC10RGB	DMEM001	kidney	carcinoma	renal_cell_carcinoma	491;554;618;644;655;657;660
176	SNU1272	RPMI001	kidney	carcinoma	clear_cell_renal_cell_carcinoma	336;496;583;611;629;643;645;654;659;660
177	TUHR10TKB	RPMI001	kidney	carcinoma		621;649;652;655;657;660
178	TUHR14TKB	RPMI001	kidney	carcinoma		642;649;652;655;657;660
179	TUHR4TKB	RPMI001	kidney	carcinoma		322;426;523;574;591;598;616;630;643;645;654;659;660
180	VMRCRCW	RPMI001	kidney	carcinoma		276;435;511;600;609;624;631;638;647;651;657;660
181	VMRCRCZ	EMEM001	kidney	carcinoma	renal_cell_carcinoma	302;495;532;547;584;595;609;624;631;638;647;651;657;660
182	C2BBE1	DMEM003	large_intestine	carcinoma	adenocarcinoma	252;323;357;494;545;584;595;609;624;631;638;647;651;657;660
183	CCK81	RPMI001	large_intestine	carcinoma	adenocarcinoma	282;560;586;605;611;629;643;645;654;659;660
184	CL11	DMEMF12006	large_intestine	carcinoma	adenocarcinoma	133;292;448;499;567;600;609;624;631;638;647;651;657;660
185	CL34	DMEM006	large_intestine	carcinoma	adenocarcinoma	656;661;662
186	COLO201	RPMI001	large_intestine	carcinoma	adenocarcinoma	310;345;498;555;575;605;611;629;643;645;654;659;660
187	COLO205	RPMI001	large_intestine	carcinoma	adenocarcinoma	334;446;528;560;586;605;611;629;643;645;654;659;660
188	COLO678	RPMI001	large_intestine	carcinoma	adenocarcinoma	257;396;510;527;588;623;631;638;647;651;657;660
189	CW2	RPMI001	large_intestine	carcinoma		282;560;586;605;611;629;643;645;654;659;660
190	DLD1	RPMI001	large_intestine	carcinoma	adenocarcinoma	430;523;574;591;598;616;630;643;645;654;659;660
191	HCC56	RPMI001	large_intestine	carcinoma	adenocarcinoma	501;530;545;584;595;609;624;631;638;647;651;657;660
192	HCT116	MCCOYS5A001	large_intestine	carcinoma		418;597;619;629;643;645;654;659;660
193	HCT15	RPMI001	large_intestine	carcinoma	adenocarcinoma	111;291;326;501;530;545;584;595;609;624;631;638;647;651;657;660
194	HCT8	RPMI001	large_intestine	carcinoma	adenocarcinoma	455;557;596;619;629;643;645;654;659;660
195	HT115	DMEM005	large_intestine	carcinoma		290;304;388;507;540;574;591;598;616;630;643;645;654;659;660
196	HT29	MCCOYS5A001	large_intestine	carcinoma	adenocarcinoma	418;597;619;629;643;645;654;659;660
197	HT55	EMEM003	large_intestine	carcinoma	adenocarcinoma	265;469;540;574;591;598;616;630;643;645;654;659;660
198	KM12	RPMI001	large_intestine	carcinoma	adenocarcinoma	380;414;502;556;569;601;604;615;624;631;638;647;651;657;660
199	LOVO	HAMSF12001	large_intestine	carcinoma	adenocarcinoma	166;256;328;460;485;542;567;600;609;624;631;638;647;651;657;660
200	LS1034	RPMI001	large_intestine	carcinoma	adenocarcinoma	252;323;357;494;545;584;595;609;624;631;638;647;651;657;660
201	LS123	EMEM001	large_intestine	carcinoma	adenocarcinoma	210;457;529;581;583;611;629;643;645;654;659;660
202	LS180	EMEM001	large_intestine	carcinoma	adenocarcinoma	108;249;446;528;560;586;605;611;629;643;645;654;659;660
203	LS411N	RPMI001	large_intestine	carcinoma	adenocarcinoma	345;498;555;575;605;611;629;643;645;654;659;660
204	LS513	RPMI001	large_intestine	carcinoma	adenocarcinoma	3;108;249;446;528;560;586;605;611;629;643;645;654;659;660
205	MDST8	DMEM005	large_intestine	carcinoma	adenocarcinoma	206;419;462;504;511;600;609;624;631;638;647;651;657;660
206	NCIH508	RPMI001	large_intestine	carcinoma	adenocarcinoma	265;469;540;574;591;598;616;630;643;645;654;659;660
207	NCIH747	RPMI001	large_intestine	carcinoma	adenocarcinoma	404;489;562;590;593;615;624;631;638;647;651;657;660
208	OUMS23	DMEM001	large_intestine	carcinoma	adenocarcinoma	385;533;604;615;624;631;638;647;651;657;660
209	RCM1	RPMIF12001	large_intestine	carcinoma	adenocarcinoma	314;363;420;477;530;545;584;595;609;624;631;638;647;651;657;660
210	RKO	MEM001	large_intestine	carcinoma	adenocarcinoma	92;296;379;480;556;569;601;604;615;624;631;638;647;651;657;660
211	SKCO1	EMEM001	large_intestine	carcinoma	adenocarcinoma	150;249;446;528;560;586;605;611;629;643;645;654;659;660
212	SNU1033	RPMI001	large_intestine	carcinoma		437;516;590;593;615;624;631;638;647;651;657;660
213	SNU1040	RPMI001	large_intestine	carcinoma		142;258;414;502;556;569;601;604;615;624;631;638;647;651;657;660
214	SNU283	RPMI001	large_intestine	carcinoma		140;320;412;477;530;545;584;595;609;624;631;638;647;651;657;660
215	SNU407	RPMI001	large_intestine	carcinoma		45;125;173;319;379;480;556;569;601;604;615;624;631;638;647;651;657;660
216	SNU503	RPMI001	large_intestine	carcinoma		391;427;532;547;584;595;609;624;631;638;647;651;657;660
217	SNU61	RPMI001	large_intestine	carcinoma		348;476;528;560;586;605;611;629;643;645;654;659;660
218	SNU81	RPMI001	large_intestine	carcinoma		648;656;661;662
219	SNUC2A	RPMI001	large_intestine	carcinoma	adenocarcinoma	237;355;481;538;559;591;598;616;630;643;645;654;659;660
220	SNUC4	RPMI001	large_intestine	carcinoma	adenocarcinoma	250;352;455;557;596;619;629;643;645;654;659;660
221	SNUC5	RPMI001	large_intestine	carcinoma	adenocarcinoma	156;284;406;485;542;567;600;609;624;631;638;647;651;657;660
222	SW1116	RPMI001	large_intestine	carcinoma	adenocarcinoma	621;649;652;655;657;660
223	SW1417	RPMI001	large_intestine	carcinoma	adenocarcinoma	323;357;494;545;584;595;609;624;631;638;647;651;657;660
224	SW1463	RPMI001	large_intestine	carcinoma	adenocarcinoma	639;648;656;661;662
225	SW403	RPMI001	large_intestine	carcinoma	adenocarcinoma	153;269;405;434;476;528;560;586;605;611;629;643;645;654;659;660
226	SW48	RPMI001	large_intestine	carcinoma	adenocarcinoma	150;249;446;528;560;586;605;611;629;643;645;654;659;660
227	SW620	L15001	large_intestine	carcinoma	adenocarcinoma	168;297;451;529;581;583;611;629;643;645;654;659;660
228	SW837	RPMI001	large_intestine	carcinoma	adenocarcinoma	20;482;633;647;651;657;660
229	SW948	RPMI001	large_intestine	carcinoma	adenocarcinoma	320;412;477;530;545;584;595;609;624;631;638;647;651;657;660
230	T84	DMEMF12003	large_intestine	carcinoma	adenocarcinoma	171;338;421;489;562;590;593;615;624;631;638;647;651;657;660
231	HEP3B217	EMEM001	liver	carcinoma	hepatocellular_carcinoma	416;429;581;583;611;629;643;645;654;659;660
232	HEPG2	DMEM001	liver	carcinoma	hepatocellular_carcinoma	512;575;605;611;629;643;645;654;659;660
233	HLF	DMEM009	liver	carcinoma	hepatocellular_carcinoma	61;117;246;331;395;464;514;539;569;601;604;615;624;631;638;647;651;657;660
234	HUH1	DMEM001	liver	carcinoma	hepatocellular_carcinoma	332;394;490;558;595;609;624;631;638;647;651;657;660
235	HUH6	DMEM001	liver		hepatoblastoma	565;601;604;615;624;631;638;647;651;657;660
236	JHH1	WILLIAMSE001	liver	carcinoma	hepatocellular_carcinoma	188;240;363;420;477;530;545;584;595;609;624;631;638;647;651;657;660
237	JHH2	EMEM001	liver	carcinoma	hepatocellular_carcinoma	192;315;412;477;530;545;584;595;609;624;631;638;647;651;657;660
238	JHH4	EMEM001	liver	carcinoma	hepatocellular_carcinoma	111;291;326;501;530;545;584;595;609;624;631;638;647;651;657;660
239	JHH5	WILLIAMSE001	liver	carcinoma	hepatocellular_carcinoma	360;396;510;527;588;623;631;638;647;651;657;660
240	JHH6	WILLIAMSE001	liver	carcinoma	hepatocellular_carcinoma	585;617;650;659;660
241	LI7	RPMI001	liver	carcinoma	hepatocellular_carcinoma	343;366;454;538;559;591;598;616;630;643;645;654;659;660
242	PLCPRF5	EMEM001	liver	carcinoma	hepatocellular_carcinoma	93;268;402;450;506;570;599;634;646;651;657;660
243	SKHEP1	EMEM001	liver	carcinoma	adenocarcinoma	157;211;307;390;474;570;599;634;646;651;657;660
244	SNU182	RPMI001	liver	carcinoma	hepatocellular_carcinoma	183;261;318;443;500;537;550;572;602;608;627;636;646;651;657;660
245	SNU387	RPMI001	liver	carcinoma	hepatocellular_carcinoma	391;427;532;547;584;595;609;624;631;638;647;651;657;660
246	SNU398	RPMI001	liver	carcinoma	hepatocellular_carcinoma	606;612;630;643;645;654;659;660
247	SNU423	RPMI001	liver	carcinoma	hepatocellular_carcinoma	38;50;175;207;294;383;459;464;514;539;569;601;604;615;624;631;638;647;651;657;660
248	SNU449	RPMI001	liver	carcinoma	hepatocellular_carcinoma	176;315;412;477;530;545;584;595;609;624;631;638;647;651;657;660
249	SNU475	RPMI001	liver	carcinoma	hepatocellular_carcinoma	482;633;647;651;657;660
250	SNU761	RPMI001	liver	carcinoma	hepatocellular_carcinoma	311;439;499;567;600;609;624;631;638;647;651;657;660
251	SNU878	RPMI001	liver	carcinoma	hepatocellular_carcinoma	343;366;454;538;559;591;598;616;630;643;645;654;659;660
252	SNU886	RPMI001	liver	carcinoma	hepatocellular_carcinoma	612;630;643;645;654;659;660
253	A549	DMEM001	lung	carcinoma	non_small_cell_carcinoma	401;470;555;575;605;611;629;643;645;654;659;660
254	BEN	DMEM001	lung	carcinoma		637;653;658;662
255	CAL12T	DMEM001	lung	carcinoma	non_small_cell_carcinoma	251;430;523;574;591;598;616;630;643;645;654;659;660
256	CALU1	MCCOYS5A001	lung	carcinoma	squamous_cell_carcinoma	407;580;623;631;638;647;651;657;660
257	CALU3	EMEM001	lung	carcinoma	adenocarcinoma	244;340;417;521;550;572;602;608;627;636;646;651;657;660
258	CALU6	MEM001	lung	carcinoma	undifferentiated_carcinoma	191;354;386;457;529;581;583;611;629;643;645;654;659;660
259	CHAGOK1	RPMI007	lung	carcinoma		100;190;294;383;459;464;514;539;569;601;604;615;624;631;638;647;651;657;660
260	COLO668	RPMI007	lung	carcinoma	small_cell_carcinoma	86;190;294;383;459;464;514;539;569;601;604;615;624;631;638;647;651;657;660
261	COLO699	RPMI001				237;355;481;538;559;591;598;616;630;643;645;654;659;660
262	CORL105	RPMI007	lung	carcinoma	adenocarcinoma	257;396;510;527;588;623;631;638;647;651;657;660
263	CORL95	RPMI007	lung	carcinoma	small_cell_carcinoma	232;479;553;573;607;628;638;647;651;657;660
264	DMS114	WAYMOUTH002	lung	carcinoma	small_cell_carcinoma	42;187;267;349;411;459;464;514;539;569;601;604;615;624;631;638;647;651;657;660
265	DMS273	WAYMOUTH001	lung	carcinoma	small_cell_carcinoma	53;122;202;239;350;383;459;464;514;539;569;601;604;615;624;631;638;647;651;657;660
266	DMS454	WAYMOUTH002	lung	carcinoma	small_cell_carcinoma	403;553;573;607;628;638;647;651;657;660
267	DMS53	WAYMOUTH002	lung	carcinoma	small_cell_carcinoma	403;553;573;607;628;638;647;651;657;660
268	DV90	RPMI001	lung	carcinoma	adenocarcinoma	127;208;219;369;444;514;539;569;601;604;615;624;631;638;647;651;657;660
269	EBC1	MEM001	lung	carcinoma	squamous_cell_carcinoma	328;460;485;542;567;600;609;624;631;638;647;651;657;660
270	EKVX	RPMI005				453;526;580;623;631;638;647;651;657;660
271	EPLC272H	RPMI003	lung	carcinoma	squamous_cell_carcinoma	241;399;503;551;565;601;604;615;624;631;638;647;651;657;660
272	HARA	RPMI001	lung	carcinoma	squamous_cell_carcinoma	44;185;223;366;454;538;559;591;598;616;630;643;645;654;659;660
273	HCC1171	RPMI001	lung	carcinoma	non_small_cell_carcinoma	544;576;594;602;608;627;636;646;651;657;660
274	HCC1195	RPMI001	lung	carcinoma	mixed_adenosquamous_carcinoma	284;406;485;542;567;600;609;624;631;638;647;651;657;660
275	HCC1438	RPMI001	lung	carcinoma	large_cell_carcinoma	22;55;135;233;281;331;395;464;514;539;569;601;604;615;624;631;638;647;651;657;660
276	HCC15	RPMI001	lung	carcinoma	squamous_cell_carcinoma	223;366;454;538;559;591;598;616;630;643;645;654;659;660
277	HCC1588	RPMI001	lung	carcinoma	squamous_cell_carcinoma	3;108;249;446;528;560;586;605;611;629;643;645;654;659;660
278	HCC1833	RPMI001	lung	carcinoma	adenocarcinoma	355;481;538;559;591;598;616;630;643;645;654;659;660
279	HCC2108	RPMI001	lung	carcinoma	adenocarcinoma	153;269;405;434;476;528;560;586;605;611;629;643;645;654;659;660
280	HCC2279	RPMI001	lung	carcinoma	adenocarcinoma	105;261;318;443;500;537;550;572;602;608;627;636;646;651;657;660
281	HCC2935	RPMI001	lung	carcinoma	non_small_cell_carcinoma	526;580;623;631;638;647;651;657;660
282	HCC33	RPMI003	lung	carcinoma	small_cell_carcinoma	661;662
283	HCC366	RPMI001	lung	carcinoma	mixed_adenosquamous_carcinoma	63;203;260;374;484;520;586;605;611;629;643;645;654;659;660
284	HCC4006	RPMI001	lung	carcinoma	adenocarcinoma	360;396;510;527;588;623;631;638;647;651;657;660
285	HCC44	RPMI001	lung	carcinoma	adenocarcinoma	131;189;274;400;454;538;559;591;598;616;630;643;645;654;659;660
286	HCC78	RPMI001	lung	carcinoma	adenocarcinoma	174;384;432;484;520;586;605;611;629;643;645;654;659;660
287	HCC827	RPMI001	lung	carcinoma	adenocarcinoma	198;469;540;574;591;598;616;630;643;645;654;659;660
288	HCC95	RPMI001	lung	carcinoma	squamous_cell_carcinoma	209;367;472;507;540;574;591;598;616;630;643;645;654;659;660
289	HOP62	RPMI005				312;404;489;562;590;593;615;624;631;638;647;651;657;660
290	HOP92	RPMI005				407;580;623;631;638;647;651;657;660
291	IALM	HAMSF10001	lung	carcinoma	large_cell_carcinoma	578;610;628;638;647;651;657;660
292	KNS62	EMEM005	lung	carcinoma	squamous_cell_carcinoma	81;170;346;468;587;599;634;646;651;657;660
293	LC1SQSF	RPMI001	lung	carcinoma	squamous_cell_carcinoma	147;378;547;584;595;609;624;631;638;647;651;657;660
294	LCLC103H	RPMI001	lung	carcinoma	large_cell_carcinoma	253;432;484;520;586;605;611;629;643;645;654;659;660
295	LCLC97TM1	RPMI003	lung	carcinoma	large_cell_carcinoma	154;275;329;423;480;556;569;601;604;615;624;631;638;647;651;657;660
296	LK2	RPMI001	lung	carcinoma	squamous_cell_carcinoma	137;350;383;459;464;514;539;569;601;604;615;624;631;638;647;651;657;660
297	LOUNH91	RPMI001	lung	carcinoma	squamous_cell_carcinoma	276;435;511;600;609;624;631;638;647;651;657;660
298	LU99	RPMI001	lung	carcinoma	large_cell_carcinoma	44;185;223;366;454;538;559;591;598;616;630;643;645;654;659;660
299	LUDLU1	RPMI001	lung	carcinoma	squamous_cell_carcinoma	230;369;444;514;539;569;601;604;615;624;631;638;647;651;657;660
300	LXF289	HAMSF10001	lung	carcinoma	adenocarcinoma	77;193;335;419;462;504;511;600;609;624;631;638;647;651;657;660
301	MORCPR	RPMI001	lung	carcinoma	adenocarcinoma	102;148;271;384;432;484;520;586;605;611;629;643;645;654;659;660
302	NCIH1155	DMEMF12003	lung	carcinoma	large_cell_carcinoma	56;97;177;359;546;587;599;634;646;651;657;660
303	NCIH1184	RPMI001	lung	carcinoma	small_cell_carcinoma	199;377;460;485;542;567;600;609;624;631;638;647;651;657;660
304	NCIH1299	RPMI001	lung	carcinoma	non_small_cell_carcinoma	103;205;289;408;447;522;564;603;627;636;646;651;657;660
305	NCIH1339	RPMI003	lung	carcinoma	small_cell_carcinoma	18;34;117;246;331;395;464;514;539;569;601;604;615;624;631;638;647;651;657;660
306	NCIH1341	RPMI005	lung	carcinoma	small_cell_carcinoma	113;169;288;333;475;513;552;589;607;628;638;647;651;657;660
307	NCIH1355	RPMI005	lung	carcinoma	adenocarcinoma	151;275;329;423;480;556;569;601;604;615;624;631;638;647;651;657;660
308	NCIH1373	RPMI003	lung	carcinoma	adenocarcinoma	158;234;313;381;465;520;586;605;611;629;643;645;654;659;660
309	NCIH1395	RPMI001	lung	carcinoma	adenocarcinoma	483;524;593;615;624;631;638;647;651;657;660
310	NCIH1435	RPMI001	lung	carcinoma	non_small_cell_carcinoma	442;504;511;600;609;624;631;638;647;651;657;660
311	NCIH1563	RPMI001	lung	carcinoma	adenocarcinoma	571;613;626;644;655;657;660
312	NCIH1568	RPMI001	lung	carcinoma	non_small_cell_carcinoma	112;218;349;411;459;464;514;539;569;601;604;615;624;631;638;647;651;657;660
313	NCIH1573	RPMI005	lung	carcinoma	adenocarcinoma	551;565;601;604;615;624;631;638;647;651;657;660
314	NCIH1581	DMEMF12003	lung	carcinoma	large_cell_carcinoma	177;359;546;587;599;634;646;651;657;660
315	NCIH1623	RPMI001	lung	carcinoma	adenocarcinoma	280;527;588;623;631;638;647;651;657;660
316	NCIH1650	RPMI001	lung	carcinoma	bronchioloalveolar_adenocarcinoma	212;372;467;517;576;594;602;608;627;636;646;651;657;660
317	NCIH1651	RPMI001	lung	carcinoma	adenocarcinoma	539;569;601;604;615;624;631;638;647;651;657;660
318	NCIH1666	RPMI005	lung	carcinoma	bronchioloalveolar_adenocarcinoma	292;448;499;567;600;609;624;631;638;647;651;657;660
319	NCIH1693	RPMI005	lung	carcinoma	adenocarcinoma	478;536;566;589;607;628;638;647;651;657;660
320	NCIH1703	RPMI001	lung	carcinoma	adenocarcinoma	35;79;263;373;409;566;589;607;628;638;647;651;657;660
321	NCIH1734	RPMI001	lung	carcinoma	adenocarcinoma	351;505;541;592;632;641;654;659;660
322	NCIH1755	RPMI001	lung	carcinoma	adenocarcinoma	473;508;561;594;602;608;627;636;646;651;657;660
323	NCIH1781	RPMI001	lung	carcinoma	bronchioloalveolar_adenocarcinoma	277;341;462;504;511;600;609;624;631;638;647;651;657;660
324	NCIH1792	RPMI001	lung	carcinoma	adenocarcinoma	126;258;414;502;556;569;601;604;615;624;631;638;647;651;657;660
325	NCIH1793	DMEMF12002	lung	carcinoma	non_small_cell_carcinoma	606;612;630;643;645;654;659;660
326	NCIH1838	RPMI001	lung	carcinoma	non_small_cell_carcinoma	279;340;417;521;550;572;602;608;627;636;646;651;657;660
327	NCIH1869	RPMI001	lung	carcinoma	squamous_cell_carcinoma	303;342;483;524;593;615;624;631;638;647;651;657;660
328	NCIH1915	RPMI011	lung	carcinoma	large_cell_carcinoma	245;314;363;420;477;530;545;584;595;609;624;631;638;647;651;657;660
329	NCIH1944	RPMI001	lung	carcinoma	non_small_cell_carcinoma	167;230;369;444;514;539;569;601;604;615;624;631;638;647;651;657;660
330	NCIH196	RPMI001	lung	carcinoma	small_cell_carcinoma	238;426;523;574;591;598;616;630;643;645;654;659;660
331	NCIH1975	RPMI001	lung	carcinoma	non_small_cell_carcinoma	563;616;630;643;645;654;659;660
332	NCIH2009	RPMI001	lung	carcinoma	adenocarcinoma	274;400;454;538;559;591;598;616;630;643;645;654;659;660
333	NCIH2023	DMEMF12002	lung	carcinoma	adenocarcinoma	247;392;512;575;605;611;629;643;645;654;659;660
334	NCIH2029	DMEMF12002	lung	carcinoma	small_cell_carcinoma	272;449;486;558;595;609;624;631;638;647;651;657;660
335	NCIH2030	RPMI001	lung	carcinoma	non_small_cell_carcinoma	222;365;445;521;550;572;602;608;627;636;646;651;657;660
336	NCIH2073	RPMI001	lung	carcinoma	adenocarcinoma	142;258;414;502;556;569;601;604;615;624;631;638;647;651;657;660
337	NCIH2085	RPMI005	lung	carcinoma	adenocarcinoma	508;561;594;602;608;627;636;646;651;657;660
338	NCIH2087	RPMI005	lung	carcinoma	adenocarcinoma	133;292;448;499;567;600;609;624;631;638;647;651;657;660
339	NCIH211	RPMI001	lung	carcinoma	small_cell_carcinoma	88;144;186;260;374;484;520;586;605;611;629;643;645;654;659;660
340	NCIH2110	RPMI001	lung	carcinoma	non_small_cell_carcinoma	52;101;161;197;208;219;369;444;514;539;569;601;604;615;624;631;638;647;651;657;660
341	NCIH2122	RPMI001	lung	carcinoma	adenocarcinoma	380;414;502;556;569;601;604;615;624;631;638;647;651;657;660
342	NCIH2126	DMEMF12002	lung	carcinoma	adenocarcinoma	160;287;335;419;462;504;511;600;609;624;631;638;647;651;657;660
343	NCIH2170	RPMI001	lung	carcinoma	squamous_cell_carcinoma	178;280;527;588;623;631;638;647;651;657;660
344	NCIH2172	RPMI001	lung	carcinoma	non_small_cell_carcinoma	336;496;583;611;629;643;645;654;659;660
345	NCIH2196	DMEMF12002	lung	carcinoma	small_cell_carcinoma	232;479;553;573;607;628;638;647;651;657;660
346	NCIH2228	RPMI001	lung	carcinoma	adenocarcinoma	362;542;567;600;609;624;631;638;647;651;657;660
347	NCIH226	RPMI001	lung	carcinoma	squamous_cell_carcinoma	229;362;542;567;600;609;624;631;638;647;651;657;660
348	NCIH2286	RPMI001	lung	carcinoma	small_cell_carcinoma	531;598;616;630;643;645;654;659;660
349	NCIH2291	RPMI001	lung	carcinoma	adenocarcinoma	582;608;627;636;646;651;657;660
350	NCIH23	RPMI001	lung	carcinoma	non_small_cell_carcinoma	14;64;107;281;331;395;464;514;539;569;601;604;615;624;631;638;647;651;657;660
351	NCIH2342	RPMI004	lung	carcinoma	adenocarcinoma	300;342;483;524;593;615;624;631;638;647;651;657;660
352	NCIH2405	RPMI001	lung	carcinoma	adenocarcinoma	309;415;465;520;586;605;611;629;643;645;654;659;660
353	NCIH2444	RPMI001	lung	carcinoma	non_small_cell_carcinoma	436;613;626;644;655;657;660
354	NCIH292	RPMI001	lung	carcinoma	mucoepidermoid_carcinoma	119;422;500;537;550;572;602;608;627;636;646;651;657;660
355	NCIH322	RPMI007	lung	carcinoma	adenocarcinoma	124;219;369;444;514;539;569;601;604;615;624;631;638;647;651;657;660
356	NCIH358	RPMI001	lung	carcinoma	bronchioloalveolar_adenocarcinoma	185;223;366;454;538;559;591;598;616;630;643;645;654;659;660
357	NCIH441	RPMI001	lung	carcinoma	adenocarcinoma	435;511;600;609;624;631;638;647;651;657;660
358	NCIH446	RPMI001	lung	carcinoma	small_cell_carcinoma	116;259;393;423;480;556;569;601;604;615;624;631;638;647;651;657;660
359	NCIH460	RPMI001	lung	carcinoma	large_cell_carcinoma	254;468;587;599;634;646;651;657;660
360	NCIH520	RPMI001	lung	carcinoma	squamous_cell_carcinoma	57;270;393;423;480;556;569;601;604;615;624;631;638;647;651;657;660
361	NCIH522	RPMI001	lung	carcinoma	non_small_cell_carcinoma	50;175;207;294;383;459;464;514;539;569;601;604;615;624;631;638;647;651;657;660
362	NCIH596	RPMI001	lung	carcinoma	mixed_adenosquamous_carcinoma	254;468;587;599;634;646;651;657;660
363	NCIH647	RPMI001	lung	carcinoma	mixed_adenosquamous_carcinoma	130;195;285;395;464;514;539;569;601;604;615;624;631;638;647;651;657;660
364	NCIH650	RPMI001	lung	carcinoma	bronchioloalveolar_adenocarcinoma	293;309;415;465;520;586;605;611;629;643;645;654;659;660
365	NCIH661	RPMI005	lung	carcinoma	large_cell_carcinoma	125;173;319;379;480;556;569;601;604;615;624;631;638;647;651;657;660
366	NCIH69	RPMI001	lung	carcinoma	small_cell_carcinoma	180;308;374;484;520;586;605;611;629;643;645;654;659;660
367	NCIH727	RPMI001	lung	carcinoid_endocrine_tumor		306;434;476;528;560;586;605;611;629;643;645;654;659;660
368	NCIH810	DMEMF12002	lung	carcinoma	large_cell_carcinoma	100;190;294;383;459;464;514;539;569;601;604;615;624;631;638;647;651;657;660
369	NCIH838	RPMI001	lung	carcinoma	non_small_cell_carcinoma	112;218;349;411;459;464;514;539;569;601;604;615;624;631;638;647;651;657;660
370	NCIH841	DMEMF12002	lung	carcinoma	small_cell_carcinoma	25;36;85;239;350;383;459;464;514;539;569;601;604;615;624;631;638;647;651;657;660
371	PC14	RPMI001	lung	carcinoma	non_small_cell_carcinoma	198;469;540;574;591;598;616;630;643;645;654;659;660
372	RERFLCAD1	RPMI001	lung	carcinoma	adenocarcinoma	617;650;659;660
373	RERFLCAD2	RPMI001	lung	carcinoma	adenocarcinoma	165;368;378;547;584;595;609;624;631;638;647;651;657;660
374	RERFLCAI	EMEM001	lung	carcinoma	squamous_cell_carcinoma	2;97;177;359;546;587;599;634;646;651;657;660
375	RERFLCMS	EMEM001	lung	carcinoma	non_small_cell_carcinoma	25;36;85;239;350;383;459;464;514;539;569;601;604;615;624;631;638;647;651;657;660
376	SBC5	EMEM001	lung	carcinoma	small_cell_carcinoma	359;546;587;599;634;646;651;657;660
377	SKLU1	MEM001	lung	carcinoma	adenocarcinoma	297;451;529;581;583;611;629;643;645;654;659;660
378	SKMES1	DMEM001	lung	carcinoma	squamous_cell_carcinoma	41;69;197;208;219;369;444;514;539;569;601;604;615;624;631;638;647;651;657;660
379	SQ1	RPMI001	lung	carcinoma	squamous_cell_carcinoma	473;508;561;594;602;608;627;636;646;651;657;660
380	SW1271	RPMI001	lung	carcinoma	small_cell_carcinoma	311;439;499;567;600;609;624;631;638;647;651;657;660
381	SW1573	L15001	lung	carcinoma	squamous_cell_carcinoma	634;646;651;657;660
382	T3M10	HAMSF12001	lung	carcinoma	large_cell_carcinoma	427;532;547;584;595;609;624;631;638;647;651;657;660
383	VMRCLCD	MEM001	lung	carcinoma	adenocarcinoma	122;202;239;350;383;459;464;514;539;569;601;604;615;624;631;638;647;651;657;660
384	COLO680N	RPMI001	oesophagus	carcinoma	squamous_cell_carcinoma	123;313;381;465;520;586;605;611;629;643;645;654;659;660
385	ECGI10	HAMSF12001	oesophagus	carcinoma		196;326;501;530;545;584;595;609;624;631;638;647;651;657;660
386	KYSE140	RPMI001	oesophagus	carcinoma	squamous_cell_carcinoma	251;430;523;574;591;598;616;630;643;645;654;659;660
387	KYSE150	RPMIF12001	oesophagus	carcinoma	squamous_cell_carcinoma	139;301;424;502;556;569;601;604;615;624;631;638;647;651;657;660
388	KYSE180	RPMI001	oesophagus	carcinoma	squamous_cell_carcinoma	6;32;148;271;384;432;484;520;586;605;611;629;643;645;654;659;660
389	KYSE30	RPMIF12001	oesophagus	carcinoma	squamous_cell_carcinoma	221;312;404;489;562;590;593;615;624;631;638;647;651;657;660
390	KYSE410	RPMI001	oesophagus	carcinoma	squamous_cell_carcinoma	151;275;329;423;480;556;569;601;604;615;624;631;638;647;651;657;660
391	KYSE450	RPMIF12001	oesophagus	carcinoma	squamous_cell_carcinoma	70;250;352;455;557;596;619;629;643;645;654;659;660
392	KYSE510	RPMI001	oesophagus	carcinoma	squamous_cell_carcinoma	170;346;468;587;599;634;646;651;657;660
393	KYSE520	RPMI001	oesophagus	carcinoma	squamous_cell_carcinoma	147;378;547;584;595;609;624;631;638;647;651;657;660
394	KYSE70	RPMI001	oesophagus	carcinoma	squamous_cell_carcinoma	77;193;335;419;462;504;511;600;609;624;631;638;647;651;657;660
395	OE19	RPMI001	oesophagus	carcinoma	adenocarcinoma	352;455;557;596;619;629;643;645;654;659;660
396	OE21	RPMI001	oesophagus	carcinoma	squamous_cell_carcinoma	30;101;161;197;208;219;369;444;514;539;569;601;604;615;624;631;638;647;651;657;660
397	OE33	RPMI001	oesophagus		metaplasia	466;536;566;589;607;628;638;647;651;657;660
398	TE1	RPMI001	oesophagus	carcinoma	squamous_cell_carcinoma	89;155;321;382;442;504;511;600;609;624;631;638;647;651;657;660
399	TE10	RPMI001	oesophagus	carcinoma	squamous_cell_carcinoma	43;158;234;313;381;465;520;586;605;611;629;643;645;654;659;660
400	TE11	RPMI001	oesophagus	carcinoma	squamous_cell_carcinoma	17;31;52;101;161;197;208;219;369;444;514;539;569;601;604;615;624;631;638;647;651;657;660
401	TE14	RPMI001	oesophagus	carcinoma	squamous_cell_carcinoma	78;124;219;369;444;514;539;569;601;604;615;624;631;638;647;651;657;660
402	TE15	RPMI001	oesophagus	carcinoma	squamous_cell_carcinoma	30;101;161;197;208;219;369;444;514;539;569;601;604;615;624;631;638;647;651;657;660
403	TE4	RPMI001	oesophagus	carcinoma	squamous_cell_carcinoma	145;367;472;507;540;574;591;598;616;630;643;645;654;659;660
404	TE5	RPMI001	oesophagus	carcinoma	squamous_cell_carcinoma	86;190;294;383;459;464;514;539;569;601;604;615;624;631;638;647;651;657;660
405	TE6	RPMI001	oesophagus	carcinoma	squamous_cell_carcinoma	145;367;472;507;540;574;591;598;616;630;643;645;654;659;660
406	TE8	RPMI001	oesophagus	carcinoma	squamous_cell_carcinoma	54;236;266;439;499;567;600;609;624;631;638;647;651;657;660
407	TE9	RPMI001	oesophagus	carcinoma	squamous_cell_carcinoma	6;32;148;271;384;432;484;520;586;605;611;629;643;645;654;659;660
408	A2780	RPMI001	ovary	carcinoma	adenocarcinoma	118;270;393;423;480;556;569;601;604;615;624;631;638;647;651;657;660
409	CAOV3	DMEM001	ovary	carcinoma	adenocarcinoma	256;328;460;485;542;567;600;609;624;631;638;647;651;657;660
410	COV318	DMEM005	ovary	carcinoma		286;497;557;596;619;629;643;645;654;659;660
411	COV362	DMEM005	ovary	carcinoma		413;490;558;595;609;624;631;638;647;651;657;660
412	COV434	DMEM005	ovary	sex_cord_stromal_tumor	granulosa_cell_tumor	42;187;267;349;411;459;464;514;539;569;601;604;615;624;631;638;647;651;657;660
413	COV644	DMEM005	ovary	carcinoma		370;486;558;595;609;624;631;638;647;651;657;660
414	DOV13	RPMI001				110;299;488;522;564;603;627;636;646;651;657;660
415	EFO21	RPMI010	ovary	carcinoma	serous_carcinoma	58;74;215;285;395;464;514;539;569;601;604;615;624;631;638;647;651;657;660
416	EFO27	RPMI010	ovary	carcinoma	mucinous_carcinoma	176;315;412;477;530;545;584;595;609;624;631;638;647;651;657;660
417	ES2	RPMI001	ovary	carcinoma	clear_cell_carcinoma	110;299;488;522;564;603;627;636;646;651;657;660
418	FUOV1	DMEMF12006	ovary	carcinoma	serous_carcinoma	517;576;594;602;608;627;636;646;651;657;660
419	HEYA8	EMEM003	ovary	carcinoma		67;168;297;451;529;581;583;611;629;643;645;654;659;660
420	IGROV1	RPMI001	ovary	carcinoma	adenocarcinoma	216;399;503;551;565;601;604;615;624;631;638;647;651;657;660
421	JHOC5	DMEMF12004	ovary	carcinoma	clear_cell_carcinoma	181;234;313;381;465;520;586;605;611;629;643;645;654;659;660
422	JHOM1	DMEMF12004	ovary	carcinoma	adenocarcinoma	302;495;532;547;584;595;609;624;631;638;647;651;657;660
423	JHOS2	DMEMF12003	ovary	carcinoma	adenocarcinoma	224;324;389;420;477;530;545;584;595;609;624;631;638;647;651;657;660
424	KURAMOCHI	RPMI001	ovary	carcinoma	undifferentiated_carcinoma	337;443;500;537;550;572;602;608;627;636;646;651;657;660
425	MCAS	EMEM005	ovary	carcinoma	adenocarcinoma	84;235;319;379;480;556;569;601;604;615;624;631;638;647;651;657;660
426	OAW28	DMEM007	ovary	carcinoma		300;342;483;524;593;615;624;631;638;647;651;657;660
427	OAW42	DMEM007	ovary	carcinoma		246;331;395;464;514;539;569;601;604;615;624;631;638;647;651;657;660
428	OC314	RPMI005	ovary	carcinoma	serous_carcinoma	22;55;135;233;281;331;395;464;514;539;569;601;604;615;624;631;638;647;651;657;660
429	ONCODG1	RPMI001	ovary	carcinoma	adenocarcinoma	63;203;260;374;484;520;586;605;611;629;643;645;654;659;660
430	OV56	DMEMF12005	ovary	carcinoma		330;390;474;570;599;634;646;651;657;660
431	OV7	DMEMF12007	ovary	carcinoma		339;475;513;552;589;607;628;638;647;651;657;660
432	OV90	MCDB001	ovary	carcinoma	mixed_carcinoma	305;458;494;545;584;595;609;624;631;638;647;651;657;660
433	OVCAR4	RPMI001	ovary	carcinoma		386;457;529;581;583;611;629;643;645;654;659;660
434	OVCAR5	RPMI005				221;312;404;489;562;590;593;615;624;631;638;647;651;657;660
435	OVCAR8	RPMI001	ovary	carcinoma		59;235;319;379;480;556;569;601;604;615;624;631;638;647;651;657;660
436	OVISE	RPMI001	ovary	carcinoma	clear_cell_carcinoma	299;488;522;564;603;627;636;646;651;657;660
437	OVK18	MEM001	ovary	carcinoma	endometrioid_carcinoma	98;138;199;377;460;485;542;567;600;609;624;631;638;647;651;657;660
438	OVKATE	RPMI001	ovary	carcinoma	adenocarcinoma	216;399;503;551;565;601;604;615;624;631;638;647;651;657;660
439	OVMANA	RPMI001	ovary	carcinoma	clear_cell_carcinoma	179;303;342;483;524;593;615;624;631;638;647;651;657;660
440	OVSAHO	RPMI001	ovary	carcinoma	adenocarcinoma	337;443;500;537;550;572;602;608;627;636;646;651;657;660
441	OVTOKO	RPMI001	ovary	carcinoma	clear_cell_carcinoma	231;358;445;521;550;572;602;608;627;636;646;651;657;660
442	RMGI	HAMSF12001	ovary	carcinoma	clear_cell_carcinoma	141;382;442;504;511;600;609;624;631;638;647;651;657;660
443	RMUGS	HAMSF12001	ovary	carcinoma	adenocarcinoma	141;382;442;504;511;600;609;624;631;638;647;651;657;660
444	SKOV3	MCCOYS5A001	ovary	carcinoma	adenocarcinoma	277;341;462;504;511;600;609;624;631;638;647;651;657;660
445	SNU119	RPMI001	ovary	carcinoma	adenocarcinoma	279;340;417;521;550;572;602;608;627;636;646;651;657;660
446	SNU8	RPMI001	ovary	carcinoma	adenocarcinoma	21;149;204;381;465;520;586;605;611;629;643;645;654;659;660
447	SNU840	RPMI001	ovary	carcinoma	Brenner_tumor	509;561;594;602;608;627;636;646;651;657;660
448	TOV112D	MCDB002	ovary	carcinoma	endometrioid_carcinoma	106;233;281;331;395;464;514;539;569;601;604;615;624;631;638;647;651;657;660
449	TOV21G	MCDB001	ovary	carcinoma	clear_cell_carcinoma	474;570;599;634;646;651;657;660
450	TYKNU	EMEM001	ovary	carcinoma	undifferentiated_carcinoma	67;168;297;451;529;581;583;611;629;643;645;654;659;660
451	ASPC1	RPMI001	pancreas	carcinoma	ductal_carcinoma	140;320;412;477;530;545;584;595;609;624;631;638;647;651;657;660
452	BXPC3	RPMI001	pancreas	carcinoma	ductal_carcinoma	189;274;400;454;538;559;591;598;616;630;643;645;654;659;660
453	CAPAN1	IMDM003	pancreas	carcinoma	ductal_carcinoma	316;433;478;536;566;589;607;628;638;647;651;657;660
454	CAPAN2	MCCOYS5A001	pancreas	carcinoma	ductal_carcinoma	376;421;489;562;590;593;615;624;631;638;647;651;657;660
455	CFPAC1	DMEM001	pancreas	carcinoma	ductal_carcinoma	401;470;555;575;605;611;629;643;645;654;659;660
456	DANG	RPMI001	pancreas	carcinoma		213;441;497;557;596;619;629;643;645;654;659;660
457	HPAC	DMEMF12002	pancreas	carcinoma	ductal_carcinoma	392;512;575;605;611;629;643;645;654;659;660
458	HPAFII	EMEM001	pancreas	carcinoma	ductal_carcinoma	344;365;445;521;550;572;602;608;627;636;646;651;657;660
459	HS766T	DMEM001	pancreas	carcinoma	ductal_carcinoma	437;516;590;593;615;624;631;638;647;651;657;660
460	HUPT3	MEM001	pancreas	carcinoma		324;389;420;477;530;545;584;595;609;624;631;638;647;651;657;660
461	HUPT4	MEM001	pancreas	carcinoma		166;256;328;460;485;542;567;600;609;624;631;638;647;651;657;660
462	KP2	RPMI001	pancreas	carcinoma		188;240;363;420;477;530;545;584;595;609;624;631;638;647;651;657;660
463	KP3	RPMI001	pancreas	carcinoma	ductal_carcinoma	348;476;528;560;586;605;611;629;643;645;654;659;660
464	KP4	DMEMF12003	pancreas	carcinoma	ductal_carcinoma	56;97;177;359;546;587;599;634;646;651;657;660
465	L33	RPMI001	pancreas	carcinoma		296;379;480;556;569;601;604;615;624;631;638;647;651;657;660
466	MIAPACA2	DMEM001	pancreas	carcinoma	ductal_carcinoma	7;19;64;107;281;331;395;464;514;539;569;601;604;615;624;631;638;647;651;657;660
467	PANC0203	RPMI009	pancreas	carcinoma		240;363;420;477;530;545;584;595;609;624;631;638;647;651;657;660
468	PANC0327	RPMI009	pancreas	carcinoma	ductal_carcinoma	34;117;246;331;395;464;514;539;569;601;604;615;624;631;638;647;651;657;660
469	PANC0403	RPMI009	pancreas	carcinoma		136;245;314;363;420;477;530;545;584;595;609;624;631;638;647;651;657;660
470	PANC0504	RPMI001	pancreas	carcinoma		321;382;442;504;511;600;609;624;631;638;647;651;657;660
471	PANC0813	RPMI020	pancreas	carcinoma	ductal_carcinoma	146;301;424;502;556;569;601;604;615;624;631;638;647;651;657;660
472	PANC1	DMEM001	pancreas	carcinoma	ductal_carcinoma	548;618;644;655;657;660
473	PANC1005	RPMI006	pancreas	carcinoma	ductal_carcinoma	171;338;421;489;562;590;593;615;624;631;638;647;651;657;660
474	PATU8902	DMEM001	pancreas	carcinoma	ductal_carcinoma	463;543;597;619;629;643;645;654;659;660
475	PATU8988S	DMEM005	pancreas	carcinoma	ductal_carcinoma	357;494;545;584;595;609;624;631;638;647;651;657;660
476	PATU8988T	DMEM001	pancreas	carcinoma	ductal_carcinoma	327;441;497;557;596;619;629;643;645;654;659;660
477	PK1	RPMI001	pancreas	carcinoma		70;250;352;455;557;596;619;629;643;645;654;659;660
478	PK45H	RPMI001	pancreas	carcinoma		165;368;378;547;584;595;609;624;631;638;647;651;657;660
479	PK59	RPMI001	pancreas	carcinoma		89;155;321;382;442;504;511;600;609;624;631;638;647;651;657;660
480	PSN1	RPMI007	pancreas	carcinoma	ductal_carcinoma	37;106;233;281;331;395;464;514;539;569;601;604;615;624;631;638;647;651;657;660
481	QGP1	RPMI001	pancreas	carcinoma		334;446;528;560;586;605;611;629;643;645;654;659;660
482	SNU213	RPMI001	pancreas	carcinoma		537;550;572;602;608;627;636;646;651;657;660
483	SNU410	RPMI001	pancreas	carcinoma		626;644;655;657;660
484	SU8686	RPMI001	pancreas	carcinoma	ductal_carcinoma	266;439;499;567;600;609;624;631;638;647;651;657;660
485	SUIT2	RPMI001	pancreas	carcinoma	ductal_carcinoma	625;637;653;658;662
486	SW1990	RPMI001	pancreas	carcinoma	ductal_carcinoma	130;195;285;395;464;514;539;569;601;604;615;624;631;638;647;651;657;660
487	TCCPAN2	RPMI001	pancreas	carcinoma		217;372;467;517;576;594;602;608;627;636;646;651;657;660
488	YAPC	RPMI001	pancreas	carcinoma		247;392;512;575;605;611;629;643;645;654;659;660
489	ACCMESO1	RPMI001	pleura	mesothelioma		447;522;564;603;627;636;646;651;657;660
490	DM3	DMEM006	pleura	mesothelioma		15;180;308;374;484;520;586;605;611;629;643;645;654;659;660
491	ISTMES1	DMEM012	pleura	mesothelioma		332;394;490;558;595;609;624;631;638;647;651;657;660
492	JL1	DMEM005	pleura	mesothelioma		492;549;571;613;626;644;655;657;660
493	MPP89	DMEM001	pleura	mesothelioma		278;466;536;566;589;607;628;638;647;651;657;660
494	MSTO211H	RPMI001	pleura	mesothelioma		377;460;485;542;567;600;609;624;631;638;647;651;657;660
495	NCIH2052	RPMI001	pleura	mesothelioma		220;397;519;572;602;608;627;636;646;651;657;660
496	NCIH2452	RPMI001	pleura	mesothelioma		317;436;613;626;644;655;657;660
497	NCIH28	RPMI001	pleura	mesothelioma		40;99;203;260;374;484;520;586;605;611;629;643;645;654;659;660
498	22RV1	RPMI001	prostate	carcinoma		132;405;434;476;528;560;586;605;611;629;643;645;654;659;660
499	DU145	EMEM001	prostate	carcinoma		46;211;307;390;474;570;599;634;646;651;657;660
500	LNCAPCLONEFGC	RPMI001	prostate	carcinoma	adenocarcinoma	53;122;202;239;350;383;459;464;514;539;569;601;604;615;624;631;638;647;651;657;660
501	PC3	F12K001	prostate	carcinoma	adenocarcinoma	255;410;471;578;610;628;638;647;651;657;660
502	VCAP	DMEM001	prostate	carcinoma	adenocarcinoma	272;449;486;558;595;609;624;631;638;647;651;657;660
503	A253	MCCOYS5A001	salivary_gland	carcinoma	mucoepidermoid_carcinoma	461;579;622;635;645;654;659;660
504	YD15	RPMI001	salivary_gland	carcinoma	mucoepidermoid_carcinoma	29;82;194;290;304;388;507;540;574;591;598;616;630;643;645;654;659;660
505	A101D	DMEM001	skin	malignant_melanoma		394;490;558;595;609;624;631;638;647;651;657;660
506	A2058	DMEM001	skin	malignant_melanoma		73;286;497;557;596;619;629;643;645;654;659;660
507	A375	DMEM001	skin	malignant_melanoma		293;309;415;465;520;586;605;611;629;643;645;654;659;660
508	C32	EMEM001	skin	malignant_melanoma		461;579;622;635;645;654;659;660
509	CJM	HAMSF10001	skin	malignant_melanoma		129;196;326;501;530;545;584;595;609;624;631;638;647;651;657;660
510	COLO679	RPMI001	skin	malignant_melanoma		51;243;389;420;477;530;545;584;595;609;624;631;638;647;651;657;660
511	COLO741	RPMI001	skin	malignant_melanoma		635;645;654;659;660
512	COLO783	RPMI001	skin	malignant_melanoma		453;526;580;623;631;638;647;651;657;660
513	COLO792	RPMI007	skin	malignant_melanoma		305;458;494;545;584;595;609;624;631;638;647;651;657;660
514	COLO800	RPMI001	skin	malignant_melanoma		95;225;425;487;577;614;640;650;659;660
515	COLO829	RPMI001	skin	malignant_melanoma		95;225;425;487;577;614;640;650;659;660
516	G361	MCCOYS5A001	skin	malignant_melanoma		128;287;335;419;462;504;511;600;609;624;631;638;647;651;657;660
517	HMCB	EMEM003	skin	malignant_melanoma		73;286;497;557;596;619;629;643;645;654;659;660
518	HS294T	DMEM001	skin	malignant_melanoma		19;64;107;281;331;395;464;514;539;569;601;604;615;624;631;638;647;651;657;660
519	HS688AT	DMEM001	skin	malignant_melanoma		548;618;644;655;657;660
520	HS839T	DMEM001	skin	malignant_melanoma		549;571;613;626;644;655;657;660
521	HS852T	DMEM002	skin	malignant_melanoma		341;462;504;511;600;609;624;631;638;647;651;657;660
522	HS895T	DMEM001	skin	malignant_melanoma		227;492;549;571;613;626;644;655;657;660
523	HS934T	DMEM001	skin	malignant_melanoma		658;662
524	HS936T	DMEM002	skin	malignant_melanoma		160;287;335;419;462;504;511;600;609;624;631;638;647;651;657;660
525	HS940T	DMEM001	skin	malignant_melanoma		525;554;618;644;655;657;660
526	HS944T	RPMI001	skin	malignant_melanoma		156;284;406;485;542;567;600;609;624;631;638;647;651;657;660
527	HT144	MCCOYS5A001	skin	malignant_melanoma		48;172;225;425;487;577;614;640;650;659;660
528	IGR1	DMEM001	skin	malignant_melanoma		248;444;514;539;569;601;604;615;624;631;638;647;651;657;660
529	IGR37	DMEM011	skin	malignant_melanoma		201;248;444;514;539;569;601;604;615;624;631;638;647;651;657;660
530	IGR39	DMEM011	skin	malignant_melanoma		413;490;558;595;609;624;631;638;647;651;657;660
531	IPC298	RPMI001	skin	malignant_melanoma		16;242;310;345;498;555;575;605;611;629;643;645;654;659;660
532	K029AX	RPMI001	skin	malignant_melanoma		201;248;444;514;539;569;601;604;615;624;631;638;647;651;657;660
533	LOXIMVI	RPMI001	skin	malignant_melanoma		354;386;457;529;581;583;611;629;643;645;654;659;660
534	MALME3M	RPMI001	skin	malignant_melanoma		640;650;659;660
535	MDAMB435S	RPMI001	skin	malignant_melanoma		191;354;386;457;529;581;583;611;629;643;645;654;659;660
536	MELHO	RPMI001	skin	malignant_melanoma		242;310;345;498;555;575;605;611;629;643;645;654;659;660
537	MELJUSO	RPMI001	skin	malignant_melanoma		59;235;319;379;480;556;569;601;604;615;624;631;638;647;651;657;660
538	MEWO	EMEM001	skin	malignant_melanoma		136;245;314;363;420;477;530;545;584;595;609;624;631;638;647;651;657;660
539	RPMI7951	DMEM001	skin	malignant_melanoma		120;325;472;507;540;574;591;598;616;630;643;645;654;659;660
540	SH4	DMEM001	skin	malignant_melanoma		577;614;640;650;659;660
541	SKMEL2	EMEM001	skin	malignant_melanoma		585;617;650;659;660
542	SKMEL24	EMEM003	skin	malignant_melanoma		487;577;614;640;650;659;660
543	SKMEL28	EMEM001	skin	malignant_melanoma		614;640;650;659;660
544	SKMEL3	MCCOYS5A003	skin	malignant_melanoma		438;524;593;615;624;631;638;647;651;657;660
545	SKMEL30	RPMI001	skin	malignant_melanoma		16;242;310;345;498;555;575;605;611;629;643;645;654;659;660
546	SKMEL31	EMEM002	skin	malignant_melanoma		353;451;529;581;583;611;629;643;645;654;659;660
547	SKMEL5	EMEM001	skin	malignant_melanoma		353;451;529;581;583;611;629;643;645;654;659;660
548	UACC257	RPMI001	skin	malignant_melanoma		375;425;487;577;614;640;650;659;660
549	UACC62	RPMI001	skin	malignant_melanoma		200;375;425;487;577;614;640;650;659;660
550	WM115	EMEM001	skin	malignant_melanoma		33;200;375;425;487;577;614;640;650;659;660
551	WM1799	RPMI001	skin	malignant_melanoma		49;206;419;462;504;511;600;609;624;631;638;647;651;657;660
552	WM2664	EMEM001	skin	malignant_melanoma		33;200;375;425;487;577;614;640;650;659;660
553	WM793	RPMI001	skin	malignant_melanoma		49;206;419;462;504;511;600;609;624;631;638;647;651;657;660
554	WM88	RPMI001	skin	malignant_melanoma		48;172;225;425;487;577;614;640;650;659;660
555	WM983B	RPMI001	skin	malignant_melanoma		172;225;425;487;577;614;640;650;659;660
556	A204	MCCOYS5A001	soft_tissue	rhabdoid_tumor		79;263;373;409;566;589;607;628;638;647;651;657;660
557	G401	MCCOYS5A001	soft_tissue	rhabdoid_tumor		38;50;175;207;294;383;459;464;514;539;569;601;604;615;624;631;638;647;651;657;660
558	G402	MCCOYS5A001	soft_tissue	rhabdoid_tumor		9;35;79;263;373;409;566;589;607;628;638;647;651;657;660
559	GCT	MCCOYS5A001	soft_tissue	malignant_fibrous_histiocytoma_pleomorphic_sarcoma		184;218;349;411;459;464;514;539;569;601;604;615;624;631;638;647;651;657;660
560	HS729	DMEM001	soft_tissue	rhabdomyosarcoma		83;184;218;349;411;459;464;514;539;569;601;604;615;624;631;638;647;651;657;660
561	HT1080	EMEM001	soft_tissue	fibrosarcoma		37;106;233;281;331;395;464;514;539;569;601;604;615;624;631;638;647;651;657;660
562	KYM1	DMEMF12003	soft_tissue	rhabdomyosarcoma		411;459;464;514;539;569;601;604;615;624;631;638;647;651;657;660
563	MESSA	MCCOYS5A001	soft_tissue	sarcoma		579;622;635;645;654;659;660
564	RD	DMEM001	soft_tissue	rhabdomyosarcoma	embryonal	14;64;107;281;331;395;464;514;539;569;601;604;615;624;631;638;647;651;657;660
565	RH18	RPMI003	soft_tissue	rhabdomyosarcoma	alveolar	154;275;329;423;480;556;569;601;604;615;624;631;638;647;651;657;660
566	RH30	RPMI001	soft_tissue	rhabdomyosarcoma	alveolar	138;199;377;460;485;542;567;600;609;624;631;638;647;651;657;660
567	RH41	RPMI001	soft_tissue	rhabdomyosarcoma	alveolar	144;186;260;374;484;520;586;605;611;629;643;645;654;659;660
568	RKN	HAMSF12001	soft_tissue	leiomyosarcoma		210;457;529;581;583;611;629;643;645;654;659;660
569	S117	RPMI001	soft_tissue	sarcoma		636;646;651;657;660
570	SKLMS1	EMEM001	soft_tissue	sarcoma		72;104;268;402;450;506;570;599;634;646;651;657;660
571	SKUT1	EMEM001	soft_tissue	leiomyosarcoma		26;65;104;268;402;450;506;570;599;634;646;651;657;660
572	TE125T	EMEM001	soft_tissue	rhabdomyosarcoma		46;211;307;390;474;570;599;634;646;651;657;660
573	TE441T	DMEM001	soft_tissue	rhabdomyosarcoma		552;589;607;628;638;647;651;657;660
574	TE617T	DMEM001	soft_tissue	rhabdomyosarcoma		69;197;208;219;369;444;514;539;569;601;604;615;624;631;638;647;651;657;660
575	2313287	RPMI001	stomach	carcinoma	adenocarcinoma	174;384;432;484;520;586;605;611;629;643;645;654;659;660
576	AGS	F12K001	stomach	carcinoma	adenocarcinoma	226;470;555;575;605;611;629;643;645;654;659;660
577	ECC10	RPMI001	stomach	carcinoma	small_cell_adenocarcinoma	214;406;485;542;567;600;609;624;631;638;647;651;657;660
578	ECC12	RPMI001	stomach	carcinoma	small_cell_adenocarcinoma	40;99;203;260;374;484;520;586;605;611;629;643;645;654;659;660
579	FU97	DMEM004	stomach	carcinoma	diffuse_adenocarcinoma	387;496;583;611;629;643;645;654;659;660
580	GSS	RPMI001	stomach	carcinoma	adenocarcinoma	88;144;186;260;374;484;520;586;605;611;629;643;645;654;659;660
581	GSU	RPMI001	stomach	carcinoma	adenocarcinoma	498;555;575;605;611;629;643;645;654;659;660
582	HGC27	MEM001	stomach	carcinoma	undifferentiated_adenocarcinoma	118;270;393;423;480;556;569;601;604;615;624;631;638;647;651;657;660
583	HS746T	DMEM001	stomach	carcinoma		143;278;466;536;566;589;607;628;638;647;651;657;660
584	IM95	DMEM001	stomach	carcinoma	intestinal_adenocarcinoma	127;208;219;369;444;514;539;569;601;604;615;624;631;638;647;651;657;660
585	KE39	RPMI001	stomach	carcinoma		159;306;434;476;528;560;586;605;611;629;643;645;654;659;660
586	LMSU	HAMSF10001	stomach	carcinoma	adenocarcinoma	263;373;409;566;589;607;628;638;647;651;657;660
587	MKN1	RPMI001	stomach	carcinoma	mixed_adenosquamous_carcinoma	431;534;564;603;627;636;646;651;657;660
588	MKN45	RPMI001	stomach	carcinoma	diffuse_adenocarcinoma	625;637;653;658;662
589	MKN7	RPMI001	stomach	carcinoma	tubular_adenocarcinoma	179;303;342;483;524;593;615;624;631;638;647;651;657;660
590	MKN74	RPMI001	stomach	carcinoma	tubular_adenocarcinoma	173;319;379;480;556;569;601;604;615;624;631;638;647;651;657;660
591	NCIN87	RPMI001	stomach	carcinoma		388;507;540;574;591;598;616;630;643;645;654;659;660
592	NUGC3	RPMI001	stomach	carcinoma		128;287;335;419;462;504;511;600;609;624;631;638;647;651;657;660
593	OCUM1	DMEM010	stomach	carcinoma	diffuse_adenocarcinoma	622;635;645;654;659;660
594	SH10TC	RPMI001	stomach	carcinoma		137;350;383;459;464;514;539;569;601;604;615;624;631;638;647;651;657;660
595	SNU216	RPMI001	stomach	carcinoma		163;338;421;489;562;590;593;615;624;631;638;647;651;657;660
596	SNU601	RPMI001	stomach	carcinoma		135;233;281;331;395;464;514;539;569;601;604;615;624;631;638;647;651;657;660
597	SNU668	RPMI001	stomach	carcinoma	signet_ring_adenocarcinoma	62;119;422;500;537;550;572;602;608;627;636;646;651;657;660
598	SNU719	RPMI001	stomach	carcinoma		159;306;434;476;528;560;586;605;611;629;643;645;654;659;660
599	8305C	DMEM001	thyroid	carcinoma	anaplastic_carcinoma	21;149;204;381;465;520;586;605;611;629;643;645;654;659;660
600	8505C	EMEM001	thyroid	carcinoma	anaplastic_carcinoma	71;205;289;408;447;522;564;603;627;636;646;651;657;660
601	BCPAP	RPMI001	thyroid	carcinoma	papillary_carcinoma	149;204;381;465;520;586;605;611;629;643;645;654;659;660
602	BHT101	DMEM006	thyroid	carcinoma	anaplastic_carcinoma	114;322;426;523;574;591;598;616;630;643;645;654;659;660
603	CAL62	DMEM001	thyroid	carcinoma	anaplastic_carcinoma	273;371;515;632;641;654;659;660
604	CGTHW1	RPMI001	thyroid	carcinoma	follicular_carcinoma	373;409;566;589;607;628;638;647;651;657;660
605	FTC133	DMEMF12001	thyroid	carcinoma	follicular_carcinoma	307;390;474;570;599;634;646;651;657;660
606	FTC238	DMEMF12003	thyroid	carcinoma	follicular_carcinoma	13;61;117;246;331;395;464;514;539;569;601;604;615;624;631;638;647;651;657;660
607	ML1	DMEM006	thyroid	carcinoma	follicular_carcinoma	229;362;542;567;600;609;624;631;638;647;651;657;660
608	SW579	DMEM001	thyroid	carcinoma	anaplastic_carcinoma	9;35;79;263;373;409;566;589;607;628;638;647;651;657;660
609	TT	RPMI001	thyroid	carcinoma	medullary_carcinoma	209;367;472;507;540;574;591;598;616;630;643;645;654;659;660
610	TT2609C02	RPMI003	thyroid	carcinoma	follicular_carcinoma	215;285;395;464;514;539;569;601;604;615;624;631;638;647;651;657;660
611	BHY	DMEM001	upper_aerodigestive_tract	carcinoma	squamous_cell_carcinoma	76;194;290;304;388;507;540;574;591;598;616;630;643;645;654;659;660
612	BICR16	DMEM013	upper_aerodigestive_tract	carcinoma	squamous_cell_carcinoma	146;301;424;502;556;569;601;604;615;624;631;638;647;651;657;660
613	BICR18	DMEM013	upper_aerodigestive_tract	carcinoma	squamous_cell_carcinoma	195;285;395;464;514;539;569;601;604;615;624;631;638;647;651;657;660
614	BICR22	DMEM013	upper_aerodigestive_tract	carcinoma	squamous_cell_carcinoma	31;52;101;161;197;208;219;369;444;514;539;569;601;604;615;624;631;638;647;651;657;660
615	BICR31	DMEM013	upper_aerodigestive_tract	carcinoma	squamous_cell_carcinoma	27;121;243;389;420;477;530;545;584;595;609;624;631;638;647;651;657;660
616	BICR56	DMEM013	upper_aerodigestive_tract	carcinoma	squamous_cell_carcinoma	356;510;527;588;623;631;638;647;651;657;660
617	BICR6	DMEM005	upper_aerodigestive_tract	carcinoma	squamous_cell_carcinoma	47;161;197;208;219;369;444;514;539;569;601;604;615;624;631;638;647;651;657;660
618	CAL27	DMEM001	upper_aerodigestive_tract	carcinoma	squamous_cell_carcinoma	39;291;326;501;530;545;584;595;609;624;631;638;647;651;657;660
619	CAL33	DMEM005	upper_aerodigestive_tract	carcinoma	squamous_cell_carcinoma	78;124;219;369;444;514;539;569;601;604;615;624;631;638;647;651;657;660
620	DETROIT562	EMEM001	upper_aerodigestive_tract	carcinoma		162;228;358;445;521;550;572;602;608;627;636;646;651;657;660
621	FADU	EMEM001	upper_aerodigestive_tract	carcinoma	squamous_cell_carcinoma	152;346;468;587;599;634;646;651;657;660
622	HSC2	EMEM001	upper_aerodigestive_tract	carcinoma	squamous_cell_carcinoma	129;196;326;501;530;545;584;595;609;624;631;638;647;651;657;660
623	HSC3	EMEM001	upper_aerodigestive_tract	carcinoma	squamous_cell_carcinoma	162;228;358;445;521;550;572;602;608;627;636;646;651;657;660
624	HSC4	EMEM001	upper_aerodigestive_tract	carcinoma	squamous_cell_carcinoma	152;346;468;587;599;634;646;651;657;660
625	PECAPJ15	IMDM005	upper_aerodigestive_tract	carcinoma	squamous_cell_carcinoma	178;280;527;588;623;631;638;647;651;657;660
626	PECAPJ34CLONEC12	IMDM005	upper_aerodigestive_tract	carcinoma	squamous_cell_carcinoma	1;4;17;31;52;101;161;197;208;219;369;444;514;539;569;601;604;615;624;631;638;647;651;657;660
627	PECAPJ41CLONED2	IMDM005	upper_aerodigestive_tract	carcinoma	squamous_cell_carcinoma	1;4;17;31;52;101;161;197;208;219;369;444;514;539;569;601;604;615;624;631;638;647;651;657;660
628	PECAPJ49	IMDM002	upper_aerodigestive_tract	carcinoma	squamous_cell_carcinoma	4;17;31;52;101;161;197;208;219;369;444;514;539;569;601;604;615;624;631;638;647;651;657;660
629	SCC25	DMEMF12005	upper_aerodigestive_tract	carcinoma	squamous_cell_carcinoma	241;399;503;551;565;601;604;615;624;631;638;647;651;657;660
630	SCC4	DMEMF12003	upper_aerodigestive_tract	carcinoma	squamous_cell_carcinoma	298;356;510;527;588;623;631;638;647;651;657;660
631	SCC9	DMEMF12005	upper_aerodigestive_tract	carcinoma	squamous_cell_carcinoma	27;121;243;389;420;477;530;545;584;595;609;624;631;638;647;651;657;660
632	SNU1041	RPMI001	upper_aerodigestive_tract	carcinoma		222;365;445;521;550;572;602;608;627;636;646;651;657;660
633	SNU1066	RPMI001	upper_aerodigestive_tract	carcinoma	squamous_cell_carcinoma	385;533;604;615;624;631;638;647;651;657;660
634	SNU1076	RPMI001	upper_aerodigestive_tract	carcinoma	squamous_cell_carcinoma	76;194;290;304;388;507;540;574;591;598;616;630;643;645;654;659;660
635	SNU1214	RPMI001	upper_aerodigestive_tract	carcinoma	squamous_cell_carcinoma	182;304;388;507;540;574;591;598;616;630;643;645;654;659;660
636	SNU46	RPMI001	upper_aerodigestive_tract	carcinoma	squamous_cell_carcinoma	422;500;537;550;572;602;608;627;636;646;651;657;660
637	SNU899	RPMI001	upper_aerodigestive_tract	carcinoma	squamous_cell_carcinoma	62;119;422;500;537;550;572;602;608;627;636;646;651;657;660
638	YD10B	RPMI001	upper_aerodigestive_tract	carcinoma	squamous_cell_carcinoma	182;304;388;507;540;574;591;598;616;630;643;645;654;659;660
639	YD38	RPMI001	upper_aerodigestive_tract	carcinoma	squamous_cell_carcinoma	29;82;194;290;304;388;507;540;574;591;598;616;630;643;645;654;659;660
640	YD8	RPMI001	upper_aerodigestive_tract	carcinoma	squamous_cell_carcinoma	212;372;467;517;576;594;602;608;627;636;646;651;657;660
641	253J	DMEM001	urinary_tract	carcinoma	transitional_cell_carcinoma	308;374;484;520;586;605;611;629;643;645;654;659;660
642	253JBV	DMEM001	urinary_tract	carcinoma	transitional_cell_carcinoma	273;371;515;632;641;654;659;660
643	5637	RPMI001	urinary_tract	carcinoma		131;189;274;400;454;538;559;591;598;616;630;643;645;654;659;660
644	639V	DMEM001	urinary_tract	carcinoma	transitional_cell_carcinoma	271;384;432;484;520;586;605;611;629;643;645;654;659;660
645	647V	DMEM011	urinary_tract	carcinoma	transitional_cell_carcinoma	13;61;117;246;331;395;464;514;539;569;601;604;615;624;631;638;647;651;657;660
646	BC3C	MCCOYS5A001	urinary_tract	carcinoma	transitional_cell_carcinoma	167;230;369;444;514;539;569;601;604;615;624;631;638;647;651;657;660
647	BFTC905	DMEM001	urinary_tract	carcinoma	transitional_cell_carcinoma	543;597;619;629;643;645;654;659;660
648	CAL29	DMEM001	urinary_tract	carcinoma	transitional_cell_carcinoma	325;472;507;540;574;591;598;616;630;643;645;654;659;660
649	HT1197	EMEM003	urinary_tract	carcinoma		438;524;593;615;624;631;638;647;651;657;660
650	HT1376	EMEM003	urinary_tract	carcinoma	transitional_cell_carcinoma	509;561;594;602;608;627;636;646;651;657;660
651	J82	EMEM001	urinary_tract	carcinoma	transitional_cell_carcinoma	262;506;570;599;634;646;651;657;660
652	JMSU1	RPMI001	urinary_tract	carcinoma		99;203;260;374;484;520;586;605;611;629;643;645;654;659;660
653	KMBC2	HAMSF12002	urinary_tract	carcinoma		298;356;510;527;588;623;631;638;647;651;657;660
654	KU1919	RPMI001	urinary_tract	carcinoma	transitional_cell_carcinoma	226;470;555;575;605;611;629;643;645;654;659;660
655	RT112	RPMI001	urinary_tract	carcinoma	transitional_cell_carcinoma	126;258;414;502;556;569;601;604;615;624;631;638;647;651;657;660
656	RT4	MCCOYS5A001	urinary_tract	carcinoma	transitional_cell_carcinoma	193;335;419;462;504;511;600;609;624;631;638;647;651;657;660
657	SCABER	EMEM003	urinary_tract	carcinoma	transitional_cell_carcinoma	39;291;326;501;530;545;584;595;609;624;631;638;647;651;657;660
658	SW1710	DMEM011	urinary_tract	carcinoma	transitional_cell_carcinoma	639;648;656;661;662
659	T24	MCCOYS5A001	urinary_tract	carcinoma	transitional_cell_carcinoma	83;184;218;349;411;459;464;514;539;569;601;604;615;624;631;638;647;651;657;660
660	TCCSUP	EMEM001	urinary_tract	carcinoma	transitional_cell_carcinoma	244;340;417;521;550;572;602;608;627;636;646;651;657;660
661	UBLC1	DMEM005	urinary_tract	carcinoma	transitional_cell_carcinoma	163;338;421;489;562;590;593;615;624;631;638;647;651;657;660
662	UMUC1	MEM003	urinary_tract	carcinoma	transitional_cell_carcinoma	458;494;545;584;595;609;624;631;638;647;651;657;660
663	UMUC3	EMEM001	urinary_tract	carcinoma	transitional_cell_carcinoma	92;296;379;480;556;569;601;604;615;624;631;638;647;651;657;660
664	VMCUB1	RPMI001	urinary_tract	carcinoma	transitional_cell_carcinoma	28;82;194;290;304;388;507;540;574;591;598;616;630;643;645;654;659;660

## Sheet: S3
index_cpd	index_ccl	area_under_sensitivity_curve
1	1	11.025
1	2	9.356
1	3	10.734
1	4	11.337
1	5	14.064
1	6	8.4827
1	7	11.181
1	8	12.016
1	10	12.843
1	11	10.799
1	12	13.261
1	13	10.503
1	14	11.808
1	16	14.494
1	17	10.865
1	18	12.444
1	19	12.77
1	20	10.866
1	21	13.632
1	22	10.01
1	24	13.827
1	25	13.039
1	26	12.23
1	27	13.567
1	28	12.898
1	29	11.487
1	30	12.639
1	31	9.344
1	32	10.617
1	33	12.93
1	34	10.352
1	35	10.131
1	36	11.912
1	37	11.247
1	39	13.531
1	40	13.072
1	41	13.656
1	42	14.653
1	43	11.309
1	44	12.028
1	45	12.118
1	46	13.135
1	47	13.171
1	48	12.708
1	49	11.497
1	50	13.152
1	51	14.149
1	52	11.963
1	53	12.687
1	54	11.057
1	55	14.462
1	56	11.072
1	57	14.014
1	58	13.131
1	59	13.078
1	60	11.635
1	61	12.078
1	62	11.802
1	63	14.809
1	64	12.973
1	65	11.11
1	66	13.386
1	67	12.868
1	68	13.147
1	69	11.315
1	70	10.713
1	71	11.676
1	72	11.06
1	73	13.571
1	74	13.488
1	75	12.852
1	76	12.225
1	77	13.326
1	78	12.048
1	79	9.9648
1	80	12.949
1	81	12.546
1	82	15
1	83	10.57
1	84	10.014
1	85	13.331
1	86	13.639
1	87	12.052
1	88	12.106
1	89	12.782
1	90	13.673
1	91	12.951
1	92	12.273
1	93	12.837
1	94	14.557
1	95	13.164
1	96	10.706
1	97	11.968
1	98	12.494
1	99	13.068
1	100	13.452
1	101	14.997
1	102	11.631
1	103	11.957
1	104	10.394
1	105	13.065
1	106	9.7024
1	107	13.026
1	108	12.078
1	109	14.241
1	110	14.317
1	111	14.578
1	112	14.26
1	113	13.08
1	114	12.52
1	115	14.117
1	116	12.949
1	117	12.492
1	118	13.157
1	119	12.591
1	120	13.65
1	121	12.952
1	122	13.604
1	123	11.931
1	124	13.618
1	125	12.102
1	126	13.353
1	127	12.441
1	128	12.392
1	129	11.296
1	130	12.404
1	131	13.441
1	132	11.688
1	133	9.9112
1	134	11.999
1	135	12.631
1	136	12.669
1	137	11.463
1	138	11.694
1	139	10.784
1	140	13.231
1	141	13.207
1	142	13.55
1	143	12.609
1	144	12.828
1	145	10.501
1	146	12.614
1	147	12.217
1	148	14.032
1	149	7.6067
1	150	9.4875
1	151	12.099
1	152	9.9064
1	153	9.892
1	154	9.0641
1	155	9.7948
1	156	9.1933
1	157	9.3079
1	158	9.6095
1	159	9.2209
1	160	10.083
1	161	11.263
1	162	12.168
1	163	12.345
1	164	16.013
1	165	11.7
1	166	12.936
1	167	14.007
1	168	13.804
1	169	13.083
1	170	13.166
1	171	14.217
1	172	12.873
1	173	7.9648
1	174	13.12
1	175	13.956
1	176	12.894
1	177	13.188
1	178	13.457
1	179	11.794
1	180	12.781
1	181	12.711
1	182	12.683
1	183	11.134
1	184	12.851
1	186	12.509
1	187	11.8
1	188	13.591
1	189	11.246
1	190	13.341
1	191	14.011
1	192	14.256
1	193	12.531
1	194	12.373
1	195	9.9523
1	196	14.661
1	197	12.798
1	198	12.417
1	199	11.841
1	200	13.091
1	201	12.252
1	202	11.234
1	203	14.478
1	204	10.897
1	205	12.78
1	206	12.444
1	207	11.165
1	208	12.846
1	209	14.156
1	210	11.522
1	211	11.87
1	212	8.3497
1	213	11.796
1	214	13.483
1	215	11.773
1	216	13.567
1	217	11.026
1	218	9.0726
1	219	12.013
1	220	12.345
1	221	11.791
1	223	13.576
1	224	12.632
1	225	10.975
1	226	10.631
1	227	11.792
1	228	14.352
1	229	13.403
1	230	11.058
1	231	13.41
1	232	13.628
1	233	12.415
1	234	13.642
1	235	12.263
1	236	12.679
1	237	13.564
1	238	12.277
1	239	11.461
1	240	14.771
1	241	11.178
1	242	12.591
1	243	13.604
1	244	12.824
1	245	14.143
1	246	10.494
1	247	12.888
1	248	13.576
1	249	13.962
1	250	11.938
1	252	11.688
1	253	12.996
1	254	16.434
1	255	13.84
1	256	14.24
1	257	13.081
1	258	12.863
1	259	12.851
1	260	11.87
1	261	10.73
1	262	13.489
1	263	12.732
1	264	11.779
1	265	12.151
1	266	11.108
1	267	11.034
1	268	10.812
1	269	12.293
1	270	12.88
1	271	11.261
1	272	10.613
1	273	14.083
1	274	11.926
1	275	10.603
1	276	12.228
1	277	11.898
1	278	12.49
1	279	12.442
1	280	10.966
1	281	13.942
1	283	11.265
1	284	12.274
1	285	10.595
1	286	12.901
1	287	11.982
1	288	12.048
1	289	11.271
1	290	13.155
1	291	16.79
1	292	13.174
1	293	14.074
1	294	12.31
1	295	12.649
1	296	12.123
1	297	12.307
1	298	11.701
1	299	13.491
1	300	12.58
1	301	11.028
1	302	9.4176
1	303	12.012
1	304	14.12
1	305	13.101
1	306	9.938
1	307	11.581
1	308	12.721
1	309	13.65
1	310	12.941
1	311	14.037
1	312	11.329
1	313	12.633
1	314	10.588
1	315	13.816
1	316	12.632
1	317	12.92
1	318	10.985
1	319	12.351
1	320	10.413
1	321	11.899
1	322	12.282
1	323	12.138
1	324	12.482
1	325	13.384
1	326	12.449
1	327	14.127
1	328	12.825
1	329	12.106
1	330	13.366
1	332	11.575
1	333	13.041
1	334	12.752
1	335	12.762
1	336	12.609
1	337	11.785
1	338	10.154
1	339	9.5569
1	340	12.598
1	341	11.594
1	342	13.03
1	343	13.434
1	344	12.161
1	345	13.525
1	346	12.061
1	347	12.811
1	348	11.292
1	349	14.121
1	350	10.438
1	351	12.823
1	352	12.194
1	353	14.192
1	354	12.962
1	355	12.758
1	356	12.158
1	357	13.427
1	358	10.192
1	359	13.004
1	360	11.806
1	361	11.936
1	362	12.245
1	363	12.7
1	364	12.897
1	365	10.44
1	366	11.993
1	367	12.842
1	368	11.276
1	369	12.003
1	370	11.551
1	371	11.401
1	372	15.803
1	373	14.067
1	374	9.5323
1	375	12.433
1	376	9.1322
1	377	12.738
1	378	11.863
1	379	13.022
1	380	12.327
1	381	10.446
1	382	14.198
1	383	12.329
1	384	12.986
1	385	13.27
1	386	13.221
1	387	11.611
1	388	10.486
1	389	13.084
1	390	11.982
1	391	14.226
1	392	12.363
1	393	14.254
1	394	12.599
1	395	13.763
1	396	12.558
1	397	12.69
1	398	12.965
1	399	11.994
1	400	11.714
1	401	11.028
1	402	11.703
1	403	11.621
1	404	12.148
1	405	11.764
1	406	11.87
1	407	12.061
1	408	10.22
1	409	12.222
1	410	12.764
1	411	12.226
1	412	10.789
1	413	11.701
1	414	13.114
1	415	13.779
1	416	13.578
1	417	12.342
1	418	14.81
1	419	12.693
1	420	13.147
1	421	13.223
1	422	13.332
1	423	13.446
1	424	13.785
1	425	12.104
1	426	13.205
1	427	12.389
1	428	10.046
1	429	11.506
1	430	13.941
1	431	12.745
1	432	12.442
1	433	13.168
1	434	12.569
1	435	11.574
1	436	13.8
1	437	12.087
1	438	12.092
1	439	13.969
1	440	14.162
1	441	12.451
1	442	13.163
1	443	11.837
1	444	13.146
1	445	13.462
1	446	11.76
1	447	13.24
1	448	11.287
1	449	13.185
1	450	11.178
1	451	13.2
1	452	11.004
1	453	13.176
1	454	12.598
1	455	13.52
1	456	12.567
1	457	12.888
1	458	13.095
1	459	12.159
1	460	12.464
1	461	12.012
1	462	14.08
1	463	15
1	464	11.235
1	465	12.207
1	466	12.568
1	467	14.694
1	468	12.59
1	469	13.701
1	470	13.692
1	471	12.847
1	472	17.618
1	474	13.948
1	475	11.672
1	476	13.338
1	477	13.947
1	478	14.064
1	479	12.567
1	480	12.666
1	481	13.771
1	482	13.823
1	483	14.548
1	484	12.453
1	485	14.668
1	486	13.666
1	487	13.702
1	488	12.895
1	489	11.699
1	490	11.655
1	491	12.693
1	492	13.739
1	493	12.541
1	494	11.257
1	495	12.286
1	496	13.407
1	497	8.3905
1	498	11.044
1	499	12.868
1	500	12.531
1	501	13.281
1	502	12.759
1	503	12.844
1	504	10.584
1	505	14.385
1	506	13.004
1	507	12.175
1	508	13.522
1	509	12.074
1	510	13.606
1	511	10.726
1	512	12.458
1	513	12.519
1	514	13.639
1	515	13.561
1	516	11.495
1	517	12.785
1	518	12.301
1	519	12.098
1	520	14.436
1	521	12.919
1	522	14.082
1	523	12.421
1	524	13.673
1	525	13.474
1	526	11.395
1	527	13.681
1	528	12.868
1	529	11.051
1	530	13.839
1	531	13.584
1	532	13.7
1	533	12.332
1	534	14.15
1	535	13.007
1	536	11.903
1	537	12.8
1	538	11.75
1	539	10.666
1	540	11.701
1	541	15.501
1	542	13.858
1	543	13.824
1	544	13.366
1	545	13.564
1	546	14.31
1	547	11.838
1	548	13.285
1	549	14.036
1	550	12.617
1	551	12.694
1	552	12.043
1	553	13.377
1	554	12.898
1	555	12.929
1	556	11.295
1	557	11.794
1	558	12.316
1	559	11.782
1	560	12.248
1	561	12.687
1	562	11.286
1	563	12.65
1	564	11.931
1	565	12.689
1	566	11.997
1	568	12.435
1	570	12.569
1	571	12.09
1	572	13.437
1	573	11.277
1	574	11.758
1	576	13.326
1	577	9.5232
1	578	9.4678
1	579	10.814
1	580	9.1175
1	581	13.879
1	582	11.535
1	583	12.54
1	584	11.677
1	585	13.244
1	586	13.312
1	587	12.871
1	588	15.293
1	589	14.055
1	590	12.234
1	591	11.413
1	592	12.306
1	593	14.072
1	594	13.515
1	595	11.579
1	596	11.463
1	597	14.056
1	598	14.425
1	599	10.984
1	600	12.747
1	601	10.15
1	602	13.246
1	604	11.712
1	605	14.094
1	606	12.18
1	607	13.602
1	608	11.981
1	609	12.189
1	610	13.495
1	611	13.646
1	612	13.312
1	613	13.069
1	614	12.521
1	615	13.382
1	616	12.72
1	617	12.52
1	618	12.016
1	619	10.659
1	620	11.286
1	621	13.089
1	622	11.426
1	623	11.715
1	624	11.557
1	625	13.391
1	626	12.46
1	627	12.234
1	628	11.881
1	629	12.878
1	630	11.042
1	631	13.535
1	632	13.68
1	633	13.394
1	634	10.942
1	635	11.389
1	636	13.767
1	637	14.241
1	638	10.215
1	639	11.777
1	640	12.287
1	641	11.161
1	642	7.711
1	643	9.8575
1	644	14.446
1	645	12.62
1	646	12.297
1	648	12.56
1	649	13.264
1	650	12.532
1	651	12.537
1	652	9.9272
1	653	12.088
1	654	11.892
1	655	12.066
1	656	11.92
1	657	12.238
1	658	7.7821
1	659	12.602
1	660	13.4
1	661	11.622
1	662	12.447
1	663	11.284
1	664	11.912
2	1	14.078
2	2	16.169
2	3	15
2	4	13.828
2	5	14.636
2	7	14.248
2	8	15.093
2	10	14.704
2	11	12.719
2	12	14.471
2	13	13.843
2	14	14.884
2	15	14.068
2	16	15.954
2	17	15
2	18	13.545
2	19	14.571
2	20	14.48
2	21	14.036
2	22	14.899
2	24	15.701
2	25	15.29
2	26	14.982
2	27	13.326
2	28	14.504
2	29	14.795
2	30	14.405
2	31	14.346
2	32	14.311
2	33	14.929
2	34	14.846
2	35	14.634
2	36	16.173
2	37	12.781
2	38	13.926
2	39	14.808
2	40	14.973
2	41	14.504
2	42	15.501
2	43	14.324
2	44	12.85
2	45	13.85
2	46	15
2	47	14.81
2	48	14.299
2	49	16.073
2	50	15
2	51	14.726
2	52	15.018
2	53	16.821
2	54	14.176
2	55	15.396
2	56	14.752
2	57	12.931
2	58	15.93
2	59	14.721
2	60	13.367
2	61	14.443
2	62	13.897
2	63	15.497
2	64	15.71
2	65	11.171
2	66	12.721
2	67	16.733
2	68	14.887
2	69	13.742
2	70	14.408
2	71	13.608
2	72	15.466
2	73	14.563
2	74	14.114
2	75	14.446
2	76	11.009
2	77	14.662
2	78	14.034
2	79	13.52
2	80	15.093
2	81	14.6
2	82	14.999
2	83	11.777
2	84	13.968
2	85	15
2	86	14.677
2	87	14.559
2	88	14.269
2	89	14.66
2	90	14.575
2	91	14.771
2	92	14.686
2	93	15.777
2	94	11.834
2	95	14.379
2	96	14.504
2	97	15
2	98	13.846
2	99	14.857
2	100	14.853
2	101	13.731
2	102	13.688
2	103	14.742
2	104	13.623
2	105	14.582
2	106	14.552
2	107	14.686
2	108	16.442
2	109	16.035
2	110	14.718
2	111	14.755
2	112	15.017
2	113	14.562
2	114	16.193
2	115	14.013
2	116	14.161
2	117	14.788
2	118	14.921
2	119	14.925
2	120	14.212
2	121	14.238
2	122	15
2	123	11.586
2	124	14.885
2	125	16.013
2	126	14.75
2	127	14.106
2	128	14.586
2	129	13.726
2	130	14.858
2	131	14.503
2	132	14.139
2	133	13.062
2	134	13.064
2	135	14.81
2	136	14.254
2	137	13.444
2	138	14.932
2	139	13.765
2	140	14.413
2	141	14.7
2	143	14.617
2	144	15
2	145	12.879
2	146	13.372
2	147	15.14
2	148	14.651
2	149	12.334
2	150	13.293
2	151	14.614
2	152	13.461
2	153	13.768
2	154	14.17
2	156	12.953
2	157	12.212
2	158	12.754
2	159	11.701
2	160	12.892
2	161	15.853
2	162	13.477
2	163	13.009
2	165	14.901
2	166	14.964
2	167	14.654
2	168	14.952
2	169	14.611
2	170	14.159
2	171	14.741
2	172	13.584
2	174	14.738
2	175	14.558
2	176	15.291
2	177	14.701
2	178	13.176
2	179	13.942
2	180	14.078
2	181	13.513
2	182	14.335
2	183	13.772
2	184	14.864
2	186	15.086
2	187	14.299
2	188	13.963
2	189	12.966
2	190	15.307
2	191	14.544
2	192	13.288
2	193	14.685
2	194	15.856
2	195	13.577
2	196	13.392
2	197	13.664
2	198	12.678
2	199	14.291
2	200	15.825
2	201	15.914
2	202	13.953
2	203	15.355
2	204	14.346
2	205	15.322
2	206	14.101
2	207	14.626
2	208	14.264
2	209	14.917
2	210	13.813
2	211	14.64
2	213	14.507
2	214	15.699
2	215	14.109
2	216	14.885
2	217	14.356
2	219	14.577
2	220	13.393
2	221	15.903
2	223	15.893
2	225	13.431
2	226	14.851
2	227	13.773
2	228	14.634
2	229	13.763
2	230	13.752
2	231	15.322
2	232	13.424
2	233	13.848
2	234	14.633
2	235	15.864
2	236	14.841
2	237	15.356
2	238	14.957
2	239	13.632
2	240	15.169
2	241	14.449
2	242	14.893
2	243	14.719
2	244	14.87
2	245	14.289
2	246	13.845
2	247	13.88
2	248	13.795
2	249	14.56
2	250	16.976
2	251	13.9
2	253	13.312
2	254	15.881
2	255	13.015
2	256	14.625
2	257	14.538
2	258	14.053
2	259	13.412
2	260	14.481
2	261	16.296
2	262	14.655
2	263	15.643
2	264	13.79
2	265	12.703
2	266	13.901
2	267	14.639
2	268	13.411
2	269	15
2	270	13.492
2	271	16.631
2	272	13.061
2	273	14.471
2	274	13.162
2	275	13.544
2	276	13.971
2	277	14.86
2	278	14.917
2	279	13.219
2	280	17.203
2	281	14.374
2	283	14.27
2	284	14.764
2	285	13.696
2	286	14.525
2	287	13.367
2	288	15.349
2	289	14.288
2	290	14.326
2	292	14.981
2	293	13.318
2	294	15.238
2	295	13.49
2	296	13.384
2	297	14.777
2	298	12.524
2	299	14.677
2	300	14.865
2	301	14.763
2	302	14.466
2	303	16.196
2	304	14.978
2	305	14.867
2	306	12.263
2	307	13.389
2	308	13.282
2	309	14.656
2	310	15.497
2	311	14.32
2	312	13.093
2	313	13.741
2	314	13.902
2	315	14.54
2	316	15.501
2	317	12
2	318	14.789
2	319	14.534
2	320	14.134
2	321	15.768
2	322	17.587
2	323	13.605
2	324	13.266
2	325	14.703
2	326	14.176
2	327	14.756
2	328	15.291
2	329	14.525
2	330	15.25
2	332	13.915
2	333	14.371
2	334	15.641
2	335	14.58
2	336	14.906
2	337	15
2	338	14.516
2	339	16.034
2	340	13.533
2	341	12.659
2	342	14.582
2	343	14.139
2	344	15
2	345	16.279
2	346	16.563
2	347	14.942
2	348	13.829
2	349	14.511
2	350	14.052
2	351	14.085
2	352	15.494
2	353	15.64
2	354	16.079
2	355	14.698
2	356	12.37
2	357	13.225
2	358	13.149
2	359	14.581
2	360	13.288
2	361	15.088
2	362	12.742
2	363	13.126
2	364	13.426
2	365	14.32
2	366	13.705
2	367	15
2	368	12.912
2	369	13.12
2	370	13.245
2	371	14.56
2	372	15
2	373	14.623
2	374	14.764
2	375	14.768
2	376	13.585
2	377	14.863
2	378	14.165
2	379	12.618
2	380	17.868
2	381	13.734
2	382	14.681
2	383	14.91
2	384	14.975
2	385	13.35
2	386	14.897
2	387	12.632
2	388	14.997
2	389	14.124
2	390	14.757
2	391	14.777
2	392	13.079
2	393	14.706
2	394	14.74
2	395	14.366
2	396	14.326
2	397	14.718
2	398	14.385
2	399	15.933
2	400	12.132
2	401	15.522
2	402	14.898
2	403	16.853
2	404	14.948
2	405	16.941
2	406	17.939
2	407	15.2
2	408	12.564
2	409	14.213
2	410	12.822
2	411	14.201
2	412	13.567
2	413	14.593
2	414	14.51
2	415	14.477
2	416	15
2	417	14.763
2	418	16.915
2	419	13.828
2	420	12.333
2	421	12.184
2	422	16.027
2	423	14.348
2	424	15.229
2	425	12.041
2	426	14.358
2	427	15.344
2	428	14.987
2	429	13.808
2	430	14.92
2	431	13.829
2	432	15
2	433	14.631
2	434	14.758
2	435	14.154
2	436	14.046
2	437	16.048
2	438	14.883
2	439	13.732
2	440	14.649
2	441	14.611
2	442	16.149
2	443	16.34
2	444	16.718
2	445	13.823
2	446	11.427
2	447	15
2	448	13.867
2	449	14.855
2	450	13.495
2	451	13.944
2	452	16.206
2	453	14.762
2	454	15.42
2	455	13.63
2	456	14.867
2	457	13.171
2	458	15.004
2	459	14.011
2	460	13.352
2	461	15.601
2	462	14.714
2	463	14.369
2	464	14.29
2	465	14.559
2	466	13.197
2	467	14.847
2	468	14.847
2	469	14.682
2	470	16.206
2	471	15.272
2	473	13.657
2	474	13.645
2	475	14.879
2	476	15.444
2	477	14.721
2	478	13.84
2	479	16.481
2	480	12.491
2	481	14.253
2	482	14.081
2	483	16.467
2	484	16.892
2	485	13.423
2	486	14.791
2	487	15.446
2	488	14.243
2	489	14.98
2	490	14.62
2	491	13.765
2	492	14.801
2	493	16.143
2	494	13.283
2	495	14.838
2	496	15.697
2	497	14.751
2	498	13.11
2	499	14.525
2	500	14.187
2	501	14.773
2	502	14.953
2	503	14.907
2	504	14.133
2	505	14.942
2	506	14.903
2	507	14.882
2	508	14.829
2	509	13.457
2	510	14.633
2	511	14.3
2	512	13.261
2	513	14.726
2	514	15.372
2	515	13.983
2	516	13.586
2	517	14.6
2	518	14.539
2	519	15.813
2	520	16.124
2	521	11.341
2	522	14.97
2	524	13.972
2	525	13.965
2	526	14.076
2	527	15.587
2	528	14.07
2	529	15.635
2	530	7.488
2	531	14.8
2	532	14.778
2	533	13.305
2	534	17.17
2	535	14.817
2	536	15.834
2	537	15.187
2	538	14.997
2	539	13.462
2	540	12.59
2	541	15.434
2	542	14.829
2	543	14.264
2	544	15.083
2	545	15.397
2	546	14.38
2	547	14.958
2	548	14.708
2	549	14.797
2	550	14.791
2	551	15.323
2	552	15
2	553	14.597
2	554	14.441
2	555	13.955
2	556	14.674
2	557	14.703
2	558	14.571
2	559	14.237
2	560	14.754
2	561	14.328
2	562	14.092
2	563	13.609
2	564	13.761
2	565	14.316
2	566	15.613
2	567	13.668
2	568	14.466
2	570	14.783
2	571	13.45
2	572	14.98
2	573	14.502
2	574	14.224
2	575	13.029
2	576	14.808
2	577	13.847
2	578	14.48
2	579	15.891
2	580	11.495
2	581	14.912
2	582	12.081
2	583	14.012
2	584	14.396
2	585	14.574
2	586	14.587
2	587	15
2	588	14.205
2	589	14.96
2	590	13.065
2	591	15
2	592	14.544
2	594	14.84
2	595	12.687
2	596	14.759
2	597	15
2	598	13.745
2	599	13.777
2	600	14.443
2	601	14.424
2	602	13.44
2	603	14.026
2	604	13.182
2	605	14.835
2	606	14.916
2	607	14.147
2	608	13.897
2	609	15.071
2	610	15.274
2	611	14.417
2	612	16.273
2	613	14.64
2	614	14.042
2	615	14.356
2	616	14.815
2	617	14.777
2	618	13.864
2	619	15.593
2	620	14.772
2	621	15.187
2	622	14.473
2	623	14.633
2	624	14.218
2	625	14.31
2	626	14.721
2	627	14.371
2	628	14.95
2	629	15.223
2	630	14.435
2	631	14.984
2	632	14.558
2	633	14.87
2	634	13.552
2	635	14.196
2	636	15.923
2	637	15
2	638	13.899
2	639	14.568
2	640	16.93
2	641	14.303
2	642	13.919
2	643	13.275
2	644	13.772
2	645	14.561
2	646	14.466
2	647	14.764
2	648	13.229
2	649	14.104
2	650	11.648
2	651	14.017
2	652	11.953
2	653	13.943
2	654	13.307
2	655	14.802
2	656	15.782
2	657	14.719
2	659	14.726
2	660	14.985
2	661	15.912
2	662	14.836
2	663	13.636
2	664	14.357
3	2	14.657
3	3	15.026
3	4	15.072
3	5	14.401
3	6	13.755
3	7	14.716
3	8	14.599
3	11	14.02
3	12	14.841
3	13	9.9557
3	14	15.717
3	16	14.72
3	17	15
3	18	14.897
3	19	14.71
3	20	15.254
3	21	13.89
3	22	14.992
3	24	15.608
3	25	14.962
3	26	14.361
3	27	15
3	28	15
3	29	12.095
3	30	15.934
3	31	14.664
3	32	16.139
3	34	14.669
3	35	14.993
3	36	16.155
3	37	14.142
3	38	15
3	39	16.239
3	40	18.653
3	41	17.941
3	42	15.734
3	43	17.453
3	44	15.627
3	45	14.948
3	46	15.369
3	47	16.275
3	48	14.116
3	49	15
3	50	15.078
3	51	15
3	52	14.941
3	53	15.005
3	54	14.996
3	55	15.517
3	56	15.125
3	60	14.736
3	61	14.33
3	62	14.852
3	63	14.319
3	64	16.729
3	65	15.659
3	66	15.963
3	67	14.964
3	68	17.12
3	70	14.718
3	71	14.466
3	73	15
3	74	13.288
3	75	14.921
3	76	16.168
3	77	14.712
3	78	14.504
3	79	15
3	80	14.45
3	81	13.713
3	83	14.887
3	84	14.359
3	85	15.045
3	86	17.689
3	87	15
3	88	15.185
3	89	15
3	90	15.858
3	91	14.784
3	92	14.618
3	93	14.499
3	94	15.802
3	98	14.982
3	99	15.182
3	100	14.855
3	101	14.791
3	102	14.875
3	103	14.98
3	104	17.446
3	105	14.188
3	106	15.336
3	108	14.974
3	109	15
3	110	14.629
3	111	14.96
3	112	14.431
3	113	15.829
3	114	15
3	115	14.94
3	116	14.839
3	117	15.609
3	118	14.678
3	119	16.388
3	120	14.725
3	121	15.059
3	123	11.771
3	124	14.989
3	125	17.613
3	126	14.213
3	127	14.707
3	128	14.953
3	129	15.374
3	130	16.817
3	131	15
3	132	15.334
3	133	14.994
3	134	14.601
3	135	14.94
3	136	15.659
3	137	15.227
3	138	14.459
3	139	15.037
3	140	17.083
3	141	17.763
3	142	14.002
3	143	16.757
3	144	14.332
3	145	15.656
3	146	15.282
3	147	15
3	148	16.249
3	150	14.11
3	151	14.85
3	152	14.585
3	153	13.742
3	154	14.071
3	156	14.426
3	157	14.007
3	158	13.537
3	159	14.97
3	160	14.645
3	161	14.191
3	162	14.893
3	163	14.61
3	164	18.654
3	165	14.741
3	167	14.655
3	168	14.937
3	170	14.939
3	171	14.818
3	172	14.53
3	173	15.255
3	174	15.318
3	175	15.806
3	176	14.441
3	177	15.548
3	178	17.355
3	180	15.736
3	181	15.186
3	182	15.079
3	183	16.228
3	184	15
3	186	15.022
3	187	14.827
3	188	14.741
3	189	16.028
3	190	14.591
3	191	15.659
3	192	14.726
3	193	14.224
3	194	14.359
3	195	15.369
3	196	14.888
3	197	15.501
3	198	15.085
3	199	15.59
3	200	15.807
3	201	14.481
3	202	14.93
3	203	15.462
3	204	15.191
3	205	15.42
3	206	15.341
3	207	17.873
3	208	14.733
3	209	16.221
3	210	14.796
3	211	16.12
3	212	14.718
3	213	15
3	214	15.216
3	215	15.265
3	216	14.913
3	217	16.084
3	219	14.725
3	220	14.609
3	221	17.799
3	223	15.726
3	225	14.867
3	226	14.738
3	227	15.193
3	228	17.042
3	229	15.862
3	230	16.178
3	231	15.712
3	232	9.84
3	233	16.551
3	234	16.284
3	235	14.989
3	236	14.365
3	237	15.012
3	238	14.772
3	239	14.238
3	240	15.101
3	241	14.926
3	242	14.026
3	243	14.595
3	244	15
3	245	14.514
3	246	14.509
3	247	15.417
3	248	14.325
3	251	15.686
3	253	16.084
3	254	15.301
3	255	15.367
3	256	16.702
3	257	15.167
3	258	15.271
3	259	14.707
3	260	16.301
3	261	14.929
3	262	14.956
3	263	14.855
3	264	14.894
3	265	14.107
3	266	14.499
3	268	18.294
3	269	16.301
3	271	15.946
3	272	14.843
3	273	15.494
3	275	16.977
3	276	14.868
3	277	14.778
3	278	14.39
3	279	14.7
3	280	14.831
3	281	20.104
3	283	15.298
3	284	14.823
3	285	14.963
3	286	16.673
3	287	14.916
3	288	15.906
3	289	16.1
3	292	15.419
3	293	16.881
3	294	14.537
3	295	14.338
3	296	13.6
3	297	14.822
3	298	14.596
3	299	15.59
3	300	15
3	301	15.06
3	302	15.596
3	303	14.517
3	304	15
3	305	15.336
3	306	15.952
3	307	14.82
3	308	15.647
3	309	17.987
3	310	17.299
3	311	15.614
3	312	13.861
3	314	15.304
3	315	18.622
3	317	14.761
3	318	15.516
3	320	14.357
3	321	14.966
3	322	15.689
3	323	15
3	324	15.513
3	325	14.685
3	326	14.999
3	327	16.642
3	328	14.935
3	329	15.494
3	330	16.131
3	331	16.331
3	332	15
3	333	13.736
3	335	14.907
3	336	14.915
3	337	15.262
3	338	15.237
3	339	15.279
3	340	15.394
3	341	14.898
3	342	14.042
3	343	15.73
3	344	14.963
3	345	14.876
3	348	15.55
3	349	14.359
3	350	14.083
3	351	14.565
3	352	15.631
3	354	15
3	355	15.24
3	356	15.271
3	357	15.416
3	359	15.001
3	360	14.613
3	361	16.483
3	362	15.408
3	363	14.79
3	364	15.662
3	365	14.473
3	366	15.578
3	367	15.749
3	368	15.636
3	369	14.998
3	370	14.303
3	372	14.819
3	373	16.018
3	374	14.643
3	375	14.12
3	376	14.714
3	377	15.422
3	378	14.405
3	379	16.532
3	381	11.777
3	382	18.684
3	383	15.528
3	384	16.072
3	385	16.612
3	386	14.656
3	387	15.512
3	388	14.818
3	389	14.615
3	390	14.786
3	391	14.669
3	392	14.998
3	393	18.486
3	394	13.462
3	395	13.892
3	396	17.082
3	397	15.698
3	398	15
3	399	15.426
3	400	14.001
3	401	14.999
3	402	14.848
3	404	14.943
3	407	15.506
3	408	14.73
3	409	15.173
3	410	11.858
3	411	14.275
3	412	14.991
3	413	12.382
3	414	14.558
3	415	17.364
3	416	15.656
3	417	14.941
3	418	16.292
3	419	14.891
3	420	15.408
3	421	14.939
3	422	16.918
3	423	14.179
3	424	16.113
3	425	15.15
3	426	16.239
3	427	15.295
3	428	14.967
3	429	15
3	430	15.464
3	431	14.168
3	432	14.917
3	433	16.922
3	434	15.831
3	435	15.263
3	436	14.985
3	437	15.355
3	438	15.727
3	439	15.464
3	440	15
3	441	14.982
3	442	15
3	443	15.193
3	444	16.124
3	445	15.424
3	446	14.503
3	447	15
3	448	14.217
3	449	18.394
3	450	15
3	451	16.193
3	452	14.664
3	454	17.332
3	455	15
3	456	12.316
3	457	11.352
3	458	14.422
3	459	14.786
3	460	14.252
3	461	15.641
3	462	15.291
3	463	15.867
3	464	15.396
3	465	15.465
3	466	15.714
3	467	15.101
3	468	14.862
3	469	14.533
3	470	14.845
3	471	16.198
3	472	16.321
3	473	14.181
3	474	14.747
3	475	15
3	476	14.729
3	477	14.867
3	478	17.912
3	479	15.825
3	480	14.448
3	481	14.996
3	482	15.802
3	485	17.293
3	486	14.853
3	487	14.478
3	489	15.669
3	490	15
3	491	14.969
3	492	12.747
3	494	14.224
3	495	15.237
3	497	14.983
3	498	14.503
3	499	14.484
3	500	15.294
3	501	15.73
3	502	14.691
3	503	14.15
3	504	15.263
3	505	14.658
3	506	15.509
3	507	16.858
3	508	14.762
3	509	14.943
3	510	14.1
3	511	15
3	512	16.132
3	513	13.945
3	514	15.527
3	515	13.707
3	516	15.197
3	517	15.201
3	518	14.918
3	519	14.995
3	520	14.981
3	521	14.3
3	522	15.693
3	524	13.429
3	526	15
3	527	14.95
3	528	12.871
3	529	14.187
3	530	15.479
3	531	14.82
3	532	13.239
3	533	16.054
3	535	16.182
3	536	14.706
3	537	14.932
3	538	14.515
3	540	12.908
3	541	14.16
3	543	16.227
3	544	16.088
3	545	14.487
3	546	15.521
3	547	15
3	548	14.812
3	549	14.893
3	550	15.139
3	551	14.798
3	552	14.574
3	553	15
3	554	14.765
3	555	13.368
3	556	15.314
3	557	14.962
3	558	14.924
3	559	15.495
3	560	13.937
3	561	14.806
3	563	14.942
3	564	14.463
3	565	14.87
3	566	14.885
3	567	14.272
3	568	15.538
3	570	15.188
3	571	14.305
3	572	15.343
3	573	14.967
3	574	15.866
3	575	14.309
3	576	14.669
3	578	15.763
3	579	15.529
3	580	14.369
3	581	14.075
3	582	13.843
3	583	14.68
3	584	14.747
3	585	14.815
3	586	14.894
3	587	14.349
3	588	14.216
3	589	16.796
3	590	15
3	591	14.693
3	592	13.914
3	594	14.574
3	595	15
3	596	15
3	597	15.479
3	598	14.817
3	599	15.067
3	600	14.895
3	601	14.729
3	602	14.899
3	603	14.916
3	604	14.948
3	605	15.252
3	606	14.327
3	608	14.939
3	609	14.902
3	610	14.211
3	611	15.124
3	612	15
3	613	14.773
3	614	15.274
3	615	14.987
3	616	15.006
3	617	14.28
3	618	15
3	619	14.875
3	620	15.682
3	621	14.841
3	622	14.928
3	623	14.921
3	624	15.178
3	625	16.145
3	626	14.485
3	627	15.486
3	628	14.447
3	629	15.67
3	630	15.261
3	631	14.36
3	632	15.612
3	633	15
3	634	13.739
3	635	14.809
3	636	13.414
3	637	15.591
3	638	15.542
3	639	15.775
3	641	14.362
3	642	16.145
3	643	14.335
3	644	14.876
3	645	15.442
3	646	14.763
3	649	15
3	650	14.688
3	651	14.636
3	652	15
3	653	15.216
3	654	15.671
3	655	15.339
3	656	15.145
3	657	16.006
3	658	15
3	659	14.298
3	660	15
3	661	15.819
3	662	14.094
3	663	15.223
3	664	14.572
4	1	12.213
4	2	14.183
4	3	13.376
4	4	14.866
4	5	15.054
4	7	14.544
4	8	13.936
4	10	11.2
4	11	11.063
4	12	11.622
4	13	15
4	14	14.058
4	15	12.364
4	17	13.382
4	18	13.698
4	19	13.683
4	21	11.209
4	22	10.906
4	24	13.881
4	25	12.126
4	26	13.287
4	27	14.65
4	28	11.833
4	30	12.79
4	31	13.565
4	32	11.196
4	33	12.111
4	34	10.282
4	35	14.545
4	36	11.415
4	37	11.572
4	38	9.8118
4	39	12.775
4	40	11.442
4	41	12.848
4	42	13
4	43	14.131
4	45	11.18
4	46	14.331
4	48	13.84
4	49	11.824
4	51	14.647
4	52	13.031
4	54	14.063
4	55	14.18
4	56	12.19
4	57	13.787
4	58	15.279
4	59	14.848
4	60	14.78
4	61	13.823
4	62	14.44
4	63	12.383
4	64	14.38
4	65	11.256
4	66	14.907
4	67	14.291
4	68	11.867
4	70	11.183
4	71	13.958
4	72	10.667
4	73	11.902
4	74	14.839
4	76	11.291
4	77	14.798
4	78	14.107
4	79	13.936
4	80	14.641
4	81	11.516
4	82	15
4	83	14.32
4	84	13.743
4	85	14.71
4	86	15.652
4	87	11.979
4	88	14.445
4	89	13.147
4	90	15.363
4	91	14.62
4	92	11.145
4	93	13.976
4	94	11.443
4	96	12.438
4	97	15.544
4	98	14.819
4	99	10.799
4	100	14.202
4	102	14.685
4	103	13.874
4	104	11.559
4	105	14.449
4	106	11.343
4	107	11.543
4	108	14.655
4	109	16.843
4	111	14.252
4	112	14.038
4	113	13.638
4	114	12.003
4	115	14.211
4	116	14.38
4	117	15.592
4	118	14.394
4	119	12.138
4	120	14.714
4	121	14.647
4	122	12.277
4	123	14.15
4	124	15.595
4	125	12.509
[truncated: 258,497+ more rows]

## Sheet: S4
gene_name_of_protein_target	index_cpd
ABL1	150;411;450;457
AHR	222;470
AKT1	113;333;356
ALK	267;395
APH1A	144;158;343;435
ATM	167;171;220
AURKA	157;309;384
AURKB	309;332;384
BCL2	130;146;183;300;324;415;481
BCL2L1	130;146;183;294;300;415
BCL2L2	300;415
BCR	411;457
BRAF	105;133;134;164;241;301;353;462
BRD2	94;221
BRD3	94;221
BRD4	94;221
CASP3	196;460
CDK1	122;341;359;371
CDK2	122;240;341;359
CDK4	341;359
CDK5	122;341;371
CDK7	240;341
CDK9	122;197;240;341
DNMT1	2;78;402;444
DRD2	147;446
EGFR	151;176;269;333;345;365;375;392;413;426
EHMT2	178;374;380;431
EIF4A2	109;162
EIF4E	109;162
EIF4G1	109;162
ERBB2	151;269;345;365;426
ESR1	53;466
EZH2	237;276;326
F2R	138;465
FAAH	93;228;416
FGFR1	184;260
FGFR2	184;260
FGFR3	184;260
FLT1	185;193;232;238;260;284;299;382;432;480
FLT3	157;164;193;232;238;260;273;284;299;382;442;467;480
FNTA	328;330;397
GPER1	52;53
GSK3B	132;410
HDAC1	59;70;80;110;141;168;246;279;336;348;393;404;407;425
HDAC2	59;70;80;110;141;246;279;336;348;393;404;407
HDAC3	59;70;141;189;246;256;279;336;393;407
HDAC6	59;62;70;141;246;272;279;296;336;361;393;407
HDAC8	59;70;141;246;272;279;336;393;407;441
HMGCR	34;44;159
HSP90AA1	304;368;409
HSPA1A	200;472
HSPA1B	200;472
HSPA1L	200;472
IDH1	7;45
IGF1R	97;120;127;212
IKBKB	111;121;274
INSR	97;212
JAK1	288;344;436
JAK2	68;116;288;344;436
KDR	79;134;164;172;185;193;232;238;254;260;273;284;299;382;392;432;462;480
KIT	134;172;193;232;238;254;263;367;382;411;442;457
MAP2K1	36;115;302
MAP2K2	36;115;302
MAPK1	98;477
MAPK14	378;419
MCL1	1;130;215;303
MDM2	11;61;139;314;461
MEN1	335;451
MET	76;79;149;204;273;299;395
MGMT	181;452
MTOR	90;95;114;352;355;362;385;423;433
NAMPT	160;255;305;417
NCSTN	144;158;343;435
NR1D1	5;399
PARP1	69;434
PARP2	69;434
PDGFRA	193;232;238;254;260;367
PDGFRB	193;232;238;260;367;382
PIK3CA	90;114;282;292;295;355;385
PIK3CB	30;90;114;261;282;295;306;329;355;385
PIK3CD	90;114;282;306;317;329;340;355;385;386
PIK3CG	90;114;190;282;329;340;355;385
PKM	245;405
PLD2	198;321
PLK1	295;327;342;448;455
PRKDC	101;355;385
PSEN1	144;158;343;435
PSENEN	144;158;343;435
PSMB1	315;439
PSMB2	315;439
PSMB5	315;398;439
PSMD1	315;439
PSMD2	315;439
RAF1	164;241
RARA	92;252;338;370
RARB	89;252;338;370;463
RARG	83;173;187;252;338;370
RET	134;273
RRM1	119;126
SIRT1	41;286;391
SIRT2	41;201
SPHK1	156;403
SRC	150;194;263;450
STAT3	219;233
TERT	81;153
TGFBR1	225;351;394
TOP1	28;298
TOP2A	25;227;453
TP53	61;128;166;264;461;472
TYMS	126;170
UGCG	88;98
USP13	381;424
USP14	243;251
USP5	243;381
XIAP	75;143
XPO1	180;322;369

## Sheet: S5
cell_line_feature	index_ccl
adenocarcinoma	124;128;129;130;131;132;133;134;135;136;137;138;139;140;141;142;143;144;146;182;183;184;185;186;187;188;190;191;193;194;196;197;198;199;200;201;202;203;204;205;206;207;208;209;210;211;219;220;221;222;223;224;225;226;227;228;229;230;243;257;262;268;278;279;280;284;285;286;287;300;301;307;308;309;311;313;315;317;319;320;321;322;324;332;333;336;337;338;341;342;346;349;351;352;355;357;372;373;377;383…
alveolar	565;566;567
anaplastic_carcinoma	599;600;602;603;608
astrocytoma	82;91;103;117;118;119;120
astrocytoma_Grade_IV	76;77;78;79;80;81;85;86;88;90;94;96;97;98;99;100;105;108;109;110;111;112;116;121;122
autonomic_ganglia	1;2;3;4;5;6;7;8;9;10;11;12;13;14
biliary_tract	15;16;17;18;19;20;21
blast_phase	150;157;160
bone	22;23;24;25;26;27;28;29;30;31;32;33;34;35;36;37
breast	38;39;40;41;42;43;44;45;46;47;48;49;50;51;52;53;54;55;56;57;58;59;60;61;62;63;64;65;66;67;68;69;70;71;72;73;74;75
bronchioloalveolar_adenocarcinoma	316;318;323;356;364
carcinosarcoma	127;147;148
central_nervous_system	76;77;78;79;80;81;82;83;84;85;86;87;88;89;90;91;92;93;94;95;96;97;98;99;100;101;102;103;105;108;109;110;111;112;113;114;115;116;117;118;119;120;121;122
chondrosarcoma	24;27;36
chronic_myeloid_leukaemia	150;157;160
clear_cell_carcinoma	417;421;436;439;441;442;449
clear_cell_renal_cell_carcinoma	162;163;167;168;170;171;173;176
diffuse_adenocarcinoma	579;588;593
ductal_carcinoma	39;40;41;43;48;49;50;52;54;55;56;57;58;59;61;62;63;65;66;73;74;75;451;452;453;454;455;457;458;459;463;464;466;468;471;472;473;474;475;476;480;484;485;486
endometrium	124;125;126;127;128;129;130;131;132;133;134;135;136;137;138;139;140;141;142;143;144;145;146;147;148
Ewings_sarcoma_peripheral_primitive_neuroectodermal_tumor	22;23;28;31;34;35
female	10;12;14;22;23;25;26;28;32;35;36;37;38;39;40;41;42;43;44;45;46;47;48;49;50;51;52;53;54;55;56;57;58;59;60;61;62;63;64;65;66;67;68;69;70;71;72;73;74;75;77;82;85;86;87;93;99;102;120;122;124;125;126;127;128;129;130;131;132;133;134;135;136;137;138;139;141;142;143;144;145;146;147;148;150;153;155;157;158;160;162;164;176;185;196;201;202;212;214;219;221;223;224;225;226;229;240;245;251;258;260;265;277;280;…
follicular_carcinoma	604;605;606;607;610
glioma	76;77;78;79;80;81;82;85;86;87;88;89;90;91;92;93;94;95;96;97;98;99;100;101;103;105;108;109;110;111;112;113;114;115;116;117;118;119;120;121;122
haematopoietic_and_lymphoid_tissue	149;150;151;152;153;154;155;156;157;158;159;160;161
haematopoietic_neoplasm	150;152;157;160
hepatocellular_carcinoma	231;232;233;234;236;237;238;239;240;241;242;244;245;246;247;248;249;250;251;252
kidney	162;163;164;165;166;167;168;169;170;171;172;173;174;175;176;177;178;179;180;181
large_cell_carcinoma	275;291;294;295;298;302;314;328;359;365;368;382
large_intestine	182;183;184;185;186;187;188;189;190;191;192;193;194;195;196;197;198;199;200;201;202;203;204;205;206;207;208;209;210;211;212;213;214;215;216;217;218;219;220;221;222;223;224;225;226;227;228;229;230
liver	231;232;233;234;235;236;237;238;239;240;241;242;243;244;245;246;247;248;249;250;251;252
lung	253;254;255;256;257;258;259;260;262;263;264;265;266;267;268;269;271;272;273;274;275;276;277;278;279;280;281;282;283;284;285;286;287;288;291;292;293;294;295;296;297;298;299;300;301;302;303;304;305;306;307;308;309;310;311;312;313;314;315;316;317;318;319;320;321;322;323;324;325;326;327;328;329;330;331;332;333;334;335;336;337;338;339;340;341;342;343;344;345;346;347;348;349;350;351;352;353;354;355;356…
lymphoid_neoplasm	149;151;153;154;155;156;158;159;161
male	2;4;6;7;9;11;13;15;24;27;29;30;31;33;34;76;78;79;80;81;83;84;88;89;90;91;92;94;95;96;97;98;100;108;109;110;111;112;113;114;115;116;118;119;121;149;152;154;156;159;161;163;165;166;167;168;169;170;171;180;182;186;187;188;190;192;193;194;199;200;203;204;206;207;211;213;215;216;217;218;220;222;227;228;230;231;232;233;234;236;237;238;239;242;243;244;246;247;248;249;250;252;253;254;255;256;257;259;262;…
malignant_melanoma	505;506;507;508;509;510;511;512;513;514;515;516;517;518;519;520;521;522;523;524;525;526;527;528;529;530;531;532;533;534;535;536;537;538;539;540;541;542;543;544;545;546;547;548;549;550;551;552;553;554;555
malignant_mesodermal_mixed_tumor	127;147;148
mesothelioma	489;490;491;492;493;494;495;496;497
mixed_adenosquamous_carcinoma	145;274;283;362;363;587
mucoepidermoid_carcinoma	354;503;504
neuroblastoma	1;2;3;4;5;6;7;8;9;10;11;12;13;14
non_small_cell_carcinoma	253;255;273;281;304;310;312;325;326;329;331;335;340;344;350;353;361;369;371;375
oesophagus	384;385;386;387;388;389;390;391;392;393;394;395;396;397;398;399;400;401;402;403;404;405;406;407
osteosarcoma	25;26;29;30;32;33;37
ovary	408;409;410;411;412;413;415;416;417;418;419;420;421;422;423;424;425;426;427;428;429;430;431;432;433;435;436;437;438;439;440;441;442;443;444;445;446;447;448;449;450
pancreas	451;452;453;454;455;456;457;458;459;460;461;462;463;464;465;466;467;468;469;470;471;472;473;474;475;476;477;478;479;480;481;482;483;484;485;486;487;488
plasma_cell_myeloma	158;159;161
pleura	489;490;491;492;493;494;495;496;497
primitive_neuroectodermal_tumor_medulloblastoma	83;84;102
prostate	498;499;500;501;502
renal_cell_carcinoma	164;165;169;172;174;175;181
rhabdoid_tumor	556;557;558
rhabdomyosarcoma	560;562;564;565;566;567;572;573;574
sarcoma	563;569;570
serous_carcinoma	415;418;428
skin	505;506;507;508;509;510;511;512;513;514;515;516;517;518;519;520;521;522;523;524;525;526;527;528;529;530;531;532;533;534;535;536;537;538;539;540;541;542;543;544;545;546;547;548;549;550;551;552;553;554;555
small_cell_carcinoma	260;263;264;265;266;267;282;303;305;306;330;334;339;345;348;358;366;370;376;380
soft_tissue	556;557;558;559;560;561;562;563;564;565;566;567;568;569;570;571;572;573;574
squamous_cell_carcinoma	256;269;271;272;276;277;288;292;293;296;297;299;327;343;347;360;374;378;379;381;384;386;387;388;389;390;391;392;393;394;396;398;399;400;401;402;403;404;405;406;407;611;612;613;614;615;616;617;618;619;621;622;623;624;625;626;627;628;629;630;631;633;634;635;636;637;638;639;640
stomach	575;576;577;578;579;580;581;582;583;584;585;586;587;588;589;590;591;592;593;594;595;596;597;598
thyroid	599;600;601;602;603;604;605;606;607;608;609;610
transitional_cell_carcinoma	641;642;644;645;646;647;648;650;651;654;655;656;657;658;659;660;661;662;663;664
undifferentiated_carcinoma	258;424;450
upper_aerodigestive_tract	611;612;613;614;615;616;617;618;619;620;621;622;623;624;625;626;627;628;629;630;631;632;633;634;635;636;637;638;639;640
urinary_tract	641;642;643;644;645;646;647;648;649;650;651;652;653;654;655;656;657;658;659;660;661;662;663;664

## Sheet: S6
mutation_call	hugo_gene_symbol	cell_line_feature	index_ccl
CCLE Hybrid Capture Mutations	AAK1	AAK1_p._ANY_CODING_MUTATION	2;3;4;6;7;8;10;12;13;15;16;18;19;20;22;23;24;28;29;30;31;33;35;36;37;38;39;40;42;43;44;45;46;47;48;50;51;56;57;60;63;64;69;70;72;79;86;87;89;93;95;101;102;108;109;113;116;117;120;121;124;126;127;128;129;130;131;132;133;134;135;136;137;138;141;142;143;145;146;147;148;150;151;152;156;157;158;161;166;168;170;171;173;174;175;176;180;182;185;189;191;193;195;198;201;202;205;206;207;208;210;213;218;219;…
CCLE Hybrid Capture Mutations	AAK1	AAK1_p.Q541	2;3;4;6;7;8;10;12;13;15;16;18;19;20;22;23;24;28;29;30;31;33;35;36;37;38;39;40;42;43;44;45;46;47;48;50;51;56;57;60;63;64;69;70;72;79;86;87;89;93;95;101;102;108;109;113;116;117;120;121;124;126;127;129;130;131;132;133;134;135;136;137;138;141;142;143;145;146;147;148;151;152;156;157;158;161;166;168;170;171;173;174;175;176;180;182;185;189;191;193;195;198;201;202;205;206;207;208;210;213;218;219;220;221;…
CCLE Hybrid Capture Mutations	AAK1	AAK1_p.Q541indel2>Q	2;3;4;6;7;8;10;12;13;15;16;18;19;20;22;23;24;28;29;30;31;33;35;36;37;38;39;40;42;43;44;45;46;47;48;50;51;56;57;60;63;64;69;70;72;79;86;87;89;93;95;101;102;108;109;113;116;117;120;121;124;126;127;129;130;131;132;133;134;135;136;137;138;141;142;143;145;146;147;148;151;152;156;157;158;161;166;168;170;171;173;174;175;176;180;182;185;189;191;193;195;198;201;202;205;206;207;208;210;213;218;219;220;221;…
CCLE Hybrid Capture Mutations	AATK	AATK_p._ANY_CODING_MUTATION	38;60;72;114;126;145;149;157;183;207;213;226;269;303;312;366;368;386;395;410;432;440;500;568;571;572;631
CCLE Hybrid Capture Mutations	ABCA3	ABCA3_p._ANY_CODING_MUTATION	8;52;67;113;126;127;128;130;131;132;133;135;136;137;145;157;162;171;183;185;193;195;197;198;205;209;210;213;244;249;305;319;333;343;351;358;361;430;483;500;501;543;556;589;595;637;644;653
CCLE Hybrid Capture Mutations	ABCA3	ABCA3_p.L654	113;171;209;244
CCLE Hybrid Capture Mutations	ABCA3	ABCA3_p.L654V	113;171;209;244
CCLE Hybrid Capture Mutations	ABCA3	ABCA3_p.N124	127;343;556
CCLE Hybrid Capture Mutations	ABCA3	ABCA3_p.N124S	127;343;556
CCLE Hybrid Capture Mutations	ABCC3	ABCC3_p._ANY_CODING_MUTATION	17;27;128;131;133;135;157;168;182;193;198;202;213;214;218;241;274;295;313;314;340;377;392;449;477;478;526;533;535;538;650;656;661
CCLE Hybrid Capture Mutations	ABCC4	ABCC4_p._ANY_CODING_MUTATION	4;13;103;126;128;132;135;138;145;182;183;198;213;219;255;256;285;310;315;329;373;423;426;429;482;495;498;499;504;527;606;610;634;640
CCLE Hybrid Capture Mutations	ABCC4	ABCC4_p.S629	504;634;640
CCLE Hybrid Capture Mutations	ABCC4	ABCC4_p.S629Y	504;634;640
CCLE Hybrid Capture Mutations	ABI1	ABI1_p._ANY_CODING_MUTATION	31;56;89;132;135;141;150;203;215;219;220;230;445;499;500;589;613;654;663
CCLE Hybrid Capture Mutations	ABL1	ABL1_p._ANY_CODING_MUTATION	61;96;113;128;133;135;151;157;213;328;340;390;420;454;459;503;513;581;584;618;623;644;652
CCLE Hybrid Capture Mutations	ABL2	ABL2_p._ANY_CODING_MUTATION	5;49;53;126;130;132;133;135;146;168;170;189;193;210;213;218;221;226;256;283;285;301;315;340;364;416;463;499;500;519;538;551;606;638;654
CCLE Hybrid Capture Mutations	ACACA	ACACA_p._ANY_CODING_MUTATION	2;38;72;86;90;128;133;135;136;143;144;162;183;189;192;193;199;203;210;213;214;218;256;264;308;326;342;350;351;366;380;416;420;477;499;503;549;551;571;583;644;650;664
CCLE Hybrid Capture Mutations	ACACB	ACACB_p._ANY_CODING_MUTATION	28;30;50;56;68;70;98;128;130;131;132;133;135;138;141;144;145;155;166;172;183;189;193;196;198;202;205;213;218;219;221;241;249;252;265;268;269;280;304;305;310;315;326;332;343;349;350;378;387;392;416;420;435;439;440;473;478;491;498;531;538;572;575;579;584;592;598;605;619;655;662
CCLE Hybrid Capture Mutations	ACACB	ACACB_p.T1396	135;420;584
CCLE Hybrid Capture Mutations	ACACB	ACACB_p.T1396fs	135;420;584
CCLE Hybrid Capture Mutations	ACACB	ACACB_p.V999	241;478;579
CCLE Hybrid Capture Mutations	ACACB	ACACB_p.V999I	241;478;579
CCLE Hybrid Capture Mutations	ACOXL	ACOXL_p._ANY_CODING_MUTATION	10;84;122;136;146;157;171;218;271;272;356;394;513;621;627
CCLE Hybrid Capture Mutations	ACOXL	ACOXL_p.V446	122;157;171;272;394
CCLE Hybrid Capture Mutations	ACOXL	ACOXL_p.V446M	122;157;171;272;394
CCLE Hybrid Capture Mutations	ACSL6	ACSL6_p._ANY_CODING_MUTATION	128;132;138;144;168;185;189;213;221;225;277;281;308;350;365;367;380;416;499;500;616
CCLE Hybrid Capture Mutations	ACVR1	ACVR1_p._ANY_CODING_MUTATION	73;127;128;132;136;183;189;215;285;325;349;420;499;644
CCLE Hybrid Capture Mutations	ACVR1B	ACVR1B_p._ANY_CODING_MUTATION	96;102;126;128;135;193;198;203;213;215;221;226;345;360;571
CCLE Hybrid Capture Mutations	ACVR1C	ACVR1C_p._ANY_CODING_MUTATION	91;126;128;145;209;218;579;613
CCLE Hybrid Capture Mutations	ACVR2A	ACVR2A_p._ANY_CODING_MUTATION	53;79;128;129;130;133;135;137;141;143;145;183;185;189;192;193;195;198;199;201;202;203;204;213;215;219;220;221;226;228;238;249;255;268;273;277;300;394;420;437;449;498;499;554;569;571;584;585;592;613
CCLE Hybrid Capture Mutations	ACVR2A	ACVR2A_p.K435	128;129;133;135;137;145;183;185;189;192;193;198;199;202;203;204;213;215;219;220;221;226;268;277;420;437;449;498;499;571;584;592
CCLE Hybrid Capture Mutations	ACVR2A	ACVR2A_p.K435fs	128;129;133;135;137;145;183;185;189;192;193;198;199;202;203;204;213;215;219;220;221;226;268;277;420;437;449;498;499;571;584;592
CCLE Hybrid Capture Mutations	ACVR2B	ACVR2B_p._ANY_CODING_MUTATION	4;40;136;141;145;189;193;199;255;313;328;358;403;538;575
CCLE Hybrid Capture Mutations	ACVRL1	ACVRL1_p._ANY_CODING_MUTATION	23;108;124;126;128;144;145;197;198;213;364;411;420;433;540;577
CCLE Hybrid Capture Mutations	ADAM10	ADAM10_p._ANY_CODING_MUTATION	128;137;141;166;189;195;205;221;243;249;341;367;381;429;512;650
CCLE Hybrid Capture Mutations	ADAM12	ADAM12_p._ANY_CODING_MUTATION	126;132;157;161;193;195;210;213;218;313;320;325;348;384;393;416;420;474;499;575;606;628
CCLE Hybrid Capture Mutations	ADAM17	ADAM17_p._ANY_CODING_MUTATION	18;128;132;135;136;158;189;219;226;292;340;350;435;592;610;619
CCLE Hybrid Capture Mutations	ADAM18	ADAM18_p._ANY_CODING_MUTATION	26;30;53;70;77;128;129;192;195;213;218;226;233;239;266;272;333;385;420;450;499;500;503;511;515;531;535;537;538;541;547;575;590;615
CCLE Hybrid Capture Mutations	ADAM22	ADAM22_p._ANY_CODING_MUTATION	45;98;124;126;135;144;151;183;184;185;189;191;195;203;210;213;227;305;315;326;344;383;405;430;451;538;559;577;594;613
CCLE Hybrid Capture Mutations	ADAM28	ADAM28_p._ANY_CODING_MUTATION	8;53;60;114;117;124;128;129;132;134;135;136;137;141;144;189;192;193;195;220;221;237;238;248;252;400;420;424;437;466;480;510;529;530;531;534;545;592;644
CCLE Hybrid Capture Mutations	ADAM28	ADAM28_p.F156	129;221;237;238;248
CCLE Hybrid Capture Mutations	ADAM28	ADAM28_p.F156L	129;221;237;238;248
CCLE Hybrid Capture Mutations	ADAM28	ADAM28_p.L72	128;129;136;137;144;189;192;193;420;437
CCLE Hybrid Capture Mutations	ADAM28	ADAM28_p.L72fs	128;129;136;137;144;189;192;193;420;437
CCLE Hybrid Capture Mutations	ADAM29	ADAM29_p._ANY_CODING_MUTATION	18;30;53;69;70;95;115;126;132;136;137;141;143;144;149;166;186;187;192;198;213;214;219;220;221;224;280;294;297;305;312;313;316;331;332;351;356;358;359;403;422;473;479;492;499;502;515;523;531;532;536;554;556;560;562;594;609;616;637;638;655
CCLE Hybrid Capture Mutations	ADAM29	ADAM29_p.L464	18;137;479
CCLE Hybrid Capture Mutations	ADAM29	ADAM29_p.L464F	18;137;479
CCLE Hybrid Capture Mutations	ADAM29	ADAM29_p.L691	30;69;115;186;187;192;224;294;297;305;316;358;473;492;502;532;536;556;560;609;616;655
CCLE Hybrid Capture Mutations	ADAM29	ADAM29_p.L691del	30;69;115;186;187;192;224;294;297;305;316;358;473;492;502;532;536;556;560;609;616;655
CCLE Hybrid Capture Mutations	ADAM29	ADAM29_p.L691del1	30;69;115;186;187;192;224;294;297;305;316;358;473;492;502;532;536;556;560;609;616;655
CCLE Hybrid Capture Mutations	ADAM32	ADAM32_p._ANY_CODING_MUTATION	46;58;128;143;146;195;210;215;218;219;220;221;226;227;254;287;313;332;351;420;531
CCLE Hybrid Capture Mutations	ADAM32	ADAM32_p.Q386	146;215;226
CCLE Hybrid Capture Mutations	ADAM32	ADAM32_p.Q386fs	146;215;226
CCLE Hybrid Capture Mutations	ADAMTS18	ADAMTS18_p._ANY_CODING_MUTATION	29;43;50;54;63;64;87;102;109;113;126;128;129;130;131;132;133;135;137;138;141;146;155;157;167;183;189;193;195;197;198;205;210;213;215;218;226;250;252;257;266;268;308;312;351;365;369;527;529;530;531;537;538;540;541;554;573;575;590;591;637;644
CCLE Hybrid Capture Mutations	ADAMTS18	ADAMTS18_p.F695	126;129;130;131;137;146;157;183;193;213;226;268
CCLE Hybrid Capture Mutations	ADAMTS18	ADAMTS18_p.F695fs	126;129;130;131;137;146;157;183;193;213;226;268
CCLE Hybrid Capture Mutations	ADAMTS18	ADAMTS18_p.R1047	189;531;637
CCLE Hybrid Capture Mutations	ADAMTS18	ADAMTS18_p.R1047Q	189;531;637
CCLE Hybrid Capture Mutations	ADAMTS18	ADAMTS18_p.S1187	54;529;530
CCLE Hybrid Capture Mutations	ADAMTS19	ADAMTS19_p._ANY_CODING_MUTATION	17;27;35;58;67;129;132;136;141;189;192;193;195;198;203;218;227;241;244;253;255;258;292;310;313;325;329;344;365;368;380;382;383;387;420;531;538;541;543;547;559;571;576;581;584;628;634;639;644
CCLE Hybrid Capture Mutations	ADAMTS2	ADAMTS2_p._ANY_CODING_MUTATION	102;126;128;132;135;137;138;146;167;185;189;193;202;203;213;226;227;259;276;287;288;316;317;326;344;348;364;382;401;453;474;477;523;537;555
CCLE Hybrid Capture Mutations	ADAMTS20	ADAMTS20_p._ANY_CODING_MUTATION	112;126;128;129;130;131;132;135;141;144;145;163;167;175;178;184;185;189;195;203;210;213;215;220;221;222;246;260;273;274;291;305;310;313;314;315;328;332;334;342;344;350;351;380;381;416;417;423;437;449;483;499;500;504;510;512;513;534;537;538;551;553;567;576;578;587;592;600;609;613;651
CCLE Hybrid Capture Mutations	ADAMTSL3	ADAMTSL3_p._ANY_CODING_MUTATION	7;21;38;45;49;68;109;126;128;132;133;135;141;193;203;204;210;213;215;218;232;255;267;276;277;293;305;310;313;321;325;338;342;348;349;356;368;369;390;442;449;482;498;538;551;554;559;567;585;598;622;641;642;653
CCLE Hybrid Capture Mutations	ADARB2	ADARB2_p._ANY_CODING_MUTATION	53;129;133;135;138;139;150;168;249;255;259;260;349;364;449;498;604
CCLE Hybrid Capture Mutations	ADCK1	ADCK1_p._ANY_CODING_MUTATION	44;125;135;138;218;228;239;247;287;295;297;308;318;340;368;382;388;389;391;441;462;478;480;538;542;558;579;611;613;641;642
CCLE Hybrid Capture Mutations	ADCK1	ADCK1_p.M210	135;388;391;462;480;579
CCLE Hybrid Capture Mutations	ADCK1	ADCK1_p.M210V	135;388;391;462;480;579
CCLE Hybrid Capture Mutations	ADCK2	ADCK2_p._ANY_CODING_MUTATION	114;115;128;221;272;449;477;542;593;636
CCLE Hybrid Capture Mutations	ADCK3	ADCK3_p._ANY_CODING_MUTATION	70;132;135;141;145;147;189;193;202;203;213;216;218;226;315;333;394;439;545;592;654
CCLE Hybrid Capture Mutations	ADCK4	ADCK4_p._ANY_CODING_MUTATION	128;136;189;213;218;226;344;571;601;622
CCLE Hybrid Capture Mutations	ADCK5	ADCK5_p._ANY_CODING_MUTATION	143;150;181;183;203;221;288;388;417;480
CCLE Hybrid Capture Mutations	ADHFE1	ADHFE1_p._ANY_CODING_MUTATION	129;132;144;202;203;210;342;348;597;598;654
CCLE Hybrid Capture Mutations	ADK	ADK_p._ANY_CODING_MUTATION	70;139;141;195;198;202;489;521;536
CCLE Hybrid Capture Mutations	ADRBK1	ADRBK1_p._ANY_CODING_MUTATION	91;96;128;135;144;145;157;200;213;219;268;286;340;351;664
CCLE Hybrid Capture Mutations	ADRBK2	ADRBK2_p._ANY_CODING_MUTATION	128;132;136;185;196;203;218;219;345;366;441;611;622;650
CCLE Hybrid Capture Mutations	AFF1	AFF1_p._ANY_CODING_MUTATION	38;120;132;134;146;183;203;218;263;268;296;310;325;356;357;362;378;383;437;449;499;532;558;576;600;605;641;642
CCLE Hybrid Capture Mutations	AFF3	AFF3_p._ANY_CODING_MUTATION	17;21;33;39;40;103;128;130;131;132;136;141;144;145;192;193;195;213;218;219;230;300;313;326;342;343;360;373;391;416;443;484;500;510;513;538;571;593;620;621;662
CCLE Hybrid Capture Mutations	AFF3	AFF3_p.R902	130;131;132
CCLE Hybrid Capture Mutations	AFF4	AFF4_p._ANY_CODING_MUTATION	16;43;114;129;132;137;138;157;183;185;186;187;189;192;199;210;213;218;238;240;297;317;325;372;375;432;538;604;608;613
CCLE Hybrid Capture Mutations	AFF4	AFF4_p.Q558	157;186;187
CCLE Hybrid Capture Mutations	AGAP2	AGAP2_p._ANY_CODING_MUTATION	30;68;115;126;132;138;141;144;150;157;171;193;195;210;213;218;300;312;364;369;383;387;393;403;406;420;538;539;575;589;592;613
CCLE Hybrid Capture Mutations	AGAP2	AGAP2_p.A10	138;171;589
CCLE Hybrid Capture Mutations	AGAP2	AGAP2_p.A10T	138;171;589
CCLE Hybrid Capture Mutations	AIFM1	AIFM1_p._ANY_CODING_MUTATION	43;57;138;141;143;146;189;213;215;256;336;420;506;513
CCLE Hybrid Capture Mutations	AIFM3	AIFM3_p._ANY_CODING_MUTATION	48;52;113;116;130;135;146;199;219;272;293;365;403;439;494;538;542;573
CCLE Hybrid Capture Mutations	AIM1	AIM1_p._ANY_CODING_MUTATION	48;103;126;128;129;133;139;141;189;199;205;208;210;213;249;253;280;330;348;367;371;392;397;420;437;468;508;512;538;562;567;621;637;655
CCLE Hybrid Capture Mutations	AKAP12	AKAP12_p.G269	340;350;395;409;531
CCLE Hybrid Capture Mutations	AKAP12	AKAP12_p.G269del	340;350;395;409;531
CCLE Hybrid Capture Mutations	AKAP12	AKAP12_p.G269del1	340;350;395;409;531
CCLE Hybrid Capture Mutations	AKAP4	AKAP4_p._ANY_CODING_MUTATION	42;99;124;126;132;133;141;189;192;208;239;310;334;356;389;439;507;538;547;567;584;627
CCLE Hybrid Capture Mutations	AKAP6	AKAP6_p._ANY_CODING_MUTATION	47;49;58;126;128;132;136;141;144;168;183;189;193;195;205;209;210;213;218;219;220;228;229;255;259;260;276;281;291;305;336;344;348;351;380;381;385;392;409;420;436;452;499;500;513;516;522;538;562;584;597;598;604;605;606;608
CCLE Hybrid Capture Mutations	AKAP6	AKAP6_p.R1876	522;605;606
CCLE Hybrid Capture Mutations	AKAP6	AKAP6_p.R1876C	522;605;606
CCLE Hybrid Capture Mutations	AKAP9	AKAP9_p._ANY_CODING_MUTATION	1;3;9;14;21;23;24;28;31;32;33;35;38;40;41;49;51;52;53;54;56;58;61;62;63;67;70;71;72;75;77;78;79;80;81;84;90;91;105;108;116;120;124;125;126;127;129;130;132;134;135;137;138;141;146;147;152;153;155;156;158;162;163;165;166;167;169;173;178;180;183;184;185;189;191;192;193;195;196;197;199;201;203;204;206;207;208;210;211;212;213;214;218;219;220;223;224;225;226;228;229;232;237;243;244;253;256;257;259;260;…
CCLE Hybrid Capture Mutations	AKAP9	AKAP9_p.M3743	135;213;226
CCLE Hybrid Capture Mutations	AKAP9	AKAP9_p.M3743fs	135;213;226
CCLE Hybrid Capture Mutations	AKAP9	AKAP9_p.X1335	1;3;14;21;23;24;28;31;32;33;35;38;40;41;51;52;53;54;56;58;61;62;63;67;70;71;72;75;77;78;79;80;81;84;90;91;105;108;116;120;124;125;126;127;137;138;147;152;153;155;156;162;165;166;167;173;178;183;184;185;192;193;196;199;203;204;206;207;208;210;212;214;219;223;224;225;228;229;232;237;243;244;253;256;257;259;260;264;268;271;273;274;275;276;277;278;282;284;293;299;300;304;306;308;311;312;314;318;320;3…
CCLE Hybrid Capture Mutations	AKAP9	AKAP9_p.X1335ins	1;3;14;21;23;24;28;31;32;33;35;38;40;41;51;52;53;54;56;58;61;62;63;67;70;71;72;75;77;78;79;80;81;84;90;91;105;108;116;120;124;125;126;127;137;138;147;152;153;155;156;162;165;166;167;173;178;183;184;185;192;193;196;199;203;204;206;207;208;210;212;214;219;223;224;225;228;229;232;237;243;244;253;256;257;259;260;264;268;271;273;274;275;276;277;278;282;284;293;299;300;304;306;308;311;312;314;318;320;3…
CCLE Hybrid Capture Mutations	AKAP9	AKAP9_p.X1335insQ	1;3;14;21;23;24;28;31;32;33;35;38;40;41;51;52;53;54;56;58;61;62;63;67;70;71;72;75;77;78;79;80;81;84;90;91;105;108;116;120;124;125;126;127;137;138;147;152;153;155;156;162;165;166;167;173;178;183;184;185;192;193;196;199;203;204;206;207;208;210;212;214;219;223;224;225;228;229;232;237;243;244;253;256;257;259;260;264;268;271;273;274;275;276;277;278;282;284;293;299;300;304;306;308;311;312;314;318;320;3…
CCLE Hybrid Capture Mutations	AKT1	AKT1_p._ANY_CODING_MUTATION	68;134;144;179;213;264;389;462;575;654
CCLE Hybrid Capture Mutations	AKT2	AKT2_p._ANY_CODING_MUTATION	135;137;189;199;226;260;333;334;383;512;551
CCLE Hybrid Capture Mutations	AKT3	AKT3_p._ANY_CODING_MUTATION	128;132;141;146;210;212;218;224;226;575;584
CCLE Hybrid Capture Mutations	ALDH7A1	ALDH7A1_p._ANY_CODING_MUTATION	114;130;131;133;135;141;218;221;313;407;436;480;633
CCLE Hybrid Capture Mutations	ALDH7A1	ALDH7A1_p.H339	130;131;141;436
CCLE Hybrid Capture Mutations	ALDH7A1	ALDH7A1_p.H339R	130;131;141;436
CCLE Hybrid Capture Mutations	ALK	ALK_p._ANY_CODING_MUTATION	3;19;69;79;96;132;135;164;171;173;189;204;205;213;216;218;220;221;226;268;286;308;310;317;319;338;364;391;393;404;416;430;441;450;462;463;465;482;516;532;541;545;554;571;605;626
CCLE Hybrid Capture Mutations	ALK	ALK_p.M1478	96;173;450;462;463
CCLE Hybrid Capture Mutations	ALK	ALK_p.M1478T	96;173;450;462;463
CCLE Hybrid Capture Mutations	ALPK1	ALPK1_p._ANY_CODING_MUTATION	8;19;57;101;128;141;143;166;192;193;210;213;219;228;264;388;406;437;439;444;446;499;526;531;533;538;560;585;636;637;643
CCLE Hybrid Capture Mutations	ALPK1	ALPK1_p.S942	8;166;388;439;446;636;637;643
CCLE Hybrid Capture Mutations	ALPK1	ALPK1_p.S942del	8;166;388;439;446;636;637;643
CCLE Hybrid Capture Mutations	ALPK1	ALPK1_p.S942del1	8;166;388;439;446;636;637;643
CCLE Hybrid Capture Mutations	ALPK1	ALPK1_p.T1150	101;437;585
CCLE Hybrid Capture Mutations	ALPK1	ALPK1_p.T1150fs	101;437;585
CCLE Hybrid Capture Mutations	ALPK2	ALPK2_p._ANY_CODING_MUTATION	1;2;3;4;9;10;12;20;26;27;28;30;31;34;35;37;39;40;41;43;44;45;46;47;49;50;51;53;56;57;58;60;61;63;64;67;70;73;74;76;77;78;80;81;84;86;90;91;92;95;98;100;102;105;112;113;115;117;120;121;122;124;125;127;132;135;136;138;141;142;144;149;151;152;153;156;158;161;163;164;166;169;170;172;174;180;181;182;184;185;189;193;195;196;197;198;200;201;202;203;207;208;209;210;211;212;213;216;218;226;228;230;233;240…
CCLE Hybrid Capture Mutations	ALPK2	ALPK2_p.E1006	1;3;4;10;12;20;26;28;30;31;34;35;37;40;41;44;45;46;47;49;50;51;56;57;58;60;61;63;64;67;73;74;76;77;80;81;84;90;95;102;105;112;113;117;120;136;142;158;161;166;170;172;174;181;184;185;195;196;197;198;201;202;203;209;211;212;216;226;228;230;233;240;244;245;247;249;256;257;269;271;275;276;283;284;299;300;301;306;307;311;312;313;315;316;317;319;320;323;325;326;327;328;330;331;332;333;334;338;339;341;3…
CCLE Hybrid Capture Mutations	ALPK2	ALPK2_p.E1006del	1;3;4;10;12;20;26;28;30;31;34;35;37;40;41;44;45;46;47;49;50;51;56;57;58;60;61;63;64;67;73;74;76;77;80;81;84;90;95;102;105;112;113;117;120;136;142;158;161;166;170;172;174;181;184;185;195;196;197;198;201;202;203;209;211;212;216;226;228;230;233;240;244;245;247;249;256;257;269;271;275;276;283;284;299;300;301;306;307;311;312;313;315;316;317;319;320;323;325;326;327;328;330;331;332;333;334;338;339;341;3…
CCLE Hybrid Capture Mutations	ALPK2	ALPK2_p.E1006del5	1;3;4;10;12;20;26;28;30;31;34;35;37;40;41;44;45;46;47;49;50;51;56;57;58;60;61;63;64;67;73;74;76;77;80;81;84;90;95;102;105;112;113;117;120;136;142;158;161;166;170;172;174;181;184;185;195;196;197;198;201;202;203;209;211;212;216;226;228;230;233;240;244;245;247;249;256;257;269;271;275;276;283;284;299;300;301;306;307;311;312;313;315;316;317;319;320;323;325;326;327;328;330;331;332;333;334;338;339;341;3…
CCLE Hybrid Capture Mutations	ALPK2	ALPK2_p.F1388	2;9;27;39;43;53;70;78;86;91;92;98;100;115;121;124;125;127;144;149;151;152;153;163;164;169;180;182;200;207;210;286;287;310;318;347;351;352;356;357;362;364;366;370;380;388;412;427;453;454;458;460;498;517;519;521;523;538;551;559;561;564;567;571;576;621;625;627;628;630;645;664
CCLE Hybrid Capture Mutations	ALPK2	ALPK2_p.F1388indel2>F	2;9;27;39;43;53;70;78;86;91;92;98;100;115;121;124;125;127;144;149;151;152;153;163;164;169;180;182;200;207;210;286;287;310;318;347;351;352;356;357;362;364;366;370;380;388;412;427;453;454;458;460;498;517;519;521;523;538;551;559;561;564;567;571;576;621;625;627;628;630;645;664
CCLE Hybrid Capture Mutations	ALPK2	ALPK2_p.K523	124;138;420;571
CCLE Hybrid Capture Mutations	ALPK2	ALPK2_p.K523fs	124;138;420;571
CCLE Hybrid Capture Mutations	ALPK3	ALPK3_p._ANY_CODING_MUTATION	13;21;26;68;100;103;124;126;128;129;132;135;137;138;146;180;193;254;276;287;321;362;389;461;502;529;530;541;583;636;663
CCLE Hybrid Capture Mutations	ALS2	ALS2_p._ANY_CODING_MUTATION	38;39;53;62;72;80;116;124;130;131;132;144;146;150;189;192;193;201;218;221;222;225;226;230;286;298;320;330;351;372;401;499;515;548;598;622;625
CCLE Hybrid Capture Mutations	AMER1	AMER1_p._ANY_CODING_MUTATION	3;43;47;124;126;127;141;143;145;185;193;213;219;228;255;274;297;329;336;377;405;437;459;482;483;500;516;538
CCLE Hybrid Capture Mutations	AMHR2	AMHR2_p._ANY_CODING_MUTATION	20;128;129;132;135;145;183;193;206;213;218;220;313;327;360;403;510;533;574;593;644
CCLE Hybrid Capture Mutations	AMZ2	AMZ2_p._ANY_CODING_MUTATION	135;152;174;225;237;244;357;385;386;469;504;510
CCLE Hybrid Capture Mutations	ANAPC5	ANAPC5_p._ANY_CODING_MUTATION	15;17;48;70;124;128;136;138;145;170;193;197;209;213;218;219;272;330;348;416;509;606;613;644
CCLE Hybrid Capture Mutations	ANGPTL4	ANGPTL4_p._ANY_CODING_MUTATION	15;50;135;189;315;317;437
CCLE Hybrid Capture Mutations	ANKK1	ANKK1_p._ANY_CODING_MUTATION	128;135;141;183;189;221;266;314;340;364;520;524;532;575;612
CCLE Hybrid Capture Mutations	APAF1	APAF1_p._ANY_CODING_MUTATION	57;126;128;131;134;144;157;164;185;189;199;203;218;219;267;283;305;318;332;500;576;584;616;639;644
CCLE Hybrid Capture Mutations	APBB1IP	APBB1IP_p._ANY_CODING_MUTATION	20;37;126;128;141;148;193;195;198;298;311;325;383;390;391;512;538
CCLE Hybrid Capture Mutations	APC	APC_p._ANY_CODING_MUTATION	34;42;56;77;102;116;126;128;129;131;132;133;134;135;141;143;144;146;148;152;174;182;183;184;185;186;187;189;193;195;196;197;198;199;200;201;202;203;205;207;208;209;211;212;213;214;216;218;219;220;221;222;223;224;225;226;227;228;229;230;236;256;268;276;280;281;296;301;310;314;325;331;333;347;364;377;389;390;404;411;425;436;469;474;481;490;493;500;537;543;545;547;567;571;577;579;580;582;583;590;597…
CCLE Hybrid Capture Mutations	APC	APC_p.E1554	185;186;187;195;196;205;208;220;268;469;571;577
CCLE Hybrid Capture Mutations	APC	APC_p.E1554fs	185;186;187;195;196;205;208;220;268;469;571;577
CCLE Hybrid Capture Mutations	APC	APC_p.Q1429	207;222;229
CCLE Hybrid Capture Mutations	APC	APC_p.R1450	201;218;223;228;590
CCLE Hybrid Capture Mutations	APC	APC_p.R1450*	201;218;223;228;590
CCLE Hybrid Capture Mutations	APC	APC_p.X2122	34;77;301
CCLE Hybrid Capture Mutations	APC	APC_p.X2122ins	34;77;301
CCLE Hybrid Capture Mutations	APC	APC_p.X2122insA	34;77;301
CCLE Hybrid Capture Mutations	AR	AR_p._ANY_CODING_MUTATION	23;51;70;128;130;134;135;137;141;189;195;200;209;210;213;218;226;237;238;255;283;364;405;417;420;498;500;513;576;585;589;603;644;645
CCLE Hybrid Capture Mutations	ARAF	ARAF_p._ANY_CODING_MUTATION	60;101;124;128;132;135;183;185;189;210;214;275;307;339;367;394;437;500;592;613
CCLE Hybrid Capture Mutations	ARFGEF1	ARFGEF1_p._ANY_CODING_MUTATION	16;37;60;124;126;128;131;132;135;141;144;185;189;192;193;195;205;210;218;226;276;311;344;365;407;437;543;551;569;598;613;625;628;664
CCLE Hybrid Capture Mutations	ARFGEF1	ARFGEF1_p.P1552	124;185;226
CCLE Hybrid Capture Mutations	ARFGEF1	ARFGEF1_p.P1552fs	124;185;226
CCLE Hybrid Capture Mutations	ARHGAP26	ARHGAP26_p._ANY_CODING_MUTATION	78;114;128;129;141;189;195;211;213;218;221;252;296;554
CCLE Hybrid Capture Mutations	ARHGAP29	ARHGAP29_p._ANY_CODING_MUTATION	40;125;126;128;137;141;143;146;157;171;189;218;221;255;260;344;392;451;460;504;516;584;611
CCLE Hybrid Capture Mutations	ARHGDIB	ARHGDIB_p._ANY_CODING_MUTATION	87;213;214;218;276;381;391;462;534;644
CCLE Hybrid Capture Mutations	ARHGEF10	ARHGEF10_p._ANY_CODING_MUTATION	20;53;124;126;127;128;146;181;185;193;197;213;221;265;273;295;296;303;305;340;356;358;406;416;441;513;590;593;598;601;637;644
CCLE Hybrid Capture Mutations	ARHGEF12	ARHGEF12_p._ANY_CODING_MUTATION	7;53;102;116;130;131;132;141;152;189;193;210;218;248;251;276;338;339;351;366;379;383;385;394;420;535;562;584;607;609;613;638
CCLE Hybrid Capture Mutations	ARHGEF7	ARHGEF7_p._ANY_CODING_MUTATION	5;16;31;44;76;124;129;130;132;135;145;151;185;193;196;198;203;213;296;340;366;382;386;489;498;515;538;559;624;644
CCLE Hybrid Capture Mutations	ARHGEF7	ARHGEF7_p.E218	5;16;76;129
CCLE Hybrid Capture Mutations	ARHGEF7	ARHGEF7_p.E218D	5;16;76;129
CCLE Hybrid Capture Mutations	ARID1A	ARID1A_p._ANY_CODING_MUTATION	6;14;16;44;53;62;68;73;82;114;124;126;128;130;131;132;133;135;136;137;138;139;141;143;144;145;146;150;157;198;199;202;203;210;213;218;219;220;221;226;229;247;248;250;259;268;280;311;314;325;327;340;344;348;359;368;369;373;377;383;394;408;412;416;420;427;430;436;437;439;444;449;459;463;466;467;479;498;500;513;533;543;571;575;584;592;593;595;606;613;616;628;638;644;650;652;654;664
CCLE Hybrid Capture Mutations	ARID1A	ARID1A_p.G1847	126;139;198;327;420;498;584;592
CCLE Hybrid Capture Mutations	ARID1A	ARID1A_p.G1847fs	126;139;198;327;420;498;584;592
CCLE Hybrid Capture Mutations	ARID1A	ARID1A_p.G1848	44;124;136;146;210;268
CCLE Hybrid Capture Mutations	ARID1A	ARID1A_p.G1848fs	44;124;136;146;210;268
CCLE Hybrid Capture Mutations	ARID1A	ARID1A_p.M274	143;420;571
CCLE Hybrid Capture Mutations	ARID1A	ARID1A_p.M274fs	143;420;571
CCLE Hybrid Capture Mutations	ARID1A	ARID1A_p.P2139	137;146;199
CCLE Hybrid Capture Mutations	ARID1A	ARID1A_p.P2139fs	137;146;199
CCLE Hybrid Capture Mutations	ARNT	ARNT_p._ANY_CODING_MUTATION	15;68;111;122;128;129;131;133;144;147;174;212;213;220;226;237;245;246;364;390;433;445;480;499;536;553;624
CCLE Hybrid Capture Mutations	ARNT	ARNT_p.P706	15;111;122;147;174;237;245;246;390;445;624
CCLE Hybrid Capture Mutations	ARNT	ARNT_p.P706L	15;111;122;147;174;237;245;246;390;445;624
CCLE Hybrid Capture Mutations	ASH2L	ASH2L_p._ANY_CODING_MUTATION	130;131;169;213;266;338;463;498
CCLE Hybrid Capture Mutations	ASPH	ASPH_p._ANY_CODING_MUTATION	5;20;22;30;41;43;50;51;53;56;58;62;63;67;70;74;77;78;85;89;90;93;98;101;105;112;122;124;132;134;136;141;145;151;152;162;164;167;169;170;171;172;173;174;176;189;191;203;208;213;218;224;225;233;235;236;237;247;249;252;255;257;260;271;273;275;277;286;291;297;298;299;306;311;319;328;329;332;335;338;339;371;389;391;392;396;405;408;418;420;422;423;424;425;426;435;436;439;440;442;447;450;455;463;469;477…
CCLE Hybrid Capture Mutations	ASPH	ASPH_p.A264	5;20;30;41;43;50;51;56;58;62;63;67;74;78;85;89;93;101;105;112;122;132;134;141;151;152;162;164;167;169;170;171;172;173;174;176;191;208;218;224;225;233;235;236;237;247;249;252;255;257;260;271;273;275;277;286;291;297;299;306;311;328;329;332;335;338;339;371;389;392;396;405;418;422;423;424;425;426;435;436;439;440;447;450;455;463;469;477;478;479;481;483;487;489;512;519;521;524;525;531;532;535;537;538;5…
CCLE Hybrid Capture Mutations	ASPH	ASPH_p.A264splice	5;20;30;41;43;50;51;56;58;62;63;67;74;78;85;89;93;101;105;112;122;132;134;141;151;152;162;164;167;169;170;171;172;173;174;176;191;208;218;224;225;233;235;236;237;247;249;252;255;257;260;271;273;275;277;286;291;297;299;306;311;328;329;332;335;338;339;371;389;392;396;405;418;422;423;424;425;426;435;436;439;440;447;450;455;463;469;477;478;479;481;483;487;489;512;519;521;524;525;531;532;535;537;538;5…
CCLE Hybrid Capture Mutations	ASPSCR1	ASPSCR1_p._ANY_CODING_MUTATION	46;68;130;131;136;137;157;192;276;408;623
CCLE Hybrid Capture Mutations	ASTN1	ASTN1_p._ANY_CODING_MUTATION	7;10;33;70;78;128;129;132;141;193;196;198;205;210;213;221;246;247;254;257;276;278;282;291;293;294;332;344;348;356;364;368;377;381;407;417;450;454;459;479;498;499;501;503;507;513;537;538;540;557;592;596;599;621;633;664
CCLE Hybrid Capture Mutations	ATF1	ATF1_p._ANY_CODING_MUTATION	23;122;128;198;376;579;598;621
CCLE Hybrid Capture Mutations	ATF2	ATF2_p._ANY_CODING_MUTATION	49;103;132;137;195;202;245;275;301;312;332;341;358;420;471;571;613;653;664
CCLE Hybrid Capture Mutations	ATIC	ATIC_p._ANY_CODING_MUTATION	126;192;197;198;215;218;351;420;442;482;562;611
CCLE Hybrid Capture Mutations	ATM	ATM_p._ANY_CODING_MUTATION	2;40;52;53;70;96;127;128;130;131;132;135;137;138;141;145;163;185;189;191;193;195;198;203;207;208;212;213;214;218;219;221;229;232;237;239;241;265;269;272;283;294;300;308;312;318;320;321;326;338;340;344;348;350;360;364;366;384;390;400;420;424;433;435;438;444;453;468;471;481;510;527;531;555;564;571;582;599;622;633;644;664
CCLE Hybrid Capture Mutations	ATP10A	ATP10A_p._ANY_CODING_MUTATION	54;58;117;128;130;132;135;136;137;139;141;144;146;156;173;189;193;195;199;202;203;213;216;220;226;239;299;308;312;313;344;351;352;358;371;394;405;420;460;464;473;490;530;538;557;570;592;613;620;656
CCLE Hybrid Capture Mutations	ATP10A	ATP10A_p.R244	173;216;239
CCLE Hybrid Capture Mutations	ATP10A	ATP10A_p.R244C	173;216;239
CCLE Hybrid Capture Mutations	ATP11A	ATP11A_p._ANY_CODING_MUTATION	7;67;84;127;128;129;131;136;137;145;166;192;201;210;213;215;218;263;266;268;272;294;310;340;358;369;373;376;389;404;439;488;536
CCLE Hybrid Capture Mutations	ATP13A5	ATP13A5_p._ANY_CODING_MUTATION	1;23;129;132;135;141;157;158;189;193;195;205;208;210;213;226;241;336;356;389;393;394;410;438;440;443;456;505;510;531;538;562;612;624;631;637;644;648
CCLE Hybrid Capture Mutations	ATP13A5	ATP13A5_p.W57	1;336;456;505
CCLE Hybrid Capture Mutations	ATP13A5	ATP13A5_p.W57fs	1;336;456
CCLE Hybrid Capture Mutations	ATP8B1	ATP8B1_p._ANY_CODING_MUTATION	8;16;108;113;121;126;128;129;130;131;132;141;143;179;185;193;199;213;215;218;219;220;226;301;311;390;403;413;420;498;500;521;531;538;576;584;587;595;598;629
CCLE Hybrid Capture Mutations	ATP8B1	ATP8B1_p.N205	130;131;143;213;226;584
CCLE Hybrid Capture Mutations	ATP8B1	ATP8B1_p.N205fs	130;131;143;213;226;584
CCLE Hybrid Capture Mutations	ATP8B1	ATP8B1_p.R384	8;108;113;121;179;403;587
CCLE Hybrid Capture Mutations	ATP8B1	ATP8B1_p.R384H	8;108;113;121;179;403;587
CCLE Hybrid Capture Mutations	ATR	ATR_p._ANY_CODING_MUTATION	10;17;75;89;90;95;103;126;128;129;130;131;132;135;136;137;138;141;144;150;156;158;183;189;193;195;203;218;219;220;226;230;253;266;298;303;305;312;319;323;326;329;338;342;343;346;348;351;365;374;387;390;392;424;437;438;449;462;474;480;494;498;500;524;535;538;575;581;582;584;598;613;622;631;641;642
CCLE Hybrid Capture Mutations	ATR	ATR_p.I774	126;129;130;131;135;136;137;144;183;189;203;219;220;498;575;584
CCLE Hybrid Capture Mutations	ATR	ATR_p.I774fs	126;129;130;131;135;136;137;144;183;189;203;219;220;498;575;584
CCLE Hybrid Capture Mutations	ATR	ATR_p.R109	158;387;424;480;622
CCLE Hybrid Capture Mutations	ATR	ATR_p.R109W	158;387;424;480;622
CCLE Hybrid Capture Mutations	ATRX	ATRX_p._ANY_CODING_MUTATION	48;49;68;75;84;117;122;126;128;129;130;131;136;137;141;146;156;177;183;185;189;192;193;195;197;201;203;215;218;219;224;226;229;266;280;301;353;358;365;370;380;399;405;417;450;479;500;504;512;524;541;560;573;576;594;606;613;616;618;640;647;653;664
CCLE Hybrid Capture Mutations	ATRX	ATRX_p.E1459	84;224;524
CCLE Hybrid Capture Mutations	ATRX	ATRX_p.E1459indel2>E	84;224;524
CCLE Hybrid Capture Mutations	ATRX	ATRX_p.P609	280;647;664
CCLE Hybrid Capture Mutations	ATRX	ATRX_p.P609A	280;647;664
CCLE Hybrid Capture Mutations	AURKA	AURKA_p._ANY_CODING_MUTATION	126;128;178;193;197;210;213;247;348;535;663
CCLE Hybrid Capture Mutations	AURKB	AURKB_p._ANY_CODING_MUTATION	128;132;189;226;351;529;530;552
CCLE Hybrid Capture Mutations	AURKC	AURKC_p._ANY_CODING_MUTATION	79;129;193;195;213;342;394;500;538;540
CCLE Hybrid Capture Mutations	AXIN1	AXIN1_p._ANY_CODING_MUTATION	14;115;128;157;189;193;198;218;220;239;240;248;285;416;498;508;584
CCLE Hybrid Capture Mutations	AXIN1	AXIN1_p.E640	198;220;416
CCLE Hybrid Capture Mutations	AXIN1	AXIN1_p.E640fs	198;220;416
CCLE Hybrid Capture Mutations	AXIN2	AXIN2_p._ANY_CODING_MUTATION	8;130;131;135;136;137;144;150;189;197;199;202;220;225;312;383;393;465;477;504;571;575;644
CCLE Hybrid Capture Mutations	AXIN2	AXIN2_p.G665	130;131;220;575
CCLE Hybrid Capture Mutations	AXIN2	AXIN2_p.G665fs	130;131;220;575
CCLE Hybrid Capture Mutations	AXL	AXL_p._ANY_CODING_MUTATION	46;50;105;125;132;135;136;189;192;193;196;198;213;219;220;221;257;264;267;288;292;301;308;349;396;413;427;435;443;479;498;541;584;585;609;653
CCLE Hybrid Capture Mutations	AXL	AXL_p.Y703	105;292;541
CCLE Hybrid Capture Mutations	AXL	AXL_p.Y703*	105;292;541
CCLE Hybrid Capture Mutations	B3GALT6	B3GALT6_p._ANY_CODING_MUTATION	115;189;210;268;420;453
CCLE Hybrid Capture Mutations	B3GALT6	B3GALT6_p.P194	189;210;268
CCLE Hybrid Capture Mutations	B3GALT6	B3GALT6_p.P194fs	189;210;268
CCLE Hybrid Capture Mutations	BAD	BAD_p._ANY_CODING_MUTATION	133;269;422;664
CCLE Hybrid Capture Mutations	BAG4	BAG4_p._ANY_CODING_MUTATION	129;136;183;203;207;212;338;364;416;420;490;663
CCLE Hybrid Capture Mutations	BAG4	BAG4_p.E453	129;183;203
CCLE Hybrid Capture Mutations	BAG4	BAG4_p.E453fs	129;183;203
CCLE Hybrid Capture Mutations	BAG6	BAG6_p._ANY_CODING_MUTATION	52;98;99;128;130;131;137;139;144;185;189;199;203;213;226;286;292;437;555;571;641;644
CCLE Hybrid Capture Mutations	BAG6	BAG6_p.P396	128;139;144;185;189;199;437;641
CCLE Hybrid Capture Mutations	BAG6	BAG6_p.P396fs	128;139;144;185;189;199;437;641
CCLE Hybrid Capture Mutations	BAI1	BAI1_p._ANY_CODING_MUTATION	70;102;125;130;132;135;145;163;170;183;189;192;195;202;211;213;218;219;226;269;273;325;328;333;340;368;395;416;464;575;584;606
CCLE Hybrid Capture Mutations	BAI1	BAI1_p.N444	170;269;464
CCLE Hybrid Capture Mutations	BAI1	BAI1_p.N444S	170;269;464
CCLE Hybrid Capture Mutations	BAI3	BAI3_p._ANY_CODING_MUTATION	10;31;44;67;80;84;89;99;126;128;130;131;132;137;141;145;157;171;189;193;195;197;199;202;204;205;213;215;218;228;258;264;266;267;274;276;277;300;308;314;315;317;324;325;335;338;340;345;351;356;364;380;400;425;449;471;477;515;532;535;536;537;538;545;554;590;606;633;636;644;647;651;652
CCLE Hybrid Capture Mutations	BAP1	BAP1_p._ANY_CODING_MUTATION	68;129;130;131;146;162;172;178;180;183;189;193;210;258;268;339;491;496;644;656
CCLE Hybrid Capture Mutations	BAX	BAX_p._ANY_CODING_MUTATION	52;124;133;135;136;143;145;150;189;192;198;199;202;213;218;220;221;292;416;437;498;584;664
CCLE Hybrid Capture Mutations	BAX	BAX_p.M38	133;135;136;143;145;150;192;198;199;202;213;220;221;416;437;498;584
CCLE Hybrid Capture Mutations	BAX	BAX_p.M38fs	133;135;136;143;145;150;192;198;199;202;213;220;221;416;437;498;584
CCLE Hybrid Capture Mutations	BCAR1	BCAR1_p._ANY_CODING_MUTATION	77;129;135;146;232;386;503;538;542;620
CCLE Hybrid Capture Mutations	BCKDK	BCKDK_p._ANY_CODING_MUTATION	124;137;145;146;192;198;202;213;293;341;344;494
CCLE Hybrid Capture Mutations	BCL10	BCL10_p._ANY_CODING_MUTATION	39;126;133;144;189;198;199;296;372;442;499;512;593
CCLE Hybrid Capture Mutations	BCL10	BCL10_p.T162	133;296;372;442;593
CCLE Hybrid Capture Mutations	BCL10	BCL10_p.T162M	133;296;372;442;593
CCLE Hybrid Capture Mutations	BCL11A	BCL11A_p._ANY_CODING_MUTATION	126;132;135;145;192;202;204;213;260;277;280;286;364;365;370;407;416;437;449;450;461;477;510;559;613
CCLE Hybrid Capture Mutations	BCL11B	BCL11B_p._ANY_CODING_MUTATION	19;135;145;157;189;198;213;215;260;276;328;333;344;441;444;513;534
CCLE Hybrid Capture Mutations	BCL2L1	BCL2L1_p._ANY_CODING_MUTATION	16;41;195;240;394;527;570;594
CCLE Hybrid Capture Mutations	BCL2L11	BCL2L11_p._ANY_CODING_MUTATION	71;136;213;221;265;296;499
CCLE Hybrid Capture Mutations	BCL3	BCL3_p._ANY_CODING_MUTATION	136;213;221;229;285;325;407;416;420
CCLE Hybrid Capture Mutations	BCL6	BCL6_p._ANY_CODING_MUTATION	128;136;139;150;195;197;203;213;218;226;266;279;356;382;511;555;572;654
CCLE Hybrid Capture Mutations	BCL9	BCL9_p._ANY_CODING_MUTATION	27;45;124;126;128;130;132;135;136;146;158;183;191;192;193;198;202;205;206;210;213;215;220;221;227;254;416;420;500;540;550;552;576;582;606
CCLE Hybrid Capture Mutations	BCL9	BCL9_p.G513	130;202;221
CCLE Hybrid Capture Mutations	BCL9	BCL9_p.G513fs	130;202;221
CCLE Hybrid Capture Mutations	BCL9	BCL9_p.P514	126;135;183;198;213;227;420
CCLE Hybrid Capture Mutations	BCL9	BCL9_p.P514fs	126;135;183;198;213;227;420
CCLE Hybrid Capture Mutations	BCR	BCR_p._ANY_CODING_MUTATION	38;63;64;72;102;124;126;136;144;147;151;166;203;210;229;250;275;295;313;350;368;372;373;390;426;432;445;466;488;500;535;538;554;625;651;662;664
CCLE Hybrid Capture Mutations	BID	BID_p._ANY_CODING_MUTATION	144;420;468
CCLE Hybrid Capture Mutations	BIK	BIK_p._ANY_CODING_MUTATION	80;340;391;600;619
CCLE Hybrid Capture Mutations	BIK	BIK_p.G153	391;600;619
CCLE Hybrid Capture Mutations	BIRC2	BIRC2_p._ANY_CODING_MUTATION	35;93;95;110;126;132;134;136;141;213;218;219;254;364;424;481;584;589
CCLE Hybrid Capture Mutations	BIRC2	BIRC2_p.S152	93;95;110;424
CCLE Hybrid Capture Mutations	BIRC2	BIRC2_p.S152A	93;95;110;424
CCLE Hybrid Capture Mutations	BIRC3	BIRC3_p._ANY_CODING_MUTATION	132;144;146;193;213;320;336;340;382;466;500;601;653
CCLE Hybrid Capture Mutations	BIRC5	BIRC5_p._ANY_CODING_MUTATION	189;215;218;584
CCLE Hybrid Capture Mutations	BIRC6	BIRC6_p._ANY_CODING_MUTATION	2;3;5;12;39;43;51;63;68;110;112;115;126;128;135;138;141;145;146;150;156;183;189;193;195;198;199;203;205;208;210;213;218;220;230;239;268;271;276;288;301;310;313;317;322;325;333;344;346;348;349;362;369;383;393;399;407;408;413;418;420;458;464;498;507;515;524;533;538;541;547;550;570;575;581;584;587;589;592;598;613;629;630;636;640;645;658
CCLE Hybrid Capture Mutations	BIRC6	BIRC6_p.S4151	2;12;205
CCLE Hybrid Capture Mutations	BIRC6	BIRC6_p.S4151T	2;12;205
CCLE Hybrid Capture Mutations	BIRC6	BIRC6_p.T2365	208;399;587;640
CCLE Hybrid Capture Mutations	BIRC6	BIRC6_p.T2365M	208;399;587;640
CCLE Hybrid Capture Mutations	BLK	BLK_p._ANY_CODING_MUTATION	39;91;128;136;141;144;195;210;213;220;259;275;398;433;512;540;559;571
CCLE Hybrid Capture Mutations	BLM	BLM_p._ANY_CODING_MUTATION	71;86;95;110;111;126;127;128;129;136;137;139;141;144;169;170;171;179;189;199;213;218;219;268;353;362;364;371;375;397;436;437;484;490;526;543;545;598;647
CCLE Hybrid Capture Mutations	BLM	BLM_p.G512	126;129;137;199;219;268;437
CCLE Hybrid Capture Mutations	BLM	BLM_p.G512fs	126;129;137;199;219;268;437
CCLE Hybrid Capture Mutations	BLNK	BLNK_p._ANY_CODING_MUTATION	21;115;126;128;134;138;193;195;198;230;308;465;488;499;533;538;579
CCLE Hybrid Capture Mutations	BLNK	BLNK_p.V182	21;488;579
CCLE Hybrid Capture Mutations	BLNK	BLNK_p.V182M	21;488;579
CCLE Hybrid Capture Mutations	BMF	BMF_p._ANY_CODING_MUTATION	128;129;195;343;533;652
CCLE Hybrid Capture Mutations	BMI1	BMI1_p._ANY_CODING_MUTATION	43;44;141;144;195;210;350;613
CCLE Hybrid Capture Mutations	BMP2K	BMP2K_p._ANY_CODING_MUTATION	3;38;52;53;71;108;132;133;136;141;183;185;189;193;195;203;218;220;226;276;297;315;340;368;413;435;447;503;511;523;533;553;554;584;592;593;596;619
CCLE Hybrid Capture Mutations	BMP2K	BMP2K_p.Q482	185;195;226;297;315;523;533;554;619
CCLE Hybrid Capture Mutations	BMP2K	BMP2K_p.Q482del	185;195;226;297;315;523;533;554;619
CCLE Hybrid Capture Mutations	BMP2K	BMP2K_p.Q482del4	185;195;226;297;315;523;533;554;619
CCLE Hybrid Capture Mutations	BMP2K	BMP2K_p.Q484	108;136;447;593
CCLE Hybrid Capture Mutations	BMP2K	BMP2K_p.Q484del	108;136;447;593
CCLE Hybrid Capture Mutations	BMP2K	BMP2K_p.Q484del3	108;136;447;593
CCLE Hybrid Capture Mutations	BMP2K	BMP2K_p.Q486	71;183;340
CCLE Hybrid Capture Mutations	BMP2K	BMP2K_p.Q486del	71;183;340
CCLE Hybrid Capture Mutations	BMP2K	BMP2K_p.Q486del1	71;183;340
CCLE Hybrid Capture Mutations	BMP4	BMP4_p._ANY_CODING_MUTATION	8;157;189;213;272;275;326;347;364;387;403;576;585;626;648
CCLE Hybrid Capture Mutations	BMP4	BMP4_p.K75	8;387;585
CCLE Hybrid Capture Mutations	BMP4	BMP4_p.K75R	8;387;585
CCLE Hybrid Capture Mutations	BMPR1A	BMPR1A_p._ANY_CODING_MUTATION	33;120;128;132;135;161;183;195;198;210;213;230;232;313;326;362;437;489;632
CCLE Hybrid Capture Mutations	BMPR1B	BMPR1B_p._ANY_CODING_MUTATION	102;128;132;135;138;141;195;218;221;256;336;350;499;538;545;627;638
CCLE Hybrid Capture Mutations	BMPR2	BMPR2_p._ANY_CODING_MUTATION	38;68;126;128;130;131;135;137;144;145;183;185;189;192;193;198;199;202;203;204;210;213;214;215;218;219;298;300;305;335;424;437;461;500;529;530;628;643
CCLE Hybrid Capture Mutations	BMPR2	BMPR2_p.E581	137;145;183;185;189;192;198;199;202;203;210;215;437
CCLE Hybrid Capture Mutations	BMPR2	BMPR2_p.E581fs	137;145;183;185;189;192;198;199;202;203;210;215;437
CCLE Hybrid Capture Mutations	BMPR2	BMPR2_p.R259	130;131;335;461
CCLE Hybrid Capture Mutations	BMPR2	BMPR2_p.R259C	130;131;461
CCLE Hybrid Capture Mutations	BMX	BMX_p._ANY_CODING_MUTATION	93;124;126;132;134;141;144;161;189;193;218;310;367;500;550;552;571;645
CCLE Hybrid Capture Mutations	BNIP3	BNIP3_p._ANY_CODING_MUTATION	222;306;584
CCLE Hybrid Capture Mutations	BRAF	BRAF_p._ANY_CODING_MUTATION	22;67;69;79;82;85;101;130;131;137;141;144;145;183;185;186;187;195;196;197;198;202;203;204;205;206;208;210;215;221;223;243;255;277;317;318;322;338;372;380;408;417;419;498;505;506;507;508;510;511;512;515;516;524;527;529;530;532;533;534;535;536;539;540;542;543;544;545;547;548;549;550;551;552;553;554;555;559;599;600;601;653
CCLE Hybrid Capture Mutations	BRAF	BRAF_p.V600	22;79;85;101;185;186;187;196;203;205;208;210;221;223;243;417;505;506;507;508;510;511;512;515;516;527;529;530;532;533;534;535;536;539;540;542;543;544;547;548;549;550;551;552;553;554;555;559;599;600;601
CCLE Hybrid Capture Mutations	BRAF	BRAF_p.V600E	22;79;85;101;185;186;187;196;203;208;210;221;223;243;417;505;506;507;508;510;511;512;515;516;527;529;530;532;533;534;535;536;539;540;542;543;544;547;548;549;551;553;554;555;559;599;600;601
CCLE Hybrid Capture Mutations	BRCA1	BRCA1_p._ANY_CODING_MUTATION	49;103;132;133;136;137;138;139;157;183;193;195;210;218;220;257;265;298;311;326;367;380;383;398;411;420;423;509;549;583;589;597;606;635;641;642;664
CCLE Hybrid Capture Mutations	BRCA2	BRCA2_p._ANY_CODING_MUTATION	9;23;39;40;49;53;68;75;98;126;128;129;132;139;141;144;145;157;183;189;191;192;193;195;198;202;203;210;213;215;218;221;225;226;237;246;273;292;299;306;364;365;373;392;401;403;420;424;439;490;498;499;506;513;548;561;582;632
CCLE Hybrid Capture Mutations	BRCA2	BRCA2_p.G1529	141;144;490
CCLE Hybrid Capture Mutations	BRCA2	BRCA2_p.Q1782	193;198;210;226
CCLE Hybrid Capture Mutations	BRCA2	BRCA2_p.Q1782fs	193;198;210;226
CCLE Hybrid Capture Mutations	BRCA2	BRCA2_p.T3030	183;202;498
CCLE Hybrid Capture Mutations	BRCA2	BRCA2_p.T3030fs	183;202;498
CCLE Hybrid Capture Mutations	BRCC3	BRCC3_p._ANY_CODING_MUTATION	137;138;210;225;268;332;342;549;617
CCLE Hybrid Capture Mutations	BRD2	BRD2_p._ANY_CODING_MUTATION	2;19;27;31;54;126;128;137;138;147;195;219;235;252;300;351;384;426;482;484;490;492;507;537;555;627;635;641;642;656
CCLE Hybrid Capture Mutations	BRD2	BRD2_p.E500	2;31;195;252;384;426;482;484;490;492;507;537;555;627
CCLE Hybrid Capture Mutations	BRD2	BRD2_p.E500del	2;31;195;252;384;426;482;484;490;492;507;537;555;627
CCLE Hybrid Capture Mutations	BRD2	BRD2_p.E500del1	2;31;195;252;384;426;482;484;490;492;507;537;555;627
CCLE Hybrid Capture Mutations	BRD3	BRD3_p._ANY_CODING_MUTATION	115;128;130;131;133;135;139;143;144;145;146;189;192;193;195;196;202;203;218;219;220;221;226;253;268;389;390;403;416;420;437;449;450;480;535;538;547;571
CCLE Hybrid Capture Mutations	BRD3	BRD3_p.P24	128;130;131;133;139;143;144;145;146;189;192;202;203;219;220;221;226;268;420;437;449;571
CCLE Hybrid Capture Mutations	BRD3	BRD3_p.P24fs	128;130;131;133;139;143;144;145;146;189;192;202;203;219;220;221;226;268;420;437;449;571
CCLE Hybrid Capture Mutations	BRD4	BRD4_p._ANY_CODING_MUTATION	43;46;58;70;130;135;136;144;146;193;198;201;203;209;210;213;226;235;367;379;436;537;538;541;575;645
CCLE Hybrid Capture Mutations	BRDT	BRDT_p._ANY_CODING_MUTATION	40;76;105;132;136;137;144;198;232;254;263;272;308;315;334;343;351;383;399;416;572
CCLE Hybrid Capture Mutations	BRF2	BRF2_p._ANY_CODING_MUTATION	141;437;548;584
CCLE Hybrid Capture Mutations	BRIP1	BRIP1_p._ANY_CODING_MUTATION	3;40;76;95;110;128;129;132;133;135;136;146;202;208;213;218;219;220;236;259;260;313;348;350;362;365;380;437;446;539;562;587;622;635
CCLE Hybrid Capture Mutations	BRIP1	BRIP1_p.G481	95;208;437
CCLE Hybrid Capture Mutations	BRIP1	BRIP1_p.Q944	110;236;635
CCLE Hybrid Capture Mutations	BRIP1	BRIP1_p.Q944E	110;236;635
CCLE Hybrid Capture Mutations	BRSK1	BRSK1_p._ANY_CODING_MUTATION	128;130;138;144;189;192;210;219;220;255;267;312;333;416;445;500;513;538;611;636;639
CCLE Hybrid Capture Mutations	BRSK1	BRSK1_p.D392	138;192;220;416;500
CCLE Hybrid Capture Mutations	BRSK1	BRSK1_p.D392fs	138;192;220;416;500
CCLE Hybrid Capture Mutations	BRSK2	BRSK2_p._ANY_CODING_MUTATION	128;133;135;144;146;196;197;221;344;351;373;416;513;584;626
CCLE Hybrid Capture Mutations	BTG1	BTG1_p._ANY_CODING_MUTATION	128;325;492;575
CCLE Hybrid Capture Mutations	BTK	BTK_p._ANY_CODING_MUTATION	43;128;133;145;183;189;203;299;308;318;336;348;500;537;594;601
CCLE Hybrid Capture Mutations	BTRC	BTRC_p._ANY_CODING_MUTATION	46;79;80;128;132;133;174;198;215;218;221;227;250;298;313;317;350;418;425
CCLE Hybrid Capture Mutations	BTRC	BTRC_p.L95	79;298;425
CCLE Hybrid Capture Mutations	BTRC	BTRC_p.L95S	79;298;425
CCLE Hybrid Capture Mutations	BUB1	BUB1_p._ANY_CODING_MUTATION	86;99;126;130;131;132;171;193;195;197;210;218;219;220;258;357;382;420;498;549;599;653;664
CCLE Hybrid Capture Mutations	BUB1B	BUB1B_p._ANY_CODING_MUTATION	22;38;40;41;72;98;124;132;144;195;209;244;368;380;426;438;443;496;576;584;592
CCLE Hybrid Capture Mutations	C9orf96	C9orf96_p._ANY_CODING_MUTATION	102;121;145;179;192;198;203;209;213;219;291;311;374;389;647
CCLE Hybrid Capture Mutations	C9orf96	C9orf96_p.L631	102;121;179;291;389
CCLE Hybrid Capture Mutations	C9orf96	C9orf96_p.L631P	102;121;179;291;389
CCLE Hybrid Capture Mutations	CACNA1F	CACNA1F_p._ANY_CODING_MUTATION	1;9;13;33;41;53;75;77;82;109;124;126;127;129;133;135;150;185;189;192;193;195;210;219;226;260;273;274;275;291;307;313;321;368;372;384;397;420;449;467;473;498;531;542;573;583;591;599;605;606;621;653;664
CCLE Hybrid Capture Mutations	CACNA1F	CACNA1F_p.E815	1;13;33;41;53;75;77;260;274;275;307;321;368;384;397;467;473;591;605;606
CCLE Hybrid Capture Mutations	CACNA1F	CACNA1F_p.E815indel1>EE	1;13;33;41;53;75;77;260;274;275;307;321;368;384;397;467;473;591;605;606
CCLE Hybrid Capture Mutations	CACNB2	CACNB2_p._ANY_CODING_MUTATION	126;130;132;135;139;157;168;178;179;189;195;218;228;298;303;304;350;358;387;390;405;407;437;467;503;506;508;555;589;590
CCLE Hybrid Capture Mutations	CACNB2	CACNB2_p.S557	178;179;390;589
CCLE Hybrid Capture Mutations	CACNB2	CACNB2_p.S557L	178;179;390;589
CCLE Hybrid Capture Mutations	CACNB2	CACNB2_p.S643	126;139;437
CCLE Hybrid Capture Mutations	CACNB2	CACNB2_p.S643fs	126;139;437
CCLE Hybrid Capture Mutations	CAD	CAD_p._ANY_CODING_MUTATION	70;80;100;117;126;128;132;135;137;139;141;143;144;146;149;156;157;189;195;198;199;203;218;219;227;274;370;380;383;435;441;498;500;535;575;599;619;637;643;644
CCLE Hybrid Capture Mutations	CAMK1	CAMK1_p._ANY_CODING_MUTATION	10;129;143;157;189;193;218;321;362;542
CCLE Hybrid Capture Mutations	CAMK1D	CAMK1D_p._ANY_CODING_MUTATION	81;128;137;141;189;248;340;481;498;534;576
CCLE Hybrid Capture Mutations	CAMK1G	CAMK1G_p._ANY_CODING_MUTATION	36;54;132;202;219;305;340;373;381;407;504;538
CCLE Hybrid Capture Mutations	CAMK2A	CAMK2A_p._ANY_CODING_MUTATION	22;127;136;144;149;176;310
CCLE Hybrid Capture Mutations	CAMK2B	CAMK2B_p._ANY_CODING_MUTATION	128;189;221;340;498;500;512;645
CCLE Hybrid Capture Mutations	CAMK2D	CAMK2D_p._ANY_CODING_MUTATION	7;136;138;218;271;305;340;580;636;643
CCLE Hybrid Capture Mutations	CAMK2G	CAMK2G_p._ANY_CODING_MUTATION	7;53;128;135;157;197;213;500;538;600;637
CCLE Hybrid Capture Mutations	CAMK4	CAMK4_p._ANY_CODING_MUTATION	57;141;157;183;193;195;213;218;255;268;305;332;349;364;369;403;500;538;540;613;664
CCLE Hybrid Capture Mutations	CAMKK1	CAMKK1_p._ANY_CODING_MUTATION	108;128;135;368;416;500
CCLE Hybrid Capture Mutations	CAMKK2	CAMKK2_p._ANY_CODING_MUTATION	54;126;128;169;199;218;266;313;538;583;644;653
CCLE Hybrid Capture Mutations	CAMKV	CAMKV_p._ANY_CODING_MUTATION	99;128;130;131;135;137;150;193;206;215;219;237;336;365;389;433;437;535;613;664
CCLE Hybrid Capture Mutations	CARD10	CARD10_p._ANY_CODING_MUTATION	17;23;36;37;52;53;54;57;72;77;79;89;96;98;111;112;113;117;121;124;128;130;131;144;145;150;157;167;176;177;185;189;197;202;204;213;219;222;227;233;235;245;246;255;256;258;263;271;287;291;296;300;301;316;319;328;332;339;340;347;351;357;358;359;373;375;377;379;384;385;388;389;396;400;410;418;419;435;445;446;456;464;465;468;473;477;503;510;544;545;553;557;564;571;581;587;597;600;601;612;621;627;638;6…
CCLE Hybrid Capture Mutations	CARD10	CARD10_p.K272	17;23;36;37;52;53;54;57;72;77;79;89;96;98;111;112;117;121;124;144;157;167;176;177;189;197;204;219;222;227;233;235;245;246;255;256;258;263;271;287;291;296;300;301;316;319;328;332;339;340;347;357;358;359;373;375;377;379;384;385;388;389;396;410;418;419;435;445;446;456;464;465;468;473;503;510;544;545;553;557;564;571;587;597;600;601;621;627;638;650;663
CCLE Hybrid Capture Mutations	CARD10	CARD10_p.K272del	17;23;36;37;52;53;54;57;72;77;79;89;96;98;111;112;117;121;124;144;157;167;176;177;189;197;204;219;222;227;233;235;245;246;255;256;258;263;271;287;291;296;300;301;316;319;328;332;339;340;347;357;358;359;373;375;377;379;384;385;388;389;396;410;418;419;435;445;446;456;464;465;468;473;503;510;544;545;553;557;564;571;587;597;600;601;621;627;638;650;663
CCLE Hybrid Capture Mutations	CARD10	CARD10_p.K272del2	17;23;36;37;52;53;54;57;72;77;79;89;96;98;111;112;117;121;124;144;157;167;176;177;189;197;204;219;222;227;233;235;245;246;255;256;258;263;271;287;291;296;300;301;316;319;328;332;339;340;347;357;358;359;373;375;377;379;384;385;388;389;396;410;418;419;435;445;446;456;464;465;468;473;503;510;544;545;553;557;564;571;587;597;600;601;621;627;638;650;663
CCLE Hybrid Capture Mutations	CARD11	CARD11_p._ANY_CODING_MUTATION	6;42;128;131;132;133;135;136;146;156;185;189;197;218;219;220;226;253;258;260;335;340;349;356;360;368;380;383;405;459;512;531;533;535;575;584
CCLE Hybrid Capture Mutations	CARD11	CARD11_p.R555	135;185;220;575;584
CCLE Hybrid Capture Mutations	CARD11	CARD11_p.R555fs	135;185;220;575;584
CCLE Hybrid Capture Mutations	CARD14	CARD14_p._ANY_CODING_MUTATION	6;7;124;129;135;146;157;189;206;308;418;498;573
CCLE Hybrid Capture Mutations	CARD9	CARD9_p._ANY_CODING_MUTATION	115;124;128;130;131;193;225;226;312;509;538;584;585;595
CCLE Hybrid Capture Mutations	CARS	CARS_p._ANY_CODING_MUTATION	7;71;103;110;128;150;193;202;213;218;220;229;268;284;301;348;358;364;391;478;479;542;543;604;608;647
CCLE Hybrid Capture Mutations	CASC5	CASC5_p._ANY_CODING_MUTATION	96;128;132;136;137;141;157;189;193;195;199;203;213;216;218;220;226;276;293;313;373;388;401;404;423;471;499;500;582;586;594;662
CCLE Hybrid Capture Mutations	CASK	CASK_p._ANY_CODING_MUTATION	126;129;135;136;141;146;150;183;189;197;210;213;218;226;265;283;385;538;592;613;619
CCLE Hybrid Capture Mutations	CASP1	CASP1_p._ANY_CODING_MUTATION	13;141;146;195;221;226;236;348;499;500;527;611;652
CCLE Hybrid Capture Mutations	CASP10	CASP10_p._ANY_CODING_MUTATION	14;41;129;132;178;193;203;210;213;221;326;347;420;538;560
CCLE Hybrid Capture Mutations	CASP2	CASP2_p._ANY_CODING_MUTATION	40;43;69;124;128;130;131;132;185;192;198;213;221;308;509;639;663
CCLE Hybrid Capture Mutations	CASP3	CASP3_p._ANY_CODING_MUTATION	61;85;132;139;189;210
CCLE Hybrid Capture Mutations	CASP4	CASP4_p._ANY_CODING_MUTATION	13;128;132;133;141;150;157;213;237;248;513;575
CCLE Hybrid Capture Mutations	CASP6	CASP6_p._ANY_CODING_MUTATION	53;67;139;220;421
CCLE Hybrid Capture Mutations	CASP7	CASP7_p._ANY_CODING_MUTATION	18;68;144;189;218;293;313;364;554;557;575
CCLE Hybrid Capture Mutations	CASP8	CASP8_p._ANY_CODING_MUTATION	128;130;131;132;141;145;193;199;203;210;220;226;268;387;411;420;480;509;522;541;559;562;576;618;619;622;623
CCLE Hybrid Capture Mutations	CASP8	CASP8_p.R127	130;131;562
CCLE Hybrid Capture Mutations	CASP9	CASP9_p._ANY_CODING_MUTATION	124;128;132;144;152;213;252;328;364;459;538;553
CCLE Hybrid Capture Mutations	CATSPERB	CATSPERB_p._ANY_CODING_MUTATION	10;48;128;132;141;189;195;209;218;222;226;294;350;385;404;436;493;499;513;531;538;553;555;650;658
CCLE Hybrid Capture Mutations	CBFA2T3	CBFA2T3_p._ANY_CODING_MUTATION	157;183;213;225;268;331;387;388;577
CCLE Hybrid Capture Mutations	CBFB	CBFB_p._ANY_CODING_MUTATION	150;280;362;498
CCLE Hybrid Capture Mutations	CBL	CBL_p._ANY_CODING_MUTATION	69;91;128;130;136;145;189;193;195;218;253;334;351;388;390;420;513;575;598;632
CCLE Hybrid Capture Mutations	CCDC170	CCDC170_p._ANY_CODING_MUTATION	44;89;128;132;133;152;170;195;199;208;218;244;251;308;351;417;420;449;469;499;502;538;625
CCLE Hybrid Capture Mutations	CCDC50	CCDC50_p._ANY_CODING_MUTATION	9;127;133;139;185;218;233;331;338;364;404;413;542
CCLE Hybrid Capture Mutations	CCDC6	CCDC6_p._ANY_CODING_MUTATION	132;141;145;195;218;330;392;576;578;654
CCLE Hybrid Capture Mutations	CCNA1	CCNA1_p._ANY_CODING_MUTATION	38;70;72;132;148;189;193;213;226;313;336;348;364;389;538;575
CCLE Hybrid Capture Mutations	CCNA2	CCNA2_p._ANY_CODING_MUTATION	116;128;132;135;291;375;386;441
CCLE Hybrid Capture Mutations	CCNA2	CCNA2_p.V72	291;375;386;441
CCLE Hybrid Capture Mutations	CCNA2	CCNA2_p.V72splice	291;375;386;441
CCLE Hybrid Capture Mutations	CCNB1	CCNB1_p._ANY_CODING_MUTATION	126;155;193;559;575
CCLE Hybrid Capture Mutations	CCNB1IP1	CCNB1IP1_p._ANY_CODING_MUTATION	126;132;141;221;397;420;506;590;653
CCLE Hybrid Capture Mutations	CCND1	CCND1_p._ANY_CODING_MUTATION	128;134;437;449;533;624
CCLE Hybrid Capture Mutations	CCND2	CCND2_p._ANY_CODING_MUTATION	2;17;193;203;213;227;310;575;624
CCLE Hybrid Capture Mutations	CCNE1	CCNE1_p._ANY_CODING_MUTATION	215;321;422;663
CCLE Hybrid Capture Mutations	CCNG1	CCNG1_p._ANY_CODING_MUTATION	19;128;146;220;386;505;613
CCLE Hybrid Capture Mutations	CCNT1	CCNT1_p._ANY_CODING_MUTATION	79;111;132;135;136;137;141;146;150;162;203;218;230;338;442;513;537;606;610;644;650
CCLE Hybrid Capture Mutations	CCR1	CCR1_p._ANY_CODING_MUTATION	23;192;297;415;531
CCLE Hybrid Capture Mutations	CCR4	CCR4_p._ANY_CODING_MUTATION	139;144;183;195;349;513;598;644
CCLE Hybrid Capture Mutations	CCR5	CCR5_p._ANY_CODING_MUTATION	24;91;126;128;132;137;142;195;345;421;479;561;604;608;640;651
CCLE Hybrid Capture Mutations	CCR5	CCR5_p.A298	421;479;640
CCLE Hybrid Capture Mutations	CCR5	CCR5_p.A298fs	421;479;640
CCLE Hybrid Capture Mutations	CCR5	CCR5_p.S63	24;91;142
CCLE Hybrid Capture Mutations	CCR5	CCR5_p.S63C	24;91;142
CCLE Hybrid Capture Mutations	CD160	CD160_p._ANY_CODING_MUTATION	132;199;202
CCLE Hybrid Capture Mutations	CD40	CD40_p._ANY_CODING_MUTATION	213;245;387;483;535;598
CCLE Hybrid Capture Mutations	CD40LG	CD40LG_p._ANY_CODING_MUTATION	47;203;304;340;361;590
CCLE Hybrid Capture Mutations	CD44	CD44_p._ANY_CODING_MUTATION	12;45;69;128;189;213;249;250;304;391;393;504;520;579;634
CCLE Hybrid Capture Mutations	CD44	CD44_p.P379	391;393;579
CCLE Hybrid Capture Mutations	CD44	CD44_p.P379A	391;393;579
CCLE Hybrid Capture Mutations	CD79A	CD79A_p._ANY_CODING_MUTATION	128;449;516;532;538
CCLE Hybrid Capture Mutations	CD79B	CD79B_p._ANY_CODING_MUTATION	2;132;144;213;268
CCLE Hybrid Capture Mutations	CDC25A	CDC25A_p._ANY_CODING_MUTATION	124;128;141;150;193;199;203;213;268;345;490;498;575
CCLE Hybrid Capture Mutations	CDC25C	CDC25C_p._ANY_CODING_MUTATION	99;139;157;185;189;195;199;203;213;218;221;268;430;535;575;603
CCLE Hybrid Capture Mutations	CDC25C	CDC25C_p.K322	139;199;213;221;268;575
CCLE Hybrid Capture Mutations	CDC25C	CDC25C_p.K322fs	139;199;213;221;268;575
CCLE Hybrid Capture Mutations	CDC34	CDC34_p._ANY_CODING_MUTATION	136;210;268;499;571;663
CCLE Hybrid Capture Mutations	CDC42	CDC42_p._ANY_CODING_MUTATION	63;124;286;367;477;613
CCLE Hybrid Capture Mutations	CDC42BPA	CDC42BPA_p._ANY_CODING_MUTATION	5;16;67;75;103;122;124;126;128;130;131;133;138;141;146;149;152;155;174;178;182;195;197;198;199;203;213;218;230;258;269;283;298;305;338;340;348;349;389;393;420;441;492;496;498;538;551;554;661
CCLE Hybrid Capture Mutations	CDC42BPB	CDC42BPB_p._ANY_CODING_MUTATION	45;69;70;132;133;135;137;138;141;144;195;196;203;213;215;229;263;268;285;339;348;351;388;395;398;400;401;405;449;456;498;500;503;567;575;644;650
CCLE Hybrid Capture Mutations	CDC42BPG	CDC42BPG_p._ANY_CODING_MUTATION	128;133;135;136;137;139;156;189;193;195;198;200;237;252;280;283;292;389;403;450;465;479;487;537;571;615;644
CCLE Hybrid Capture Mutations	CDC42BPG	CDC42BPG_p.R695	128;292;403;450;479
CCLE Hybrid Capture Mutations	CDC42BPG	CDC42BPG_p.R695G	128;292;403;450;479
CCLE Hybrid Capture Mutations	CDC5L	CDC5L_p._ANY_CODING_MUTATION	43;102;129;132;141;144;197;200;203;213;218;219;235;307;339;379;486;582;604;613;644
CCLE Hybrid Capture Mutations	CDC7	CDC7_p._ANY_CODING_MUTATION	128;132;136;141;144;202;210;213;215;219;239;254;313;323;348;584;613;617
CCLE Hybrid Capture Mutations	CDC73	CDC73_p._ANY_CODING_MUTATION	53;126;128;132;135;141;171;183;189;193;195;203;323;367;503;538;571;624
CCLE Hybrid Capture Mutations	CDH1	CDH1_p._ANY_CODING_MUTATION	20;43;46;70;75;128;151;157;189;192;195;213;219;272;341;379;392;395;403;464;499;500;575;576;584;586;593;606;663
CCLE Hybrid Capture Mutations	CDH11	CDH11_p._ANY_CODING_MUTATION	8;69;96;131;132;144;148;189;193;198;202;208;213;218;226;266;305;308;310;313;344;360;368;373;407;416;420;474;478;492;538;569;594;597;613
CCLE Hybrid Capture Mutations	CDH2	CDH2_p._ANY_CODING_MUTATION	17;53;67;70;114;130;141;157;185;189;195;206;208;213;218;219;232;258;274;301;305;320;329;349;351;364;365;380;401;403;499;522;537;559;575;587;598;624
CCLE Hybrid Capture Mutations	CDH3	CDH3_p._ANY_CODING_MUTATION	57;91;130;131;146;167;169;189;193;195;198;210;213;226;349;407;500;503;527
CCLE Hybrid Capture Mutations	CDK1	CDK1_p._ANY_CODING_MUTATION	137;141;193;218;267;346;395
CCLE Hybrid Capture Mutations	CDK10	CDK10_p._ANY_CODING_MUTATION	53;101;126;128;143;213;346;413;422;452;507;541;573;663
CCLE Hybrid Capture Mutations	CDK11A	CDK11A_p._ANY_CODING_MUTATION	42;101;203;238;257;420;500;616
CCLE Hybrid Capture Mutations	CDK11B	CDK11B_p._ANY_CODING_MUTATION	5;20;80;124;126;128;135;144;191;193;210;221;226;252;278;312;316;345;351;353;369;390;393;417;423;436;501;535;583;620;627;634
CCLE Hybrid Capture Mutations	CDK11B	CDK11B_p.G51	20;393;423
CCLE Hybrid Capture Mutations	CDK11B	CDK11B_p.G51Q	20;393;423
CCLE Hybrid Capture Mutations	CDK11B	CDK11B_p.K127	5;20;80;345;353;369;417;501;535;620
CCLE Hybrid Capture Mutations	CDK11B	CDK11B_p.K127splice	5;20;80;345;353;369;417;501;535;620
CCLE Hybrid Capture Mutations	CDK12	CDK12_p._ANY_CODING_MUTATION	3;128;133;135;139;141;179;189;192;195;208;213;218;219;220;294;307;326;345;348;351;450;465;478;524;538;551;571;582;626;633
CCLE Hybrid Capture Mutations	CDK13	CDK13_p._ANY_CODING_MUTATION	38;72;85;132;139;141;146;166;183;203;204;213;277;312;325;339;357;384;387;403;437;453;489;527;538;572;582;613;621;654
CCLE Hybrid Capture Mutations	CDK13	CDK13_p.Q544	132;403;654
CCLE Hybrid Capture Mutations	CDK13	CDK13_p.Q544H	132;403;654
CCLE Hybrid Capture Mutations	CDK14	CDK14_p._ANY_CODING_MUTATION	41;78;105;129;132;136;144;183;189;192;216;272;295;317;387;404;420;575;577;605;630;651
CCLE Hybrid Capture Mutations	CDK15	CDK15_p._ANY_CODING_MUTATION	128;203;210;233;352;390;538
CCLE Hybrid Capture Mutations	CDK17	CDK17_p._ANY_CODING_MUTATION	132;141;150;161;203;225;314;411;429;664
CCLE Hybrid Capture Mutations	CDK18	CDK18_p._ANY_CODING_MUTATION	15;30;57;115;130;132;135;144;145;146;179;208;215;389;403;437;442;459;534;584;613;616;627
CCLE Hybrid Capture Mutations	CDK18	CDK18_p.R289	179;437;442
CCLE Hybrid Capture Mutations	CDK18	CDK18_p.R289H	179;437;442
CCLE Hybrid Capture Mutations	CDK19	CDK19_p._ANY_CODING_MUTATION	128;130;131;135;158;195;218;219;325;351;401;421;500;596
CCLE Hybrid Capture Mutations	CDK19	CDK19_p.I294	135;158;325;401;421
CCLE Hybrid Capture Mutations	CDK19	CDK19_p.I294V	135;158;401;421
CCLE Hybrid Capture Mutations	CDK2	CDK2_p._ANY_CODING_MUTATION	60;126;183;218;404;416;440;538;633
CCLE Hybrid Capture Mutations	CDK2	CDK2_p.R245	60;404;633
CCLE Hybrid Capture Mutations	CDK2	CDK2_p.R245Q	60;404;633
CCLE Hybrid Capture Mutations	CDK20	CDK20_p._ANY_CODING_MUTATION	115;133;136;138;193;198;213;219;221;245;340;415;433;444;453;486;575;636
CCLE Hybrid Capture Mutations	CDK20	CDK20_p.R218	133;213;415
CCLE Hybrid Capture Mutations	CDK3	CDK3_p._ANY_CODING_MUTATION	9;218;220;225;271;391;538;570;575;661
CCLE Hybrid Capture Mutations	CDK4	CDK4_p._ANY_CODING_MUTATION	53;210;296;417;500;543;553
CCLE Hybrid Capture Mutations	CDK5	CDK5_p._ANY_CODING_MUTATION	126;146;193;484;644
CCLE Hybrid Capture Mutations	CDK6	CDK6_p._ANY_CODING_MUTATION	135;202;205;260;318;478;577;605
CCLE Hybrid Capture Mutations	CDK7	CDK7_p._ANY_CODING_MUTATION	141;210;339;361;498;499
CCLE Hybrid Capture Mutations	CDK8	CDK8_p._ANY_CODING_MUTATION	128;131;132;135;169;183;189;192;193;195;213;325;412;512;575;613;650
CCLE Hybrid Capture Mutations	CDK9	CDK9_p._ANY_CODING_MUTATION	317;423;500;504
CCLE Hybrid Capture Mutations	CDKL1	CDKL1_p._ANY_CODING_MUTATION	135;193;218;221;254;324;325;336;422;478
CCLE Hybrid Capture Mutations	CDKL2	CDKL2_p._ANY_CODING_MUTATION	71;99;112;128;130;132;135;157;170;192;195;218;221;256;317;406;576;622;645
CCLE Hybrid Capture Mutations	CDKL2	CDKL2_p.V304	112;170;622
CCLE Hybrid Capture Mutations	CDKL2	CDKL2_p.V304A	112;170;622
CCLE Hybrid Capture Mutations	CDKL3	CDKL3_p._ANY_CODING_MUTATION	8;44;86;124;126;129;130;131;132;136;141;195;210;213;218;221;229;266;365;367;392;441;473;500;553;594;636;641;642
CCLE Hybrid Capture Mutations	CDKL3	CDKL3_p.F591	44;130;131;210
CCLE Hybrid Capture Mutations	CDKL3	CDKL3_p.F591fs	44;130;131;210
CCLE Hybrid Capture Mutations	CDKL4	CDKL4_p._ANY_CODING_MUTATION	18;68;102;146;189;199;210;226;305;437;499;541;592;594;598
CCLE Hybrid Capture Mutations	CDKL5	CDKL5_p._ANY_CODING_MUTATION	23;38;126;128;129;130;131;132;133;136;141;144;145;193;196;203;208;213;310;341;361;364;366;401;418;459;499;511;533;628;634
CCLE Hybrid Capture Mutations	CDKN1A	CDKN1A_p._ANY_CODING_MUTATION	82;128;133;136;221;257;575;606;618;645;650;653
CCLE Hybrid Capture Mutations	CDKN1B	CDKN1B_p._ANY_CODING_MUTATION	68;132;137;145;394;440;512
CCLE Hybrid Capture Mutations	CDKN2A	CDKN2A_p._ANY_CODING_MUTATION	139;144;206;291;296;300;308;320;416;425;432;433;524;531;538;555;580;622;624;635;636;638;664
CCLE Hybrid Capture Mutations	CDKN2A	CDKN2A_p.P135	425;538;624;635
CCLE Hybrid Capture Mutations	CDKN2A	CDKN2A_p.P135L	425;538;624;635
CCLE Hybrid Capture Mutations	CDKN2A	CDKN2A_p.R139	206;296;524;580
CCLE Hybrid Capture Mutations	CDKN2B	CDKN2B_p._ANY_CODING_MUTATION	133;185;500;645
CCLE Hybrid Capture Mutations	CDKN2C	CDKN2C_p._ANY_CODING_MUTATION	6;39;93;96;109;126;128;249;420;540;643
CCLE Hybrid Capture Mutations	CDKN2D	CDKN2D_p._ANY_CODING_MUTATION	124;144;626
CCLE Hybrid Capture Mutations	CDX2	CDX2_p._ANY_CODING_MUTATION	6;79;126;129;173;192;226;311;364;404;420;424;444;460;571
CCLE Hybrid Capture Mutations	CDX2	CDX2_p.V306	6;129;192;226;420;571
CCLE Hybrid Capture Mutations	CDX2	CDX2_p.V306fs	129;192;226;420;571
CCLE Hybrid Capture Mutations	CFI	CFI_p._ANY_CODING_MUTATION	4;91;126;133;189;210;218;219;245;279;333;391;437;541
CCLE Hybrid Capture Mutations	CFI	CFI_p.K37	133;189;210
CCLE Hybrid Capture Mutations	CFI	CFI_p.K37fs	133;189;210
CCLE Hybrid Capture Mutations	CHD1	CHD1_p._ANY_CODING_MUTATION	3;4;8;9;10;14;18;24;26;28;29;31;33;35;41;44;48;49;52;53;54;68;69;70;71;74;85;91;99;100;125;126;127;128;131;132;133;137;138;141;143;144;145;150;152;153;163;169;184;189;192;193;196;197;198;199;201;202;204;206;210;212;213;218;220;221;222;224;229;235;240;252;263;264;268;274;275;276;277;282;283;284;285;287;300;303;305;308;310;311;312;313;321;323;325;326;330;332;335;336;338;339;340;343;345;347;348;350;…
CCLE Hybrid Capture Mutations	CHD1	CHD1_p.P1684	3;9;10;14;18;24;26;28;29;31;33;35;41;44;48;49;52;53;54;68;69;70;71;74;85;91;99;100;125;126;127;133;137;143;144;145;150;152;153;163;169;184;192;193;196;197;198;201;202;204;206;210;212;222;224;229;235;240;252;263;264;268;274;276;277;282;283;284;285;287;300;303;305;308;311;313;321;323;326;330;332;335;336;339;340;343;347;348;350;352;358;365;368;370;377;378;381;382;384;394;395;400;404;405;412;419;427;…
CCLE Hybrid Capture Mutations	CHD1	CHD1_p.P1684del	3;9;10;14;18;24;26;28;29;31;33;35;41;44;48;49;52;53;54;68;69;70;71;74;85;91;99;100;125;126;127;133;137;143;144;145;150;152;153;163;169;184;192;193;196;197;198;201;202;204;206;210;212;222;224;229;235;240;252;263;264;268;274;276;277;282;283;284;285;287;300;303;305;308;311;313;321;323;326;330;332;335;336;339;340;343;347;348;350;352;358;365;368;370;377;378;381;382;384;394;395;400;404;405;412;419;427;…
CCLE Hybrid Capture Mutations	CHD1	CHD1_p.P1684del1	3;9;10;14;18;24;26;28;29;31;33;35;41;44;48;49;52;53;54;68;69;70;71;74;85;91;99;100;125;126;127;133;137;143;144;145;150;152;153;163;169;184;192;193;196;197;198;201;202;204;206;210;212;222;224;229;235;240;252;263;264;268;274;276;277;282;283;284;285;287;300;303;305;308;311;313;321;323;326;330;332;335;336;339;340;343;347;348;350;352;358;365;368;370;377;378;381;382;384;394;395;400;404;405;412;419;427;…
CCLE Hybrid Capture Mutations	CHD5	CHD5_p._ANY_CODING_MUTATION	6;34;40;51;79;93;115;126;130;132;133;135;136;141;143;157;189;193;195;203;208;210;218;226;263;269;307;333;335;349;356;364;365;372;374;398;416;437;445;456;460;506;513;526;538;548;576;582;590;638;644
CCLE Hybrid Capture Mutations	CHD8	CHD8_p._ANY_CODING_MUTATION	26;44;57;68;70;124;126;128;129;130;131;132;133;135;136;137;138;141;144;145;189;191;192;193;195;203;210;213;215;218;219;220;226;271;273;287;292;293;298;304;313;330;344;356;364;369;373;392;401;403;416;420;438;439;443;465;500;504;512;537;538;554;571;575;584;592;605;606;613;620;623;632;639
CCLE Hybrid Capture Mutations	CHD8	CHD8_p.D1761	401;439;504;584;632
CCLE Hybrid Capture Mutations	CHD8	CHD8_p.D1761G	401;439;504;584;632
CCLE Hybrid Capture Mutations	CHD8	CHD8_p.G1178	57;369;438;620
CCLE Hybrid Capture Mutations	CHD8	CHD8_p.G1178splice	57;369;438;620
CCLE Hybrid Capture Mutations	CHD8	CHD8_p.N2092	133;136;145;210;213;220
CCLE Hybrid Capture Mutations	CHD8	CHD8_p.N2092fs	133;136;145;210;213;220
CCLE Hybrid Capture Mutations	CHD9	CHD9_p._ANY_CODING_MUTATION	9;14;57;69;74;84;101;126;128;132;135;136;137;141;143;145;146;147;149;150;158;166;189;193;196;198;199;202;203;210;213;218;219;220;221;224;226;239;260;272;297;301;310;320;329;332;339;343;357;360;364;365;366;367;370;384;410;419;432;449;451;453;455;467;498;499;500;531;541;554;557;583;584;596;600;604;606;608;613;618;627;629;630;639;651;652;655
CCLE Hybrid Capture Mutations	CHD9	CHD9_p.H758	189;198;213;220
CCLE Hybrid Capture Mutations	CHD9	CHD9_p.H758fs	189;198;213;220
CCLE Hybrid Capture Mutations	CHD9	CHD9_p.K2429	135;143;146;500
CCLE Hybrid Capture Mutations	CHD9	CHD9_p.K2429fs	135;143;146;500
CCLE Hybrid Capture Mutations	CHD9	CHD9_p.S2164	9;57;74;84;149;224;297;320;329;339;357;364;367;370;419;432;449;453;455;467;499;554;557;583;606;618;627;629;630;651;655
CCLE Hybrid Capture Mutations	CHD9	CHD9_p.S2164indel2>S	9;57;74;84;149;224;297;320;329;339;357;364;367;370;419;432;449;453;455;467;499;554;557;583;606;618;627;629;630;651;655
CCLE Hybrid Capture Mutations	CHEK1	CHEK1_p._ANY_CODING_MUTATION	44;128;132;141;198;213;403;420;473;542;581
CCLE Hybrid Capture Mutations	CHEK1	CHEK1_p.E223	128;198;420
CCLE Hybrid Capture Mutations	CHEK1	CHEK1_p.E223fs	128;198;420
CCLE Hybrid Capture Mutations	CHEK2	CHEK2_p._ANY_CODING_MUTATION	14;126;129;132;141;183;189;192;193;198;203;215;218;221;330;407;443;500;508;543;574;575;580;611;653
CCLE Hybrid Capture Mutations	CHIC2	CHIC2_p._ANY_CODING_MUTATION	195;213;218;356;445
CCLE Hybrid Capture Mutations	CHL1	CHL1_p._ANY_CODING_MUTATION	4;40;46;84;86;102;114;116;126;128;130;132;135;139;141;144;145;152;195;199;205;213;218;233;298;320;332;348;364;366;369;380;408;437;445;464;498;513;531;551;559;564;575;584;613;621;626;654;663
CCLE Hybrid Capture Mutations	CHN1	CHN1_p._ANY_CODING_MUTATION	79;126;128;136;220;221;285;351;357;412;513;555;583;595;620;644;647
CCLE Hybrid Capture Mutations	CHRNA3	CHRNA3_p._ANY_CODING_MUTATION	90;132;141;220;339;372;512
CCLE Hybrid Capture Mutations	CHRNA5	CHRNA5_p._ANY_CODING_MUTATION	69;115;126;132;135;213;215;237;438;536;631
CCLE Hybrid Capture Mutations	CHRNB4	CHRNB4_p._ANY_CODING_MUTATION	19;124;135;206;216;218;253;420;425;447;540
CCLE Hybrid Capture Mutations	CHUK	CHUK_p._ANY_CODING_MUTATION	132;183;196;209;213;216;218;219;221;227;252;320;420;444;462;473;481;500;618;623;641;642
CCLE Hybrid Capture Mutations	CIC	CIC_p._ANY_CODING_MUTATION	40;51;99;115;124;128;129;131;132;135;136;144;145;146;161;183;189;193;199;202;213;215;219;220;230;239;249;268;313;344;352;382;404;437;478;541;575;576;580;594
CCLE Hybrid Capture Mutations	CIC	CIC_p.A1014	136;213;478
CCLE Hybrid Capture Mutations	CIC	CIC_p.A1014V	136;213;478
CCLE Hybrid Capture Mutations	CIC	CIC_p.P1146	239;437;594
CCLE Hybrid Capture Mutations	CIC	CIC_p.P1146L	239;437;594
CCLE Hybrid Capture Mutations	CIC	CIC_p.Y249	124;202;230
CCLE Hybrid Capture Mutations	CIITA	CIITA_p._ANY_CODING_MUTATION	9;26;70;126;128;135;136;146;151;183;213;219;226;230;268;316;364;376;500;512;554;577;609;641;642;654
CCLE Hybrid Capture Mutations	CIT	CIT_p._ANY_CODING_MUTATION	4;53;91;124;126;128;130;131;132;133;135;136;137;139;141;145;146;163;164;179;182;183;189;193;195;198;199;213;218;221;225;226;244;259;266;268;273;303;321;332;342;351;361;364;365;368;376;380;392;394;417;426;427;465;474;477;484;488;498;506;512;513;535;547;562;575;580;589;592;594;598;613;616;619;638;657;663
CCLE Hybrid Capture Mutations	CIT	CIT_p.G429	392;562;594;638
CCLE Hybrid Capture Mutations	CIT	CIT_p.G429S	392;562;594;638
CCLE Hybrid Capture Mutations	CIT	CIT_p.V903	53;163;303;351;368;417;426;506;657
CCLE Hybrid Capture Mutations	CIT	CIT_p.V903splice	53;163;303;351;368;417;426;506;657
CCLE Hybrid Capture Mutations	CLK1	CLK1_p._ANY_CODING_MUTATION	53;129;132;135;141;189;356;477;569;613;643
CCLE Hybrid Capture Mutations	CLK2	CLK2_p._ANY_CODING_MUTATION	126;135;193;198;210;219;221;311;325;340;412;416;490;562;578;592;606;645
CCLE Hybrid Capture Mutations	CLK3	CLK3_p._ANY_CODING_MUTATION	44;183;218;284;407;416;584;592
CCLE Hybrid Capture Mutations	CLK4	CLK4_p._ANY_CODING_MUTATION	34;129;130;131;132;141;173;193;208;213;218;285;325;380;499;538;584;653
CCLE Hybrid Capture Mutations	CLK4	CLK4_p.R405	130;131;325
CCLE Hybrid Capture Mutations	CLP1	CLP1_p._ANY_CODING_MUTATION	96;105;128;139;195;203;213;254;439;606;617
CCLE Hybrid Capture Mutations	CLPTM1	CLPTM1_p._ANY_CODING_MUTATION	137;144;213;218;220;235;358;491;500;535;605;635
CCLE Hybrid Capture Mutations	CLPTM1L	CLPTM1L_p._ANY_CODING_MUTATION	15;49;193;202;254;445;499;583;632
CCLE Hybrid Capture Mutations	CLTC	CLTC_p._ANY_CODING_MUTATION	41;79;100;125;126;128;129;130;132;133;135;139;141;144;183;193;195;197;199;202;208;213;218;220;227;297;304;311;327;381;390;435;437;446;477;499;571;597;636;644;658
CCLE Hybrid Capture Mutations	CNBP	CNBP_p._ANY_CODING_MUTATION	213;218;315;399;575
CCLE Hybrid Capture Mutations	CNTN1	CNTN1_p._ANY_CODING_MUTATION	116;124;127;129;132;135;136;141;142;161;163;178;193;198;203;215;218;219;248;255;263;274;305;312;317;320;326;332;342;348;350;351;377;380;390;397;407;420;437;453;483;499;500;531;534;592
CCLE Hybrid Capture Mutations	CNTN5	CNTN5_p._ANY_CODING_MUTATION	54;58;68;126;128;132;135;136;142;143;144;146;174;180;185;189;192;195;198;203;213;215;218;222;227;239;241;265;301;305;307;312;317;326;329;338;340;344;350;351;356;364;372;380;383;387;394;396;397;400;416;464;468;471;495;499;503;509;513;531;535;537;539;549;551;557;559;562;584;598;616;655
CCLE Hybrid Capture Mutations	CNTN5	CNTN5_p.A871	180;312;329;559
CCLE Hybrid Capture Mutations	CNTN5	CNTN5_p.A871P	180;312;329;559
CCLE Hybrid Capture Mutations	CNTN5	CNTN5_p.L1000	146;400;509
CCLE Hybrid Capture Mutations	CNTN5	CNTN5_p.L1000S	146;400;509
CCLE Hybrid Capture Mutations	CNTN6	CNTN6_p._ANY_CODING_MUTATION	21;23;48;50;98;126;128;129;131;132;141;144;183;189;197;198;201;203;213;220;232;258;285;294;301;304;342;348;351;357;374;400;413;417;420;449;479;509;535;538;542;559;562;576;587;598;609;628
CCLE Hybrid Capture Mutations	CNTN6	CNTN6_p.K416	131;183;220
CCLE Hybrid Capture Mutations	CNTN6	CNTN6_p.K416fs	131;183;220
CCLE Hybrid Capture Mutations	CNTN6	CNTN6_p.S278	400;509;559
CCLE Hybrid Capture Mutations	CNTRL	CNTRL_p._ANY_CODING_MUTATION	17;30;38;44;48;68;72;86;126;128;129;131;132;133;135;139;141;157;173;177;180;183;192;193;195;199;202;206;210;213;215;218;230;235;254;293;300;301;308;311;329;358;359;367;411;424;479;490;499;500;562;567;575;578;587;652
CCLE Hybrid Capture Mutations	CNTRL	CNTRL_p.E1800	44;131;202
CCLE Hybrid Capture Mutations	CNTRL	CNTRL_p.E1800fs	44;131;202
CCLE Hybrid Capture Mutations	CNTRL	CNTRL_p.L1321	68;139;180
CCLE Hybrid Capture Mutations	CNTRL	CNTRL_p.L1321splice	68;139;180
CCLE Hybrid Capture Mutations	COL14A1	COL14A1_p._ANY_CODING_MUTATION	70;99;110;128;132;135;138;141;144;145;150;178;183;185;189;193;203;205;210;213;218;220;221;226;239;255;264;279;294;308;312;313;332;334;342;357;359;364;382;403;405;498;499;531;537;541;544;554;567;598;618;636;644;652;664
CCLE Hybrid Capture Mutations	COL18A1	COL18A1_p._ANY_CODING_MUTATION	12;38;128;130;135;138;146;147;157;193;203;213;219;226;314;320;334;340;344;349;370;395;397;426;449;464;469;498;500;536;554;598;619;645;651;658;662
CCLE Hybrid Capture Mutations	COL18A1	COL18A1_p.G1406	349;619;645
CCLE Hybrid Capture Mutations	COL18A1	COL18A1_p.G1406del	349;619;645
CCLE Hybrid Capture Mutations	COL18A1	COL18A1_p.G1406del3	349;619;645
CCLE Hybrid Capture Mutations	COL1A1	COL1A1_p._ANY_CODING_MUTATION	39;56;68;126;128;135;137;144;145;162;192;195;198;213;226;257;295;317;336;339;367;373;379;388;389;394;407;439;535;545;578;585;598
CCLE Hybrid Capture Mutations	COL3A1	COL3A1_p._ANY_CODING_MUTATION	12;21;41;68;84;126;128;132;133;135;137;141;144;185;192;193;199;218;219;221;241;264;269;273;276;282;284;294;304;307;310;318;325;329;330;331;342;344;348;350;353;364;367;368;384;387;391;403;412;430;460;487;490;499;500;510;513;536;538;553;572;584;590;598;600;621;639
CCLE Hybrid Capture Mutations	COL4A3BP	COL4A3BP_p._ANY_CODING_MUTATION	141;144;146;189;213;220;317;371;538
CCLE Hybrid Capture Mutations	COPS5	COPS5_p._ANY_CODING_MUTATION	53;70;144;189;218;344;500;512;584
CCLE Hybrid Capture Mutations	COX6C	COX6C_p._ANY_CODING_MUTATION	197;202;221
CCLE Hybrid Capture Mutations	CPAMD8	CPAMD8_p._ANY_CODING_MUTATION	54;78;89;110;127;130;131;132;135;136;137;141;145;150;189;193;195;203;210;213;218;226;249;268;278;283;286;348;361;392;443;466;513;519;529;530;537;540;545;577;584;601;605
CCLE Hybrid Capture Mutations	CPAMD8	CPAMD8_p.G1051	135;189;210;268
CCLE Hybrid Capture Mutations	CPAMD8	CPAMD8_p.G1051fs	135;189;210;268
CCLE Hybrid Capture Mutations	CPNE5	CPNE5_p._ANY_CODING_MUTATION	116;126;130;131;144;147;192;213;215;226;357;378;398;444;513;524;576;596;644
CCLE Hybrid Capture Mutations	CPNE5	CPNE5_p.V236	147;215;398
CCLE Hybrid Capture Mutations	CPNE5	CPNE5_p.V236M	147;215;398
CCLE Hybrid Capture Mutations	CREB1	CREB1_p._ANY_CODING_MUTATION	40;70;157;199;222
CCLE Hybrid Capture Mutations	CREB3L2	CREB3L2_p._ANY_CODING_MUTATION	1;2;4;6;8;9;10;15;18;29;31;33;35;37;39;40;41;42;46;47;48;49;53;56;57;58;60;68;71;72;76;79;87;89;92;95;96;100;101;102;103;108;110;111;112;114;121;127;128;129;130;132;133;135;138;142;144;145;146;147;148;149;156;157;158;161;162;164;166;168;171;172;178;179;180;181;185;186;191;196;199;200;201;203;205;207;209;210;215;216;218;220;221;225;226;227;237;238;240;244;246;247;248;249;253;255;259;265;266;267;26…
CCLE Hybrid Capture Mutations	CREB3L2	CREB3L2_p.T100	1;2;4;6;8;9;10;15;18;29;31;33;35;37;39;40;41;42;46;47;48;49;53;56;57;58;60;68;71;72;76;79;87;89;92;95;96;100;101;102;103;108;110;111;112;114;121;127;128;129;130;132;133;135;142;144;145;146;147;148;149;156;157;158;161;162;164;166;168;171;172;178;179;180;181;185;186;191;196;199;200;201;203;205;207;209;210;215;216;218;220;221;225;226;227;237;238;240;244;246;247;248;249;253;255;259;265;266;267;269;27…
CCLE Hybrid Capture Mutations	CREB3L2	CREB3L2_p.T100del	1;2;4;6;8;9;10;15;18;29;31;33;35;37;39;40;41;42;46;47;48;49;53;56;57;58;60;68;71;72;76;79;87;89;92;95;96;100;101;102;103;108;110;111;112;114;121;127;128;129;130;132;133;135;142;144;145;146;147;148;149;156;157;158;161;162;164;166;168;171;172;178;179;180;181;185;186;191;196;199;200;201;203;205;207;209;210;215;216;218;220;221;225;226;227;237;238;240;244;246;247;248;249;253;255;259;265;266;267;269;27…
CCLE Hybrid Capture Mutations	CREB3L2	CREB3L2_p.T100del1	1;2;4;6;8;9;10;15;18;29;31;33;35;37;39;40;41;42;46;47;48;49;53;56;57;58;60;68;71;72;76;79;87;89;92;95;96;100;101;102;103;108;110;111;112;114;121;127;128;129;130;132;133;135;142;144;145;146;147;148;149;156;157;158;161;162;164;166;168;171;172;178;179;180;181;185;186;191;196;199;200;201;203;205;207;209;210;215;216;218;220;221;225;226;227;237;238;240;244;246;247;248;249;253;255;259;265;266;267;269;27…
CCLE Hybrid Capture Mutations	CREBBP	CREBBP_p._ANY_CODING_MUTATION	21;49;89;114;121;124;126;127;128;131;133;135;136;137;141;144;146;150;157;183;185;189;193;195;198;199;203;206;210;213;218;219;221;225;226;236;268;271;272;282;317;320;332;338;339;360;364;398;399;406;416;420;430;435;498;500;513;527;541;559;603;616;618;622;627;628;644;664
CCLE Hybrid Capture Mutations	CREBBP	CREBBP_p.I1084	124;185;203;226
CCLE Hybrid Capture Mutations	CREBBP	CREBBP_p.I1084fs	124;203;226
CCLE Hybrid Capture Mutations	CRKL	CRKL_p._ANY_CODING_MUTATION	218;221;350
CCLE Hybrid Capture Mutations	CRP	CRP_p._ANY_CODING_MUTATION	189;259;275;305;316;456
CCLE Hybrid Capture Mutations	CRTC1	CRTC1_p._ANY_CODING_MUTATION	126;129;131;135;136;166;183;189;193;199;221;398;498;500;571;584
CCLE Hybrid Capture Mutations	CRTC1	CRTC1_p.S585	131;136;183;189;199;498;500;571;584
CCLE Hybrid Capture Mutations	CRTC1	CRTC1_p.S585fs	131;136;183;189;199;498;500;571;584
CCLE Hybrid Capture Mutations	CSF1R	CSF1R_p._ANY_CODING_MUTATION	23;42;49;69;135;137;144;195;213;219;247;312;319;350;351;368;386;403;533;569;586
CCLE Hybrid Capture Mutations	CSF3	CSF3_p._ANY_CODING_MUTATION	129;199;203;220;301;498
CCLE Hybrid Capture Mutations	CSF3	CSF3_p.T31	129;199;498
CCLE Hybrid Capture Mutations	CSF3	CSF3_p.T31fs	129;199;498
CCLE Hybrid Capture Mutations	CSF3R	CSF3R_p._ANY_CODING_MUTATION	132;135;141;145;189;193;205;213;239;293;364;371;393;423;437;478;482;500;503;510;601
CCLE Hybrid Capture Mutations	CSK	CSK_p._ANY_CODING_MUTATION	129;146;193;213;248;332;611
CCLE Hybrid Capture Mutations	CSMD3	CSMD3_p._ANY_CODING_MUTATION	17;23;30;39;40;43;52;53;60;68;69;80;100;117;126;127;128;129;132;134;135;136;138;139;141;144;147;151;153;157;162;173;189;193;195;198;203;210;213;215;216;218;219;220;221;225;226;235;255;258;260;263;264;266;268;272;273;275;276;278;282;283;285;291;292;293;296;301;305;306;307;308;310;312;313;317;318;319;320;321;323;325;326;327;330;333;334;335;336;338;340;342;343;344;348;349;350;351;352;356;357;360;364…
CCLE Hybrid Capture Mutations	CSMD3	CSMD3_p.F3640	129;135;437;498;575
CCLE Hybrid Capture Mutations	CSMD3	CSMD3_p.F3640fs	129;135;437;498;575
CCLE Hybrid Capture Mutations	CSMD3	CSMD3_p.K3381	139;193;198;611
CCLE Hybrid Capture Mutations	CSMD3	CSMD3_p.K3381fs	139;198;611
CCLE Hybrid Capture Mutations	CSNK1A1	CSNK1A1_p._ANY_CODING_MUTATION	16;126;131;141;156;202;210;300;360;513;554;613
CCLE Hybrid Capture Mutations	CSNK1A1L	CSNK1A1L_p._ANY_CODING_MUTATION	16;19;126;128;129;132;138;141;146;162;172;189;197;210;225;313;388;389;421;451;465;499;513;575
CCLE Hybrid Capture Mutations	CSNK1A1L	CSNK1A1L_p.K230	126;129;189;575
CCLE Hybrid Capture Mutations	CSNK1A1L	CSNK1A1L_p.K230fs	126;129;189;575
CCLE Hybrid Capture Mutations	CSNK1D	CSNK1D_p._ANY_CODING_MUTATION	134;136;157;183;193;213;299;510;577;619
CCLE Hybrid Capture Mutations	CSNK1E	CSNK1E_p._ANY_CODING_MUTATION	57;193;202;307;341;416;420;571;577
CCLE Hybrid Capture Mutations	CSNK1G1	CSNK1G1_p._ANY_CODING_MUTATION	71;137;189;218;311;330;492;538
CCLE Hybrid Capture Mutations	CSNK1G2	CSNK1G2_p._ANY_CODING_MUTATION	96;128;193;213;228;500;571
CCLE Hybrid Capture Mutations	CSNK1G3	CSNK1G3_p._ANY_CODING_MUTATION	102;126;132;133;135;136;141;144;198;199;203;213;218;227;268;275;395;417;420;423;500;502
CCLE Hybrid Capture Mutations	CSNK1G3	CSNK1G3_p.G46	133;136;144;198;420
CCLE Hybrid Capture Mutations	CSNK1G3	CSNK1G3_p.G46fs	133;136;144;198;420
CCLE Hybrid Capture Mutations	CSNK2A1	CSNK2A1_p._ANY_CODING_MUTATION	102;148;195;213;218;254;271;311;324;358;359;610
CCLE Hybrid Capture Mutations	CSNK2A2	CSNK2A2_p._ANY_CODING_MUTATION	126;135;141;195;221;391;403;553
CCLE Hybrid Capture Mutations	CSPG4	CSPG4_p._ANY_CODING_MUTATION	60;81;98;100;101;126;132;134;135;136;141;146;148;173;177;189;193;198;199;200;213;219;221;230;241;244;273;325;351;374;383;449;498;500;538;575;637;653
CCLE Hybrid Capture Mutations	CSPP1	CSPP1_p._ANY_CODING_MUTATION	6;30;44;48;53;132;144;146;181;189;201;202;203;210;213;218;221;310;340;361;373;437;442;450;494;500;582;611;635;644
CCLE Hybrid Capture Mutations	CSPP1	CSPP1_p.P549	437;442;611;635
CCLE Hybrid Capture Mutations	CSPP1	CSPP1_p.P549L	437;442;611;635
CCLE Hybrid Capture Mutations	CTBP1	CTBP1_p._ANY_CODING_MUTATION	128;129;136;144;150;203;213;506;620;634;639
CCLE Hybrid Capture Mutations	CTBP2	CTBP2_p._ANY_CODING_MUTATION	7;9;12;14;16;26;27;32;36;38;39;41;45;48;50;52;53;63;64;70;71;72;73;77;78;79;81;82;86;89;90;91;92;93;105;108;109;110;111;112;113;115;116;117;124;125;127;128;130;131;132;134;135;136;141;144;145;150;152;162;164;173;174;175;178;189;192;193;197;199;203;204;210;213;215;219;220;221;222;223;224;229;232;233;245;249;250;251;259;260;263;265;273;280;282;297;307;345;362;366;373;384;387;394;399;406;417;420;421…
CCLE Hybrid Capture Mutations	CTBP2	CTBP2_p.K974	7;9;14;16;27;32;36;39;41;45;48;50;52;63;64;72;73;77;78;79;81;82;86;90;91;92;93;105;108;109;110;111;112;113;115;116;117;125;131;134;136;150;152;162;164;173;174;175;178;193;197;204;215;219;220;221;222;224;229;232;233;245;249;250;251;259;260;263;265;273;280;282;297;307;345;362;366;373;384;387;399;406;421;424;427;437;438;441;446;447;460;464;489;494;498;499;501;505;506;509;511;512;515;520;522;523;525;…
CCLE Hybrid Capture Mutations	CTBP2	CTBP2_p.K974fs	7;9;14;16;27;32;36;39;41;45;48;50;52;63;64;72;73;77;78;79;81;82;86;90;91;92;93;105;108;109;110;111;112;113;115;116;117;125;131;134;136;150;152;162;164;173;174;175;178;193;197;204;215;219;220;221;222;224;229;232;233;245;249;250;251;259;260;263;265;273;280;282;297;307;345;362;366;373;384;387;399;406;421;424;427;437;438;441;446;447;460;464;489;494;498;499;501;505;506;509;511;512;515;520;522;523;525;…
CCLE Hybrid Capture Mutations	CTBP2	CTBP2_p.Q175	71;433;531
CCLE Hybrid Capture Mutations	CTBP2	CTBP2_p.Q175fs	71;433;531
CCLE Hybrid Capture Mutations	CTDSPL	CTDSPL_p._ANY_CODING_MUTATION	136;145;149;150;196;221;313;388;454;626
CCLE Hybrid Capture Mutations	CTLA4	CTLA4_p._ANY_CODING_MUTATION	128;133;145;193;195;203;386;598
CCLE Hybrid Capture Mutations	CTNNA2	CTNNA2_p._ANY_CODING_MUTATION	7;40;102;126;132;136;141;145;158;189;193;195;197;208;213;216;218;245;249;263;265;269;305;310;325;326;332;333;334;338;340;351;365;367;368;380;383;393;394;400;409;416;466;478;499;516;538;575;584;591;598;613;616;639;644
CCLE Hybrid Capture Mutations	CTNNB1	CTNNB1_p._ANY_CODING_MUTATION	21;37;128;130;133;135;136;139;146;150;182;183;189;192;197;202;213;215;218;226;235;246;276;300;301;356;381;435;449;499;512;524;551;576;585;593;598;622;624;644
CCLE Hybrid Capture Mutations	CTNNB1	CTNNB1_p.D32	133;136;585
CCLE Hybrid Capture Mutations	CTNNB1	CTNNB1_p.G34	235;576;598
CCLE Hybrid Capture Mutations	CTNNB1	CTNNB1_p.S33	226;301;381
CCLE Hybrid Capture Mutations	CTNNB1	CTNNB1_p.S37	128;139;146;246
CCLE Hybrid Capture Mutations	CTNNB1	CTNNB1_p.S45	21;192;202;276;512;593
CCLE Hybrid Capture Mutations	CTNNB1	CTNNB1_p.T41	183;215;300
CCLE Hybrid Capture Mutations	CTNNB1	CTNNB1_p.T41A	183;215;300
CCLE Hybrid Capture Mutations	CTSL1	CTSL1_p._ANY_CODING_MUTATION	130;131;132;136;141;189;195;218;220;226;500
CCLE Hybrid Capture Mutations	CTSL2	CTSL2_p._ANY_CODING_MUTATION	27;132;195;213;219;254;259;274;364
CCLE Hybrid Capture Mutations	CTSS	CTSS_p._ANY_CODING_MUTATION	128;143;211;213;220;535;583;664
CCLE Hybrid Capture Mutations	CTTN	CTTN_p._ANY_CODING_MUTATION	4;18;23;126;132;133;135;197;240;293;331;380;538;585
CCLE Hybrid Capture Mutations	CTTN	CTTN_p.S368	4;23;293
CCLE Hybrid Capture Mutations	CTTN	CTTN_p.S368L	4;23;293
CCLE Hybrid Capture Mutations	CUBN	CUBN_p._ANY_CODING_MUTATION	5;8;17;26;45;48;50;54;68;113;115;121;124;126;128;130;131;132;133;135;137;138;144;161;170;171;173;183;193;195;199;208;213;215;216;218;219;221;225;226;228;229;232;235;251;266;268;275;282;295;296;305;307;310;313;325;329;333;335;340;348;349;351;364;366;379;386;392;397;420;425;437;450;454;461;482;484;490;498;538;558;559;575;576;586;592;605;613;621;656;661;664
CCLE Hybrid Capture Mutations	CUBN	CUBN_p.R651	5;132;138;208;215;437;482;621
CCLE Hybrid Capture Mutations	CUBN	CUBN_p.R651G	5;138;208;215;437;482;621
CCLE Hybrid Capture Mutations	CXCL12	CXCL12_p._ANY_CODING_MUTATION	16;150;255;263;351
CCLE Hybrid Capture Mutations	CXCL9	CXCL9_p._ANY_CODING_MUTATION	75;133;137;189;218;331;469
CCLE Hybrid Capture Mutations	CXCR1	CXCR1_p._ANY_CODING_MUTATION	82;128;203;515;538
CCLE Hybrid Capture Mutations	CXCR2	CXCR2_p._ANY_CODING_MUTATION	138;215;226;306;312;315;325;374;411;473;484;501;506;604
CCLE Hybrid Capture Mutations	CXCR4	CXCR4_p._ANY_CODING_MUTATION	126;192;200;210;213;215;305;322;361;392;425;621
CCLE Hybrid Capture Mutations	CXCR7	CXCR7_p._ANY_CODING_MUTATION	141;183;218;294;313;350;358;535
CCLE Hybrid Capture Mutations	CYB5R4	CYB5R4_p._ANY_CODING_MUTATION	36;53;68;122;129;133;135;144;189;193;196;198;199;213;219;273;359;404;498;504;551;584;622;639
CCLE Hybrid Capture Mutations	CYB5R4	CYB5R4_p.Q245	129;133;135;144;189;193;198;219;498;584
CCLE Hybrid Capture Mutations	CYB5R4	CYB5R4_p.Q245fs	129;133;135;144;189;193;198;219;498;584
CCLE Hybrid Capture Mutations	CYFIP1	CYFIP1_p._ANY_CODING_MUTATION	33;39;56;117;128;132;139;147;189;193;203;210;215;219;220;254;319;327;373;437;469;520;538;555;578;599;604;608;618;637;639
CCLE Hybrid Capture Mutations	CYLD	CYLD_p._ANY_CODING_MUTATION	84;128;135;146;156;193;213;218;220;221;233;283;305;389;493;535;584
CCLE Hybrid Capture Mutations	CYP17A1	CYP17A1_p._ANY_CODING_MUTATION	126;129;141;146;213;226;255;344;498
CCLE Hybrid Capture Mutations	CYP19A1	CYP19A1_p._ANY_CODING_MUTATION	12;132;203;213;229;308;380;397;576
CCLE Hybrid Capture Mutations	CYP1A2	CYP1A2_p._ANY_CODING_MUTATION	2;5;112;128;130;131;132;133;135;147;195;213;215;221;239;486;488;541;596;636
CCLE Hybrid Capture Mutations	CYP1A2	CYP1A2_p.T438	2;5;112;133;221;239;488;636
CCLE Hybrid Capture Mutations	CYP1A2	CYP1A2_p.T438I	2;5;112;133;221;239;488;636
CCLE Hybrid Capture Mutations	CYP1B1	CYP1B1_p._ANY_CODING_MUTATION	34;53;126;130;136;145;193;195;213;226;275;351;395;405;416;538;579
CCLE Hybrid Capture Mutations	CYP24A1	CYP24A1_p._ANY_CODING_MUTATION	15;42;96;132;135;137;141;144;168;183;198;221;312;344;356;375;437;468;507;559;571;589;610;618;635
CCLE Hybrid Capture Mutations	CYP27B1	CYP27B1_p._ANY_CODING_MUTATION	95;102;128;131;151;152;192;193;195;248;260;268;353;358;455;483;533;538;576;577
CCLE Hybrid Capture Mutations	CYP2B6	CYP2B6_p._ANY_CODING_MUTATION	60;79;102;126;128;132;145;146;157;196;213;215;281;406;449;479;491;513;521;533;632
CCLE Hybrid Capture Mutations	CYP2B6	CYP2B6_p.P167	79;196;406;479;521;632
CCLE Hybrid Capture Mutations	CYP2B6	CYP2B6_p.P167A	79;196;406;479;521;632
CCLE Hybrid Capture Mutations	CYP3A4	CYP3A4_p._ANY_CODING_MUTATION	54;98;128;132;150;185;210;219;292;329;348;420;425;471;525;531;594;621
CCLE Hybrid Capture Mutations	CYSLTR2	CYSLTR2_p._ANY_CODING_MUTATION	98;136;141;213;259;372;403;577
CCLE Hybrid Capture Mutations	DAB1	DAB1_p._ANY_CODING_MUTATION	68;131;132;133;141;144;161;192;213;215;218;251;266;268;275;287;375;491;498;510;541;554;639;648
CCLE Hybrid Capture Mutations	DAB1	DAB1_p.R56	133;266;639
CCLE Hybrid Capture Mutations	DACH1	DACH1_p._ANY_CODING_MUTATION	51;56;126;129;132;135;136;189;192;193;210;213;220;230;269;297;305;307;313;315;329;344;349;350;367;369;371;388;405;478;538;542;586;597;628;663
CCLE Hybrid Capture Mutations	DACH1	DACH1_p.N359	126;132;135;586
CCLE Hybrid Capture Mutations	DACH1	DACH1_p.N359D	126;132;135;586
CCLE Hybrid Capture Mutations	DAPK1	DAPK1_p._ANY_CODING_MUTATION	57;60;85;113;122;126;128;130;131;132;135;136;139;141;144;157;169;177;186;187;189;193;197;198;199;202;203;213;219;226;266;296;310;329;345;351;364;380;387;399;408;449;474;498;549;585;597;613
CCLE Hybrid Capture Mutations	DAPK1	DAPK1_p.M1272	139;144;203;226;498
CCLE Hybrid Capture Mutations	DAPK1	DAPK1_p.M1272fs	139;144;203;226;498
CCLE Hybrid Capture Mutations	DAPK2	DAPK2_p._ANY_CODING_MUTATION	3;35;109;116;180;192;213;363;380;416;501;575
CCLE Hybrid Capture Mutations	DAPK3	DAPK3_p._ANY_CODING_MUTATION	213;350;498;519;622
CCLE Hybrid Capture Mutations	DAXX	DAXX_p._ANY_CODING_MUTATION	4;42;68;76;127;128;132;134;135;141;144;263;272;317;340;423;437;468;492;531;538;583;589;592
CCLE Hybrid Capture Mutations	DAXX	DAXX_p.E469	4;423;437;589
CCLE Hybrid Capture Mutations	DAXX	DAXX_p.E469del	4;423;437;589
CCLE Hybrid Capture Mutations	DAXX	DAXX_p.E469del1	4;423;437;589
CCLE Hybrid Capture Mutations	DBF4	DBF4_p._ANY_CODING_MUTATION	38;45;46;53;61;72;102;124;128;132;141;146;183;198;213;266;293;322;364;452;462;533;594;662
CCLE Hybrid Capture Mutations	DBF4	DBF4_p.P555	38;46;72
CCLE Hybrid Capture Mutations	DBF4	DBF4_p.P555del	38;46;72
CCLE Hybrid Capture Mutations	DBF4	DBF4_p.P555del1	38;46;72
CCLE Hybrid Capture Mutations	DBN1	DBN1_p._ANY_CODING_MUTATION	40;49;126;135;136;144;153;185;193;198;213;221;255;291;358;386;449;500;606
CCLE Hybrid Capture Mutations	DCLK1	DCLK1_p._ANY_CODING_MUTATION	129;136;193;195;201;202;213;218;229;239;255;267;283;305;335;351;377;389;441;510;538;575;576;584;638
CCLE Hybrid Capture Mutations	DCLK2	DCLK2_p._ANY_CODING_MUTATION	70;74;126;129;132;141;144;157;189;195;203;213;218;239;305;312;325;364;512;531;538;589;596;638
CCLE Hybrid Capture Mutations	DCLK3	DCLK3_p._ANY_CODING_MUTATION	124;129;132;136;139;141;185;189;215;218;253;274;275;296;315;331;382;500;569;657
CCLE Hybrid Capture Mutations	DDB2	DDB2_p._ANY_CODING_MUTATION	129;157;199;278;416;538;644
CCLE Hybrid Capture Mutations	DDR1	DDR1_p._ANY_CODING_MUTATION	115;128;130;138;158;168;172;185;193;195;199;210;213;218;226;305;321;386;437;450;537;557;592;600;613
CCLE Hybrid Capture Mutations	DDR2	DDR2_p._ANY_CODING_MUTATION	71;115;128;141;144;146;192;193;202;218;266;269;283;300;301;348;350;351;357;368;403;437;517;585;613
CCLE Hybrid Capture Mutations	DDX1	DDX1_p._ANY_CODING_MUTATION	132;135;136;144;145;189;291;314;317;358
CCLE Hybrid Capture Mutations	DDX10	DDX10_p._ANY_CODING_MUTATION	33;63;141;144;145;148;162;174;182;193;195;202;203;213;218;250;283;380;392;417;425;575;616;621
CCLE Hybrid Capture Mutations	DDX10	DDX10_p.X788	33;250;283;425;621
CCLE Hybrid Capture Mutations	DDX10	DDX10_p.X788ins	33;250;283;425;621
CCLE Hybrid Capture Mutations	DDX10	DDX10_p.X788insDD	33;250;425;621
CCLE Hybrid Capture Mutations	DDX6	DDX6_p._ANY_CODING_MUTATION	60;132;135;136;138;144;189;193;202;274;311;335;338;498;550;552;569;613;638
CCLE Hybrid Capture Mutations	DDX6	DDX6_p.N289	60;136;144;202;274;498;550;552;613
CCLE Hybrid Capture Mutations	DDX6	DDX6_p.N289splice	136;144;202;274;498;550;552;613
CCLE Hybrid Capture Mutations	DEK	DEK_p._ANY_CODING_MUTATION	132;153;189;193;365;410;512;551
CCLE Hybrid Capture Mutations	DFFA	DFFA_p._ANY_CODING_MUTATION	51;202;281;351;388;584;590;612
CCLE Hybrid Capture Mutations	DFFB	DFFB_p._ANY_CODING_MUTATION	145;146;189;195;239;256;380;621;644
CCLE Hybrid Capture Mutations	DFNA5	DFNA5_p._ANY_CODING_MUTATION	30;75;134;141;173;195;208;213;218;250;316;369;373;479;500;517;575
CCLE Hybrid Capture Mutations	DFNA5	DFNA5_p.N152	173;208;373
CCLE Hybrid Capture Mutations	DFNA5	DFNA5_p.N152K	173;208;373
CCLE Hybrid Capture Mutations	DGKB	DGKB_p._ANY_CODING_MUTATION	115;128;132;133;141;189;193;195;218;221;226;251;266;268;288;305;310;325;332;333;334;338;342;345;359;361;367;373;443;483;538;547;562;584;592;629;633;650;657
CCLE Hybrid Capture Mutations	DGKG	DGKG_p._ANY_CODING_MUTATION	49;69;92;132;150;226;227;235;291;383;416;420;461;552
CCLE Hybrid Capture Mutations	DHFR	DHFR_p._ANY_CODING_MUTATION	15;173;210;640
CCLE Hybrid Capture Mutations	DIABLO	DIABLO_p._ANY_CODING_MUTATION	144;307;386;420;500;538;541
CCLE Hybrid Capture Mutations	DICER1	DICER1_p._ANY_CODING_MUTATION	16;23;75;126;130;131;132;133;135;141;143;144;146;153;157;173;189;192;193;195;203;213;218;305;326;331;344;351;356;378;393;420;512;519;548;586;594;613;633;634;639
CCLE Hybrid Capture Mutations	DICER1	DICER1_p.E1420	356;512;519
CCLE Hybrid Capture Mutations	DIP2C	DIP2C_p._ANY_CODING_MUTATION	3;44;54;56;115;124;126;128;130;135;136;146;150;157;158;175;176;179;185;189;195;203;215;220;226;230;267;268;283;292;310;311;314;336;359;387;420;435;437;451;473;500;526;538;564;575;606;629
CCLE Hybrid Capture Mutations	DKK1	DKK1_p._ANY_CODING_MUTATION	141;156;575
CCLE Hybrid Capture Mutations	DLC1	DLC1_p._ANY_CODING_MUTATION	124;128;130;135;141;145;153;161;183;189;192;195;199;203;205;213;215;218;219;221;226;252;255;266;272;275;287;311;327;332;357;375;378;392;397;420;426;436;439;499;535;571;584;615;639
CCLE Hybrid Capture Mutations	DLL1	DLL1_p._ANY_CODING_MUTATION	16;116;128;132;139;144;183;189;310;346;420;435;441;450;499;578
CCLE Hybrid Capture Mutations	DLL4	DLL4_p._ANY_CODING_MUTATION	102;128;137;185;189;193;210;238;367;426;449;500;537;572;579
CCLE Hybrid Capture Mutations	DMPK	DMPK_p._ANY_CODING_MUTATION	128;131;135;136;145;156;213;260;311;391;442;452;462;527;594;639;655
CCLE Hybrid Capture Mutations	DNAH8	DNAH8_p._ANY_CODING_MUTATION	10;14;53;58;62;68;78;81;84;89;96;98;111;113;121;122;126;128;129;130;131;132;136;137;138;141;143;145;146;151;173;178;183;185;189;191;193;195;203;213;215;218;220;221;226;228;237;244;247;249;252;255;265;266;269;271;276;282;286;296;303;312;322;326;338;339;340;343;350;356;358;359;360;377;379;380;392;403;412;417;420;421;422;435;437;439;453;461;465;468;481;491;498;510;512;515;516;531;533;536;538;544;575…
CCLE Hybrid Capture Mutations	DNAH8	DNAH8_p.A46	247;249;252;421
CCLE Hybrid Capture Mutations	DNAH8	DNAH8_p.A46E	247;249;252;421
CCLE Hybrid Capture Mutations	DNAH8	DNAH8_p.G3545	122;183;439;596
CCLE Hybrid Capture Mutations	DNAH8	DNAH8_p.G3545D	122;183;439;596
CCLE Hybrid Capture Mutations	DNAH8	DNAH8_p.P4475	129;269;439
CCLE Hybrid Capture Mutations	DNAH8	DNAH8_p.P4475L	129;269;439
CCLE Hybrid Capture Mutations	DNMT1	DNMT1_p._ANY_CODING_MUTATION	34;132;142;144;227;252;258;298;330;340;388;429;498;507;526;551;592;628
CCLE Hybrid Capture Mutations	DNMT3B	DNMT3B_p._ANY_CODING_MUTATION	17;39;53;124;136;139;144;174;186;187;189;193;210;213;218;219;225;226;232;380;420;449;464;481;526;560;577;579;639;662
CCLE Hybrid Capture Mutations	DNMT3B	DNMT3B_p.R440	17;39;174;193;225;226;232;481;526;577;579;639;662
CCLE Hybrid Capture Mutations	DNMT3B	DNMT3B_p.R440fs	17;39;174;193;225;226;232;481;526;577;579;639;662
CCLE Hybrid Capture Mutations	DOCK3	DOCK3_p._ANY_CODING_MUTATION	7;9;41;53;60;84;87;103;124;126;129;132;135;136;137;138;139;141;143;145;157;168;183;185;192;193;195;197;201;202;203;206;210;213;215;218;220;226;247;291;293;332;338;348;353;356;372;416;418;449;498;500;513;529;530;538;544;547;553;554;571;572;575;578;584;632
CCLE Hybrid Capture Mutations	DOCK3	DOCK3_p.T1850	137;139;143;157;183;185;192;202;203;210;215;220;226;416;449;500;571;575;584
CCLE Hybrid Capture Mutations	DOCK3	DOCK3_p.T1850fs	137;139;143;157;183;185;192;202;203;210;215;220;226;416;449;500;571;575;584
CCLE Hybrid Capture Mutations	DPYD	DPYD_p._ANY_CODING_MUTATION	24;56;70;89;110;128;135;136;141;145;164;166;167;193;199;210;214;215;219;221;227;230;241;246;268;274;287;310;312;325;343;406;443;449;465;512;513;526;531;538;544;554;583;595;613
CCLE Hybrid Capture Mutations	DPYD	DPYD_p.F707	128;221;268;449
CCLE Hybrid Capture Mutations	DPYD	DPYD_p.F707fs	128;221;268;449
CCLE Hybrid Capture Mutations	DRD2	DRD2_p._ANY_CODING_MUTATION	24;32;35;53;115;128;135;137;183;195;203;213;275;300;317;351;424;464;516;529;530;622;628;653
CCLE Hybrid Capture Mutations	DST	DST_p._ANY_CODING_MUTATION	8;23;24;26;31;44;48;53;57;69;82;87;102;108;112;124;126;127;128;129;130;131;132;135;136;137;138;141;143;144;145;156;157;164;167;180;189;192;193;195;199;202;203;209;213;215;216;218;225;226;246;263;265;267;269;271;313;318;326;328;334;340;344;349;372;377;380;383;384;388;391;393;394;416;420;437;443;444;446;462;499;500;504;508;535;537;538;543;550;552;560;568;569;571;575;578;581;587;597;603;611;622;624;…
CCLE Hybrid Capture Mutations	DST	DST_p.K2486	135;199;420
CCLE Hybrid Capture Mutations	DST	DST_p.K2486fs	135;199;420
CCLE Hybrid Capture Mutations	DST	DST_p.L1677	44;143;416
CCLE Hybrid Capture Mutations	DST	DST_p.L1677fs	44;143;416
CCLE Hybrid Capture Mutations	DSTYK	DSTYK_p._ANY_CODING_MUTATION	40;70;126;130;131;135;138;144;192;195;208;211;213;219;255;283;364;371;406;416;423;427;500;509;592;633;664
CCLE Hybrid Capture Mutations	DTX1	DTX1_p._ANY_CODING_MUTATION	44;128;141;203;211;243;344;364;416;458;463;551;584;612
CCLE Hybrid Capture Mutations	DTX1	DTX1_p.R164	128;584;612
CCLE Hybrid Capture Mutations	DUSP6	DUSP6_p._ANY_CODING_MUTATION	128;146;221;268;377;380;405;500;513;535;548;613
CCLE Hybrid Capture Mutations	DVL1	DVL1_p._ANY_CODING_MUTATION	15;49;71;137;145;157;176;189;200;215;218;232;361;398;435;468;535;538;551;589;592;598;603;607;627;644
CCLE Hybrid Capture Mutations	DYRK1A	DYRK1A_p._ANY_CODING_MUTATION	126;128;132;135;183;189;195;202;205;210;218;219;285;301;449;451;499;520;538;569;604;608;613;643;657
CCLE Hybrid Capture Mutations	DYRK1B	DYRK1B_p._ANY_CODING_MUTATION	9;128;129;133;145;213;248;268;350;386;429;437
CCLE Hybrid Capture Mutations	DYRK2	DYRK2_p._ANY_CODING_MUTATION	67;124;132;137;146;210;213;218;221;226;255;266;326;335;392;553
CCLE Hybrid Capture Mutations	DYRK3	DYRK3_p._ANY_CODING_MUTATION	9;124;126;129;189;196;198;218;349;351;390;450;541;571
CCLE Hybrid Capture Mutations	DYRK4	DYRK4_p._ANY_CODING_MUTATION	38;53;72;93;124;126;128;132;133;135;136;148;150;184;193;203;206;213;248;260;283;300;332;364;368;461;498;539;558;571;575;620;644
CCLE Hybrid Capture Mutations	DYRK4	DYRK4_p.K158	93;135;148;248
CCLE Hybrid Capture Mutations	DYRK4	DYRK4_p.K158Q	93;135;148;248
CCLE Hybrid Capture Mutations	DYRK4	DYRK4_p.K468	53;571;575
CCLE Hybrid Capture Mutations	DYRK4	DYRK4_p.K468fs	53;571;575
CCLE Hybrid Capture Mutations	E2F1	E2F1_p._ANY_CODING_MUTATION	157;196;219;325;363;413;511;513
CCLE Hybrid Capture Mutations	ECM1	ECM1_p._ANY_CODING_MUTATION	128;193;213;218;226;269;313;323;334;368;384;392;424;512;577;592;607;609
CCLE Hybrid Capture Mutations	EDNRA	EDNRA_p._ANY_CODING_MUTATION	61;89;141;189;195;213;271;316;391;507;538;584
CCLE Hybrid Capture Mutations	EDNRB	EDNRB_p._ANY_CODING_MUTATION	124;130;131;136;141;170;195;196;204;277;283;296;312;348;391;500;585
CCLE Hybrid Capture Mutations	EDNRB	EDNRB_p.Y376	124;130;131;136;500
CCLE Hybrid Capture Mutations	EDNRB	EDNRB_p.Y376fs	124;130;131;136;500
CCLE Hybrid Capture Mutations	EEF1D	EEF1D_p._ANY_CODING_MUTATION	1;40;53;128;139;157;192;199;202;213;329;387;420;493
CCLE Hybrid Capture Mutations	EEF1D	EEF1D_p.A692	1;40;213
CCLE Hybrid Capture Mutations	EEF1D	EEF1D_p.A692T	1;40;213
CCLE Hybrid Capture Mutations	EEF2K	EEF2K_p._ANY_CODING_MUTATION	53;61;129;157;172;189;206;211;226;358;629
CCLE Hybrid Capture Mutations	EGF	EGF_p._ANY_CODING_MUTATION	4;5;15;18;19;56;60;108;110;112;121;122;124;128;129;132;135;137;141;146;147;150;156;157;164;172;174;189;191;193;199;200;212;214;218;219;221;226;238;239;240;243;248;250;282;298;313;365;382;385;386;389;392;395;403;405;416;421;424;440;441;443;447;462;479;482;483;488;521;562;568;569;576;581;585;586;592;593;595;596;599;611;615;637;639;640
CCLE Hybrid Capture Mutations	EGF	EGF_p.E1134	4;5;15;18;19;56;60;108;110;112;121;122;129;132;137;146;147;150;156;157;172;174;191;214;218;221;238;239;240;248;250;298;382;385;386;389;392;403;421;424;440;443;447;462;479;482;483;488;521;568;569;581;585;586;592;593;595;596;611;637;639;640
CCLE Hybrid Capture Mutations	EGF	EGF_p.E1134fs	4;5;15;18;19;56;60;108;110;112;121;122;129;132;137;146;147;150;156;157;172;174;191;214;218;221;238;239;240;248;250;298;382;385;386;389;392;403;421;424;440;443;447;462;479;482;483;488;521;568;569;581;585;586;592;593;595;596;611;637;639;640
CCLE Hybrid Capture Mutations	EGFR	EGFR_p._ANY_CODING_MUTATION	91;92;96;108;126;128;134;135;136;137;141;183;189;203;207;215;219;226;252;280;282;284;287;297;307;316;325;331;344;349;371;391;394;409;411;479;543;554
CCLE Hybrid Capture Mutations	EGFR	EGFR_p.E746	280;284;287;316;371
CCLE Hybrid Capture Mutations	EGFR	EGFR_p.E746del	280;284;287;316;371
CCLE Hybrid Capture Mutations	EGFR	EGFR_p.E746del5	280;287;316;371
CCLE Hybrid Capture Mutations	EHBP1	EHBP1_p._ANY_CODING_MUTATION	2;3;13;16;37;43;128;139;141;168;193;195;199;213;215;221;229;263;268;276;308;335;350;351;365;369;374;376;416;513;541;547;613;624;639;641;642
CCLE Hybrid Capture Mutations	EIF2AK1	EIF2AK1_p._ANY_CODING_MUTATION	13;34;52;90;141;155;197;212;218;221;226;479;500;513;619
CCLE Hybrid Capture Mutations	EIF2AK2	EIF2AK2_p._ANY_CODING_MUTATION	114;141;195;213;220;268;275;346;656
CCLE Hybrid Capture Mutations	EIF2AK3	EIF2AK3_p._ANY_CODING_MUTATION	7;53;75;124;126;128;130;131;132;138;189;197;198;199;203;213;237;271;288;300;333;340;377;395;449;455;478;482;495;500;637
CCLE Hybrid Capture Mutations	EIF2AK4	EIF2AK4_p._ANY_CODING_MUTATION	21;128;133;157;183;185;189;202;207;213;215;219;236;255;269;297;307;311;325;338;424;437;582;613;616;624;644
CCLE Hybrid Capture Mutations	EIF2AK4	EIF2AK4_p.I854	189;219;644
CCLE Hybrid Capture Mutations	EIF2AK4	EIF2AK4_p.I854fs	189;219;644
CCLE Hybrid Capture Mutations	EIF2B5	EIF2B5_p._ANY_CODING_MUTATION	24;134;136;150;213;285;503;559;592
CCLE Hybrid Capture Mutations	EIF2S1	EIF2S1_p._ANY_CODING_MUTATION	214;366;500;549;613
CCLE Hybrid Capture Mutations	EIF3A	EIF3A_p._ANY_CODING_MUTATION	20;96;124;128;132;135;136;139;179;183;189;195;199;203;210;218;219;221;224;227;238;239;244;275;287;292;295;301;319;320;334;359;363;391;403;437;439;461;521;554;571;577;592;620;632;636;640
CCLE Hybrid Capture Mutations	EIF3A	EIF3A_p.V1330	20;179;238;239;244;292;439;461;521;577
CCLE Hybrid Capture Mutations	EIF3A	EIF3A_p.V1330F	20;179;238;239;244;292;439;461;521;577
CCLE Hybrid Capture Mutations	EIF3H	EIF3H_p._ANY_CODING_MUTATION	124;129;146;193;195;199;219;344;393;480
CCLE Hybrid Capture Mutations	EIF4A1	EIF4A1_p._ANY_CODING_MUTATION	126;131;146;183;193;213;340;376;407;474;536;613;644
CCLE Hybrid Capture Mutations	EIF4A2	EIF4A2_p._ANY_CODING_MUTATION	128;136;146;210;218;221;340;433;569;590;613
CCLE Hybrid Capture Mutations	EIF4B	EIF4B_p._ANY_CODING_MUTATION	40;60;105;128;129;130;137;171;183;193;216;218;250;255;272;320;333;359;397;500;533;579;621;645;651;654;655
CCLE Hybrid Capture Mutations	EIF4E	EIF4E_p._ANY_CODING_MUTATION	124;132;144;192;193;213;225;226;499
CCLE Hybrid Capture Mutations	EIF4EBP1	EIF4EBP1_p._ANY_CODING_MUTATION	141;192;209;449
CCLE Hybrid Capture Mutations	EIF4EBP1	EIF4EBP1_p.A107	141;192;449
CCLE Hybrid Capture Mutations	EIF4EBP1	EIF4EBP1_p.A107V	141;192;449
CCLE Hybrid Capture Mutations	EIF4G1	EIF4G1_p._ANY_CODING_MUTATION	26;33;45;57;68;77;90;128;129;133;135;137;138;145;146;168;176;183;185;189;193;195;198;203;210;213;215;218;219;221;222;274;295;297;313;325;339;341;350;361;362;369;399;406;420;423;436;474;539;542;569;575;576;590;601;613;636;648
CCLE Hybrid Capture Mutations	EIF4G1	EIF4G1_p.G479	203;222;297;339;361;362;648
CCLE Hybrid Capture Mutations	EIF4G1	EIF4G1_p.G479del	203;222;297;339;361;362;648
CCLE Hybrid Capture Mutations	EIF4G1	EIF4G1_p.G479del3	203;222;297;339;361;362;648
CCLE Hybrid Capture Mutations	EIF5A	EIF5A_p._ANY_CODING_MUTATION	111;132;133;183;593;613;635
CCLE Hybrid Capture Mutations	EIF5A2	EIF5A2_p._ANY_CODING_MUTATION	53;137;195;198
CCLE Hybrid Capture Mutations	ELAVL1	ELAVL1_p._ANY_CODING_MUTATION	51;126;128;131;135;145;150;198;210;213;215;268;500;541;663
CCLE Hybrid Capture Mutations	ELF4	ELF4_p._ANY_CODING_MUTATION	126;135;219;221;266;286;299;356;364;424;500;512;536;643
CCLE Hybrid Capture Mutations	ELK1	ELK1_p._ANY_CODING_MUTATION	99;130;135;210;219;263;613
CCLE Hybrid Capture Mutations	ELL	ELL_p._ANY_CODING_MUTATION	89;116;129;185;189;220;233;351
CCLE Hybrid Capture Mutations	ELN	ELN_p._ANY_CODING_MUTATION	41;51;71;79;128;141;144;189;198;205;210;225;297;387;500;511;513;538;644
CCLE Hybrid Capture Mutations	EML4	EML4_p._ANY_CODING_MUTATION	34;128;129;136;166;189;193;201;221;246;280;287;313;361;372;392;398;410;449;488;504;575;592;605;606;635
CCLE Hybrid Capture Mutations	ENSG00000091436	ENSG00000091436_p._ANY_CODING_MUTATION	23;79;81;89;130;131;132;144;158;177;192;254;255;286;336;365;392;397;463;513;569;589;613;641;642
CCLE Hybrid Capture Mutations	ENSG00000091436	ENSG00000091436_p.E83	132;641;642
CCLE Hybrid Capture Mutations	ENSG00000091436	ENSG00000091436_p.E83splice	132;641;642
CCLE Hybrid Capture Mutations	ENSG00000091436	ENSG00000091436_p.H651	23;177;589
CCLE Hybrid Capture Mutations	ENSG00000091436	ENSG00000091436_p.H651R	23;177;589
CCLE Hybrid Capture Mutations	ENSG00000185900	ENSG00000185900_p._ANY_CODING_MUTATION	126;128;134;145;189;213;215;216;305;407;465;499;574;607
CCLE Hybrid Capture Mutations	EP300	EP300_p._ANY_CODING_MUTATION	12;33;46;90;98;127;128;129;130;132;133;135;137;138;141;143;144;145;147;151;189;192;193;198;202;209;210;211;213;215;218;221;226;227;229;239;250;276;285;297;298;301;305;320;343;345;346;392;399;401;404;416;433;435;444;452;465;474;487;488;489;498;500;504;507;513;532;576;582;584;590;592;596;598;603;644;645;654;664
CCLE Hybrid Capture Mutations	EP300	EP300_p.K1468	192;210;213;226
CCLE Hybrid Capture Mutations	EP300	EP300_p.K1468fs	192;210;213;226
CCLE Hybrid Capture Mutations	EPHA1	EPHA1_p._ANY_CODING_MUTATION	44;124;128;131;135;143;144;177;189;193;213;253;259;272;331;436;449;512;538;596;609;636;637
CCLE Hybrid Capture Mutations	EPHA10	EPHA10_p._ANY_CODING_MUTATION	49;53;61;86;145;183;193;195;203;213;292;301;312;356;398;407;416;516
CCLE Hybrid Capture Mutations	EPHA2	EPHA2_p._ANY_CODING_MUTATION	17;96;128;129;131;133;144;145;183;189;193;196;203;215;266;308;420;438;449;513;538;581;584;609;630
CCLE Hybrid Capture Mutations	EPHA2	EPHA2_p.G240	128;129;133;420
CCLE Hybrid Capture Mutations	EPHA2	EPHA2_p.G240fs	128;129;133;420
CCLE Hybrid Capture Mutations	EPHA3	EPHA3_p._ANY_CODING_MUTATION	42;95;120;122;127;128;131;136;144;166;197;199;218;220;226;229;238;260;271;273;274;294;318;321;328;340;342;344;367;376;396;419;450;474;498;503;513;533;535;538;590;592;601;603
CCLE Hybrid Capture Mutations	EPHA4	EPHA4_p._ANY_CODING_MUTATION	15;124;126;127;131;135;136;137;141;146;183;189;193;195;203;213;221;239;269;294;340;383;394;490;535;610;644;653
CCLE Hybrid Capture Mutations	EPHA5	EPHA5_p._ANY_CODING_MUTATION	17;39;63;64;75;98;126;127;128;132;133;135;138;144;183;189;192;193;195;203;213;218;228;257;291;292;295;312;313;329;333;340;342;343;344;351;357;371;378;381;383;409;416;420;499;506;519;538;583;592;594;621;657
CCLE Hybrid Capture Mutations	EPHA5	EPHA5_p.S674	17;371;592
CCLE Hybrid Capture Mutations	EPHA5	EPHA5_p.S674T	17;371;592
CCLE Hybrid Capture Mutations	EPHA6	EPHA6_p._ANY_CODING_MUTATION	39;44;79;98;115;128;132;135;141;150;166;187;189;193;195;199;205;212;213;215;220;221;226;303;305;308;325;340;365;373;377;380;386;388;404;405;416;453;502;513;535;538;554;559;571;575;581;598;613;618;638
CCLE Hybrid Capture Mutations	EPHA6	EPHA6_p.R1089	39;166;416
CCLE Hybrid Capture Mutations	EPHA7	EPHA7_p._ANY_CODING_MUTATION	47;63;89;129;130;132;135;141;169;182;186;189;198;203;213;215;218;220;255;305;313;317;325;326;344;351;359;364;394;399;416;450;455;487;498;524;527;534;538;575;579;613;635;655
CCLE Hybrid Capture Mutations	EPHA8	EPHA8_p._ANY_CODING_MUTATION	21;49;98;100;126;129;136;144;158;170;193;195;196;206;213;215;236;251;313;317;332;345;447;474;513;535;537;590;598;629
CCLE Hybrid Capture Mutations	EPHB1	EPHB1_p._ANY_CODING_MUTATION	17;26;43;53;70;91;113;128;132;137;141;184;189;195;203;209;210;213;215;219;227;273;294;305;312;317;318;321;323;325;334;348;377;386;388;391;427;437;471;499;520;541;554;576;613;621;635;652
CCLE Hybrid Capture Mutations	EPHB2	EPHB2_p._ANY_CODING_MUTATION	127;128;130;131;133;135;136;141;163;183;189;193;195;203;213;215;219;221;301;315;336;357;373;384;390;396;453;498;499;541;592;644
CCLE Hybrid Capture Mutations	EPHB3	EPHB3_p._ANY_CODING_MUTATION	20;56;62;128;130;132;195;198;203;205;213;268;295;408;503;531;535;578;590;630
CCLE Hybrid Capture Mutations	EPHB4	EPHB4_p._ANY_CODING_MUTATION	26;89;126;128;129;144;183;189;195;196;199;213;226;241;312;377;389;424;433;439;446;483;498;500;535;590;604;608
CCLE Hybrid Capture Mutations	EPHB6	EPHB6_p._ANY_CODING_MUTATION	29;71;74;85;99;101;103;113;115;120;124;128;129;133;135;136;183;189;195;210;213;215;219;229;240;247;269;274;285;305;308;317;334;340;342;351;357;375;377;382;420;474;488;498;533;538;541;547;569;571;592;611;643;644;648;656
CCLE Hybrid Capture Mutations	EPHB6	EPHB6_p.X176	71;229;377;643
CCLE Hybrid Capture Mutations	EPHB6	EPHB6_p.X176ins	71;229;377;643
CCLE Hybrid Capture Mutations	EPHB6	EPHB6_p.X176insS	71;229;377;643
CCLE Hybrid Capture Mutations	EPHB6	EPHB6_p.Y132	120;285;547
CCLE Hybrid Capture Mutations	EPHB6	EPHB6_p.Y132*	120;285;547
CCLE Hybrid Capture Mutations	EPO	EPO_p._ANY_CODING_MUTATION	126;210;213;215;403;467
CCLE Hybrid Capture Mutations	EPS15	EPS15_p._ANY_CODING_MUTATION	21;24;40;126;128;132;136;144;156;189;193;195;204;213;265;268;277;344;348;351;613
CCLE Hybrid Capture Mutations	EPS15	EPS15_p.D705	21;126;156
CCLE Hybrid Capture Mutations	EPS15	EPS15_p.D705N	21;126;156
CCLE Hybrid Capture Mutations	ERBB2	ERBB2_p._ANY_CODING_MUTATION	70;71;92;99;130;131;133;135;141;144;183;189;198;203;219;268;311;323;325;340;376;416;435;512;536;573;577;605;606;643;664
CCLE Hybrid Capture Mutations	ERBB2	ERBB2_p.L755	99;189;577
CCLE Hybrid Capture Mutations	ERBB2	ERBB2_p.L755S	99;189;577
CCLE Hybrid Capture Mutations	ERBB2	ERBB2_p.V842	130;131;268;416
CCLE Hybrid Capture Mutations	ERBB2	ERBB2_p.V842I	130;131;268;416
CCLE Hybrid Capture Mutations	ERBB3	ERBB3_p._ANY_CODING_MUTATION	7;15;33;38;60;72;122;130;131;132;135;136;144;145;170;182;189;192;193;203;213;215;218;221;268;305;313;324;334;340;387;420;449;456;461;498;500;592;600;663
CCLE Hybrid Capture Mutations	ERBB3	ERBB3_p.R475	130;131;132
CCLE Hybrid Capture Mutations	ERBB3	ERBB3_p.R475W	130;131;132
CCLE Hybrid Capture Mutations	ERBB3	ERBB3_p.R967	60;170;461
CCLE Hybrid Capture Mutations	ERBB3	ERBB3_p.R967K	60;170;461
CCLE Hybrid Capture Mutations	ERBB4	ERBB4_p._ANY_CODING_MUTATION	3;43;45;63;64;69;128;129;130;131;135;136;138;144;145;149;179;183;186;193;195;198;199;203;211;212;213;215;218;220;250;274;276;279;295;301;312;321;325;327;333;334;344;349;351;357;367;378;391;401;510;513;535;538;541;554;575;582;604;605;651
CCLE Hybrid Capture Mutations	ERC1	ERC1_p._ANY_CODING_MUTATION	13;93;124;130;131;132;134;136;141;144;145;162;183;189;193;195;203;205;210;213;218;226;253;268;306;319;338;389;403;410;444;513;529;530;535;544;575;653;658
CCLE Hybrid Capture Mutations	ERCC2	ERCC2_p._ANY_CODING_MUTATION	98;130;193;195;205;212;344;364;365;560;586
CCLE Hybrid Capture Mutations	ERCC3	ERCC3_p._ANY_CODING_MUTATION	102;128;141;199;216;252;300;344;404;416;438;487;500
CCLE Hybrid Capture Mutations	ERCC4	ERCC4_p._ANY_CODING_MUTATION	57;112;128;144;189;193;195;268;272;421;436;450;598;605
CCLE Hybrid Capture Mutations	ERCC5	ERCC5_p._ANY_CODING_MUTATION	53;68;77;101;112;124;126;132;135;136;139;150;192;193;213;218;222;244;274;312;313;352;357;362;424;449;488;500;553;555;561;575;632
CCLE Hybrid Capture Mutations	ERCC6	ERCC6_p._ANY_CODING_MUTATION	40;46;63;64;96;124;126;135;141;146;150;183;189;193;197;199;203;213;219;220;255;283;285;299;300;338;351;394;403;416;433;437;452;463;480;482;499;509;520;542;592;593;613;632;648;658
CCLE Hybrid Capture Mutations	ERCC6	ERCC6_p.R735	463;482;509;632
CCLE Hybrid Capture Mutations	ERCC6	ERCC6_p.R735L	463;482;509;632
CCLE Hybrid Capture Mutations	ERG	ERG_p._ANY_CODING_MUTATION	16;132;133;177;182;199;213;219;220;257;307;316;393;466;510;538;609;619;662
CCLE Hybrid Capture Mutations	ERLIN2	ERLIN2_p._ANY_CODING_MUTATION	132;198;221;314;344;364;368
CCLE Hybrid Capture Mutations	ERN1	ERN1_p._ANY_CODING_MUTATION	128;132;136;158;198;203;210;213;224;266;268;324;398;416;437;499;538;570;571;573;647
CCLE Hybrid Capture Mutations	ERN2	ERN2_p._ANY_CODING_MUTATION	41;135;142;193;203;213;249;305;331;364;368;382;403;416;437;510;513;537;538;595
CCLE Hybrid Capture Mutations	ESR1	ESR1_p._ANY_CODING_MUTATION	98;136;141;150;189;195;218;219;237;246;292;344;379;432;469;538;575;618
CCLE Hybrid Capture Mutations	ESR2	ESR2_p._ANY_CODING_MUTATION	33;39;128;227;351;382;409;498;542;576
CCLE Hybrid Capture Mutations	ETV1	ETV1_p._ANY_CODING_MUTATION	21;38;72;126;131;132;133;137;138;189;193;198;210;306;314;336;364;373;376;391;413;456;500;517;550;552;585;611;613
CCLE Hybrid Capture Mutations	ETV1	ETV1_p.P138	126;198;210
CCLE Hybrid Capture Mutations	ETV4	ETV4_p._ANY_CODING_MUTATION	78;135;215;564
CCLE Hybrid Capture Mutations	ETV5	ETV5_p._ANY_CODING_MUTATION	68;92;184;193;195;334;498;499;515
CCLE Hybrid Capture Mutations	ETV6	ETV6_p._ANY_CODING_MUTATION	68;129;134;144;148;196;207;213;221;226;296;364;386;513;568;664
CCLE Hybrid Capture Mutations	EWSR1	EWSR1_p._ANY_CODING_MUTATION	5;126;132;135;139;141;185;193;213;540;567;613
CCLE Hybrid Capture Mutations	EXT1	EXT1_p._ANY_CODING_MUTATION	7;31;44;46;129;130;131;132;141;143;156;158;193;203;210;213;215;218;219;239;483;500;515;575;613;625
CCLE Hybrid Capture Mutations	EXT1	EXT1_p.V538	130;131;156;158;239
CCLE Hybrid Capture Mutations	EXT1	EXT1_p.V538I	130;131;156;158;239
CCLE Hybrid Capture Mutations	EXT2	EXT2_p._ANY_CODING_MUTATION	108;145;156;173;183;189;195;213;239;300;321;335;365;371;449;538;592;653
CCLE Hybrid Capture Mutations	EXT2	EXT2_p.R332	108;173;189
CCLE Hybrid Capture Mutations	EXT2	EXT2_p.R332H	108;173;189
CCLE Hybrid Capture Mutations	F12	F12_p._ANY_CODING_MUTATION	195;213;253;392;492;500;587
CCLE Hybrid Capture Mutations	F8	F8_p._ANY_CODING_MUTATION	85;126;141;145;146;151;156;183;185;189;193;195;197;198;210;218;221;222;239;252;259;268;271;310;312;313;339;356;364;380;420;433;439;499;500;512;513;532;533;537;538;551;592;593;604;622;634;640;663
CCLE Hybrid Capture Mutations	F8	F8_p.N1460	145;189;221;592
CCLE Hybrid Capture Mutations	F8	F8_p.N1460fs	145;189;221;592
CCLE Hybrid Capture Mutations	FAM118A	FAM118A_p._ANY_CODING_MUTATION	129;195;210;215;491;521
CCLE Hybrid Capture Mutations	FAM132A	FAM132A_p._ANY_CODING_MUTATION	8;130;136;219;621
CCLE Hybrid Capture Mutations	FANCA	FANCA_p._ANY_CODING_MUTATION	71;100;105;126;129;132;136;146;150;198;199;203;209;210;213;218;219;247;288;295;392;416;417;453;538;578;582;594
CCLE Hybrid Capture Mutations	FANCB	FANCB_p._ANY_CODING_MUTATION	70;127;226;230;281;368;499;517
CCLE Hybrid Capture Mutations	FANCC	FANCC_p._ANY_CODING_MUTATION	12;69;99;127;189;195;213;215;221;340;356;365;391;449;454;541
CCLE Hybrid Capture Mutations	FANCD2	FANCD2_p._ANY_CODING_MUTATION	32;53;57;113;127;136;141;146;149;157;193;203;218;226;311;315;365;430;440;509;513;538;571;594;598
CCLE Hybrid Capture Mutations	FANCE	FANCE_p._ANY_CODING_MUTATION	70;71;131;135;185;189;210;256;364;437;480;498;568;575
CCLE Hybrid Capture Mutations	FANCF	FANCF_p._ANY_CODING_MUTATION	26;39;114;144;145;146;213;239;240;303;313;378;479;504
CCLE Hybrid Capture Mutations	FANCG	FANCG_p._ANY_CODING_MUTATION	8;16;31;42;103;132;146;148;189;239;389;459;583;590;628
CCLE Hybrid Capture Mutations	FANCI	FANCI_p._ANY_CODING_MUTATION	124;126;132;134;136;150;178;193;195;198;210;213;218;221;226;263;281;349;350;377;380;388;396;406;416;464;526;529;530;538;576;578;594
CCLE Hybrid Capture Mutations	FANCL	FANCL_p._ANY_CODING_MUTATION	128;132;189;200;213;218;332;416;535;572;621
CCLE Hybrid Capture Mutations	FANCM	FANCM_p._ANY_CODING_MUTATION	20;52;68;89;99;115;126;128;130;131;132;137;138;141;145;155;158;162;189;193;195;196;202;203;215;219;220;248;259;260;268;313;321;323;349;351;364;365;371;397;444;473;538;559;579;598;615;621
CCLE Hybrid Capture Mutations	FANCM	FANCM_p.Q1333	145;189;196;215;268
CCLE Hybrid Capture Mutations	FANCM	FANCM_p.Q1333fs	145;189;196;215;268
CCLE Hybrid Capture Mutations	FAS	FAS_p._ANY_CODING_MUTATION	129;135;141;203;215;218;313;322;326;387;559
CCLE Hybrid Capture Mutations	FASLG	FASLG_p._ANY_CODING_MUTATION	26;126;210;218;282;321;499;580;630
CCLE Hybrid Capture Mutations	FASN	FASN_p._ANY_CODING_MUTATION	38;43;53;72;130;135;138;143;144;145;157;179;189;192;193;197;200;203;205;210;215;221;227;319;325;377;420;438;498;500;504;541;579;584;611;637
CCLE Hybrid Capture Mutations	FBLN5	FBLN5_p._ANY_CODING_MUTATION	48;128;136;137;141;189;213;338;420;444;524;531;541;560
CCLE Hybrid Capture Mutations	FBN1	FBN1_p._ANY_CODING_MUTATION	32;44;75;87;99;124;128;129;132;133;134;135;136;137;141;150;157;166;175;189;192;193;195;198;199;201;206;213;218;222;223;255;259;269;272;275;282;292;297;300;313;325;326;328;333;336;338;350;352;367;373;374;377;403;420;452;466;473;492;498;500;537;550;552;553;575;634;636;658;664
CCLE Hybrid Capture Mutations	FBN2	FBN2_p._ANY_CODING_MUTATION	10;28;31;53;64;68;73;99;124;126;128;129;131;132;136;141;143;145;146;150;157;161;172;181;183;185;189;192;193;197;202;204;213;215;218;221;225;236;247;255;267;272;275;276;277;279;292;298;308;314;315;325;328;340;342;343;344;346;351;356;357;362;364;365;367;368;380;389;393;406;425;437;442;454;510;513;538;554;575;599;616;622;639;652;653;654;664
CCLE Hybrid Capture Mutations	FBN2	FBN2_p.D548	146;292;599
CCLE Hybrid Capture Mutations	FBN2	FBN2_p.D548A	146;292;599
CCLE Hybrid Capture Mutations	FBN2	FBN2_p.T2278	172;236;652
CCLE Hybrid Capture Mutations	FBN2	FBN2_p.T2278M	172;236;652
CCLE Hybrid Capture Mutations	FBXO43	FBXO43_p._ANY_CODING_MUTATION	43;67;70;105;137;141;144;191;195;210;218;349;451;596;617;620;644
CCLE Hybrid Capture Mutations	FBXW7	FBXW7_p._ANY_CODING_MUTATION	15;87;124;126;127;128;131;132;133;138;141;142;144;150;169;174;183;184;195;199;203;209;213;215;218;219;220;221;222;224;226;228;313;329;340;344;351;358;400;444;451;494;526;580;584;587
CCLE Hybrid Capture Mutations	FBXW7	FBXW7_p.R465	127;150;183;195;215;451;587
CCLE Hybrid Capture Mutations	FBXW7	FBXW7_p.R465C	127;183;195;215;451;587
CCLE Hybrid Capture Mutations	FBXW7	FBXW7_p.R473	126;128;220
CCLE Hybrid Capture Mutations	FBXW7	FBXW7_p.R473fs	126;128;220
CCLE Hybrid Capture Mutations	FBXW7	FBXW7_p.R479	132;142;184;218;224;526
CCLE Hybrid Capture Mutations	FBXW7	FBXW7_p.R479Q	132;142;184;218;224;526
CCLE Hybrid Capture Mutations	FBXW7	FBXW7_p.R505	138;199;203;209;344;444;584
CCLE Hybrid Capture Mutations	FBXW7	FBXW7_p.R505C	138;199;209;584
CCLE Hybrid Capture Mutations	FCGR2B	FCGR2B_p._ANY_CODING_MUTATION	193;365;622
CCLE Hybrid Capture Mutations	FCRL4	FCRL4_p._ANY_CODING_MUTATION	68;126;132;144;183;218;263;312;315;332;358;379;499;500;513;587;634;647
CCLE Hybrid Capture Mutations	FER	FER_p._ANY_CODING_MUTATION	1;29;105;126;129;130;139;141;145;183;193;202;203;218;228;268;291;333;342;386;405;441;443;500;553;576;579;645
CCLE Hybrid Capture Mutations	FER	FER_p.L474	183;202;268
CCLE Hybrid Capture Mutations	FER	FER_p.L474fs	183;202;268
CCLE Hybrid Capture Mutations	FES	FES_p._ANY_CODING_MUTATION	102;126;135;146;185;198;210;219;310;439;468;645
CCLE Hybrid Capture Mutations	FEV	FEV_p._ANY_CODING_MUTATION	7;129;498
CCLE Hybrid Capture Mutations	FFAR2	FFAR2_p._ANY_CODING_MUTATION	183;189;193;203;213;330;437;500
CCLE Hybrid Capture Mutations	FGF1	FGF1_p._ANY_CODING_MUTATION	141;310;312;538
CCLE Hybrid Capture Mutations	FGF19	FGF19_p._ANY_CODING_MUTATION	134;199;459
CCLE Hybrid Capture Mutations	FGF20	FGF20_p._ANY_CODING_MUTATION	128;132;416;458;584;592
CCLE Hybrid Capture Mutations	FGF4	FGF4_p._ANY_CODING_MUTATION	133;192;287;420;549;553
CCLE Hybrid Capture Mutations	FGFR1	FGFR1_p._ANY_CODING_MUTATION	7;49;85;105;122;128;137;189;192;193;202;203;210;220;226;272;500;538;578;584;592
CCLE Hybrid Capture Mutations	FGFR1OP	FGFR1OP_p._ANY_CODING_MUTATION	31;126;128;132;135;150;203;209;219;226;333;433;458;507
CCLE Hybrid Capture Mutations	FGFR2	FGFR2_p._ANY_CODING_MUTATION	48;124;126;129;132;135;137;139;143;144;164;192;213;214;216;220;255;332;333;363;376;480;494;507;510;575;590;637
CCLE Hybrid Capture Mutations	FGFR3	FGFR3_p._ANY_CODING_MUTATION	132;136;146;150;157;158;185;193;199;213;220;221;226;344;394;417;449;524;548;550;552;596;644;651
CCLE Hybrid Capture Mutations	FGFR3	FGFR3_p.S402	213;221;449
CCLE Hybrid Capture Mutations	FGFR3	FGFR3_p.S402fs	213;221;449
CCLE Hybrid Capture Mutations	FGFR4	FGFR4_p._ANY_CODING_MUTATION	46;69;86;128;132;135;193;213;219;295;340;341;417;432;436;441;531
CCLE Hybrid Capture Mutations	FGR	FGR_p._ANY_CODING_MUTATION	115;128;129;132;139;141;189;195;213;287;340;373;644
CCLE Hybrid Capture Mutations	FH	FH_p._ANY_CODING_MUTATION	126;135;169;213;218;219;253;393;394;406;420;438;555;601
CCLE Hybrid Capture Mutations	FH	FH_p.T285	135;393;406
CCLE Hybrid Capture Mutations	FH	FH_p.T285A	135;393;406
CCLE Hybrid Capture Mutations	FHIT	FHIT_p._ANY_CODING_MUTATION	53;135;179;273;351;424;583;664
CCLE Hybrid Capture Mutations	FIGF	FIGF_p._ANY_CODING_MUTATION	16;49;130;189;218;227;321;325;493;549
CCLE Hybrid Capture Mutations	FIP1L1	FIP1L1_p._ANY_CODING_MUTATION	53;103;139;141;144;157;189;198;202;251;385;538;575;584
CCLE Hybrid Capture Mutations	FIP1L1	FIP1L1_p.R483	139;144;189;198;202;575
CCLE Hybrid Capture Mutations	FIP1L1	FIP1L1_p.R483fs	139;144;189;198;202;575
CCLE Hybrid Capture Mutations	FLCN	FLCN_p._ANY_CODING_MUTATION	126;131;136;139;144;157;189;199;211;213;283;365;538;550;621;631;655
CCLE Hybrid Capture Mutations	FLI1	FLI1_p._ANY_CODING_MUTATION	43;115;126;128;129;189;197;204;219;229;274;344;364;366;398;433;498;499;533;538;575;613
CCLE Hybrid Capture Mutations	FLNA	FLNA_p._ANY_CODING_MUTATION	7;44;75;124;126;128;129;132;133;135;136;141;144;145;146;150;151;157;164;165;176;183;185;189;197;203;213;215;225;226;252;255;324;334;336;384;389;391;415;416;420;435;449;463;505;508;513;555;571;575;576;611;613;620;633
CCLE Hybrid Capture Mutations	FLNA	FLNA_p.N931	133;157;463
CCLE Hybrid Capture Mutations	FLNA	FLNA_p.N931D	133;157;463
CCLE Hybrid Capture Mutations	FLNB	FLNB_p._ANY_CODING_MUTATION	102;116;125;126;128;130;131;135;136;138;145;146;150;165;173;185;189;193;203;205;206;210;212;218;225;235;247;256;268;297;300;312;329;349;351;364;386;391;398;404;407;418;436;437;456;478;482;499;500;526;527;531;548;554;562;571;575;579;585;595;647;650;662
CCLE Hybrid Capture Mutations	FLNB	FLNB_p.D1264	173;398;404;407;418;562;579
CCLE Hybrid Capture Mutations	FLNB	FLNB_p.D1264E	173;398;404;407;418;562;579
CCLE Hybrid Capture Mutations	FLNC	FLNC_p._ANY_CODING_MUTATION	41;46;57;68;95;98;109;126;128;129;132;135;136;138;145;146;148;183;187;189;193;195;202;203;220;221;226;229;260;273;295;306;310;314;320;326;340;351;356;357;360;364;366;376;383;389;390;396;400;416;449;450;499;510;511;512;531;538;554;559;570;575;577;606;609;645;655;662
CCLE Hybrid Capture Mutations	FLT1	FLT1_p._ANY_CODING_MUTATION	4;33;61;70;92;99;102;128;130;132;135;136;141;144;150;183;185;187;189;199;213;218;224;226;244;247;272;305;364;380;387;416;424;437;498;499;500;529;530;535;538;651
CCLE Hybrid Capture Mutations	FLT3	FLT3_p._ANY_CODING_MUTATION	10;31;111;126;128;129;131;136;192;195;203;213;218;249;253;260;266;273;275;312;344;350;364;443;463;498;531;535
CCLE Hybrid Capture Mutations	FLT4	FLT4_p._ANY_CODING_MUTATION	116;129;137;143;144;146;156;174;192;193;195;198;199;202;203;205;208;246;265;275;318;332;344;365;377;392;433;500;531;542;556;570;603
CCLE Hybrid Capture Mutations	FMN2	FMN2_p._ANY_CODING_MUTATION	8;9;12;16;20;24;29;31;33;34;37;38;41;43;52;54;60;63;64;72;75;76;80;90;92;93;99;101;105;110;115;116;120;122;124;128;129;130;131;132;133;135;136;141;144;146;148;156;161;165;167;168;169;177;184;185;186;187;189;191;193;195;196;198;202;208;209;213;215;216;218;221;243;252;253;254;255;258;259;265;266;271;272;280;284;288;301;307;308;311;315;316;318;319;321;331;334;339;340;343;348;349;350;351;356;357;359;…
CCLE Hybrid Capture Mutations	FMN2	FMN2_p.G59	34;410;438;458;479;615
CCLE Hybrid Capture Mutations	FMN2	FMN2_p.G59del	34;410;438;458;479;615
CCLE Hybrid Capture Mutations	FMN2	FMN2_p.G59del1	34;410;438;458;479;615
CCLE Hybrid Capture Mutations	FMN2	FMN2_p.P1096	9;184;196
CCLE Hybrid Capture Mutations	FMN2	FMN2_p.P1096del	9;184;196
CCLE Hybrid Capture Mutations	FMN2	FMN2_p.P1096del11	9;184;196
CCLE Hybrid Capture Mutations	FMN2	FMN2_p.P939	8;12;16;20;31;34;37;38;41;54;63;64;72;75;76;80;90;92;93;99;101;105;110;116;120;122;128;133;136;148;165;167;168;177;186;187;193;208;209;213;218;221;243;252;253;254;255;258;271;272;280;284;307;308;311;315;316;318;319;334;348;350;368;374;380;383;385;387;399;404;408;417;419;423;438;439;445;453;459;461;467;468;469;471;479;489;491;496;504;505;512;519;527;534;536;541;545;550;551;552;553;561;579;580;601;…
CCLE Hybrid Capture Mutations	FMN2	FMN2_p.P939del	8;12;16;20;31;34;37;38;41;54;63;64;72;75;76;80;90;92;93;99;101;105;110;116;120;122;128;133;136;148;165;167;168;177;186;187;193;208;209;213;218;221;243;252;253;254;255;258;271;272;280;284;307;308;311;315;316;318;319;334;348;350;368;374;380;383;385;387;399;404;408;417;419;423;438;439;445;453;459;461;467;468;469;471;479;489;491;496;504;505;512;519;527;534;536;541;545;550;551;552;553;561;579;580;601;…
CCLE Hybrid Capture Mutations	FMN2	FMN2_p.P939del11	8;12;16;20;31;34;37;38;41;54;63;64;72;75;76;80;90;92;93;99;101;105;110;116;120;122;128;133;136;148;165;167;168;177;186;187;193;208;209;213;218;221;243;252;253;254;255;258;271;272;280;284;307;308;311;315;316;318;319;334;348;350;368;374;380;383;385;387;399;404;408;417;419;423;438;439;445;453;459;461;467;468;469;471;479;489;491;496;504;505;512;519;527;534;536;541;545;550;551;552;553;561;579;580;601;…
CCLE Hybrid Capture Mutations	FMN2	FMN2_p.P948	198;343;357;411;432
CCLE Hybrid Capture Mutations	FMN2	FMN2_p.P948del	198;343;357;411;432
CCLE Hybrid Capture Mutations	FMN2	FMN2_p.P948del11	198;343;357;411;432
CCLE Hybrid Capture Mutations	FMO4	FMO4_p._ANY_CODING_MUTATION	7;15;101;126;130;134;137;204;232;264;279;323;364;370;464;505;529;530;571;580
CCLE Hybrid Capture Mutations	FN1	FN1_p._ANY_CODING_MUTATION	51;53;77;86;110;128;130;131;132;135;136;137;138;141;144;146;150;156;158;189;192;193;195;197;198;199;209;213;218;219;220;230;239;241;273;308;310;350;372;391;399;404;416;436;437;441;444;464;471;478;484;498;500;505;507;533;553;569;575;580;598;605;611;613;635;641;642
CCLE Hybrid Capture Mutations	FN1	FN1_p.I594	110;239;391
CCLE Hybrid Capture Mutations	FN1	FN1_p.I594T	110;239;391
CCLE Hybrid Capture Mutations	FNBP1	FNBP1_p._ANY_CODING_MUTATION	7;21;68;126;128;131;132;137;138;144;156;195;215;218;219;221;237;238;368;390;418;451;483;513;547;645
CCLE Hybrid Capture Mutations	FNTA	FNTA_p._ANY_CODING_MUTATION	129;132;320;390;429;575;604;608;640
CCLE Hybrid Capture Mutations	FOS	FOS_p._ANY_CODING_MUTATION	132;192;202;350;618
CCLE Hybrid Capture Mutations	FOXE1	FOXE1_p._ANY_CODING_MUTATION	193;221;368
CCLE Hybrid Capture Mutations	FOXO1	FOXO1_p._ANY_CODING_MUTATION	42;128;132;136;192;200;327;423;449
CCLE Hybrid Capture Mutations	FOXO3	FOXO3_p._ANY_CODING_MUTATION	58;128;129;135;144;203;210;213;221;380;437;465;491;573;584;598
CCLE Hybrid Capture Mutations	FOXO4	FOXO4_p._ANY_CODING_MUTATION	126;129;130;131;135;189;210;250;336;409;560;571;644
CCLE Hybrid Capture Mutations	FOXO4	FOXO4_p.L399	126;129;135;189;210;571
CCLE Hybrid Capture Mutations	FOXO4	FOXO4_p.L399fs	126;129;135;189;210;571
CCLE Hybrid Capture Mutations	FOXP1	FOXP1_p._ANY_CODING_MUTATION	131;136;138;183;193;215;264;313;498;564;571;589;613;647;654
CCLE Hybrid Capture Mutations	FRK	FRK_p._ANY_CODING_MUTATION	108;128;132;148;157;189;195;229;342;351;367;378;424;538;617
CCLE Hybrid Capture Mutations	FRS2	FRS2_p._ANY_CODING_MUTATION	130;131;132;141;176;221;418;575;606;621;644
CCLE Hybrid Capture Mutations	FSCB	FSCB_p._ANY_CODING_MUTATION	13;24;40;132;136;156;157;189;198;210;213;216;271;278;285;310;344;350;384;415;416;521;577;630
CCLE Hybrid Capture Mutations	FSTL3	FSTL3_p._ANY_CODING_MUTATION	85;136;213;598
CCLE Hybrid Capture Mutations	FURIN	FURIN_p._ANY_CODING_MUTATION	33;132;148;157;178;192;193;199;213;232;239;252;312;358;622
CCLE Hybrid Capture Mutations	FUS	FUS_p._ANY_CODING_MUTATION	89;135;136;138;139;183;184;189;228;253;279;298;373;387
CCLE Hybrid Capture Mutations	FUS	FUS_p.R384	138;253;298
CCLE Hybrid Capture Mutations	FUS	FUS_p.R384H	138;253;298
CCLE Hybrid Capture Mutations	FYN	FYN_p._ANY_CODING_MUTATION	51;57;124;130;131;135;150;155;193;195;213;218;226;351;437;531;567
CCLE Hybrid Capture Mutations	FZD1	FZD1_p._ANY_CODING_MUTATION	6;10;34;35;48;49;53;84;99;124;125;126;128;130;132;135;144;146;157;171;185;193;195;199;202;213;218;219;220;221;237;272;306;311;323;324;329;347;350;352;357;364;369;381;412;424;429;430;432;433;458;490;491;502;510;527;529;532;535;542;551;561;575;576;604;610;626;630;635;643;645;651;664
CCLE Hybrid Capture Mutations	FZD1	FZD1_p.X93	6;34;35;48;49;84;99;125;135;146;157;185;195;199;237;306;311;323;324;329;347;350;352;364;381;412;430;432;433;458;491;502;510;527;529;532;535;542;551;576;604;610;626;630;645
CCLE Hybrid Capture Mutations	FZD1	FZD1_p.X93ins	6;34;35;48;49;84;99;125;135;146;157;185;195;199;237;306;311;323;324;329;347;350;352;364;381;412;430;432;433;458;491;502;510;527;529;532;535;542;551;576;604;610;626;630;645
CCLE Hybrid Capture Mutations	FZD1	FZD1_p.X93insP	6;34;35;48;49;84;99;125;135;146;157;185;195;199;237;306;311;323;324;329;347;350;352;364;381;412;430;432;433;458;491;502;510;527;529;532;535;542;551;576;604;610;626;630;645
CCLE Hybrid Capture Mutations	GAB1	GAB1_p._ANY_CODING_MUTATION	7;38;56;72;109;126;132;133;144;189;193;291;313;321;364;369;388;403;430;464;500;538;613
CCLE Hybrid Capture Mutations	GAB1	GAB1_p.L270	7;291;388
CCLE Hybrid Capture Mutations	GAB1	GAB1_p.L270S	7;291;388
CCLE Hybrid Capture Mutations	GADD45A	GADD45A_p._ANY_CODING_MUTATION	135;226;334
CCLE Hybrid Capture Mutations	GAK	GAK_p._ANY_CODING_MUTATION	98;126;128;129;133;135;141;144;195;213;312;336;344;356;377;380;383;385;420;538;615;623;653
CCLE Hybrid Capture Mutations	GAS7	GAS7_p._ANY_CODING_MUTATION	112;124;126;129;218;236;249;255;274;313;359;367;369;403;443;499;513;575;598
CCLE Hybrid Capture Mutations	GATA1	GATA1_p._ANY_CODING_MUTATION	16;115;169;183;189;329;385;532;571;581;596;648
CCLE Hybrid Capture Mutations	GATA2	GATA2_p._ANY_CODING_MUTATION	53;128;129;144;182;202;213;218;268;323;386;449;537
CCLE Hybrid Capture Mutations	GCK	GCK_p._ANY_CODING_MUTATION	135;136;195;210;213;237;285;304;317;340;387;498;500;529;530;609;613;644;648
CCLE Hybrid Capture Mutations	GCNT2	GCNT2_p._ANY_CODING_MUTATION	53;112;128;132;193;218;246;367;488
CCLE Hybrid Capture Mutations	GH1	GH1_p._ANY_CODING_MUTATION	35;102;129;136;157;218;340;366;368;392;478;554;568
CCLE Hybrid Capture Mutations	GH1	GH1_p.G157	129;218;392;568
CCLE Hybrid Capture Mutations	GH1	GH1_p.G157D	129;218;392;568
CCLE Hybrid Capture Mutations	GHR	GHR_p._ANY_CODING_MUTATION	16;40;53;68;102;103;128;133;192;195;196;213;218;227;260;268;305;312;317;336;344;350;351;356;367;382;499;510;531;535;537;538
CCLE Hybrid Capture Mutations	GLG1	GLG1_p._ANY_CODING_MUTATION	53;98;128;129;130;131;132;136;138;144;189;192;193;197;199;213;220;221;259;268;312;313;332;346;357;461;500;613;617;644;664
CCLE Hybrid Capture Mutations	GLG1	GLG1_p.R394	130;131;199
CCLE Hybrid Capture Mutations	GLG1	GLG1_p.R413	128;213;644
CCLE Hybrid Capture Mutations	GLG1	GLG1_p.R413*	128;213;644
CCLE Hybrid Capture Mutations	GLI1	GLI1_p._ANY_CODING_MUTATION	8;38;73;95;96;124;126;128;137;139;145;174;183;185;191;193;198;203;210;213;247;294;295;315;330;331;340;356;367;380;388;443;515;532;575;580;647;651;655
CCLE Hybrid Capture Mutations	GLI1	GLI1_p.W272	124;145;185;198;210
CCLE Hybrid Capture Mutations	GLI1	GLI1_p.W272fs	124;145;185;198;210
CCLE Hybrid Capture Mutations	GLI2	GLI2_p._ANY_CODING_MUTATION	16;23;49;60;124;129;130;131;132;138;139;141;144;145;183;189;193;201;213;218;225;235;264;268;311;313;333;348;351;353;361;364;368;369;393;396;416;531;538;549;571;575;596;599;609;653
CCLE Hybrid Capture Mutations	GLI3	GLI3_p._ANY_CODING_MUTATION	17;30;72;86;91;93;120;126;130;131;132;136;141;147;148;183;189;195;197;203;209;216;221;222;246;249;260;283;313;328;350;351;368;370;373;378;386;390;410;420;443;462;471;482;486;532;547;555;567;571;575;593;605;606;626;627;634;643
CCLE Hybrid Capture Mutations	GLI3	GLI3_p.A57	147;197;420;627
CCLE Hybrid Capture Mutations	GLI3	GLI3_p.A57T	147;197;420;627
CCLE Hybrid Capture Mutations	GLI3	GLI3_p.P1033	183;189;575
CCLE Hybrid Capture Mutations	GLI3	GLI3_p.P1033fs	183;189;575
CCLE Hybrid Capture Mutations	GLTSCR1	GLTSCR1_p._ANY_CODING_MUTATION	37;46;99;126;128;130;135;137;138;143;145;146;157;193;210;219;226;268;315;317;348;381;390;391;416;420;444;449;498;522;533;547;571;575;584;601;603;624;625;644;656;663
CCLE Hybrid Capture Mutations	GLTSCR1	GLTSCR1_p.P935	126;128;130;137;138;143;145;146;219;226;416;420;449;498
CCLE Hybrid Capture Mutations	GLTSCR1	GLTSCR1_p.P935fs	126;128;130;137;138;143;145;146;219;226;416;420;449;498
CCLE Hybrid Capture Mutations	GLYAT	GLYAT_p._ANY_CODING_MUTATION	15;129;195;210;218;320;349;364;474;499;564;567
CCLE Hybrid Capture Mutations	GLYATL2	GLYATL2_p._ANY_CODING_MUTATION	12;103;132;189;195;221;266;318;373;380;391;401;445;503;578;612;625
CCLE Hybrid Capture Mutations	GMPS	GMPS_p._ANY_CODING_MUTATION	61;128;132;145;146;189;199;218;286;335;344;350;584;585;658
CCLE Hybrid Capture Mutations	GNAQ	GNAQ_p._ANY_CODING_MUTATION	130;135;195;213;218;291;613
CCLE Hybrid Capture Mutations	GNAS	GNAS_p._ANY_CODING_MUTATION	115;124;125;128;129;135;136;138;141;142;144;145;184;186;187;189;192;193;195;198;203;211;213;218;221;226;236;244;259;268;278;288;308;342;351;364;380;424;425;463;499;500;538;551;554;576;584;613;616
CCLE Hybrid Capture Mutations	GNAS	GNAS_p.R844	198;211;244
CCLE Hybrid Capture Mutations	GOLGA5	GOLGA5_p._ANY_CODING_MUTATION	15;18;132;135;157;191;196;213;218;219;239;251;275;296;305;311;329;382;499;521;594;632;634
CCLE Hybrid Capture Mutations	GOLGA5	GOLGA5_p.L556	15;135;157;251;296;382;521
CCLE Hybrid Capture Mutations	GOLGA5	GOLGA5_p.L556F	15;135;157;251;296;382;521
CCLE Hybrid Capture Mutations	GOLGA5	GOLGA5_p.S460	18;632;634
CCLE Hybrid Capture Mutations	GOLGA5	GOLGA5_p.S460R	18;632;634
CCLE Hybrid Capture Mutations	GOLPH3	GOLPH3_p._ANY_CODING_MUTATION	141;199;213;218
CCLE Hybrid Capture Mutations	GOPC	GOPC_p._ANY_CODING_MUTATION	13;52;71;198;212;213;218;361;364;395;573;634
CCLE Hybrid Capture Mutations	GOPC	GOPC_p.Y462	13;52;71;395;573
CCLE Hybrid Capture Mutations	GOPC	GOPC_p.Y462del	13;52;71;395;573
CCLE Hybrid Capture Mutations	GOPC	GOPC_p.Y462del1	13;52;71;395;573
CCLE Hybrid Capture Mutations	GPC3	GPC3_p._ANY_CODING_MUTATION	33;126;132;141;218;275;310;340;350;421;443;474;500;538;585;600;613;644
CCLE Hybrid Capture Mutations	GPHN	GPHN_p._ANY_CODING_MUTATION	130;132;138;141;157;189;195;213;321;351;415;456;482;538;554;556;613;644
CCLE Hybrid Capture Mutations	GPR112	GPR112_p.D34	189;226;575
CCLE Hybrid Capture Mutations	GPR112	GPR112_p.D34fs	189;226;575
CCLE Hybrid Capture Mutations	GPR112	GPR112_p.P1517	111;150;586
CCLE Hybrid Capture Mutations	GPR112	GPR112_p.P1517S	111;150;586
CCLE Hybrid Capture Mutations	GPR112	GPR112_p.S2274	114;138;141
CCLE Hybrid Capture Mutations	GPR112	GPR112_p.S2274L	114;138;141
CCLE Hybrid Capture Mutations	GPR119	GPR119_p._ANY_CODING_MUTATION	39;137;146;197;198;312;531
CCLE Hybrid Capture Mutations	GPR141	GPR141_p._ANY_CODING_MUTATION	53;81;132;133;138;167;191;206;213;219;276;282;348;380;383;385;398;531;541;551;559
CCLE Hybrid Capture Mutations	GPR183	GPR183_p._ANY_CODING_MUTATION	131;183;213;272;340;341;571;616
CCLE Hybrid Capture Mutations	GPR87	GPR87_p._ANY_CODING_MUTATION	130;131;135;195;198;213;216;218;219;348;444;474;499;603
CCLE Hybrid Capture Mutations	GRAMD1B	GRAMD1B_p._ANY_CODING_MUTATION	90;126;128;132;135;139;141;145;182;212;213;216;218;224;259;305;348;356;364;383;420;437;444;499;500;643;644
CCLE Hybrid Capture Mutations	GRB2	GRB2_p._ANY_CODING_MUTATION	146;219;512;559
CCLE Hybrid Capture Mutations	GRB7	GRB7_p._ANY_CODING_MUTATION	7;17;128;135;164;169;189;249;259;328;363;369;500;548;590;630
CCLE Hybrid Capture Mutations	GRIA3	GRIA3_p._ANY_CODING_MUTATION	23;35;99;132;135;136;141;145;157;177;203;213;219;225;226;342;351;356;364;367;389;420;453;460;471;512;541
CCLE Hybrid Capture Mutations	GRIK1	GRIK1_p._ANY_CODING_MUTATION	17;51;73;115;132;144;195;203;221;227;267;268;271;285;291;315;319;333;383;439;444;610;613;639
CCLE Hybrid Capture Mutations	GRIN2A	GRIN2A_p._ANY_CODING_MUTATION	38;39;48;62;68;102;128;129;130;132;136;137;139;141;144;183;189;195;198;202;205;207;215;218;221;265;268;273;276;281;283;305;310;312;313;326;329;341;348;351;359;396;401;416;449;474;510;512;526;537;538;569;571;575;576;613;654
CCLE Hybrid Capture Mutations	GRIN2B	GRIN2B_p._ANY_CODING_MUTATION	71;102;127;129;132;136;137;141;143;144;148;150;161;183;193;195;198;202;203;213;216;218;219;220;228;269;273;283;286;295;299;313;318;325;328;343;347;350;358;360;361;364;382;390;398;447;465;477;510;513;520;531;538;540;559;575;597;621;633;644
CCLE Hybrid Capture Mutations	GRK1	GRK1_p._ANY_CODING_MUTATION	71;85;128;131;221;268;275;330;364;369;598
CCLE Hybrid Capture Mutations	GRK4	GRK4_p._ANY_CODING_MUTATION	127;141;146;157;161;192;198;210;215;218;300;377;480;516;613;644
CCLE Hybrid Capture Mutations	GRK4	GRK4_p.Q219	146;192;198
CCLE Hybrid Capture Mutations	GRK4	GRK4_p.Q219fs	146;192;198
CCLE Hybrid Capture Mutations	GRK5	GRK5_p._ANY_CODING_MUTATION	15;129;130;131;210;213;218;326;372;538;576;613;644
CCLE Hybrid Capture Mutations	GRK6	GRK6_p._ANY_CODING_MUTATION	2;53;128;150;210;213;237;300;370;643
CCLE Hybrid Capture Mutations	GRK7	GRK7_p._ANY_CODING_MUTATION	128;129;139;156;199;210;213;304;305;313;315;349;350;388;391;441;587;594;619;645
CCLE Hybrid Capture Mutations	GRK7	GRK7_p.G201	129;156;388
CCLE Hybrid Capture Mutations	GRK7	GRK7_p.G201fs	129;156;388
CCLE Hybrid Capture Mutations	GSG2	GSG2_p._ANY_CODING_MUTATION	124;132;135;136;198;203;213;218;249;305;313;392;444;509;545
CCLE Hybrid Capture Mutations	GSK3A	GSK3A_p._ANY_CODING_MUTATION	135;183;193;199;498
CCLE Hybrid Capture Mutations	GSK3B	GSK3B_p._ANY_CODING_MUTATION	19;31;132;141;198;202;211;255;580;613
CCLE Hybrid Capture Mutations	GTSE1	GTSE1_p._ANY_CODING_MUTATION	43;45;68;135;145;157;192;199;203;215;246;300;315;378;429;526;568;577;656
CCLE Hybrid Capture Mutations	GUCY1A2	GUCY1A2_p._ANY_CODING_MUTATION	132;135;136;189;199;218;226;267;305;336;342;344;349;351;364;368;369;484;499;547;554;558;613;644
CCLE Hybrid Capture Mutations	GUCY2C	GUCY2C_p._ANY_CODING_MUTATION	9;37;73;124;131;132;136;141;145;183;189;193;195;215;294;315;361;362;391;415;418;449;477;498;510;537;548;554;558;569;624;627;650;654
CCLE Hybrid Capture Mutations	GUCY2D	GUCY2D_p._ANY_CODING_MUTATION	128;132;137;153;193;206;211;213;218;305;321;340;392;538;590
CCLE Hybrid Capture Mutations	GUCY2F	GUCY2F_p._ANY_CODING_MUTATION	8;36;75;137;146;150;158;165;189;203;205;213;214;218;265;284;332;340;344;350;358;384;420;427;444;512;517;538;624;639
CCLE Hybrid Capture Mutations	GUCY2F	GUCY2F_p.E929	146;214;639
CCLE Hybrid Capture Mutations	GUCY2F	GUCY2F_p.E929splice	146;214;639
CCLE Hybrid Capture Mutations	HAPLN1	HAPLN1_p._ANY_CODING_MUTATION	4;126;128;129;145;157;195;198;202;210;213;218;219;317;348;352;372;465;499;541;579
CCLE Hybrid Capture Mutations	HBD	HBD_p._ANY_CODING_MUTATION	132;268;276;303;538
CCLE Hybrid Capture Mutations	HCK	HCK_p._ANY_CODING_MUTATION	132;145;150;197;203;215;305;313;349;420;469;483;592
CCLE Hybrid Capture Mutations	HDAC1	HDAC1_p._ANY_CODING_MUTATION	129;136;137;150;185;198;213;218;226;239;500;543;613
CCLE Hybrid Capture Mutations	HDAC2	HDAC2_p._ANY_CODING_MUTATION	84;86;124;126;128;135;136;137;141;143;145;146;157;198;200;203;210;213;218;219;220;226;268;329;333;342;410;416;435;437;500;515;571;575;582;590;607
CCLE Hybrid Capture Mutations	HDAC2	HDAC2_p.K105	124;128;135;137;145;157;210;219;226;268;416;437;571;575
CCLE Hybrid Capture Mutations	HDAC2	HDAC2_p.K105fs	124;128;135;137;145;157;210;219;226;268;416;437;571;575
CCLE Hybrid Capture Mutations	HDAC2	HDAC2_p.S81	220;333;410
CCLE Hybrid Capture Mutations	HDAC2	HDAC2_p.S81del	220;333;410
CCLE Hybrid Capture Mutations	HDAC2	HDAC2_p.S81del1	220;333;410
CCLE Hybrid Capture Mutations	HDAC2	HDAC2_p.X81	84;86;143;200;342;435;590;607
CCLE Hybrid Capture Mutations	HDAC2	HDAC2_p.X81ins	84;86;143;200;342;435;590;607
CCLE Hybrid Capture Mutations	HDAC2	HDAC2_p.X81insS	84;86;143;200;342;435;590;607
CCLE Hybrid Capture Mutations	HDAC3	HDAC3_p._ANY_CODING_MUTATION	136;177;189;195;203;267;364;377;394;439;636
CCLE Hybrid Capture Mutations	HDAC4	HDAC4_p._ANY_CODING_MUTATION	3;23;44;48;87;115;124;128;133;135;189;193;198;199;204;255;303;308;328;348;364;498;500;538;539;575;584;661;663
CCLE Hybrid Capture Mutations	HDAC4	HDAC4_p.P901	128;135;198;498;500;538
CCLE Hybrid Capture Mutations	HDAC4	HDAC4_p.P901fs	128;135;198;498;500
CCLE Hybrid Capture Mutations	HDAC6	HDAC6_p._ANY_CODING_MUTATION	70;75;80;128;132;133;136;139;157;183;219;226;303;348;383;387;391;412;416;417;510;537;575;579;627
CCLE Hybrid Capture Mutations	HDAC8	HDAC8_p._ANY_CODING_MUTATION	56;203;264;313;362;380;420;499;613;644
CCLE Hybrid Capture Mutations	HDLBP	HDLBP_p._ANY_CODING_MUTATION	27;53;126;128;129;131;135;136;137;139;141;142;145;192;197;211;213;254;273;380;404;467;489;498;500;501;584;596;613;644
CCLE Hybrid Capture Mutations	HECW1	HECW1_p._ANY_CODING_MUTATION	69;103;115;128;130;131;132;133;135;136;141;183;185;193;197;198;199;202;204;210;211;213;218;219;228;255;279;282;296;317;338;344;349;351;356;359;362;364;370;384;398;416;420;454;513;538;541;567;571;589;609;623
CCLE Hybrid Capture Mutations	HEPH	HEPH_p._ANY_CODING_MUTATION	38;72;74;79;105;116;124;127;132;133;135;141;145;150;157;172;184;189;203;219;221;266;293;295;310;311;315;326;332;338;341;350;351;373;377;388;416;418;420;489;513;538;542;543;551;553;554;582;621;661
CCLE Hybrid Capture Mutations	HERC2	HERC2_p._ANY_CODING_MUTATION	2;6;16;29;30;38;40;53;68;69;72;73;81;89;91;121;128;129;130;131;132;135;136;137;139;141;144;145;146;150;157;158;173;182;183;185;189;191;192;193;195;203;204;208;210;213;215;218;220;221;226;227;244;245;249;251;277;285;292;293;301;308;311;312;326;340;341;342;343;344;351;365;368;376;379;383;387;388;391;403;420;435;437;444;455;456;498;499;500;507;523;533;535;538;548;571;579;583;591;592;595;621;622;627;…
CCLE Hybrid Capture Mutations	HERC2	HERC2_p.R2126	132;292;388;638
CCLE Hybrid Capture Mutations	HERC2	HERC2_p.R2126L	132;292;388;638
CCLE Hybrid Capture Mutations	HGF	HGF_p._ANY_CODING_MUTATION	113;128;132;141;144;146;156;189;195;220;245;263;264;268;328;330;344;357;367;381;386;392;405;424;499;500;507;511;538;550;552;578;592;604;608;618;643
CCLE Hybrid Capture Mutations	HIF1A	HIF1A_p._ANY_CODING_MUTATION	20;57;126;127;128;132;136;144;172;193;197;213;214;332;357;358;364;373;386;391;437;441;449;474;501;510;540;575;605;613;618;661
CCLE Hybrid Capture Mutations	HIP1	HIP1_p._ANY_CODING_MUTATION	18;31;132;135;143;195;198;203;213;224;229;253;258;325;374;408;449;499;500;556;576;579;609
CCLE Hybrid Capture Mutations	HIPK1	HIPK1_p._ANY_CODING_MUTATION	20;84;124;126;128;132;136;137;141;157;161;189;203;219;221;254;265;273;278;379;388;509;578;584;597;604;608;613;615;623;644
CCLE Hybrid Capture Mutations	HIPK2	HIPK2_p._ANY_CODING_MUTATION	53;56;78;126;127;128;132;135;141;192;193;195;202;203;300;319;344;425;498;512;538;548;638
CCLE Hybrid Capture Mutations	HIPK3	HIPK3_p._ANY_CODING_MUTATION	15;39;42;56;85;115;127;128;132;136;137;138;141;144;189;203;213;214;224;253;348;407;417;538;578;596;613;635
CCLE Hybrid Capture Mutations	HIPK4	HIPK4_p._ANY_CODING_MUTATION	2;54;183;196;213;221;268;306;320;325;372;376;500;607;631;639
CCLE Hybrid Capture Mutations	HLF	HLF_p._ANY_CODING_MUTATION	21;128;189;203;213;218;220;259;343;393;420;499
CCLE Hybrid Capture Mutations	HMMR	HMMR_p._ANY_CODING_MUTATION	67;124;128;129;132;133;138;141;142;144;145;146;150;157;183;185;189;203;210;219;240;248;350;403;416;420;455;517;575;583;584;592
CCLE Hybrid Capture Mutations	HMMR	HMMR_p.A664	67;133;146;248;403
CCLE Hybrid Capture Mutations	HMMR	HMMR_p.A664fs	67;133;146;248;403
CCLE Hybrid Capture Mutations	HMMR	HMMR_p.K665	124;129;144;145;150;157;183;185;189;210;416;420;584;592
CCLE Hybrid Capture Mutations	HMMR	HMMR_p.K665fs	124;129;144;145;150;157;183;185;189;210;416;420;584;592
CCLE Hybrid Capture Mutations	HNF1A	HNF1A_p._ANY_CODING_MUTATION	40;57;61;115;124;128;133;136;185;189;202;203;211;213;221;248;256;293;305;405;589
CCLE Hybrid Capture Mutations	HNF1A	HNF1A_p.G288	124;202;211
CCLE Hybrid Capture Mutations	HNF1A	HNF1A_p.G288fs	124;202;211
CCLE Hybrid Capture Mutations	HNF1A	HNF1A_p.P289	133;189;221
CCLE Hybrid Capture Mutations	HNF1A	HNF1A_p.P289fs	133;189;221
CCLE Hybrid Capture Mutations	HNF1B	HNF1B_p._ANY_CODING_MUTATION	126;135;157;213;332;351;374;392;420;469;547;572;605;613;621;657
CCLE Hybrid Capture Mutations	HNRNPA2B1	HNRNPA2B1_p._ANY_CODING_MUTATION	42;43;124;127;132;133;193;268;338;351;364;464;584;598
CCLE Hybrid Capture Mutations	HNRNPH1	HNRNPH1_p._ANY_CODING_MUTATION	126;128;144;189;195;213;218;257;286;317;367;389;409;571;592;613
CCLE Hybrid Capture Mutations	HNRNPH1	HNRNPH1_p.S310	126;189;213
CCLE Hybrid Capture Mutations	HNRNPH1	HNRNPH1_p.S310fs	126;189;213
CCLE Hybrid Capture Mutations	HORMAD1	HORMAD1_p._ANY_CODING_MUTATION	37;126;128;132;133;193;202;213;226;370;416;513;535;562
CCLE Hybrid Capture Mutations	HOXA11	HOXA11_p._ANY_CODING_MUTATION	129;213;590;592
CCLE Hybrid Capture Mutations	HOXA13	HOXA13_p._ANY_CODING_MUTATION	40;136;213;256;266;294;650
CCLE Hybrid Capture Mutations	HOXA9	HOXA9_p._ANY_CODING_MUTATION	135;501;644
CCLE Hybrid Capture Mutations	HOXC11	HOXC11_p._ANY_CODING_MUTATION	57;126;132;135;195;213;226;315;351
CCLE Hybrid Capture Mutations	HOXC13	HOXC13_p._ANY_CODING_MUTATION	132;139;193;268;380;403;584;595;637
CCLE Hybrid Capture Mutations	HOXC13	HOXC13_p.R291	403;584;595
CCLE Hybrid Capture Mutations	HOXC13	HOXC13_p.R291W	403;584;595
CCLE Hybrid Capture Mutations	HOXD10	HOXD10_p._ANY_CODING_MUTATION	58;82;108;126;132;141;196;198;202;216;218;260;301;310;325;356;554;575
CCLE Hybrid Capture Mutations	HOXD11	HOXD11_p._ANY_CODING_MUTATION	130;131;198;276;294;313;342;443;584;644
CCLE Hybrid Capture Mutations	HOXD13	HOXD13_p._ANY_CODING_MUTATION	128;136;193;333;344;351;561;584;594
CCLE Hybrid Capture Mutations	HRAS	HRAS_p._ANY_CODING_MUTATION	50;74;124;131;145;213;292;328;389;509;537;571;572;631
CCLE Hybrid Capture Mutations	HRAS	HRAS_p.Q61	145;292;328;389;509
CCLE Hybrid Capture Mutations	HRAS	HRAS_p.Q61L	292;328;389;509
CCLE Hybrid Capture Mutations	HSF1	HSF1_p._ANY_CODING_MUTATION	137;157;199;317;340;417;425;444;554
CCLE Hybrid Capture Mutations	HSP90AA1	HSP90AA1_p._ANY_CODING_MUTATION	6;50;126;127;143;196;199;210;280;362;366;373;480;541;597;605;610;637;643
CCLE Hybrid Capture Mutations	HSP90AA1	HSP90AA1_p.K363	280;373;597
CCLE Hybrid Capture Mutations	HSP90AA1	HSP90AA1_p.K363del	280;373;597
CCLE Hybrid Capture Mutations	HSP90AA1	HSP90AA1_p.K363del1	280;373;597
CCLE Hybrid Capture Mutations	HSP90AB1	HSP90AB1_p._ANY_CODING_MUTATION	117;129;132;133;135;144;146;150;185;198;213;215;218;245;247;341;388;416;444;449;499;555;575;587;655
CCLE Hybrid Capture Mutations	HSP90B1	HSP90B1_p._ANY_CODING_MUTATION	2;4;10;14;15;16;31;35;37;39;40;42;46;48;56;62;78;80;90;92;102;109;113;116;126;128;132;133;134;135;136;138;139;141;142;150;153;155;156;157;158;161;163;166;170;174;176;177;178;182;183;187;189;191;192;195;197;206;209;214;215;218;228;232;235;238;239;241;243;244;250;269;272;281;284;301;314;323;327;332;339;350;351;352;359;371;373;374;375;376;387;392;400;401;421;422;432;436;437;438;440;441;450;451;464;4…
CCLE Hybrid Capture Mutations	HSP90B1	HSP90B1_p.E791	2;4;10;14;15;16;31;35;37;39;42;46;48;56;62;80;90;92;102;109;113;116;126;128;132;134;135;138;139;141;142;150;153;155;156;157;161;163;166;170;174;176;177;178;182;183;187;189;191;192;197;206;209;214;215;228;232;235;238;239;241;243;244;250;269;272;281;284;301;314;327;332;339;350;352;359;371;373;374;375;376;387;392;400;401;421;422;432;436;437;438;440;441;450;451;464;469;474;477;487;488;489;508;513;517…
CCLE Hybrid Capture Mutations	HSP90B1	HSP90B1_p.E791del	2;4;10;14;15;16;31;35;37;39;42;46;48;56;62;80;90;92;102;109;113;116;126;128;132;134;135;138;139;141;142;150;153;155;156;157;161;163;166;170;174;176;177;178;182;183;187;189;191;192;197;206;209;214;215;228;232;235;238;239;241;243;244;250;269;272;281;284;301;314;327;332;339;350;352;359;371;373;374;375;376;387;392;400;401;421;422;432;436;437;438;440;441;450;451;464;469;474;477;487;488;489;508;513;517…
CCLE Hybrid Capture Mutations	HSP90B1	HSP90B1_p.E791del1	2;4;10;14;15;16;31;35;37;39;42;46;48;56;62;80;90;92;102;109;113;116;126;128;132;134;135;138;139;141;142;150;153;155;156;157;161;163;166;170;174;176;177;178;182;183;187;189;191;192;197;206;209;214;215;228;232;235;238;239;241;243;244;250;269;272;281;284;301;314;327;332;339;350;352;359;371;373;374;375;376;387;392;400;401;421;422;432;436;437;438;440;441;450;451;464;469;474;477;487;488;489;508;513;517…
CCLE Hybrid Capture Mutations	HSPA4	HSPA4_p._ANY_CODING_MUTATION	49;126;132;157;218;221;320;508;520;595;644
CCLE Hybrid Capture Mutations	HSPB1	HSPB1_p._ANY_CODING_MUTATION	103;143;196;213;295;538
CCLE Hybrid Capture Mutations	HSPB8	HSPB8_p._ANY_CODING_MUTATION	50;189;219;339;390;412;420;498;513
CCLE Hybrid Capture Mutations	HUNK	HUNK_p._ANY_CODING_MUTATION	130;131;136;185;189;198;199;202;213;218;219;268;304;339;356;427;432;437;498;538
CCLE Hybrid Capture Mutations	HUNK	HUNK_p.R660	130;131;213
CCLE Hybrid Capture Mutations	HUNK	HUNK_p.R660*	130;131;213
CCLE Hybrid Capture Mutations	ICAM1	ICAM1_p._ANY_CODING_MUTATION	113;124;136;189;498;554
CCLE Hybrid Capture Mutations	ICK	ICK_p._ANY_CODING_MUTATION	1;51;105;126;130;131;132;164;219;295;317;320;321;365;377;381;413;424;433;437;582;613
CCLE Hybrid Capture Mutations	ICK	ICK_p.P369	1;164;320;321;365;433;613
CCLE Hybrid Capture Mutations	ICK	ICK_p.P369del	1;164;320;321;365;433;613
CCLE Hybrid Capture Mutations	ICK	ICK_p.P369del4	1;164;320;321;365;433;613
CCLE Hybrid Capture Mutations	ID1	ID1_p._ANY_CODING_MUTATION	72;135;153;321;340;369;664
CCLE Hybrid Capture Mutations	ID1	ID1_p.P118	72;153;321
CCLE Hybrid Capture Mutations	ID1	ID1_p.P118L	72;153;321
CCLE Hybrid Capture Mutations	IDH1	IDH1_p._ANY_CODING_MUTATION	17;26;126;128;137;192;193;199;219;220;417;561
CCLE Hybrid Capture Mutations	IDH1	IDH1_p.I5	137;199;219
CCLE Hybrid Capture Mutations	IDH1	IDH1_p.I5fs	137;199;219
CCLE Hybrid Capture Mutations	IDH2	IDH2_p._ANY_CODING_MUTATION	36;114;137;138;145;210;213;367;633
CCLE Hybrid Capture Mutations	IFNA2	IFNA2_p._ANY_CODING_MUTATION	132;138;213;218;221;344;617
CCLE Hybrid Capture Mutations	IFNB1	IFNB1_p._ANY_CODING_MUTATION	128;198;315;493;535;542
CCLE Hybrid Capture Mutations	IFNG	IFNG_p._ANY_CODING_MUTATION	77;98;141;195;210
CCLE Hybrid Capture Mutations	IGF1R	IGF1R_p._ANY_CODING_MUTATION	12;17;126;127;128;135;138;143;146;193;203;213;218;226;251;252;259;331;358;368;538;644
CCLE Hybrid Capture Mutations	IGFBP5	IGFBP5_p._ANY_CODING_MUTATION	185;215;338;410
CCLE Hybrid Capture Mutations	IKBKB	IKBKB_p._ANY_CODING_MUTATION	53;58;128;135;139;189;195;214;221;245;250;320;583;584;596;601;640;651
CCLE Hybrid Capture Mutations	IKBKB	IKBKB_p.A710	214;221;250
CCLE Hybrid Capture Mutations	IKBKB	IKBKB_p.A710T	214;221;250
CCLE Hybrid Capture Mutations	IKBKE	IKBKE_p._ANY_CODING_MUTATION	38;49;72;124;126;136;150;170;189;193;213;219;280;357;538;573;580;616
CCLE Hybrid Capture Mutations	IKZF1	IKZF1_p._ANY_CODING_MUTATION	98;124;128;198;203;213;214;221;226;278;342;351;364;368;373;408;453;652
CCLE Hybrid Capture Mutations	IKZF3	IKZF3_p._ANY_CODING_MUTATION	27;69;128;132;135;157;189;193;213;218;219;313;325;329;332;374;380;575
CCLE Hybrid Capture Mutations	IL17RD	IL17RD_p._ANY_CODING_MUTATION	132;137;156;182;195;202;210;218;219;246;294;336;370;391;445;532;541;569;611;624
CCLE Hybrid Capture Mutations	IL1A	IL1A_p._ANY_CODING_MUTATION	158;189;193;218;379;498;501
CCLE Hybrid Capture Mutations	IL1B	IL1B_p._ANY_CODING_MUTATION	86;136;144;195;208;218;423;439;447;568
CCLE Hybrid Capture Mutations	IL1R1	IL1R1_p._ANY_CODING_MUTATION	129;132;133;178;195;218;221;226;227;348;375;560
CCLE Hybrid Capture Mutations	IL1R2	IL1R2_p._ANY_CODING_MUTATION	49;126;128;183;189;315;325;340;356;358;372;397;515;538;599;626;644
CCLE Hybrid Capture Mutations	IL1R2	IL1R2_p.R64	372;397;515
CCLE Hybrid Capture Mutations	IL1RAP	IL1RAP_p._ANY_CODING_MUTATION	131;132;134;144;202;215;218;220;305;408;498;538;547;663
CCLE Hybrid Capture Mutations	IL1RN	IL1RN_p._ANY_CODING_MUTATION	113;180;215;438
CCLE Hybrid Capture Mutations	IL2	IL2_p._ANY_CODING_MUTATION	53;132;269;498;591
CCLE Hybrid Capture Mutations	IL21R	IL21R_p._ANY_CODING_MUTATION	23;98;126;130;132;133;135;139;185;210;255;305;348;415;440;449;464;498;513;535;538;583
CCLE Hybrid Capture Mutations	IL21R	IL21R_p.R139	23;133;135;440;464
CCLE Hybrid Capture Mutations	IL21R	IL21R_p.R139C	23;133;135;440;464
CCLE Hybrid Capture Mutations	IL2RA	IL2RA_p._ANY_CODING_MUTATION	132;192;213;325;356;365
CCLE Hybrid Capture Mutations	IL6ST	IL6ST_p._ANY_CODING_MUTATION	46;131;132;153;183;193;210;226;243;249;268;379;481;498;576;609;616;636;644;654
CCLE Hybrid Capture Mutations	ILK	ILK_p._ANY_CODING_MUTATION	8;132;135;226;364;420;488;498;657
CCLE Hybrid Capture Mutations	ING1	ING1_p._ANY_CODING_MUTATION	29;116;124;128;129;210;213;220;272;321;325;350;364;416;444;449
CCLE Hybrid Capture Mutations	INHBA	INHBA_p._ANY_CODING_MUTATION	100;136;137;189;195;197;213;236;307;319;325;348;358;367;452;459;482;531;533;593;603
CCLE Hybrid Capture Mutations	INPP4B	INPP4B_p._ANY_CODING_MUTATION	54;130;131;132;158;195;213;215;264;305;307;314;350;384;445;525;641;642
CCLE Hybrid Capture Mutations	INPP5D	INPP5D_p._ANY_CODING_MUTATION	7;126;128;132;163;189;199;213;221;226;239;260;280;291;347;350;351;374;408;505;513;517;535;625;641;642
CCLE Hybrid Capture Mutations	INSR	INSR_p._ANY_CODING_MUTATION	7;115;126;128;130;133;135;136;138;143;145;156;173;193;198;213;220;221;244;263;286;362;404;439;451;499;500;504;513;537;538;559;606
CCLE Hybrid Capture Mutations	INSRR	INSRR_p._ANY_CODING_MUTATION	10;30;43;92;98;128;130;132;137;144;164;189;193;195;202;213;215;232;249;252;324;332;344;348;356;358;383;399;444;449;452;499;512;513;540;541;547;571;590;613;619;653
CCLE Hybrid Capture Mutations	IRAK1	IRAK1_p._ANY_CODING_MUTATION	157;213;313;536
CCLE Hybrid Capture Mutations	IRAK2	IRAK2_p._ANY_CODING_MUTATION	128;132;139;143;156;161;183;238;266;445;498;509;521;647
CCLE Hybrid Capture Mutations	IRAK3	IRAK3_p._ANY_CODING_MUTATION	126;128;132;153;195;210;218;221;301;351;360;364;365;393;474;606;621
CCLE Hybrid Capture Mutations	IRAK4	IRAK4_p._ANY_CODING_MUTATION	69;128;132;141;189;203;205;213;235
CCLE Hybrid Capture Mutations	IRF4	IRF4_p._ANY_CODING_MUTATION	101;128;132;193;213;218;268;271;449;500;560;582;644
CCLE Hybrid Capture Mutations	IRS1	IRS1_p._ANY_CODING_MUTATION	40;44;68;111;128;129;133;135;136;145;183;189;193;197;199;200;202;210;213;226;247;268;305;317;340;350;364;379;399;443;500;554;575;593;650
CCLE Hybrid Capture Mutations	IRS1	IRS1_p.G597	44;128;129;133;135;145;183;202;210;500
CCLE Hybrid Capture Mutations	IRS1	IRS1_p.G597fs	44;128;129;133;135;145;183;202;210;500
CCLE Hybrid Capture Mutations	IRS2	IRS2_p._ANY_CODING_MUTATION	81;124;128;144;269;295;336;420;500
CCLE Hybrid Capture Mutations	ISG15	ISG15_p._ANY_CODING_MUTATION	141;192;227;254;404;564
CCLE Hybrid Capture Mutations	ITGA10	ITGA10_p._ANY_CODING_MUTATION	44;56;60;78;109;126;131;132;134;137;139;141;144;192;193;198;199;213;219;268;301;338;397;427;481;498;499;541;585;590;598;618
CCLE Hybrid Capture Mutations	ITGA10	ITGA10_p.G79	137;193;541
CCLE Hybrid Capture Mutations	ITGA10	ITGA10_p.G79fs	137;193;541
CCLE Hybrid Capture Mutations	ITGA5	ITGA5_p._ANY_CODING_MUTATION	75;131;133;137;177;189;193;203;213;226;254;307;325;332;378;549;551;554;598;647
CCLE Hybrid Capture Mutations	ITGA7	ITGA7_p._ANY_CODING_MUTATION	31;53;126;132;157;169;184;196;198;212;221;364;420;467;489;538;550;552;575;591;594;601;621;631
CCLE Hybrid Capture Mutations	ITGAV	ITGAV_p._ANY_CODING_MUTATION	34;40;70;128;132;135;141;143;144;145;150;193;197;209;213;233;251;276;301;327;352;364;369;376;381;504;512;576;596;615;619;627
CCLE Hybrid Capture Mutations	ITGB1	ITGB1_p._ANY_CODING_MUTATION	10;24;53;128;129;132;144;156;163;183;192;202;213;218;292;325;340;358;430;439;575;630
CCLE Hybrid Capture Mutations	ITGB4	ITGB4_p._ANY_CODING_MUTATION	2;10;51;70;82;96;115;124;128;130;134;136;137;145;146;166;171;183;195;197;199;202;206;210;213;219;221;240;244;284;288;340;348;351;357;395;396;398;432;483;494;500;517;538;571;575;584;600;644
CCLE Hybrid Capture Mutations	ITGB4	ITGB4_p.R791	82;115;395
CCLE Hybrid Capture Mutations	ITGB6	ITGB6_p._ANY_CODING_MUTATION	49;111;126;141;203;213;219;221;252;259;268;310;348;359;385;392;393;510;519;524;531
CCLE Hybrid Capture Mutations	ITGB6	ITGB6_p.L551	126;385;392
CCLE Hybrid Capture Mutations	ITGB6	ITGB6_p.L551F	126;385;392
CCLE Hybrid Capture Mutations	ITGB8	ITGB8_p._ANY_CODING_MUTATION	128;130;131;137;144;193;195;202;203;291;296;312;351;380;524;541;559;576;611;624;664
CCLE Hybrid Capture Mutations	ITIH6	ITIH6_p._ANY_CODING_MUTATION	28;41;99;111;126;127;130;146;148;150;169;185;189;193;218;230;239;260;265;295;305;310;315;320;339;342;378;401;403;459;479;537;538;567;573;575;576;613
CCLE Hybrid Capture Mutations	ITIH6	ITIH6_p.W359	169;265;315;459;613
CCLE Hybrid Capture Mutations	ITIH6	ITIH6_p.W359splice	169;265;315;459;613
CCLE Hybrid Capture Mutations	ITK	ITK_p._ANY_CODING_MUTATION	84;121;126;128;136;141;193;195;203;213;215;223;281;312;325;333;340;344;376;380;393;420;437;529;530;592;620
CCLE Hybrid Capture Mutations	ITPR1	ITPR1_p._ANY_CODING_MUTATION	53;79;93;98;99;126;128;130;131;132;133;135;136;138;145;157;189;193;195;198;209;213;218;219;220;259;268;273;275;283;348;388;391;420;423;430;449;466;492;494;510;513;527;531;538;556;576;606;611;644;645;647;650
CCLE Hybrid Capture Mutations	ITPR1	ITPR1_p.R1931	130;131;135
CCLE Hybrid Capture Mutations	JAG1	JAG1_p._ANY_CODING_MUTATION	128;129;131;132;135;138;139;144;161;199;202;203;210;213;218;221;251;254;260;314;359;367;498;575;584;616;643;644
CCLE Hybrid Capture Mutations	JAG2	JAG2_p._ANY_CODING_MUTATION	7;89;102;128;129;130;131;133;137;141;145;157;198;203;213;268;305;316;347;364;416;418;499;513;538;589
CCLE Hybrid Capture Mutations	JAK1	JAK1_p._ANY_CODING_MUTATION	44;96;108;126;128;129;131;132;133;136;137;138;143;144;145;183;189;197;202;213;219;222;223;284;288;311;325;328;379;383;420;449;478;498;500;613;644
CCLE Hybrid Capture Mutations	JAK1	JAK1_p.K142	126;129;144;498;500
CCLE Hybrid Capture Mutations	JAK1	JAK1_p.K142fs	126;129;144;498;500
CCLE Hybrid Capture Mutations	JAK1	JAK1_p.K860	44;128;133;137;138;143;145;420;449
CCLE Hybrid Capture Mutations	JAK1	JAK1_p.K860fs	44;128;133;137;138;143;145;420;449
CCLE Hybrid Capture Mutations	JAK1	JAK1_p.P430	131;133;144;500
CCLE Hybrid Capture Mutations	JAK1	JAK1_p.P430fs	131;133;144;500
CCLE Hybrid Capture Mutations	JAK2	JAK2_p._ANY_CODING_MUTATION	126;128;132;135;141;144;145;152;193;195;203;213;219;272;313;330;356;437;498;524;543;662
CCLE Hybrid Capture Mutations	JAK3	JAK3_p._ANY_CODING_MUTATION	53;78;89;98;103;128;139;157;189;193;203;215;221;380;420;474;479;486;534;543;559;601
CCLE Hybrid Capture Mutations	JARID2	JARID2_p._ANY_CODING_MUTATION	53;86;130;131;139;146;162;193;199;202;203;210;218;219;221;222;226;363;437;452;498;535;592;613;663
CCLE Hybrid Capture Mutations	JUN	JUN_p._ANY_CODING_MUTATION	135;189;308
CCLE Hybrid Capture Mutations	JUNB	JUNB_p._ANY_CODING_MUTATION	129;183;221;364;663
CCLE Hybrid Capture Mutations	JUND	JUND_p._ANY_CODING_MUTATION	14;103;203;344;458
CCLE Hybrid Capture Mutations	KALRN	KALRN_p._ANY_CODING_MUTATION	9;19;21;32;40;43;53;61;69;79;116;126;128;130;131;132;133;135;136;137;138;139;141;144;145;149;157;164;185;189;192;198;203;205;213;214;219;220;221;226;250;266;294;296;305;310;315;350;351;358;364;366;368;372;373;380;386;388;389;394;400;401;403;404;433;435;436;449;458;460;490;504;507;512;513;517;531;535;538;547;559;562;580;583;584;587;599;611;632;638;639;652;661
CCLE Hybrid Capture Mutations	KALRN	KALRN_p.A2382	213;403;599
CCLE Hybrid Capture Mutations	KALRN	KALRN_p.A2382V	213;403;599
CCLE Hybrid Capture Mutations	KALRN	KALRN_p.E1326	135;400;580
CCLE Hybrid Capture Mutations	KALRN	KALRN_p.E1326D	135;400;580
CCLE Hybrid Capture Mutations	KALRN	KALRN_p.N2973	21;214;436;460;632
CCLE Hybrid Capture Mutations	KALRN	KALRN_p.N2973S	21;214;436;460;632
CCLE Hybrid Capture Mutations	KALRN	KALRN_p.P2255	128;220;250;401;404
CCLE Hybrid Capture Mutations	KALRN	KALRN_p.P2255T	128;220;250;401;404
CCLE Hybrid Capture Mutations	KAT6A	KAT6A_p._ANY_CODING_MUTATION	14;46;58;98;111;128;132;135;137;138;141;144;147;183;189;193;195;200;210;213;215;218;219;238;244;257;266;291;325;335;365;382;386;389;403;424;425;464;483;500;509;535;538;545;576;581;597;606;612;644
CCLE Hybrid Capture Mutations	KAT6A	KAT6A_p.E1109	111;147;238;244;291;403;424;464;581;597
CCLE Hybrid Capture Mutations	KAT6A	KAT6A_p.E1109del	111;147;238;244;291;403;424;464;581;597
CCLE Hybrid Capture Mutations	KAT6A	KAT6A_p.E1109del1	111;147;238;244;291;403;424;464;581;597
CCLE Hybrid Capture Mutations	KAT6B	KAT6B_p._ANY_CODING_MUTATION	4;12;17;18;20;21;26;30;33;34;39;44;45;52;53;54;56;58;60;69;70;71;75;77;81;85;92;93;101;105;108;109;110;113;117;126;128;130;131;132;134;135;136;138;141;144;145;147;148;150;152;162;166;172;173;178;189;192;193;195;198;203;204;209;210;213;215;219;220;221;223;225;227;233;236;241;247;248;250;251;252;255;263;267;275;276;279;295;296;297;299;300;301;305;308;310;316;321;326;331;332;340;350;352;353;361;368;…
CCLE Hybrid Capture Mutations	KAT6B	KAT6B_p.E1083	85;105;295;369;467;525;599
CCLE Hybrid Capture Mutations	KAT6B	KAT6B_p.E1083del	85;105;295;369;467;525;599
CCLE Hybrid Capture Mutations	KAT6B	KAT6B_p.E1083del4	85;105;295;369;467;525;599
CCLE Hybrid Capture Mutations	KAT6B	KAT6B_p.E1104	12;17;18;20;21;26;30;33;34;45;52;53;54;60;69;71;75;77;93;101;108;109;110;113;131;134;135;136;147;148;150;152;162;166;172;173;178;189;193;198;210;213;215;220;233;236;241;247;248;250;251;252;255;263;267;275;276;279;296;301;305;308;316;321;326;340;350;352;353;361;368;372;374;375;383;384;385;386;391;392;393;396;398;399;401;403;404;413;421;422;423;429;435;436;438;440;443;449;450;460;466;468;471;478;47…
CCLE Hybrid Capture Mutations	KAT6B	KAT6B_p.E1104del	12;17;18;20;21;26;30;33;34;45;52;53;54;60;69;71;75;77;93;101;108;109;110;113;131;134;135;136;147;148;150;152;162;166;172;173;178;189;193;198;210;213;215;220;233;236;241;247;248;250;251;252;255;263;267;275;276;279;296;301;305;308;316;321;326;340;350;352;353;361;368;372;374;375;383;384;385;386;391;392;393;396;398;399;401;403;404;413;421;422;423;429;435;436;438;440;443;449;450;460;466;468;471;478;47…
CCLE Hybrid Capture Mutations	KAT6B	KAT6B_p.E1104del1	12;17;18;20;21;26;30;33;34;45;52;53;54;60;69;71;75;77;93;101;108;109;110;113;131;134;135;136;147;148;150;152;162;166;172;173;178;189;193;198;210;213;215;220;233;236;241;247;248;250;251;252;255;263;267;275;276;279;296;301;305;308;316;321;326;340;350;352;353;361;368;372;374;375;383;384;385;386;391;392;393;396;398;399;401;403;404;413;421;422;423;429;435;436;438;440;443;449;450;460;466;468;471;478;47…
CCLE Hybrid Capture Mutations	KAT6B	KAT6B_p.E1366	58;92;141;209;223;373;620
CCLE Hybrid Capture Mutations	KAT6B	KAT6B_p.E1366del	58;92;141;209;223;373;620
CCLE Hybrid Capture Mutations	KAT6B	KAT6B_p.E1366del3	58;92;141;209;223;373;620
CCLE Hybrid Capture Mutations	KAT6B	KAT6B_p.X1104	81;227;520
CCLE Hybrid Capture Mutations	KAT6B	KAT6B_p.X1104ins	81;227;520
CCLE Hybrid Capture Mutations	KAT6B	KAT6B_p.X1104insE	81;227;520
CCLE Hybrid Capture Mutations	KAT7	KAT7_p._ANY_CODING_MUTATION	128;132;136;141;189;193;197;198;218;256;268;278;303;364;368;498;508;541;613
CCLE Hybrid Capture Mutations	KCNH2	KCNH2_p._ANY_CODING_MUTATION	31;124;128;135;141;150;157;183;198;202;213;218;220;226;274;305;317;318;328;330;361;363;417;459;498;515;535;571;582;635
CCLE Hybrid Capture Mutations	KCNH2	KCNH2_p.P151	135;202;220;226
CCLE Hybrid Capture Mutations	KCNH2	KCNH2_p.P151fs	135;202;220;226
CCLE Hybrid Capture Mutations	KCTD14	KCTD14_p._ANY_CODING_MUTATION	132;136;340;348;351;446
CCLE Hybrid Capture Mutations	KDM5A	KDM5A_p._ANY_CODING_MUTATION	7;116;124;126;129;132;133;136;139;141;144;147;150;192;195;198;202;203;213;216;218;220;221;247;268;272;283;315;323;351;356;364;367;372;383;393;405;437;449;478;498;500;513;535;613;621;622;643
CCLE Hybrid Capture Mutations	KDM5A	KDM5A_p.K1199	133;136;144;192;198;203;220;221;268;437;500
CCLE Hybrid Capture Mutations	KDM5A	KDM5A_p.K1199fs	133;136;144;192;198;203;220;221;268;437;500
CCLE Hybrid Capture Mutations	KDM6A	KDM6A_p._ANY_CODING_MUTATION	16;42;127;128;129;133;136;141;143;178;189;198;202;219;226;260;263;286;317;377;388;437;493;606;613;617;618;637;645;648;651;654;655;662;663;664
CCLE Hybrid Capture Mutations	KDR	KDR_p._ANY_CODING_MUTATION	32;39;60;80;128;132;136;141;144;145;170;189;195;202;205;213;214;215;218;232;278;291;294;298;313;315;333;334;335;342;344;353;359;369;420;442;494;499;500;513;524;538;545;547;555;559;583;605;616;644
CCLE Hybrid Capture Mutations	KIAA1549	KIAA1549_p._ANY_CODING_MUTATION	12;41;53;61;85;90;113;126;130;131;132;135;138;144;189;192;193;195;198;199;201;202;203;210;213;218;221;226;229;253;268;291;320;340;345;348;364;369;420;437;449;491;498;542;575;630;639;653;657
CCLE Hybrid Capture Mutations	KIAA1549	KIAA1549_p.L283	199;213;449
CCLE Hybrid Capture Mutations	KIAA1549	KIAA1549_p.L283fs	199;213;449
CCLE Hybrid Capture Mutations	KIAA1804	KIAA1804_p._ANY_CODING_MUTATION	6;96;110;126;133;136;185;189;193;195;199;213;215;218;221;249;268;342;376;420;513;520;538;554;579;605;606
CCLE Hybrid Capture Mutations	KIAA1804	KIAA1804_p.R553	221;605;606
CCLE Hybrid Capture Mutations	KIAA2022	KIAA2022_p._ANY_CODING_MUTATION	70;99;103;121;122;128;132;135;137;145;157;183;189;193;195;209;213;218;219;227;257;274;293;304;312;322;334;348;365;383;395;409;416;444;499;506;516;531;535;538;541;550;552;564;567;611;621;627;652
CCLE Hybrid Capture Mutations	KIT	KIT_p._ANY_CODING_MUTATION	27;36;38;72;126;132;141;173;189;193;206;213;218;308;313;333;339;364;386;392;394;445;483;586
CCLE Hybrid Capture Mutations	KLF6	KLF6_p._ANY_CODING_MUTATION	60;141;218;346;425;462;603
CCLE Hybrid Capture Mutations	KLF6	KLF6_p.E246	346;425;462
CCLE Hybrid Capture Mutations	KLF6	KLF6_p.E246K	346;425;462
CCLE Hybrid Capture Mutations	KLK3	KLK3_p._ANY_CODING_MUTATION	31;128;141;152;193;195;210;276;351;500;585
CCLE Hybrid Capture Mutations	KLK7	KLK7_p._ANY_CODING_MUTATION	32;141;193;220;379;383;505
CCLE Hybrid Capture Mutations	KMT2A	KMT2A_p._ANY_CODING_MUTATION	7;8;9;35;40;90;117;126;128;129;132;135;136;137;141;150;161;179;183;189;193;195;198;210;212;213;218;219;233;255;269;273;286;288;300;351;379;396;405;416;420;424;451;459;478;504;508;559;571;575;584;598;613;619;633;636
CCLE Hybrid Capture Mutations	KMT2A	KMT2A_p.G3131	7;8;117;269;405;424;478;584;636
CCLE Hybrid Capture Mutations	KMT2A	KMT2A_p.G3131S	7;8;117;269;405;424;478;584;636
CCLE Hybrid Capture Mutations	KMT2A	KMT2A_p.T771	137;210;571
CCLE Hybrid Capture Mutations	KMT2A	KMT2A_p.T771fs	137;210;571
CCLE Hybrid Capture Mutations	KMT2C	KMT2C_p._ANY_CODING_MUTATION	14;38;48;52;53;57;58;63;64;69;70;71;72;73;75;85;87;90;91;98;110;112;116;122;126;127;128;129;130;131;132;133;135;136;137;138;141;143;144;145;150;152;163;164;167;169;174;182;183;185;189;191;192;193;195;196;197;198;199;201;203;205;207;208;210;213;214;215;216;218;219;220;221;223;226;227;229;232;250;260;266;268;269;273;277;282;291;293;301;305;307;310;317;320;323;327;328;330;333;335;346;351;360;364;370…
CCLE Hybrid Capture Mutations	KMT2C	KMT2C_p.F4496	129;437;499;500;584
CCLE Hybrid Capture Mutations	KMT2C	KMT2C_p.F4496fs	129;437;499;500;584
CCLE Hybrid Capture Mutations	KMT2C	KMT2C_p.G892	73;116;167
CCLE Hybrid Capture Mutations	KMT2C	KMT2C_p.G892E	73;116;167
CCLE Hybrid Capture Mutations	KMT2C	KMT2C_p.K2797	126;128;129;130;135;138;143;144;150;192;199;203;215;219;220;226;268;420;500;575;644
CCLE Hybrid Capture Mutations	KMT2C	KMT2C_p.K2797fs	126;128;129;130;135;138;143;144;150;192;199;203;215;219;220;226;268;420;500;575;644
CCLE Hybrid Capture Mutations	KMT2C	KMT2C_p.Y816	48;58;63;64;71;75;85;87;112;152;174;191;197;201;208;229;232;250;277;301;305;330;335;360;370;380;385;386;391;392;395;401;403;404;405;407;441;447;454;465;469;474;482;491;503;504;532;545;560;578;579;580;586;622;626;628;629;630;631;633;644;648;652;664
CCLE Hybrid Capture Mutations	KMT2C	KMT2C_p.Y816fs	48;58;63;64;71;75;85;87;112;152;174;191;197;201;208;229;232;250;277;301;305;330;335;360;370;380;385;386;391;392;395;401;403;404;405;407;441;447;454;465;469;474;482;491;503;504;532;545;560;578;579;580;586;622;626;628;629;630;631;633;644;648;652;664
CCLE Hybrid Capture Mutations	KPNA5	KPNA5_p._ANY_CODING_MUTATION	126;128;132;136;141;167;226;269;272;339;395;420;483;513
CCLE Hybrid Capture Mutations	KRAS	KRAS_p._ANY_CODING_MUTATION	4;15;21;60;67;130;131;132;134;136;146;156;184;189;191;192;193;199;200;201;202;204;207;209;211;212;215;218;219;222;224;225;227;228;229;230;253;256;258;260;268;273;277;279;285;291;295;298;301;305;307;308;313;321;324;329;332;335;341;349;350;353;356;357;359;363;364;367;372;373;377;381;382;390;419;425;430;435;437;446;449;451;453;454;455;456;458;459;460;461;462;463;464;465;466;467;468;469;471;473;474;4…
CCLE Hybrid Capture Mutations	KRAS	KRAS_p.G12	4;15;21;60;130;131;134;146;191;201;202;204;209;211;212;215;219;222;224;225;227;228;253;256;260;273;277;285;291;295;298;305;308;313;324;332;335;341;349;350;353;356;357;367;372;373;377;381;382;390;419;425;430;446;451;453;454;455;456;458;460;461;462;463;464;465;466;467;468;469;471;473;474;477;478;479;480;481;482;483;484;486;487;488;568;576;581;594;596;603;644;663
CCLE Hybrid Capture Mutations	KRAS	KRAS_p.G12A	4;222;313;332;372
CCLE Hybrid Capture Mutations	KRAS	KRAS_p.G12C	224;228;256;273;285;291;298;308;324;335;341;350;356;381;390;430;466;663
CCLE Hybrid Capture Mutations	KRAS	KRAS_p.G12D	15;21;130;131;134;202;204;212;215;219;277;377;382;419;425;446;451;458;464;465;467;469;471;473;477;478;479;483;484;486;576;581;596;644
CCLE Hybrid Capture Mutations	KRAS	KRAS_p.G12R	305;460;462;480;487;603
CCLE Hybrid Capture Mutations	KRAS	KRAS_p.G12V	60;146;191;209;211;225;227;260;295;353;357;367;373;453;454;455;456;461;463;468;474;481;482;488;568;594
CCLE Hybrid Capture Mutations	KRAS	KRAS_p.G13	67;192;193;199;207;230;268;301;307;321;329;363;449
CCLE Hybrid Capture Mutations	KRAS	KRAS_p.G13C	301;307;321;449
CCLE Hybrid Capture Mutations	KRAS	KRAS_p.G13D	67;192;193;199;207;230;268;329;363
CCLE Hybrid Capture Mutations	KRAS	KRAS_p.Q61	184;229;258;279;359;364;459;597
CCLE Hybrid Capture Mutations	KRAS	KRAS_p.Q61H	184;279;359;459
CCLE Hybrid Capture Mutations	KSR1	KSR1_p._ANY_CODING_MUTATION	17;95;103;122;128;130;131;135;136;141;150;163;189;198;199;211;213;215;311;386;449;489;498;531;564;571;584;624
CCLE Hybrid Capture Mutations	KSR1	KSR1_p.P152	128;136;150;189;198;199;215;449;571
CCLE Hybrid Capture Mutations	KSR1	KSR1_p.P152fs	128;136;150;189;198;199;215;449;571
CCLE Hybrid Capture Mutations	KSR2	KSR2_p._ANY_CODING_MUTATION	15;26;67;84;87;130;131;133;139;141;145;146;156;157;183;189;202;203;210;213;233;247;268;279;313;320;338;343;344;361;379;394;404;406;451;464;513;531;537;541;580;584;585;662
CCLE Hybrid Capture Mutations	KTN1	KTN1_p._ANY_CODING_MUTATION	71;78;100;126;128;130;131;132;134;144;185;189;192;203;213;218;245;259;265;266;272;276;300;358;380;416;445;481;487;498;499;509;538;575;624;654
CCLE Hybrid Capture Mutations	LAMA1	LAMA1_p._ANY_CODING_MUTATION	15;18;37;41;43;44;62;70;78;98;109;110;111;126;127;128;129;132;134;135;138;141;145;146;156;157;158;174;183;185;189;193;195;198;203;210;213;218;219;221;226;238;241;249;255;265;268;271;272;274;275;296;306;310;313;314;321;324;325;326;329;338;340;342;350;364;365;366;367;372;380;388;393;394;400;408;419;420;435;455;474;477;479;480;483;491;498;500;504;508;509;513;521;522;531;538;541;544;549;557;585;589;5…
CCLE Hybrid Capture Mutations	LAMA1	LAMA1_p.G919	189;238;249;480
CCLE Hybrid Capture Mutations	LAMA1	LAMA1_p.G919R	189;238;249;480
CCLE Hybrid Capture Mutations	LAMA1	LAMA1_p.S2738	110;521;598
CCLE Hybrid Capture Mutations	LAMA1	LAMA1_p.S2738W	110;521;598
CCLE Hybrid Capture Mutations	LAMP1	LAMP1_p._ANY_CODING_MUTATION	27;44;142;183;199;232;249;330;351;584
CCLE Hybrid Capture Mutations	LASP1	LASP1_p._ANY_CODING_MUTATION	132;137;281;365;595;613
CCLE Hybrid Capture Mutations	LATS1	LATS1_p._ANY_CODING_MUTATION	40;53;60;80;129;130;131;132;137;141;158;192;193;195;198;213;218;221;225;243;291;293;313;340;372;378;380;387;423;445;500;533;538;559;560;645
CCLE Hybrid Capture Mutations	LATS1	LATS1_p.P237	60;221;291;372;423;445
CCLE Hybrid Capture Mutations	LATS1	LATS1_p.P237Q	60;291;372;423;445
CCLE Hybrid Capture Mutations	LATS2	LATS2_p._ANY_CODING_MUTATION	124;141;183;193;198;199;210;213;218;229;254;297;320;342;420;436;516;623;641;642
CCLE Hybrid Capture Mutations	LCK	LCK_p._ANY_CODING_MUTATION	12;70;128;132;135;139;145;192;198;213;221;301;349;487;500;645
CCLE Hybrid Capture Mutations	LCP1	LCP1_p._ANY_CODING_MUTATION	130;180;192;213;215;218;219;220;268;272;300;361;401;499;503;508;663
CCLE Hybrid Capture Mutations	LDHA	LDHA_p._ANY_CODING_MUTATION	126;185;195;210;230;317;359;419;513;613
CCLE Hybrid Capture Mutations	LDLR	LDLR_p._ANY_CODING_MUTATION	40;103;127;128;129;135;136;150;157;195;199;213;229;310;538;555;557;564;571;630
CCLE Hybrid Capture Mutations	LDLR	LDLR_p.V827	555;557;571
CCLE Hybrid Capture Mutations	LDLR	LDLR_p.V827I	555;557;571
CCLE Hybrid Capture Mutations	LEMD1	LEMD1_p._ANY_CODING_MUTATION	132;183;225;243;437
CCLE Hybrid Capture Mutations	LETM2	LETM2_p._ANY_CODING_MUTATION	56;117;138;167;193;195;208;213;235;501;504;634
CCLE Hybrid Capture Mutations	LETM2	LETM2_p.A299	117;235;504
CCLE Hybrid Capture Mutations	LETM2	LETM2_p.A299D	117;235;504
CCLE Hybrid Capture Mutations	LGR5	LGR5_p._ANY_CODING_MUTATION	45;126;128;135;137;138;145;158;189;193;195;197;226;305;358;364;379;380;500;567;576;590;598;609
CCLE Hybrid Capture Mutations	LIF	LIF_p._ANY_CODING_MUTATION	144;145;147;199;221;376;473;586;610;634
CCLE Hybrid Capture Mutations	LIFR	LIFR_p._ANY_CODING_MUTATION	21;37;39;76;99;126;128;131;132;141;143;155;193;195;198;213;218;221;240;313;335;339;352;364;368;415;420;498;500;506;525;535;542;607;618
CCLE Hybrid Capture Mutations	LIMK1	LIMK1_p._ANY_CODING_MUTATION	129;132;199;213;221;232;332;356;364;516;536;553;559
CCLE Hybrid Capture Mutations	LIMK2	LIMK2_p._ANY_CODING_MUTATION	22;96;128;131;156;170;176;183;214;220;226;347;358;405;420;444;554;573;579;639;648
CCLE Hybrid Capture Mutations	LIMK2	LIMK2_p.A571	156;183;226
CCLE Hybrid Capture Mutations	LIMK2	LIMK2_p.A571fs	156;183;226
CCLE Hybrid Capture Mutations	LMNA	LMNA_p._ANY_CODING_MUTATION	19;128;133;146;161;183;193;199;213;215;220;263;363;398;436;466;548;630
CCLE Hybrid Capture Mutations	LMNB1	LMNB1_p._ANY_CODING_MUTATION	41;124;135;189;203;213;281;368;451;511;613
CCLE Hybrid Capture Mutations	LMNB2	LMNB2_p._ANY_CODING_MUTATION	9;126;128;135;136;137;192;193;206;268;397;449;561;606;644;652
CCLE Hybrid Capture Mutations	LMO1	LMO1_p._ANY_CODING_MUTATION	12;132;213;274;551;594;644
CCLE Hybrid Capture Mutations	LMO2	LMO2_p._ANY_CODING_MUTATION	126;133;136;145;157;246;250;298;305;380;437;598
CCLE Hybrid Capture Mutations	LMO2	LMO2_p.I92	246;250;298
CCLE Hybrid Capture Mutations	LMO2	LMO2_p.I92V	246;250;298
CCLE Hybrid Capture Mutations	LMTK2	LMTK2_p._ANY_CODING_MUTATION	58;89;110;132;135;144;146;176;189;192;195;197;199;203;211;240;308;344;429;498;500;527;531;553;554;613;636
CCLE Hybrid Capture Mutations	LMTK3	LMTK3_p._ANY_CODING_MUTATION	128;137;144;146;192;286;307;364;416;498;537;547;644
CCLE Hybrid Capture Mutations	LNX2	LNX2_p._ANY_CODING_MUTATION	5;68;124;135;144;213;219;220;248;257;296;305;342;416;523;574;575;621
CCLE Hybrid Capture Mutations	LOC100130776	LOC100130776_p._ANY_CODING_MUTATION	128;144;213;644
CCLE Hybrid Capture Mutations	LPP	LPP_p._ANY_CODING_MUTATION	48;100;126;130;131;137;142;185;259;342;351;388;425;513;526;580;604;606;608;662
CCLE Hybrid Capture Mutations	LRGUK	LRGUK_p._ANY_CODING_MUTATION	24;43;68;124;128;129;132;136;141;179;181;193;195;197;199;202;203;220;221;226;227;298;299;304;315;333;432;437;604;605;608;623;631
CCLE Hybrid Capture Mutations	LRP1	LRP1_p._ANY_CODING_MUTATION	43;53;96;99;103;124;126;129;130;131;132;133;135;137;142;143;144;145;146;150;181;185;189;192;193;195;197;199;202;203;210;213;215;218;219;220;221;226;229;233;236;239;253;260;312;327;342;349;351;362;377;380;394;403;408;412;413;416;430;433;437;449;499;500;504;507;524;547;569;571;576;582;584;589;595;601;605;609;626;633;636;641;642;644;662
CCLE Hybrid Capture Mutations	LRP1	LRP1_p.P4190	145;146;189;215;408;571
CCLE Hybrid Capture Mutations	LRP1	LRP1_p.P4190fs	145;146;189;215;571
CCLE Hybrid Capture Mutations	LRP1	LRP1_p.T4189	135;193;219
CCLE Hybrid Capture Mutations	LRP1	LRP1_p.T4189fs	135;193;219
CCLE Hybrid Capture Mutations	LRP1B	LRP1B_p._ANY_CODING_MUTATION	20;31;35;39;42;53;60;64;67;69;70;74;93;98;99;112;115;116;124;125;126;127;128;129;131;132;135;136;137;141;143;144;146;158;166;170;176;182;183;189;192;193;195;197;199;202;203;205;208;210;213;214;215;218;219;221;222;224;226;227;239;240;243;244;254;255;256;259;260;265;266;268;269;271;273;274;276;279;285;291;292;294;300;305;308;310;311;312;313;321;323;324;328;329;330;331;334;335;336;340;342;344;348;34…
CCLE Hybrid Capture Mutations	LRP1B	LRP1B_p.R531	291;372;592;598
CCLE Hybrid Capture Mutations	LRP1B	LRP1B_p.R531H	291;372;592;598
CCLE Hybrid Capture Mutations	LRP1B	LRP1B_p.R799	382;483;618
CCLE Hybrid Capture Mutations	LRP2	LRP2_p._ANY_CODING_MUTATION	3;10;38;40;49;69;72;81;84;109;115;124;127;128;130;131;132;133;135;141;143;144;145;146;148;150;152;153;155;163;189;191;192;193;195;198;199;203;205;210;213;218;219;223;226;232;237;245;253;265;272;283;296;299;304;305;308;313;315;322;326;330;332;348;349;350;351;353;356;359;361;364;378;380;383;384;391;395;407;420;430;444;450;453;464;499;508;510;513;517;531;535;537;538;540;543;556;564;575;576;581;582;5…
CCLE Hybrid Capture Mutations	LRP2	LRP2_p.G522	10;69;84;556
CCLE Hybrid Capture Mutations	LRP2	LRP2_p.G522splice	10;84;556
CCLE Hybrid Capture Mutations	LRP6	LRP6_p._ANY_CODING_MUTATION	27;53;132;133;136;137;141;183;192;193;199;205;209;210;213;219;223;282;287;325;387;416;417;461;498;559;575;592;635;643;644;654;664
CCLE Hybrid Capture Mutations	LRRC2	LRRC2_p._ANY_CODING_MUTATION	68;127;146;198;215;218;460;547;637
CCLE Hybrid Capture Mutations	LRRC7	LRRC7_p._ANY_CODING_MUTATION	33;57;113;126;128;130;131;132;135;136;141;149;150;183;189;192;196;197;198;209;210;213;218;220;265;280;284;308;310;313;317;329;334;340;342;348;350;357;358;364;367;369;371;386;440;463;467;477;504;513;526;534;537;548;549;559;613;621;633;637;656
CCLE Hybrid Capture Mutations	LRRK1	LRRK1_p._ANY_CODING_MUTATION	14;30;115;128;132;134;135;136;143;145;157;183;189;193;195;199;202;203;213;215;219;296;301;365;377;381;387;407;425;437;473;513;557;589;606
CCLE Hybrid Capture Mutations	LRRK2	LRRK2_p._ANY_CODING_MUTATION	34;67;87;124;126;127;128;129;132;133;135;136;137;144;146;148;157;183;185;189;191;192;193;195;198;202;203;218;219;220;221;224;236;260;268;283;284;292;313;320;328;330;332;340;344;351;356;364;365;379;383;387;390;392;397;420;424;425;433;437;454;455;471;499;500;503;513;535;538;544;553;557;562;575;579;584;586;594;603;613;621;641;642;643;651
CCLE Hybrid Capture Mutations	LRRK2	LRRK2_p.L708	128;133;189
CCLE Hybrid Capture Mutations	LRRK2	LRRK2_p.L708fs	128;133;189
CCLE Hybrid Capture Mutations	LRRK2	LRRK2_p.S1636	203;220;268
CCLE Hybrid Capture Mutations	LRRK2	LRRK2_p.S1636fs	203;220;268
CCLE Hybrid Capture Mutations	LRRK2	LRRK2_p.W82	320;351;499
CCLE Hybrid Capture Mutations	LSP1	LSP1_p._ANY_CODING_MUTATION	128;167;218;246;364;377;451
CCLE Hybrid Capture Mutations	LTBR	LTBR_p._ANY_CODING_MUTATION	132;213;219;272;313;377;437;584;641
CCLE Hybrid Capture Mutations	LTK	LTK_p._ANY_CODING_MUTATION	56;103;129;135;137;178;193;198;215;288;301;304;362;375;391;399;575;592;616
CCLE Hybrid Capture Mutations	LTK	LTK_p.R569	56;375;399
CCLE Hybrid Capture Mutations	LTK	LTK_p.R569H	56;375;399
CCLE Hybrid Capture Mutations	LYN	LYN_p._ANY_CODING_MUTATION	12;130;131;132;141;144;198;202;218
CCLE Hybrid Capture Mutations	LZTR1	LZTR1_p._ANY_CODING_MUTATION	68;124;130;131;135;136;141;144;183;193;199;280;285;305;364;403;411;549;618;641;642
CCLE Hybrid Capture Mutations	MAF	MAF_p._ANY_CODING_MUTATION	62;213;219;376;488;506;652
CCLE Hybrid Capture Mutations	MAFB	MAFB_p._ANY_CODING_MUTATION	134;135;185;213;226;324;348
CCLE Hybrid Capture Mutations	MAGEB16	MAGEB16_p._ANY_CODING_MUTATION	33;101;131;132;141;144;189;253;303;305;403;593;612
CCLE Hybrid Capture Mutations	MAK	MAK_p._ANY_CODING_MUTATION	36;49;85;189;199;202;203;206;213;218;312;319;330;380;416;538;544;554;611;644
CCLE Hybrid Capture Mutations	MALT1	MALT1_p._ANY_CODING_MUTATION	39;126;128;198;199;218;281;295;301;368;407;444;494;589;644;653
CCLE Hybrid Capture Mutations	MAMDC4	MAMDC4_p._ANY_CODING_MUTATION	4;28;33;46;58;95;96;110;126;146;156;157;165;169;193;232;248;252;350;384;388;393;432;435;462;498;503;562;570;574;576;577;590;656;664
CCLE Hybrid Capture Mutations	MAMDC4	MAMDC4_p.T168	46;435;664
CCLE Hybrid Capture Mutations	MAMDC4	MAMDC4_p.T168fs	46;435;664
CCLE Hybrid Capture Mutations	MAML1	MAML1_p._ANY_CODING_MUTATION	41;129;130;135;137;144;157;189;198;199;213;389;392;432;435;460;541;571;579
CCLE Hybrid Capture Mutations	MAML2	MAML2_p._ANY_CODING_MUTATION	2;7;9;29;32;33;36;41;46;47;50;52;53;60;64;68;78;79;85;86;87;89;92;98;116;120;121;122;128;129;130;131;136;137;138;141;146;152;153;161;164;165;172;181;183;186;191;193;195;197;199;205;208;209;213;215;218;220;222;239;244;253;254;255;265;268;276;297;304;305;306;310;322;327;328;331;334;335;341;345;348;351;352;353;359;365;366;374;383;393;404;413;415;425;439;440;449;456;460;471;477;478;480;491;496;498;50…
CCLE Hybrid Capture Mutations	MAML2	MAML2_p.A17	136;220;584
CCLE Hybrid Capture Mutations	MAML2	MAML2_p.A17fs	136;220;584
CCLE Hybrid Capture Mutations	MAML2	MAML2_p.Q604	2;7;9;29;33;36;41;46;47;50;52;53;60;64;68;78;79;85;86;87;92;98;116;120;121;122;128;130;137;138;146;152;153;164;165;172;181;186;191;195;197;199;205;208;209;239;244;253;254;255;265;268;297;304;305;306;310;322;327;328;331;334;335;341;345;351;352;353;359;365;366;374;383;393;404;413;425;456;460;471;477;478;480;491;496;503;506;510;511;516;521;531;534;537;538;539;544;547;551;556;559;560;567;568;583;592;…
CCLE Hybrid Capture Mutations	MAML2	MAML2_p.Q604indel4>Q	2;7;9;29;33;36;41;46;47;50;52;53;60;64;68;78;79;85;86;87;92;98;116;120;121;122;128;130;137;138;146;152;153;164;165;172;181;186;191;195;197;199;205;208;209;239;244;253;254;255;265;268;297;304;305;306;310;322;327;328;331;334;335;341;345;351;352;353;359;365;366;374;383;393;404;413;425;456;460;471;477;478;480;491;496;503;506;510;511;516;521;531;534;537;538;539;544;547;551;556;559;560;567;568;583;592;…
CCLE Hybrid Capture Mutations	MAML3	MAML3_p.I740	209;394;521
CCLE Hybrid Capture Mutations	MAML3	MAML3_p.I740T	209;394;521
CCLE Hybrid Capture Mutations	MAP2K1	MAP2K1_p._ANY_CODING_MUTATION	3;43;135;141;146;213;226;239;359;417;506;524;593;617;623
CCLE Hybrid Capture Mutations	MAP2K2	MAP2K2_p._ANY_CODING_MUTATION	15;130;131;219;221;396;513;652
CCLE Hybrid Capture Mutations	MAP2K3	MAP2K3_p._ANY_CODING_MUTATION	26;53;84;111;130;131;132;136;137;141;170;195;213;226;268;282;319;329;351;363;367;391;500;516;605;621;632
CCLE Hybrid Capture Mutations	MAP2K3	MAP2K3_p.R175	195;213;226
CCLE Hybrid Capture Mutations	MAP2K3	MAP2K3_p.R175W	195;213;226
CCLE Hybrid Capture Mutations	MAP2K4	MAP2K4_p._ANY_CODING_MUTATION	44;69;113;126;132;135;137;141;144;179;189;193;203;213;218;221;223;351;366;383;413;453;536;616
CCLE Hybrid Capture Mutations	MAP2K4	MAP2K4_p.E232	141;218;453
CCLE Hybrid Capture Mutations	MAP2K4	MAP2K4_p.E232*	141;218;453
CCLE Hybrid Capture Mutations	MAP2K5	MAP2K5_p._ANY_CODING_MUTATION	16;132;141;145;218;340;385;392;405;419;489;537
CCLE Hybrid Capture Mutations	MAP2K6	MAP2K6_p._ANY_CODING_MUTATION	68;128;310;376;394;403;419;471;490;613;650
CCLE Hybrid Capture Mutations	MAP2K7	MAP2K7_p._ANY_CODING_MUTATION	193;199;213;219;221;226;227;229;357;584
CCLE Hybrid Capture Mutations	MAP3K10	MAP3K10_p._ANY_CODING_MUTATION	36;95;129;130;132;135;203;213;224;226;241;335;410;416;440;511;567;570;592;613;664
CCLE Hybrid Capture Mutations	MAP3K11	MAP3K11_p._ANY_CODING_MUTATION	40;57;130;131;137;144;149;189;205;258;259;264;317;356;541
CCLE Hybrid Capture Mutations	MAP3K12	MAP3K12_p._ANY_CODING_MUTATION	34;46;126;128;130;132;135;137;145;157;189;195;213;219;333;386;420;503;554;557;575
CCLE Hybrid Capture Mutations	MAP3K13	MAP3K13_p._ANY_CODING_MUTATION	12;27;31;39;63;64;68;122;128;130;131;137;144;167;189;193;197;203;213;226;232;249;252;254;295;325;344;392;425;461;473;490;499;536;580;584
CCLE Hybrid Capture Mutations	MAP3K13	MAP3K13_p.R915	122;137;425
CCLE Hybrid Capture Mutations	MAP3K13	MAP3K13_p.R915H	122;137;425
CCLE Hybrid Capture Mutations	MAP3K19	MAP3K19_p._ANY_CODING_MUTATION	33;53;56;67;113;116;122;128;132;136;137;141;143;146;189;193;203;206;213;216;218;221;226;319;332;345;347;349;375;387;393;425;437;452;458;490;512;516;564;575;578;585;598;606;623;637;644;651;653
CCLE Hybrid Capture Mutations	MAP3K19	MAP3K19_p.L980	33;122;623
CCLE Hybrid Capture Mutations	MAP3K2	MAP3K2_p._ANY_CODING_MUTATION	12;50;57;99;114;128;141;157;192;203;219;307;335;340;420;451;559;664
CCLE Hybrid Capture Mutations	MAP3K2	MAP3K2_p.L89	114;335;451;664
CCLE Hybrid Capture Mutations	MAP3K2	MAP3K2_p.L89splice	114;335;451;664
CCLE Hybrid Capture Mutations	MAP3K3	MAP3K3_p._ANY_CODING_MUTATION	68;69;85;109;128;144;203;219;313;331;416;419;633;641;642
CCLE Hybrid Capture Mutations	MAP3K4	MAP3K4_p._ANY_CODING_MUTATION	9;13;23;26;33;36;37;50;51;52;53;60;64;71;78;79;92;120;122;124;126;128;129;132;133;137;141;143;144;145;146;153;189;193;195;198;202;204;208;209;210;220;221;236;239;249;260;263;266;268;277;293;298;301;305;313;345;351;359;363;364;373;376;383;387;388;395;404;405;425;436;442;456;462;463;464;477;479;484;487;491;506;511;521;535;537;544;545;549;551;559;575;579;585;596;630;643;644;648;656;664
CCLE Hybrid Capture Mutations	MAP3K4	MAP3K4_p.A1199	9;13;26;33;36;50;51;52;53;60;64;71;78;79;92;120;122;126;128;133;153;204;208;209;239;260;293;298;301;305;345;351;359;363;364;383;387;388;404;425;436;456;462;463;464;477;479;487;491;506;521;535;537;549;551;559;575;630;644;648;656;664
CCLE Hybrid Capture Mutations	MAP3K4	MAP3K4_p.A1199del	9;13;26;33;36;50;51;52;53;60;64;71;78;79;92;120;122;126;128;133;153;204;208;209;239;260;293;298;301;305;345;351;359;363;364;383;387;388;404;425;436;456;462;463;464;477;479;487;491;506;521;535;537;549;551;559;575;630;644;648;656;664
CCLE Hybrid Capture Mutations	MAP3K4	MAP3K4_p.A1199del1	9;13;26;33;36;50;51;52;53;60;64;71;78;79;92;120;122;126;128;133;153;204;208;209;239;260;293;298;301;305;345;351;359;363;364;383;387;388;404;425;436;456;462;463;464;477;479;487;491;506;521;535;537;549;551;559;575;630;644;648;656;664
CCLE Hybrid Capture Mutations	MAP3K4	MAP3K4_p.K158	124;129;133;189;220
CCLE Hybrid Capture Mutations	MAP3K4	MAP3K4_p.K158fs	124;129;133;189;220
CCLE Hybrid Capture Mutations	MAP3K5	MAP3K5_p._ANY_CODING_MUTATION	54;64;76;98;135;138;141;146;156;158;180;183;198;213;329;344;356;408;437;465;492;510;511;519;527;537;538;541;542;553;554;559;639;643;658
CCLE Hybrid Capture Mutations	MAP3K5	MAP3K5_p.X988	54;64;76;180;329;492;519;658
CCLE Hybrid Capture Mutations	MAP3K5	MAP3K5_p.X988ins	54;64;76;180;329;492;519;658
CCLE Hybrid Capture Mutations	MAP3K5	MAP3K5_p.X988insD	54;64;76;180;329;492;519;658
CCLE Hybrid Capture Mutations	MAP3K6	MAP3K6_p._ANY_CODING_MUTATION	49;57;108;128;145;146;161;183;189;198;200;202;203;213;218;226;263;268;275;283;331;344;370;420;439;516;537;541;544;575;644
CCLE Hybrid Capture Mutations	MAP3K6	MAP3K6_p.K1125	57;145;203;268;331;537
CCLE Hybrid Capture Mutations	MAP3K6	MAP3K6_p.K1125del	57;145;203;268;331;537
CCLE Hybrid Capture Mutations	MAP3K6	MAP3K6_p.K1125del1	57;145;203;268;331;537
CCLE Hybrid Capture Mutations	MAP3K6	MAP3K6_p.P848	146;189;213;226;575
CCLE Hybrid Capture Mutations	MAP3K6	MAP3K6_p.P848fs	146;189;213;226;575
CCLE Hybrid Capture Mutations	MAP3K7	MAP3K7_p._ANY_CODING_MUTATION	13;126;128;135;139;144;152;155;198;213;358;584;606;613;640
CCLE Hybrid Capture Mutations	MAP3K8	MAP3K8_p._ANY_CODING_MUTATION	40;128;129;132;141;192;208;210;325;379;420;607
CCLE Hybrid Capture Mutations	MAP3K9	MAP3K9_p._ANY_CODING_MUTATION	67;95;99;115;143;193;195;198;213;258;268;296;332;341;378;391;407;420;437;513;534;535;538;542;559;582;605;621;664
CCLE Hybrid Capture Mutations	MAP4K1	MAP4K1_p._ANY_CODING_MUTATION	51;127;132;138;198;228;288;351;411;437;498;501;515;541;555;567;663
CCLE Hybrid Capture Mutations	MAP4K2	MAP4K2_p._ANY_CODING_MUTATION	45;126;132;157;213;268;306;317;333;392;538;657
CCLE Hybrid Capture Mutations	MAP4K3	MAP4K3_p._ANY_CODING_MUTATION	32;40;53;71;116;128;130;132;150;172;193;202;218;221;232;238;239;325;330;335;340;356;364;365;403;417;420;460;462;487;559;581;584;643;650
CCLE Hybrid Capture Mutations	MAP4K3	MAP4K3_p.F333	116;172;330;335;340;365;460
CCLE Hybrid Capture Mutations	MAP4K3	MAP4K3_p.F333splice	116;172;330;335;340;365;460
CCLE Hybrid Capture Mutations	MAP4K4	MAP4K4_p._ANY_CODING_MUTATION	3;37;130;131;132;133;135;141;164;179;189;192;193;199;213;218;251;271;272;305;319;380;417;500;502;537;613;641;642
CCLE Hybrid Capture Mutations	MAP4K5	MAP4K5_p._ANY_CODING_MUTATION	114;126;189;192;195;202;203;213;403;435;456;504;578;584
CCLE Hybrid Capture Mutations	MAP4K5	MAP4K5_p.R265	126;192;202;203
CCLE Hybrid Capture Mutations	MAP4K5	MAP4K5_p.R265fs	126;192;202;203
CCLE Hybrid Capture Mutations	MAPK1	MAPK1_p._ANY_CODING_MUTATION	40;135;189;213;509;617;643;664
CCLE Hybrid Capture Mutations	MAPK10	MAPK10_p._ANY_CODING_MUTATION	40;93;96;128;141;146;213;226;239;372;380;387;390;463;584;585;613;663
CCLE Hybrid Capture Mutations	MAPK11	MAPK11_p._ANY_CODING_MUTATION	144;192;193;213;288;292
CCLE Hybrid Capture Mutations	MAPK12	MAPK12_p._ANY_CODING_MUTATION	128;136;157;207;218;227;236;329;390;395;416;420;582;632
CCLE Hybrid Capture Mutations	MAPK13	MAPK13_p._ANY_CODING_MUTATION	40;213;498;500;606
CCLE Hybrid Capture Mutations	MAPK14	MAPK14_p._ANY_CODING_MUTATION	136;195;319;342;382;420;613;650
CCLE Hybrid Capture Mutations	MAPK15	MAPK15_p._ANY_CODING_MUTATION	129;135;185;269;313;342;356
CCLE Hybrid Capture Mutations	MAPK15	MAPK15_p.Q511	129;135;185
CCLE Hybrid Capture Mutations	MAPK15	MAPK15_p.Q511fs	129;135;185
CCLE Hybrid Capture Mutations	MAPK3	MAPK3_p._ANY_CODING_MUTATION	9;124;128;133;137;139;146;203;210;213;220;283;351;416;487;538;571;584;585;656
CCLE Hybrid Capture Mutations	MAPK4	MAPK4_p._ANY_CODING_MUTATION	126;129;136;146;195;203;210;213;218;223;226;232;294;325;329;404;459;484;510;644
CCLE Hybrid Capture Mutations	MAPK6	MAPK6_p._ANY_CODING_MUTATION	127;130;137;141;151;157;189;195;350;447;598
CCLE Hybrid Capture Mutations	MAPK7	MAPK7_p._ANY_CODING_MUTATION	57;84;93;124;126;132;136;146;148;178;183;189;203;206;213;251;351;357;375;376;380;403;498;531;541;556;584;586
CCLE Hybrid Capture Mutations	MAPK7	MAPK7_p.A296	183;251;375;376;586
CCLE Hybrid Capture Mutations	MAPK7	MAPK7_p.A296T	183;251;375;376;586
CCLE Hybrid Capture Mutations	MAPK8	MAPK8_p._ANY_CODING_MUTATION	3;126;132;136;162;189;197;314;351;362;380;592;613;623;656
CCLE Hybrid Capture Mutations	MAPK8IP2	MAPK8IP2_p._ANY_CODING_MUTATION	146;168;195;199;213;237;243;420;437;571;644
CCLE Hybrid Capture Mutations	MAPK9	MAPK9_p._ANY_CODING_MUTATION	132;185;192;213;403;488;535;538;643
CCLE Hybrid Capture Mutations	MAPKAPK2	MAPKAPK2_p._ANY_CODING_MUTATION	31;57;113;126;128;132;133;136;141;202;218;296;429;491;571;625
CCLE Hybrid Capture Mutations	MAPKAPK3	MAPKAPK3_p._ANY_CODING_MUTATION	135;202;220;283;305;375;498
CCLE Hybrid Capture Mutations	MAPKAPK3	MAPKAPK3_p.P28	135;202;220
CCLE Hybrid Capture Mutations	MAPKAPK3	MAPKAPK3_p.P28fs	135;202;220
CCLE Hybrid Capture Mutations	MAPKAPK5	MAPKAPK5_p._ANY_CODING_MUTATION	56;193;195;203;210;339;366;371;420;652
CCLE Hybrid Capture Mutations	MAPKBP1	MAPKBP1_p._ANY_CODING_MUTATION	24;132;135;136;137;138;139;145;157;174;189;201;202;209;213;219;268;301;331;341;384;387;397;412;449;498;499;537;539;545;584;598;605;606;613;620
CCLE Hybrid Capture Mutations	MAPKBP1	MAPKBP1_p.R752	24;268;331
CCLE Hybrid Capture Mutations	MAPKBP1	MAPKBP1_p.R752W	24;268;331
CCLE Hybrid Capture Mutations	MARK1	MARK1_p._ANY_CODING_MUTATION	126;127;132;135;136;141;156;193;198;203;213;218;219;227;252;263;305;313;331;335;350;356;398;400;401;430;549;571;606;644;654
CCLE Hybrid Capture Mutations	MARK2	MARK2_p._ANY_CODING_MUTATION	44;56;135;136;157;189;195;210;215;219;221;226;269;278;283;299;340;364;387;389;437;499;500;536;540;613
CCLE Hybrid Capture Mutations	MARK3	MARK3_p._ANY_CODING_MUTATION	30;86;126;128;132;135;141;144;192;198;213;218;219;343;498;506;509;576;577;650;656;664
CCLE Hybrid Capture Mutations	MARK4	MARK4_p._ANY_CODING_MUTATION	124;126;128;135;141;150;170;198;213;235;239;254;318;344;498;585;639
CCLE Hybrid Capture Mutations	MARK4	MARK4_p.I312	235;239;639
CCLE Hybrid Capture Mutations	MARK4	MARK4_p.I312V	235;239;639
CCLE Hybrid Capture Mutations	MAST1	MAST1_p._ANY_CODING_MUTATION	15;89;96;132;133;135;136;137;141;144;157;172;202;203;213;218;263;351;366;390;439;500;516;529;530;575;577;593;606
CCLE Hybrid Capture Mutations	MAST2	MAST2_p._ANY_CODING_MUTATION	13;18;22;30;32;45;57;70;91;92;126;128;133;135;138;141;143;144;157;180;189;198;199;202;205;212;213;215;218;219;264;365;373;427;498;500;532;538;554;558;606;644;664
CCLE Hybrid Capture Mutations	MAST3	MAST3_p._ANY_CODING_MUTATION	30;76;129;130;131;135;174;185;213;225;466;513;569;589;601
CCLE Hybrid Capture Mutations	MAST4	MAST4_p._ANY_CODING_MUTATION	57;63;68;89;128;129;130;132;146;150;151;156;163;170;173;183;189;192;198;202;204;205;213;218;220;221;240;245;251;272;276;277;287;292;293;295;313;316;344;367;371;379;382;388;441;458;464;488;505;529;530;531;535;538;542;575;583;598;619;625
CCLE Hybrid Capture Mutations	MAST4	MAST4_p.L149	129;170;388
CCLE Hybrid Capture Mutations	MAST4	MAST4_p.L149M	129;170;388
CCLE Hybrid Capture Mutations	MAST4	MAST4_p.L1827	163;287;583
CCLE Hybrid Capture Mutations	MAST4	MAST4_p.L1827del	163;287;583
CCLE Hybrid Capture Mutations	MAST4	MAST4_p.L1827del1	163;287;583
CCLE Hybrid Capture Mutations	MAST4	MAST4_p.S1871	221;240;292;382;464;488
CCLE Hybrid Capture Mutations	MAST4	MAST4_p.S1871del	221;240;292;382;464;488
CCLE Hybrid Capture Mutations	MAST4	MAST4_p.S1871del1	221;240;292;382;464;488
CCLE Hybrid Capture Mutations	MASTL	MASTL_p._ANY_CODING_MUTATION	113;124;127;132;192;210;220;225;331;372;374;388;442;444;500;537;575;619;640;652
CCLE Hybrid Capture Mutations	MATK	MATK_p._ANY_CODING_MUTATION	71;135;312;383;407;499;538;576;662
CCLE Hybrid Capture Mutations	MAX	MAX_p._ANY_CODING_MUTATION	136;157;356;367;372;408;633
CCLE Hybrid Capture Mutations	MBIP	MBIP_p._ANY_CODING_MUTATION	133;189;229;345;347;416;499;500;590
CCLE Hybrid Capture Mutations	MCF2	MCF2_p._ANY_CODING_MUTATION	44;78;111;126;127;132;135;141;183;189;195;213;218;219;256;265;273;282;324;330;338;343;380;383;386;405;435;495;499;507;535;537;584;594;616;648
CCLE Hybrid Capture Mutations	MCL1	MCL1_p._ANY_CODING_MUTATION	115;128;130;136;311;538
CCLE Hybrid Capture Mutations	MCM3AP	MCM3AP_p._ANY_CODING_MUTATION	17;37;108;109;112;122;126;130;132;136;139;141;145;151;152;157;163;165;183;189;193;213;215;230;243;271;311;335;342;347;348;433;451;498;500;554;575;592;645
CCLE Hybrid Capture Mutations	MCM4	MCM4_p._ANY_CODING_MUTATION	124;128;130;131;138;169;170;179;189;198;203;210;219;293;305;317;348;350;394;399;416;581;584;594;598;611;644
CCLE Hybrid Capture Mutations	MCM4	MCM4_p.K627	138;189;416
CCLE Hybrid Capture Mutations	MCM4	MCM4_p.K627fs	138;189;416
CCLE Hybrid Capture Mutations	MDM2	MDM2_p._ANY_CODING_MUTATION	33;128;132;163;189;195;213;218;220;221;244;300;341;413;416;576
CCLE Hybrid Capture Mutations	MDM4	MDM4_p._ANY_CODING_MUTATION	89;128;137;144;183;192;193;195;198;213;298;360;374;390;613;645
CCLE Hybrid Capture Mutations	MECOM	MECOM_p._ANY_CODING_MUTATION	24;44;50;53;69;85;124;128;133;144;150;189;192;193;198;203;204;213;215;216;218;221;223;246;250;254;258;277;312;313;364;369;380;388;399;411;433;480;498;499;507;510;513;515;520;532;536;538;544;562;592;624;631;644;645;647
CCLE Hybrid Capture Mutations	MECOM	MECOM_p.K801	53;124;133;203;215
CCLE Hybrid Capture Mutations	MECOM	MECOM_p.K801fs	53;124;133;203;215
CCLE Hybrid Capture Mutations	MED13L	MED13L_p._ANY_CODING_MUTATION	53;68;114;124;126;128;130;131;132;136;139;141;146;157;189;199;205;210;213;218;221;246;275;312;314;320;342;380;444;499;510;547;571;589;592;595;600;613;619;644;651
CCLE Hybrid Capture Mutations	MEF2A	MEF2A_p._ANY_CODING_MUTATION	7;22;48;53;60;87;128;134;137;145;158;192;193;206;283;291;292;326;342;352;359;369;426;464;477;487;567;583;589;603;612
CCLE Hybrid Capture Mutations	MEF2A	MEF2A_p.P435	128;134;359;583
CCLE Hybrid Capture Mutations	MEF2A	MEF2A_p.P435del	128;134;359;583
CCLE Hybrid Capture Mutations	MEF2A	MEF2A_p.P435del1	128;134;359;583
CCLE Hybrid Capture Mutations	MEF2A	MEF2A_p.Q428	22;87;145;206;291;292;326;464;487;567
CCLE Hybrid Capture Mutations	MEF2A	MEF2A_p.Q428del	22;87;145;206;291;292;326;464;487;567
CCLE Hybrid Capture Mutations	MEF2A	MEF2A_p.Q428del2	22;87;145;206;291;292;326;464;487;567
CCLE Hybrid Capture Mutations	MEF2A	MEF2A_p.Q430	352;426;589
CCLE Hybrid Capture Mutations	MEF2A	MEF2A_p.Q430del	352;426;589
CCLE Hybrid Capture Mutations	MEF2A	MEF2A_p.Q430del1	352;426;589
CCLE Hybrid Capture Mutations	MELK	MELK_p._ANY_CODING_MUTATION	46;53;62;71;126;136;175;189;193;197;212;213;221;267;326;432;500;553;613;657
CCLE Hybrid Capture Mutations	MEN1	MEN1_p._ANY_CODING_MUTATION	102;135;157;199;202;221;449;498;500;529;530;544
CCLE Hybrid Capture Mutations	MERTK	MERTK_p._ANY_CODING_MUTATION	90;130;132;138;175;179;183;189;192;202;210;218;219;226;256;258;333;353;365;387;403;453;483;512;513;542;580;584;603;621;652
CCLE Hybrid Capture Mutations	MERTK	MERTK_p.S428	179;387;580;584
CCLE Hybrid Capture Mutations	MERTK	MERTK_p.S428G	179;387;580;584
CCLE Hybrid Capture Mutations	MET	MET_p._ANY_CODING_MUTATION	57;80;110;124;126;128;130;132;141;144;167;186;187;192;195;203;206;218;219;221;265;276;305;326;327;351;362;369;397;404;406;421;479;513;539;573;578;582;583;590;598;662
CCLE Hybrid Capture Mutations	MET	MET_p.L211	110;421;479
CCLE Hybrid Capture Mutations	MET	MET_p.L211W	110;421;479
CCLE Hybrid Capture Mutations	MFSD2A	MFSD2A_p._ANY_CODING_MUTATION	18;60;99;125;130;131;135;144;213
CCLE Hybrid Capture Mutations	MFSD4	MFSD4_p._ANY_CODING_MUTATION	53;180;193;500;604;629;645
CCLE Hybrid Capture Mutations	MGA	MGA_p._ANY_CODING_MUTATION	2;40;70;75;90;122;126;128;129;132;136;139;141;145;149;163;173;189;191;195;198;204;213;218;219;220;221;226;263;268;276;277;286;297;300;338;343;349;364;373;379;382;386;389;397;403;413;420;433;456;498;500;504;521;535;538;539;560;562;567;569;575;579;584;598;600;603;644;656
CCLE Hybrid Capture Mutations	MGA	MGA_p.V1993	75;163;338;569;656
CCLE Hybrid Capture Mutations	MGA	MGA_p.V1993F	75;163;338;569;656
CCLE Hybrid Capture Mutations	MGC42105	MGC42105_p._ANY_CODING_MUTATION	130;131;150;175;192;218;219;226;315;344;538;560
CCLE Hybrid Capture Mutations	MINK1	MINK1_p._ANY_CODING_MUTATION	29;40;91;126;128;129;133;135;136;137;144;145;156;183;193;207;213;239;351;438;479;498;513;538;562;644;654
CCLE Hybrid Capture Mutations	MITF	MITF_p._ANY_CODING_MUTATION	115;129;135;141;213;218;219;221;249;285;326;498;598;613;621;627
CCLE Hybrid Capture Mutations	MKL1	MKL1_p._ANY_CODING_MUTATION	33;56;68;126;128;131;135;138;150;183;192;199;203;210;213;325;406;433;439;441;499;534;540;554;555;580;581;584;643
CCLE Hybrid Capture Mutations	MKNK1	MKNK1_p._ANY_CODING_MUTATION	70;146;197;285;313;416;606;611;624
CCLE Hybrid Capture Mutations	MKRN3	MKRN3_p._ANY_CODING_MUTATION	87;132;135;144;145;150;189;199;205;213;218;220;236;249;252;272;276;278;288;305;307;313;318;320;335;348;387;420;538;541
CCLE Hybrid Capture Mutations	MLF1	MLF1_p._ANY_CODING_MUTATION	132;195;314;600
CCLE Hybrid Capture Mutations	MLH1	MLH1_p._ANY_CODING_MUTATION	39;51;122;129;132;133;135;136;138;157;163;183;185;189;192;193;202;203;210;213;218;220;313;324;367;375;419;420;430;458;466;499;537;538;564;624;644;650;653
CCLE Hybrid Capture Mutations	MLH1	MLH1_p.R217	133;138;375
CCLE Hybrid Capture Mutations	MLH1	MLH1_p.R217C	133;138;375
CCLE Hybrid Capture Mutations	MLKL	MLKL_p._ANY_CODING_MUTATION	21;36;71;114;126;132;139;146;150;189;192;199;203;213;228;272;382;432;532;610;655
[truncated: 1,579 more rows]

## Sheet: S7
enriched_protein_target	enriched_cell_line_feature	gene_symbol_of_enriched_feature	hotspot_q_value	hotspot_size	hotspot_log_likelihood	hotspot_median_AUC	delta_AUC_between_hotspot_and_null	compound_cluster_id	compound_cluster_q_value	compound_cluster_log_odds	compound_cluster_confidence	compound_cluster_purity	compound_cluster_members	compound_cluster_members_with_enriched_protein_target	cell_line_cluster_id	cell_line_cluster_q_value	cell_line_cluster_log_odds	cell_line_cluster_confidence	cell_line_cluster_purity	cell_line_cluster_members	cell_line_cluster_members_with_enriched_cell_line_feature
[truncated: 33,862 more rows]
